# Supplementary material for: An Improved Deep Learning Model: S-TextBLCNN for Traditional Chinese Medicine Formula Classification
Source: Front Genet. 2021 Dec 22;12:807825. doi: 10.3389/fgene.2021.807825 (PMC8727750; doi:10.3389/fgene.2021.807825)
Supplement: Supplementary file 1 [file DataSheet1.xlsx]

## Sheet: Sheet1
方名	方药规范化	方治法功效	方剂功效大类
增液汤	['玄参', '麦冬', '生地黄']	增液润燥	['治燥']
通幽汤	['炙甘草', '红花', '生地黄', '熟地黄', '升麻', '桃仁', '当归']	养血活血、润燥通幽	['治燥', '补益', '理血']
平肝潜阳方	['珍珠母', '牡蛎', '槐花', '豨莶草', '牛膝', '赤芍']	平肝潜阳	['治风']
镇肝熄风汤	['龙骨', '牡蛎', '龟甲', '白芍', '玄参', '天冬']	镇肝熄风	['治风']
平肝潜阳汤	['珍珠母', '牡蛎', '槐花', '豨莶草', '夏枯草', '牛膝', '赤芍']	平肝潜阳	['治风']
镇肝熄风汤加减	['代赭石', '牛膝', '生龙骨', '生牡蛎', '白芍', '龟甲', '天冬', '玄参', '甘草', '茵陈', '川楝子', '麦芽']	平肝熄风潜阳	['治风']
天麻钩藤饮	['天麻', '钩藤', '石决明', '川牛膝', '黄芩', '黑山栀', '杜仲', '桑寄生', '茯神', '首乌藤', '益母草']	平肝潜阳	['治风']
黄芪桂枝五物汤	['黄芪', '桂枝', '芍药', '生姜', '大枣']	调养荣卫、祛风散邪	['治风']
天麻钩藤饮	['天麻', '钩藤', '石决明', '栀子', '黄芩', '牛膝', '桑寄生', '杜仲', '首乌藤', '益母草', '茯神']	平肝潜阳	['治风']
羚羊角汤	['羚羊角', '龟甲', '生地黄', '白芍', '牡丹皮', '柴胡', '薄荷', '菊花', '夏枯草', '蝉蜕', '大枣', '石决明']	平肝潜阳	['治风']
建瓴汤	['山药', '牛膝', '代赭石', '龙骨', '牡蛎', '生地黄', '白芍', '柏子仁']	镇肝熄风	['治风']
羚羊角骨汤	['羚羊角', '钩藤', '白芍', '地龙', '石决明', '天竺黄', '茯苓', '杜仲', '牛膝']	平肝熄风	['治风']
清脑降压片	['黄芩', '夏枯草', '槐花', '磁石', '牛膝', '当归', '地黄', '丹参', '水蛭', '钩藤', '决明子', '地龙', '珍珠母']	平肝潜阳、	['治风']
天麻钩藤饮	['天麻', '钩藤', '石决明', '栀子', '黄芩', '牛膝', '杜仲', '益母草', '桑寄生', '首乌藤', '茯神']	平肝潜阳熄风	['治风']
羚羊钩藤汤加减	['羚羊角', '钩藤', '天麻', '天冬', '桑叶', '生地黄', '菊花', '茯神', '白芍', '石决明', '牛膝', '代赭石', '珍珠母', '浙贝母', '玄参', '牡蛎', '竹茹']	镇肝熄风	['治风']
复方槐花降压方	['槐花', '夏枯草', '菊花', '川芎', '地龙', '草决明', '桑寄生']	平肝潜阳	['治风']
降压方	['石决明', '罗布麻叶', '豨莶草', '白芍', '益母草', '汉防己', '桑寄生', '丹参']	平肝潜阳	['治风']
三草随机变方	['夏枯草', '龙胆草', '益母草', '芍药', '甘草']	平肝潜阳	['治风']
芝麻钩藤饮	['黑芝麻', '钩藤', '桑叶', '牛膝', '杜仲', '陈皮', '茯苓', '丹参', '酸枣仁', '柏子仁', '谷芽', '麦芽', '生姜', '大枣', '甘草']	平肝潜阳	['治风']
清脑降压片	['黄芩', '夏枯草', '槐花', '磁石', '牛膝', '当归', '地黄', '丹参', '水蛭', '钩藤', '决明子', '地龙', '珍珠母']	平肝潜阳、清脑降压	['治风']
镇肝熄风汤加减	['牛膝', '代赭石', '天麻', '钩藤', '白芍', '龟甲', '龙骨', '牡蛎', '天冬', '茵陈', '石决明', '玄参', '麦芽', '川楝子']	镇肝潜阳、熄风止痉	['治风']
居跃君经验方	['天麻', '钩藤', '桑叶', '菊花', '赤芍', '白芍', '丹参', '葛根', '珍珠母', '酸枣仁', '杜仲', '桑寄生']	平肝潜阳、宁神安眠	['治风']
天麻钩藤饮	['川牛膝', '钩藤', '黑山栀', '杜仲', '黄芩', '益母草', '桑寄生', '首乌藤', '朱茯神']	平肝潜阳	['治风']
半夏白术天麻汤加减	['半夏', '天麻', '茯苓', '白术', '陈皮', '甘草', '生姜', '大枣']	祛风化痰	['治风', '祛痰']
柴守方经验方	['党参', '白术', '茯苓', '天麻', '半夏', '菖蒲', '生姜', '竹茹', '炙甘草', '陈皮']	熄风涤痰	['治风', '祛痰']
加味天麻钩藤汤	['钩藤', '天麻', '当归', '赤芍', '桑寄生', '罗布麻叶', '大黄', '胆南星', '栝楼', '地龙', '杜仲', '麦芽', '焦山楂', '神曲']	平肝息风、祛瘀化痰	['治风', '祛痰']
加味天麻钩藤汤	['钩藤', '天麻', '当归', '赤芍', '桑寄生', '罗布麻叶', '大黄', '胆南星', '栝楼', '地龙', '杜仲', '麦芽', '焦山楂', '神曲']	化痰息风、平肝、祛瘀	['治风', '祛痰']
加减羚羊角汤	['羚羊角', '龟甲', '牡丹皮', '白芍', '石决明', '菊花', '玄参', '菖蒲', '川贝母', '胆南星', '蝉蜕', '甘草']	平肝潜阳、透窍豁痰	['治风', '祛痰']
加味导痰汤	['陈皮', '半夏', '茯苓', '枳实', '胆南星', '蝉蜕', '郁金', '菖蒲', '天麻', '钩藤', '甘草']	平肝熄风、透窍豁痰	['治风', '祛痰']
三化汤	['厚朴', '大黄', '枳实', '羌活']	祛风行滞化痰	['治风', '祛痰']
加味羚角钩藤汤	['羚羊角', '钩藤', '生地黄', '茯苓', '葛根', '白芍', '蔓荆子', '菊花', '平贝母', '竹茹', '菖蒲', '郁金', '甘草']	平肝潜阳、化痰熄风	['治风', '祛痰']
定痫丸	['茯苓', '茯神', '川贝母', '天麻', '丹参', '麦冬', '陈皮', '远志', '菖蒲', '半夏', '胆南星', '全蝎', '僵蚕', '琥珀', '竹沥', '甘草']	涤痰熄风	['治风', '祛痰']
涤痰汤	['半夏', '天南星', '陈皮', '枳实', '茯苓', '人参', '菖蒲', '竹茹', '甘草', '生姜']	豁痰熄风	['治风', '祛痰']
辛开苦降法	['附子', '细辛', '黄连', '大黄', '生龙骨', '生牡蛎', '当归', '蜈蚣', '甘草']	辛开苦降、祛痰熄风	['治风', '祛痰']
化痰熄风止晕汤	['半夏', '茯苓', '陈皮', '白术', '天麻', '全蝎', '炙甘草', '大枣', '生姜', '蜈蚣']	化痰止呕、熄风止晕	['治风', '祛痰']
半夏白术天麻汤	['白术', '天麻', '陈皮', '茯苓']	化痰熄风止眩	['治风', '祛痰']
竹沥达痰丸加减	['大黄', '黄芩', '竹沥', '半夏', '陈皮', '茯苓', '郁金', '菖蒲', '龙骨', '六月雪', '茯苓']	化痰熄风、解毒泄浊	['治风', '祛痰', '痈疡']
聂杰辉经验方	['红花', '白芍', '当归', '黄柏', '丹参', '苍术', '牛膝', '茯苓', '玄参', '赤芍', '金银花']	行气消瘀、软坚散结、祛风除湿	['治风', '祛痰', '祛湿', '理气']
活血平肝方	['丹参', '川芎', '桃仁', '红花', '赤芍', '珍珠母', '牛膝', '黄芩', '黑山栀', '夏枯草']	平肝潜阳、活血祛瘀	['治风', '祛痰', '理血']
解语汤	['羌活', '防风', '天麻', '肉桂', '川芎', '南星', '当归', '人参', '甘草']	祛风化痰通络	['治风', '祛痰', '理血']
定眩汤	['陈皮', '白术', '半夏', '泽泻', '天麻', '白芍', '川芎', '桃仁', '红花', '柴胡']	熄风化痰、活血祛瘀	['治风', '祛痰', '理血']
刘祖贻经验方	['天麻', '钩藤', '石决明', '珍珠母', '牛膝', '全蝎', '僵蚕', '丹参', '地龙']	平肝潜阳、活血化痰	['治风', '祛痰', '理血']
活血降粘汤	['川芎', '石决明', '天麻', '半夏', '红花', '黄芪', '泽兰', '郁金', '菖蒲', '毛冬青']	化痰活血、熄风通络、降粘抗凝	['治风', '祛痰', '理血']
化痰活血汤	['半夏', '陈皮', '白术', '天麻', '赤芍', '川芎', '桃仁', '红花', '葛根']	化痰熄风、活血化瘀	['治风', '祛痰', '理血']
加味天麻汤	['天麻', '钩藤', '白术', '丹参', '皂角刺', '川芎']	平肝潜阳、熄风化痰、祛瘀通络	['治风', '祛痰', '理血']
脑康汤	['赤芍', '半夏', '白术', '地龙']	活血化瘀、祛痰熄风	['治风', '祛痰', '理血']
化痰活血定眩汤	['半夏', '天麻', '川芎', '水蛭', '陈皮', '白术', '茯苓', '泽泻', '三七', '葛根', '刺五加', '白芷']	活血化痰、熄风定眩	['治风', '祛痰', '理血']
半夏白术天麻汤	['半夏', '白术', '天麻', '陈皮', '茯苓', '甘草', '生姜', '大枣', '蔓荆子']	祛风化痰、活血通络	['治风', '祛痰', '理血']
熄风通络化痰汤	['天麻', '水蛭', '三七', '瓜蒌', '天竺黄', '刺蒺藜', '豨莶草', '鸡血藤', '大黄']	熄风化痰、活血通络	['治风', '祛痰', '理血']
熄风通络涤痰汤	['天麻', '石决明', '全蝎', '水蛭', '川芎', '菖蒲', '胆南星', '牛膝', '瓜蒌']	平肝熄风、化痰通络	['治风', '祛痰', '理血']
通络祛风汤1号	['半夏', '南星', '附子', '天麻', '全蝎', '当归', '鸡血藤', '豨莶草']	祛风化痰通络	['治风', '祛痰', '理血']
真方白丸子汤	['半夏', '附子', '天南星', '川乌', '天麻', '全蝎', '木香', '枳壳', '甘草']	祛风化痰、活血通络	['治风', '祛痰', '理血']
自拟汤	['天麻', '川芎', '地龙', '全蝎', '水蛭', '半夏', '茯苓', '陈皮', '胆南星', '菖蒲', '远志', '桃仁', '红花', '牛膝', '鸡血藤', '丝瓜络', '枸杞子', '龟甲']	祛风化痰、活血通络	['治风', '祛痰', '理血']
化痰通络汤加味	['半夏', '陈皮', '茯苓', '枳实', '川芎', '丹参', '水蛭', '地龙', '菖蒲', '远志', '香附']	熄风化痰、活血通络	['治风', '祛痰', '理血']
菖蒲地龙汤	['菖蒲', '地龙', '鸡血藤', '络石藤', '赤芍', '三七', '防风', '水半夏', '陈皮', '枳壳', '茯苓', '郁金', '僵蚕', '炙甘草']	祛风化痰、活血通络	['治风', '祛痰', '理血']
化痰祛瘀汤	['水蛭', '半夏', '白术', '天麻', '葛根', '赤芍', '大黄']	化痰祛瘀、熄风通络	['治风', '祛痰', '理血']
玉真散	['天麻', '南星', '白芷', '防风', '羌活', '附子']	祛风解痉、化痰通络	['治风', '祛痰', '理血']
复语汤	['天麻', '全蝎', '附子', '胆南星', '半夏', '石菖蒲', '丹参', '当归', '路路通', '水蛭', '川芎']	化痰熄风通络	['治风', '祛痰', '理血']
镇肝熄风复遂汤	['石决明', '代赭石', '牡蛎', '牛膝', '赤芍', '白芍', '半夏', '陈皮', '茯苓', '胆南星', '郁金', '菖蒲', '钩藤', '红花', '桃仁', '桑枝', '全蝎', '穿山甲']	熄风化痰、平肝潜阳、通经活络	['治风', '祛痰', '理血']
熄风化痰活血通络汤	['天麻', '钩藤', '石决明', '栀子', '丹参', '牡蛎', '半夏', '南星', '桑寄生', '葛根', '牛膝', '红花', '鸡血藤', '水蛭', '全蝎']	熄风化痰、活血通络	['治风', '祛痰', '理血']
起瘫复脑汤	['天麻', '钩藤', '川芎', '丹参', '当归', '水蛭', '地龙', '大黄', '栝楼', '胆南星', '竹沥', '黄精', '甘草']	平肝熄风、化痰通络、活血祛瘀	['治风', '祛痰', '理血']
天麻钩藤饮加减	['天麻', '钩藤', '菊花', '川芎', '葛根', '赤芍', '黄芩', '石决明', '牛膝', '红花', '生地黄', '络石藤', '地龙']	平肝潜阳、化痰通络	['治风', '祛痰', '理血']
大秦艽汤加味	['秦艽', '全蝎', '炙甘草', '川芎', '当归', '羌活', '独活', '防风', '黄芩', '白芍', '白芷', '生地黄', '熟地黄', '细辛', '僵蚕', '茯苓', '附子']	祛风化痰通络	['治风', '祛痰', '理血']
化痰通脉汤	['丹参', '黄芪', '红花', '川芎', '当归', '地龙', '水蛭']	化痰祛风通络	['治风', '祛痰', '理血']
祛风通络化痰汤	['天麻', '川芎', '地龙', '全蝎', '水蛭', '半夏', '茯苓', '陈皮', '胆南星', '菖蒲', '远志', '桃仁', '红花', '牛膝', '鸡血藤', '丝瓜络', '枸杞子', '龟甲']	活血祛风、化痰通络	['治风', '祛痰', '理血']
熄风化痰通络汤	['半夏', '天麻', '钩藤', '牛膝', '附子', '刺蒺藜', '僵蚕', '陈皮', '全蝎', '菖蒲', '桃仁', '胆南星', '甘草']	熄风化痰、祛瘀通络	['治风', '祛痰', '理血']
桃红四物汤加减	['当归', '川芎', '白芍', '红花', '香附', '血竭', '竹沥', '生姜', '僵蚕', '桃仁', '羚羊角']	活血祛痰、通经息风	['治风', '祛痰', '理血']
牵正散	['全蝎', '僵蚕', '附子']	祛风止痉、化痰通络	['治风', '祛痰', '理血']
四白牵正散	['川芎', '白芷', '西红花', '僵蚕', '全蝎', '附子', '白薇', '蒲黄', '天麻', '乌梢蛇', '豨莶草', '守宫']	祛风化痰、通络止痛	['治风', '祛痰', '理血']
解语丹	['附子', '石菖蒲', '远志', '天麻', '全蝎', '羌活', '南星']	化痰通络、熄风止痉	['治风', '祛痰', '理血']
加减升降散合候氏黑散	['蝉蜕', '僵蚕', '姜黄', '大黄', '桔梗', '干姜', '菊花', '白术', '牡蛎', '防风', '黄芩', '桂枝', '茯苓', '川芎', '细辛', '矾石', '党参', '当归']	祛风化痰、活血通络	['治风', '祛痰', '理血']
化痰通络汤	['半夏', '茯苓', '白术', '天麻', '胆南星', '天竺黄', '陈皮', '大黄', '丹参']	祛风化痰、活血通络	['治风', '祛痰', '理血']
祛风化痰通络汤	['陈皮', '半夏', '茯苓', '枳实', '竹沥', '胆南星', '天麻', '僵蚕', '全蝎', '地龙', '鸡血藤', '大黄', '甘草', '乌梢蛇']	祛风豁痰、活血化瘀	['治风', '祛痰', '理血']
牵正散	['附子', '僵蚕', '全蝎']	祛风化痰、通络止痉	['治风', '祛痰', '理血']
化痰通络汤	['半夏', '陈皮', '枳壳', '川芎', '红花', '远志', '菖蒲', '茯神', '党参', '丹参', '炙甘草']	化痰熄风通络	['治风', '祛痰', '理血']
温胆汤加味	['半夏', '竹茹', '陈皮', '枳实', '茯苓', '炙甘草', '天麻', '地龙', '川芎', '当归']	祛风化痰、活血通络	['治风', '祛痰', '理血']
半夏白术天麻汤加味	['半夏', '天麻', '陈皮', '茯苓', '白术', '炙甘草', '川芎', '地龙']	祛风化痰、活血通络	['治风', '祛痰', '理血']
平肝涤痰通络汤	['天麻', '钩藤', '石决明', '牛膝', '杜仲', '桑寄生', '半夏', '陈皮', '茯苓', '胆南星', '竹茹', '菖蒲', '当归', '赤芍', '川芎', '桃仁', '红花', '甘草']	平肝熄风、涤痰化瘀	['治风', '祛痰', '理血']
皂贝化痰胶囊	['牙皂', '川贝母', '胆南星', '附子', '天麻', '苏合香', '郁金', '菖蒲', '川芎', '水蛭']	祛风化痰、活血通络	['治风', '祛痰', '理血']
大黄五虫化梗汤	['大黄', '全蝎', '蜈蚣', '地龙', '水蛭', '僵蚕', '丹参', '川芎', '胆南星', '远志']	平肝熄风、化痰通络	['治风', '祛痰', '理血']
资寿解语汤加减	['防风', '附子', '天麻', '天南星', '菖蒲', '羌活', '甘草']	祛风化痰通络	['治风', '祛痰', '理血']
大秦艽汤	['甘草', '川芎', '当归', '石膏', '独活', '白芍', '羌活', '防风', '黄芩', '白芷', '白术', '生地黄', '熟地黄', '茯苓']	疏风通络、活血化痰	['治风', '祛痰', '理血']
田黄活血通络汤	['三七', '大黄酒', '茜草', '蒲黄', '地龙', '川芎', '桃仁', '红花']	凉血止血、祛瘀生新、熄风通络	['治风', '祛痰', '理血']
平肝消瘀化痰汤	['红花', '当归', '生地黄', '川芎', '三七', '牛膝', '天麻', '钩藤', '茯苓', '泽泻', '菖蒲', '天竺黄', '甘草']	平肝消瘀、化痰通络	['治风', '祛痰', '理血']
通络活血汤	['石决明', '海蛤壳', '青黛', '旋覆花', '代赭石', '桑寄生', '威灵仙', '地龙', '穿山甲', '僵蚕', '豨莶草', '竹茹', '鸡血藤', '知母', '黄柏', '蛰虫', '全蝎']	平肝豁痰、活血通络	['治风', '祛痰', '理血']
脑血消	['天麻', '水牛角', '石决明', '钩藤', '生地黄', '牡丹皮', '竹茹', '胆南星', '地龙', '大黄', '三七', '牛膝', '泽泻']	平肝息风、豁痰通络	['治风', '祛痰', '理血']
镇肝复遂汤	['石决明', '牡蛎', '代赭石', '胆南星', '半夏', '陈皮', '茯苓', '钩藤', '全蝎', '桑枝', '红花', '桃仁', '赤芍', '菖蒲', '郁金', '穿山甲', '竹沥']	镇肝熄风、化痰活络	['治风', '祛痰', '理血']
自拟重镇凉血祛瘀方	['龙骨', '牡蛎', '牡丹皮', '白芍', '茜草', '地榆', '侧柏叶', '葛根']	潜阳熄风、凉血祛瘀	['治风', '祛痰', '理血']
化痰通络饮	['半夏', '天麻', '胆南星', '丹参', '香附', '大黄']	祛风化痰、活血通络	['治风', '祛痰', '理血']
祛痰逐瘀汤	['葶苈子', '半夏', '大黄', '茯苓', '丹参', '三七', '天竺黄']	祛痰逐瘀止痉	['治风', '祛痰', '理血']
醒脑化痰汤	['菖蒲', '远志', '郁金', '天麻', '钩藤', '地龙', '僵蚕', '竹茹', '陈皮', '半夏', '茯苓', '丹参', '红花', '赤芍', '牛膝', '薄荷']	祛风化痰、活血化瘀	['治风', '祛痰', '理血']
夏贝菖僵方	['半夏', '茯苓', '平贝母', '天麻', '胆南星', '地龙', '代赭石', '丹参', '川芎', '陈皮', '僵蚕', '菖蒲']	祛风豁痰、化瘀通络	['治风', '祛痰', '理血']
醒脑汤	['珍珠母', '龙骨', '当归', '桃仁', '红花', '紫苏梗', '竹茹', '甘草']	平肝熄风、祛瘀通络	['治风', '祛痰', '理血']
活血降粘汤	['丹参', '何首乌', '草决明', '山楂', '泽泻', '桃仁', '红花', '菊花']	化痰活血、熄风通络、降粘抗凝	['治风', '祛痰', '理血']
牵正散加味	['僵蚕', '茺蔚子', '附子', '栀子仁', '大黄', '丹参', '白芍', '全蝎', '蜈蚣']	祛风化痰、活血定痛	['治风', '祛痰', '理血']
牵正散加味	['全蝎', '僵蚕', '附子', '防风', '荆芥', '赤芍', '桃仁', '红花', '羌活', '白芷', '地龙']	祛风通络、活血化痰	['治风', '祛痰', '理血']
指迷茯苓丸	['芒硝']	祛风化痰通络	['治风', '祛痰', '理血']
解语丹	['天麻', '胆南星', '蜈蚣', '羌活', '远志', '菖蒲', '木香']	化痰通络、熄风止痉	['治风', '祛痰', '理血']
化痰通络汤	['半夏', '白术', '天麻', '胆南星', '天竺黄', '香附', '丹参', '大黄']	化痰熄风通络	['治风', '祛痰', '理血']
醒脑化痰汤	['菖蒲', '远志', '郁金', '天麻', '钩藤', '地龙', '僵蚕', '竹茹', '陈皮', '水半夏', '茯苓', '丹参', '红花', '赤芍', '牛膝', '薄荷']	祛风化痰、活血化瘀	['治风', '祛痰', '理血']
熄风化痰通络汤	['黄芪', '当归', '丹参', '赤芍', '川芎', '地鳖虫', '僵蚕', '地龙', '全蝎', '蜈蚣', '菖蒲', '天竹黄', '天麻', '云苓', '郁金', '制马前子', '甘草', '胆南星']	祛风活血、化痰通络	['治风', '祛痰', '理血']
逐瘀祛痰汤	['天南星', '天麻', '天竺黄', '僵蚕', '全蝎', '蜈蚣', '茯苓', '鸡血藤', '桑寄生', '桑葚子', '杜仲', '炙甘草']	化痰通络息风	['治风', '祛痰', '理血']
止痫汤	['煅青礞石', '天麻', '钩藤', '胆南星', '炙全蝎', '炙蜈蚣', '水蛭', '当归', '僵蚕']	熄风止痉、豁痰逐瘀	['治风', '祛痰', '理血']
加味佛手散	['当归', '川芎', '丹参', '穿山甲', '地龙', '路路通']	活血化瘀、化痰止痉	['治风', '祛痰', '理血']
痰痫汤	['丹参', '首乌藤', '珍珠母', '川芎', '半夏', '地龙', '僵蚕', '红花', '胆南星']	化痰通络、平肝熄风	['治风', '祛痰', '理血']
定痫豁痰汤	['天麻', '钩藤', '僵蚕', '地龙', '胆南星', '茯苓', '当归', '白芍', '郁金', '陈皮']	熄风定痫、豁痰活血	['治风', '祛痰', '理血']
解语丹	['附子', '石菖蒲', '远志', '天麻', '全蝎', '羌活', '南星', '木香', '龙眼肉']	化痰通络、熄风止痉	['治风', '祛痰', '理血']
解语丹加减	['天麻', '附子', '胆南星', '全蝎', '羌活', '远志', '菖蒲', '木香', '丹参', '红花', '鸡血藤']	祛风化痰、活血通络	['治风', '祛痰', '理血']
活血潜降汤	['川牛膝', '钩藤', '丹参', '益母草', '桑寄生', '川贝母', '生地黄', '山药', '泽泻', '枸杞子', '制附', '茶叶']	活血祛瘀、平肝潜阳	['治风', '祛痰', '理血']
祛风化痰脑络通方	['水蛭', '生南星', '地鳖虫', '地龙', '黄芪', '茜草', '川芎', '三七', '天麻', '川牛膝', '甘草']	祛风化痰、活血通络	['治风', '祛痰', '理血']
加味四虫汤	['炙僵蚕', '地龙', '全蝎', '蜈蚣', '天麻', '钩藤']	平肝熄风、通络化痰	['治风', '祛痰', '理血']
愈风通络汤	['天麻', '钩藤', '胆南星', '降香', '水蛭', '蜈蚣', '大黄', '白芍', '制首乌']	熄风活血、化痰通络	['治风', '祛痰', '理血']
真方白丸子	['附子', '天南星', '天麻', '川乌', '全蝎', '木香', '枳壳']	祛风化痰通络	['治风', '祛痰', '理血']
青州白丸子	['胆南星', '半夏', '川乌', '附子']	祛风化痰、温经通络	['治风', '祛痰', '理血', '温里']
三生饮	['胆南星', '川乌', '附子', '木香', '生姜']	温阳化痰、祛风通络	['治风', '祛痰', '理血', '温里']
三虫逐瘀胶囊	['水蛭', '蜈蚣', '地龙', '红花', '川芎', '枳壳', '黄芪']	活血祛瘀、行气通络、熄风解痉	['治风', '祛痰', '理血', '理气']
中风先兆丸	['太子参', '何首乌', '水蛭', '全蝎', '天麻', '胆南星', '大黄', '决明子']	益气逐瘀、化痰熄风	['治风', '祛痰', '理血', '理气']
益气活血熄风化痰方	['炙黄芪', '茯苓', '当归', '党参', '葛根', '天麻', '半夏', '桃仁', '红花', '桔梗', '菖蒲', '丹参', '瓜蒌', '玉竹', '决明子', '赤芍', '山茱萸']	益气活血、熄风化痰	['治风', '祛痰', '理血', '理气']
清灵定眩汤	['半夏', '茯苓', '天麻', '白术', '党参', '菖蒲', '刺蒺藜']	益气活血、熄风涤痰	['治风', '祛痰', '理血', '理气']
理气反正汤	['珍珠母', '沉香', '乌药', '刺蒺藜', '佛手', '丹参', '桑枝', '青皮', '胆南星', '郁金']	理气止痛、化痰祛风	['治风', '祛痰', '理血', '理气']
五虫熄风汤	['全蝎', '土鳖虫', '僵蚕', '地龙', '龟甲', '乌梅', '丹参', '菖蒲', '葛根']	熄风搜络、活血祛痰、化瘀散结	['治风', '祛痰', '理血', '理气']
桃芍化瘀通络汤	['赤芍', '天麻', '川芎', '桃仁', '地龙', '牛膝', '木瓜', '红花', '全蝎', '甘草', '黄芪', '葛根', '当归']	益气活血、祛痰、熄风通络	['治风', '祛痰', '理血', '理气']
中风灵颗粒	['太子参', '制首乌', '水蛭', '全蝎', '决明子', '胆南星', '大黄', '天麻']	益气逐瘀、化痰熄风	['治风', '祛痰', '理血', '理气']
旋覆半夏白术天麻汤	['代赭石', '旋覆花', '半夏', '枳实', '柿蒂', '天麻', '人参', '白术', '云茯苓', '甘草', '生姜', '大枣']	降逆化痰、熄风止眩	['治风', '祛痰', '理气']
温胆化痰汤	['桑叶', '菊花', '竹茹', '蒺藜', '茯苓', '牛膝', '钩藤', '半夏', '枳实', '天麻', '陈皮', '大黄']	平肝清胆、化痰和胃	['治风', '祛痰', '和解']
加用续命汤	['麻黄', '桂枝', '当归', '川芍', '人参', '石膏', '杏仁', '干姜', '甘草']	祛风除湿	['治风', '祛湿']
丁友英经验方	['羌活', '独活', '细辛', '川乌', '草乌', '秦艽', '伸筋草', '薄荷', '红花', '檀香', '五味子']	祛风除湿、	['治风', '祛湿']
复方四虫丸	['全蝎', '蜈蚣', '僵蚕', '穿山甲', '三七', '雄黄']	祛风除湿	['治风', '祛湿']
黄芪桂枝五物汤	['黄芪', '桂枝', '白芍', '生姜', '大枣']	祛风除湿	['治风', '祛湿']
润肠丸	['大黄', '当归', '羌活', '桃仁', '麻仁']	润燥疏风、和血通便	['治风', '祛湿', '治燥', '和解']
润肠丸	['大黄', '当归', '羌活']	润燥疏风、和血通便	['治风', '祛湿', '治燥', '和解']
乌附麻辛桂姜草汤	['制川乌', '制草乌', '制附', '麻黄', '细辛', '桂枝', '生姜', '甘草']	温经散寒、祛风除湿	['治风', '祛湿', '温里']
蠲痹汤	['羌活', '独活', '桂枝', '秦艽', '桑枝', '当归', '川芎', '乳香', '木香', '甘草', '海风藤']	祛风除湿、蠲痹止痛	['治风', '祛湿', '理血']
蠲痹汤	['羌活', '独活', '桂枝', '秦艽', '海风藤', '桑枝', '当归', '川芎', '乳香', '木香', '甘草']	祛风除湿止痛	['治风', '祛湿', '理血']
小防风汤	['防风', '秦艽', '羌活', '附子']	祛风散寒、除湿通络	['治风', '祛湿', '理血', '温里']
桑枝饮子	['桑枝', '黑豆', '独活', '生姜', '羌活']	祛风除湿、散寒通络	['治风', '祛湿', '理血', '温里']
蠲痹汤	['羌活', '独活', '肉桂', '秦艽', '海风藤', '桑枝', '当归', '川芎', '乳香', '木香', '甘草', '细辛']	祛风散寒、除湿通络	['治风', '祛湿', '理血', '温里']
薏苡仁汤	['薏苡仁', '当归', '川芎', '生姜', '桂枝', '羌活', '独活', '防风', '白术', '甘草', '川乌', '麻黄']	祛风除湿、散寒止痛	['治风', '祛湿', '理血', '温里']
三痹汤	['续断', '杜仲', '防风', '桂枝', '细辛', '人参', '茯苓', '当归', '白芍', '甘草', '秦艽', '生地黄', '川芎', '独活', '黄芪', '牛膝']	益气活血、祛风除湿	['治风', '祛湿', '理血', '理气']
二丹饮	['丹参', '牡丹皮', '川芎', '赤芍', '红花', '夏枯草', '牛膝', '钩藤', '豨莶草', '珍珠母']	活血化瘀、平肝熄风	['治风', '理血']
天麻牛膝首乌煎	['天麻', '钩藤', '牛膝', '枣仁', '代赭石', '石决明', '首乌藤', '制首乌', '丹参', '川芎']	平肝潜阳、活血通络	['治风', '理血']
潜阳熄风汤	['天麻', '桑叶', '代赭石', '牡丹皮', '党参', '半夏', '干地黄', '蒲黄', '香附', '柴胡', '磁石', '水蛭', '牡蛎', '红花', '麦冬']	重镇潜阳、活血通络	['治风', '理血']
平肝潜阳方	['玄参', '钩藤', '龙胆草', '夏枯草', '地龙', '枣仁', '石决明', '首乌藤', '川芎', '赤芍', '红花']	平肝潜阳、活血通络	['治风', '理血']
白芍地龙全蝎饮	['白芍', '天麻', '钩藤', '丹参', '蒲黄', '葛根', '枣仁', '山楂', '石决明', '黄芪', '首乌藤', '川芎', '益母草', '地龙', '全蝎']	平肝潜阳、活血通络	['治风', '理血']
眩晕汤	['天麻', '菖蒲', '当归', '泽泻', '半夏', '钩藤', '石决明', '黄芪', '夏枯草', '枸杞子', '菊花', '远志', '甘草']	平肝熄风、化瘀宁神	['治风', '理血']
益气息风活血汤	['天麻', '钩藤', '川芎', '赤芍', '丹参', '桃仁', '红花', '水蛭', '葛根', '地龙', '鸡血藤', '甘草']	平肝熄风、活血通络	['治风', '理血']
四白牵正散	['川芎', '白芷', '西红花', '僵蚕', '全蝎', '附子', '白薇', '蒲黄', '天麻', '乌梢蛇', '豨莶草']	祛风通络	['治风', '理血']
潜阳熄风煎	['羚羊角', '天竺黄', '玳瑁', '珍珠母', '紫贝齿', '龟甲', '僵蚕', '葛根', '槐花', '生地黄', '胆南星', '秦艽']	平肝潜阳、熄风通络	['治风', '理血']
天龙息风汤	['天麻', '钩藤', '牛膝', '地龙', '白芍', '丹参', '石决明', '甘草']	平肝息风、活血化瘀	['治风', '理血']
救瘫灵	['乌梢蛇', '僵蚕', '全蝎', '蜈蚣', '地龙', '水蛭', '蛰虫', '木鳖子', '赤芍', '当归', '黄芪', '淫羊藿']	息风通络、活血化瘀	['治风', '理血']
熄风活血定痛汤	['川芎', '赤芍', '全蝎', '蜈蚣', '蝉蜕', '白芷', '刺蒺藜', '蔓荆子', '地龙', '防风']	平肝熄风、活血化瘀	['治风', '理血']
凉血熄风化瘀方	['大黄', '郁金', '牡丹皮', '玄参', '丹参', '当归', '地龙', '天麻', '生地黄', '钩藤', '黄芪', '水牛角']	凉血、熄风、化瘀	['治风', '理血']
潜阳熄风汤	['代赭石', '菖蒲', '磁石', '石膏', '石决明', '郁金', '水半夏', '半夏', '珍珠母', '地龙', '牛膝']	镇肝潜阳、熄风活络	['治风', '理血']
调肝活血汤	['天麻', '钩藤', '川芎', '僵蚕', '石决明', '丹参', '桑寄生', '牛膝', '黄芩', '杜仲', '栀子', '首乌藤', '茯神', '甘草']	平肝熄风、调气活血	['治风', '理血']
逐瘀平肝汤	['半枝莲', '水蛭', '僵蚕', '菖蒲', '夏枯草', '钩藤', '黄芩', '白芍']	逐瘀泄毒、平肝潜阳	['治风', '理血']
平肝熄风饮	['牛膝', '生地黄', '代赭石', '白芍', '大黄', '茜草', '蒲黄', '钩藤', '墨旱莲', '珍珠母']	平肝熄风、凉血化瘀	['治风', '理血']
宁血除痛汤	['仙鹤草', '钩藤', '大黄', '茜草', '石决明', '延胡索', '白芍', '蒲黄', '川芎', '三七']	平肝潜阳、活血止血	['治风', '理血']
解痉汤	['葛根', '白芍', '赤芍', '夏枯草', '僵蚕', '地龙', '全蝎', '羚羊角', '钩藤', '龙骨', '牡蛎', '生地黄', '牡丹皮', '陈皮', '茯苓', '大黄']	熄风止痉、凉血散瘀	['治风', '理血']
宁血除痛汤	['仙鹤草', '钩藤', '大黄', '石决明', '延胡索', '白芍', '蒲黄', '川芎', '三七']	平肝潜阳、活血止血	['治风', '理血']
中风平肝汤	['钩藤', '菊花', '蒺藜', '川芎', '土鳖虫', '水蛭', '珍珠母', '丹参']	平肝潜阳、化瘀止血	['治风', '理血']
平肝宁血汤	['龙胆草', '栀子', '仙鹤草', '钩藤', '石决明', '白芍', '菊花', '川芎', '葛根', '牛膝', '三七', '大黄']	镇肝潜阳、活血通瘀	['治风', '理血']
育阴潜阳醒脑汤	['生地黄', '牛膝', '地龙', '钩藤', '益母草', '石决明', '白芍']	淸热凉血、平肝息风	['治风', '理血']
活血熄风汤	['当归', '川芎', '益母草', '牛膝', '白芍', '葛根', '牡丹皮', '赤芍', '地龙', '天麻', '三七', '羚羊角', '大黄', '甘草']	活血化瘀、熄风止痉	['治风', '理血']
二芍三虫解痉汤	['白芍', '赤芍', '僵蚕', '地龙', '全蝎', '羚羊角', '钩藤', '龙骨', '牡蛎', '生地黄', '牡丹皮', '茯苓', '大黄']	熄风止痉、凉血散瘀、通络止痛	['治风', '理血']
解痉汤	['葛根', '赤芍', '夏枯草', '全蝎', '羚羊角', '钩藤', '龙骨', '生地黄', '牡丹皮', '茯苓', '大黄', '白芍', '僵蚕', '牡蛎', '陈皮', '地龙']	熄风止痉、通络止痛	['治风', '理血']
凉血熄风解痉汤	['益母草', '葛根', '车前子', '僵蚕', '当归', '地龙', '菖蒲', '川芎', '半夏', '天麻', '竹茹', '甘草', '蜈蚣']	凉血熄风、通络解痉	['治风', '理血']
熄风汤	['天麻', '全蝎', '钩藤', '洋金花', '蜈蚣']	熄风通络、解痉止痛	['治风', '理血']
天麻决明汤	['天麻', '石决明', '钩藤', '桑寄生', '僵蚕', '栀子', '生地黄', '牛膝', '牡蛎', '甘草']	熄风通络止痛	['治风', '理血']
通脑逐瘀汤	['苏木', '刘寄奴', '菖蒲', '豨莶草', '鸡血藤', '泽兰', '赤芍', '川芎']	熄风通络止痛	['治风', '理血']
川芎茶调散	['川芎', '白芷', '羌活', '细辛', '薄荷', '荆芥', '防风', '甘草', '清茶', '蜈蚣']	疏风通络止痛	['治风', '理血']
潜阳活血汤加减	['天麻', '钩藤', '石决明', '当归', '白芍', '泽泻', '白术', '茯苓', '郁金', '延胡索', '羌活', '红花', '半夏', '大黄', '柴胡', '田三七']	平肝潜阳、活血化瘀	['治风', '理血']
羚羊角骨汤	['羚羊角', '钩藤', '白芍', '地龙', '石决明', '天竺黄', '杜仲', '牛膝']	平肝熄风、镇肝潜阳、活血化瘀	['治风', '理血']
羚角钩藤汤加减	['羚羊角', '钩藤', '菊花', '夏枯草', '珍珠母', '生地黄', '石决明', '地龙', '牛膝', '赤芍', '僵蚕', '牡丹皮']	平肝潜阳、熄风止痛、活血通络	['治风', '理血']
川芎茶调散	['薄荷', '川芎', '荆芥', '细辛', '防风', '白芷', '羌活', '甘草']	疏风止痛	['治风', '理血']
羌活胜湿汤	['羌活', '独活', '藁本', '防风', '甘草', '蔓荆子', '川芎']	祛风、胜湿、止痛	['治风', '理血']
天麻钩藤饮合镇肝息风汤加减	['天麻', '钩藤', '石决明', '代赭石', '龙骨', '牡蛎', '生地黄', '白芍', '玄参', '龟甲', '天冬', '牛膝', '杜仲', '桑寄生', '黄芩', '栀子', '首乌藤', '茯神']	镇肝息风、舒筋止颤	['治风', '理血']
李秀林经验方	['羚羊角', '珍珠', '玳瑁', '代赭石', '石决明', '生石膏', '生地黄', '玄参', '钩藤', '僵蚕', '菖蒲']	镇肝熄风、潜阳凉血	['治风', '理血']
黄连膏	['黄连', '黄芩', '大黄', '黄蜡', '麻油']	祛风止痒止痛	['治风', '理血']
防风汤	['防风', '甘草', '当归', '赤茯苓', '杏仁', '官桂', '黄芩', '秦艽', '葛根', '麻黄']	疏风活络、宣痹止痛	['治风', '理血']
八仙逍遥散	['防风', '荆芥', '川芎', '甘草', '当归', '黄柏', '苍术', '牡丹皮', '川椒']	祛风胜湿、活络舒筋	['治风', '理血']
羌活胜湿汤	['羌活', '独活', '藁本', '防风', '甘草']	祛风胜湿、活络舒筋	['治风', '理血']
平肝熄风愈延汤	['制马前子', '胆南星', '天竺黄', '郁金', '菖蒲', '半夏', '天麻', '钩藤', '石决明', '牛膝', '白芍', '生龙骨', '牡蛎']	平肝潜阳、熄风通络	['治风', '理血']
风痫汤	['丹参', '大青叶', '珍珠母', '赤芍', '红花', '葛根', '薄荷', '地龙']	活血通络、平肝熄风	['治风', '理血']
卢尚岭经验方	['白芍', '蜈蚣', '代赭石', '玄参', '天冬', '龙骨', '牡蛎', '川楝子', '龟甲', '刺蒺藜']	潜阳熄风、通络止痛、	['治风', '理血']
清上蠲痛汤	['当归', '川芎', '白芷', '细辛', '羌活', '防风', '菊花', '蔓荆子', '苍术', '麦冬', '独活', '甘草', '黄芩', '生姜']	祛风通络止痛	['治风', '理血']
刘氏活血通络法	['丹参', '延胡索', '川芎', '蒲黄', '全蝎', '白芍', '钩藤', '甘草']	活血通络、熄风止痛	['治风', '理血']
刘氏平肝熄风法	['天麻', '钩藤', '石决明', '珍珠母', '白芍', '佛手', '山楂', '丹参']	平肝熄风、活血通络	['治风', '理血']
清上蠲痛汤	['当归', '川芎', '白芷', '细辛', '羌活', '防风', '菊花', '蔓荆子', '苍术', '麦冬', '独活', '甘草', '黄芩']	祛风通络止痛	['治风', '理血']
赤芍3g、川芎3g、桃仁9g、红花9g、老葱3g、生姜9g、大枣7m、麝香016g、黄酒250g、	['赤芍', '川芎', '桃仁', '红花', '老葱', '生姜', '大枣', '麝香', '黄酒']	活血化瘀、熄风通络	['治风', '理血']
芎桂散	['川乌', '川芎', '桂枝', '炙甘草', '干姜']	祛风散寒、温经通络	['治风', '理血', '温里']
息风通脉益脑汤	['菟丝子', '黄芪', '茯苓', '枸杞子', '山茱萸', '山药', '泽泻', '党参', '牡丹皮', '地龙', '红花', '丹参']	熄风养脑、活血通脉	['治风', '理血', '温里']
小续命汤	['麻黄', '防己', '人参', '芍药', '川芎', '桂枝', '制附', '防风', '杏仁', '黄芩', '甘草']	祛风散寒、温经通络	['治风', '理血', '温里']
潜阳熄风汤	['天麻', '桑叶', '代赭石', '牡丹皮', '党参', '半夏', '干地黄', '蒲黄', '香附', '柴胡', '磁石', '水蛭', '牡蛎', '红花', '麦冬']	熄风潜阳、调畅气血	['治风', '理血', '理气']
张氏中风复方	['黄芪', '当归', '柴胡', '天麻', '赤芍', '瓜蒌皮', '红花', '蝉蜕', '地龙', '川芎', '钩藤', '三七', '甘草']	益气活血、平肝息风	['治风', '理血', '理气']
复元通脉汤	['制附', '龟甲', '炙甘草', '黄芪', '红花', '当归', '地龙', '水蛭', '全蝎', '蜈蚣', '白芥子', '冰片']	益气活血、祛风通络	['治风', '理血', '理气']
黄芪虫藤饮	['黄芪', '鸡血藤', '海风藤', '络石藤', '僵蚕', '地龙', '蜈蚣', '全蝎']	益气活血、祛风通络	['治风', '理血', '理气']
补气养血汤	['黄芪', '熟地黄', '何首乌', '桑枝', '党参', '天冬', '麦冬', '当归', '白芍', '秦艽', '牛膝', '黑芝麻', '茯苓', '续断', '菊花', '陈皮', '虎骨', '竹沥']	补养气血、舒筋熄风	['治风', '理血', '理气']
活血定痫方	['黄芪', '当归', '川芎', '赤芍', '桃仁', '红花', '全蝎', '蜈蚣', '菖蒲', '郁金', '地龙']	益气活血、熄风止痉	['治风', '理血', '理气']
四妙勇安汤加减	['玄参', '当归', '银花', '牡丹皮', '黄芪', '白术', '水蛭', '地龙', '川芎', '毛冬青', '丹参', '鸡血藤', '甘草']	益气活血养筋、祛风除痰通络	['治风', '理血', '理气']
川芎汤	['川芎', '白芷', '防风', '当归', '赤芍', '生地黄', '羌活', '陈皮', '蔓荆子', '花粉', '香加皮']	行气活血祛风通络	['治风', '理血', '理气']
槐花散	['槐花', '侧柏叶', '荆芥', '枳壳']	清肠止血、疏风行气	['治风', '理血', '理气']
陈夏六君子汤	['人参', '白术', '陈皮', '茯苓', '半夏', '甘草', '生姜', '竹沥', '钩藤']	利气去痰、疏风理睥、和胃活络	['治风', '理血', '和解']
安脑平冲汤	['生龙骨', '生牡蛎', '牛膝', '黑山栀', '大黄', '黄芩', '钩藤', '青木香', '泽泻', '蝉蜕', '柴胡', '甘草']	镇肝熄风、平冲降逆、宁血安脑	['治风', '理气']
安脑平冲汤	['龙骨', '牡蛎', '牛膝', '栀子', '大黄', '黄芩', '钩藤', '木香', '泽泻', '蝉蜕', '柴胡', '甘草']	镇肝息风、平冲降逆、宁血安脑	['治风', '理气']
镇肝降逆汤	['代赭石', '天麻', '茯苓', '陈皮', '竹茹', '柿蒂', '郁金', '枳实', '沉香']	镇肝降逆	['治风', '理气']
降逆清胃汤	['代赭石', '丁香', '柿蒂', '旋覆花', '半夏', '竹茹', '栀子', '大黄']	平肝镇逆、清胃止呃	['治风', '理气']
天麻钩藤饮加减	['天麻', '牛膝', '杜仲', '益母草', '钩藤', '石决明', '代赭石', '桑寄生', '茯神', '首乌藤', '黄芩', '栀子']	平肝潜阳、降气疏络	['治风', '理气']
疏肝潜阳汤	['玄参', '香附', '延胡索', '黄精', '平贝母', '白芍', '天竺黄', '半夏', '大枣', '丹参', '玉竹', '生龙骨', '生牡蛎', '山药']	疏肝潜阳	['治风', '理气']
菊楂六味方	['熟地黄', '山茱萸', '山药', '泽泻', '茯苓', '牡丹皮', '枸杞子', '山楂', '菊花', '丹参', '天麻', '女贞子']	滋阴补肾、平肝潜阳、养血熄风	['治风', '补益']
大定风珠	['白芍', '阿胶', '龟甲', '干地黄', '火麻仁', '五味子', '牡蛎', '麦冬', '炙甘草', '鸡子黄', '鳖甲']	滋阴养血、熄风潜阳	['治风', '补益']
李氏加味建瓴汤	['生地黄', '白芍', '麦冬', '阿胶', '牡蛎', '龙骨', '鳖甲', '龟甲', '炙甘草', '胆南星', '菖蒲']	滋阴潜阳	['治风', '补益']
建瓴汤加减	['牛膝', '龙骨', '牡蛎', '白芍', '赭石', '生地黄', '麦冬', '柏子仁', '怀山药']	滋养肝肾、平肝潜阳	['治风', '补益']
济肝汤	['钩藤', '菊花', '天麻', '石决明', '栀子', '牛膝', '枸杞子', '生地黄', '制首乌', '女贞子', '夏枯草', '白芍', '当归', '山茱萸']	滋补肝肾、平肝潜阳	['治风', '补益']
菊花生地饮	['菊花', '生地黄', '女贞子', '夏枯草', '白芷', '枸杞子', '刺蒺藜', '牡蛎', '佛手']	滋阴、补肝、补肾、潜阳、止眩晕	['治风', '补益']
建瓴汤	['怀山药', '牛膝', '代赭石', '龙骨', '牡蛎', '怀地黄', '白芍', '柏子仁']	滋阴养血、平肝熄风	['治风', '补益']
柴守方经验方	['鳖甲', '龟甲', '钩藤', '天麻', '牛膝', '山茱萸', '鹿衔草', '首乌藤', '白芍']	育阴潜阳、平肝熄风	['治风', '补益']
滋生青阳汤	['生地黄', '白芍', '牡丹皮', '麦冬', '石斛', '天麻', '菊花', '石决明', '柴胡', '桑叶', '薄荷', '磁石']	滋阴熄风、平肝潜阳	['治风', '补益']
镇肝熄风汤加味	['白芍', '天冬', '玄参', '枸杞子', '龙骨', '牡蛎', '龟甲', '代赭石', '牛膝', '当归', '天麻', '钩藤', '麦芽', '川楝子', '甘草']	平肝潜阳、滋阴熄风	['治风', '补益']
大定风珠	['白芍', '阿胶', '龟甲', '干地黄', '麻仁', '五味子', '牡蛎', '麦冬', '炙甘草', '鸡子黄', '鳖甲']	滋液息风、滋阴潜阳	['治风', '补益']
滋阴祛痰汤	['石决明', '牡蛎', '代赭石', '钩藤', '菊花', '龟甲', '牛膝', '白芍', '玄参', '胆南星', '天麻', '菖蒲', '川贝母']	滋阴熄风、平肝潜阳	['治风', '补益']
祛痰平肝汤	['钩藤', '泽泻', '川芎', '海藻', '天麻', '葛根', '白菊花', '莱菔子', '丹参', '草决明', '三七', '菖蒲', '郁金', '枸杞子', '黄精']	平肝熄风、滋补肝肾	['治风', '补益']
大定风珠汤	['生地黄', '白芍', '麦冬', '阿胶', '龟甲', '鳖甲', '麻仁', '五味子', '炙甘草', '鸡子黄']	滋阴润筋、熄风镇痉	['治风', '补益']
一甲复脉汤	['炙甘草', '干地黄', '白芍', '麦冬', '阿胶', '牡蛎']	滋阴熄风	['治风', '补益']
镇肝熄风汤	['牛膝', '代赭石', '龙骨', '牡蛎', '龟甲', '白芍', '玄参', '天冬', '川楝子', '麦芽', '茵陈', '甘草']	镇肝熄风、滋阴潜阳	['治风', '补益']
育阴平逆汤	['生地黄', '麦冬', '黄精', '沉香', '羚羊角', '玳瑁', '草决明', '莱菔子', '车前子', '玄参', '白芍']	育阴潜阳、镇逆平冲	['治风', '补益']
加减镇肝熄风汤	['牛膝', '代赭石', '龙骨', '牡蛎', '乌梅', '龟甲', '玄参', '天冬', '黄芩', '茵陈', '天麻']	滋阴熄风、镇肝潜阳	['治风', '补益']
滋肝补肾方	['牛膝', '白芍', '天冬', '麦芽', '玄参', '川楝子', '茵陈', '龟甲', '桑椹', '生地黄', '山楂', '甘草']	滋养肝肾、潜阳熄风	['治风', '补益']
镇肝熄风汤	['代赭石', '牛膝', '龙骨', '牡蛎', '龟甲', '白芍', '玄参', '天冬', '枳实', '茵陈', '麦芽', '甘草']	滋阴潜阳、镇肝熄风	['治风', '补益']
阿胶鸡子黄汤	['阿胶', '白芍', '石决明', '钩藤', '生地黄', '炙甘草', '牡蛎', '络石藤', '茯神木', '鸡子黄']	养血滋阴、柔肝熄风	['治风', '补益']
降肝汤	['羚羊角', '石决明', '生地黄', '白芍', '炙甘草', '地龙', '竹茹', '黄芩', '牡丹皮', '郁金', '钩藤']	平肝潜阳、滋阴熄风	['治风', '补益']
育阴熄风汤	['生地黄', '玄参', '白芍', '女贞子', '桑寄生', '丹参', '钩藤']	育阴熄风	['治风', '补益']
熄风汤	['党参', '代赭石', '熟地黄', '山茱萸', '白芍', '附子', '龙骨', '牡蛎']	滋阴潜阳熄风	['治风', '补益']
大补元煎加减	['熟地黄', '鳖甲', '白芍', '牛膝', '僵蚕', '山茱萸', '杜仲', '麦冬', '菖蒲', '郁金', '枸杞子', '五味子', '全蝎', '蜈蚣']	滋肾柔肝、熄风定搐	['治风', '补益']
填精稳步汤	['熟地黄', '山茱萸', '龟甲', '鳖甲', '知母', '牡丹皮', '麦冬', '白芍', '枸杞子', '杜仲', '桑寄生', '牛膝', '牡蛎']	滋肾填精、柔肝熄风	['治风', '补益']
镇肝熄风汤化裁	['牛膝', '龙骨', '牡蛎', '龟甲', '菊花', '珍珠母', '玄参', '天冬', '钩藤', '蒺藜', '石见穿', '莪术']	镇肝熄风、滋阴潜阳	['治风', '补益']
大定风珠	['白芍', '生地黄', '麦冬', '莲子心', '火麻仁', '五味子', '龟甲', '牡蛎', '甘草', '鳖甲', '阿胶', '鸡子黄']	滋阴熄风	['治风', '补益']
大定风珠	['白芍', '干地黄', '麦冬', '麻仁', '五味子', '生龟甲', '生牡蛎', '甘草', '鳖甲', '阿胶', '鸡子黄']	滋阴熄风、	['治风', '补益']
杞菊地黄汤合三甲复脉汤加减	['枸杞子', '菊花', '熟地黄', '大枣', '茯苓', '山药', '白芍', '牛膝', '龟甲', '鳖甲', '牡蛎', '钩藤', '葛根', '丹参', '泽泻']	滋肾平肝、育阴潜阳	['治风', '补益']
东坡四神丹	['羌活', '玄参', '当归', '熟地黄']	养阴熄风	['治风', '补益']
加减建瓴汤	['生地黄', '白芍', '枸杞子', '石决明', '牡蛎', '龙骨', '柏子仁', '菊花', '钩藤']	滋阴潜阳	['治风', '补益']
大定风珠加减	['龟甲', '鳖甲', '牡蛎', '钩藤', '阿胶', '枸杞子', '熟地黄', '生地黄', '白芍', '麦冬', '麻仁', '人参', '山药', '茯苓', '五味子', '甘草']	填精补髓、育阴息风	['治风', '补益']
续命汤	['麻黄', '防风', '石膏', '黄芩', '干地黄', '川芎', '当归', '甘草', '杏仁', '桂枝']	祛风扶正	['治风', '补益']
小续命汤	['麻黄', '桂枝', '防风', '防己', '杏仁', '黄芩', '人参', '甘草', '大枣', '川芎', '白芍', '附子', '生姜']	祛风扶正	['治风', '补益']
建瓴汤	['怀山药', '牛膝', '代赭石', '生龙骨', '生牡蛎', '怀地黄', '白芍', '柏子仁']	滋水涵木、育阴潜阳	['治风', '补益']
张海岑育阴平肝法	['生地黄', '玄参', '麦冬', '女贞子', '白芍', '黄精', '夏枯草', '石决明', '枣仁', '柏子仁', '五味子', '首乌藤', '甘草']	滋肾柔肝、育阴潜阳、通心肾	['治风', '补益']
小续命汤	['麻黄', '防己', '人参', '桂枝', '黄芩', '芍药', '甘草', '川芎', '杏仁', '防风', '附子', '生姜']	辛温发散、扶正祛风	['治风', '补益']
镇肝熄风汤	['龙骨', '牡蛎', '代赭石', '白芍', '天冬', '玄参', '龟甲', '牛膝', '茵陈', '麦芽', '甘草']	滋阴潜阳、镇肝熄风	['治风', '补益']
镇肝熄风汤	['牛膝', '代赭石', '生龙骨', '生牡蛎', '生龟甲', '白芍', '玄参', '天冬', '川楝子', '麦芽', '茵陈', '甘草']	镇肝熄风、滋阴潜阳	['治风', '补益']
滋阴熄风愈延汤	['制马前子', '胆南星', '天竺黄', '菖蒲', '郁金', '白芍', '生地黄', '天冬', '生龙骨', '生牡蛎', '牛膝', '代赭石', '当归', '土党参']	滋阴熄风	['治风', '补益']
大定风珠	['白芍', '阿胶', '生龟甲', '干地黄', '麻仁', '五味子', '生牡蛎', '麦冬', '炙甘草', '鸡子黄', '鳖甲']	滋阴熄风	['治风', '补益']
龙牡柴桂汤	['生龙骨', '牡蛎', '白芍', '党参', '茯苓', '桂枝', '半夏', '柴胡', '生姜', '大枣', '黄芩', '大黄', '菖蒲', '远志', '甘草']	熄风止痉、育阴潜阳	['治风', '补益']
三甲复脉汤	['山药', '龙骨', '白芍', '钩藤', '僵蚕', '牛膝', '牡蛎', '柏子仁', '桑枝', '牡丹皮', '代赭石', '生地黄', '石膏']	滋阴潜阳	['治风', '补益']
清脑降压汤	['珍珠母', '石决明', '何首乌', '白菊花', '钩藤']	平肝熄风、育阴潜阳	['治风', '补益']
加味牛膝汤加减	['生龙骨', '生牡蛎']	滋补肝肾、育阴潜阳	['治风', '补益']
葛地枣丹汤	['熟地黄', '山药', '天麻', '钩藤', '山茱萸', '茯苓', '葛根', '罗布麻叶', '地龙', '牡丹皮']	滋阴潜阳、	['治风', '补益']
养血清脑汤加味	['当归', '川芎', '白芍', '熟地黄', '钩藤', '鸡血藤', '夏枯草', '决明子', '珍珠母', '延胡索', '菊花', '地龙', '天麻']	补血养肝、滋肾平肝、熄风潜阳养血	['治风', '补益']
丁书文经验一方	['天麻', '钩藤', '天冬', '白芍', '玄参', '龟甲', '石决明', '生地黄', '牛膝', '桑寄生', '夏枯草']	平肝潜阳、滋阴补肾、	['治风', '补益']
柔肝熄风汤	['枸杞子', '菊花', '夏枯草', '桑寄生', '刺蒺藜', '当归', '牛膝', '钩藤', '珍珠母', '赤芍', '白芍']	平肝潜阳、柔肝息风	['治风', '补益']
滋阴平肝潜阳汤	['生地黄', '北沙参', '枸杞子', '当归', '麦门冬', '夏枯草', '草决明', '豨莶草', '益母草', '生龙骨', '甘草']	滋阴平肝潜阳	['治风', '补益']
莲椹汤	['莲须', '桑椹', '女贞子', '墨旱莲', '山药', '龟甲', '牛膝']	滋阴潜阳、滋肝养肾	['治风', '补益']
柔肝熄风定眩汤	['当归', '白芍', '枸杞子', '菊花', '天麻', '钩藤', '僵蚕', '地龙', '葛根', '川牛膝']	柔肝熄风定眩、	['治风', '补益']
磁珠特降胶囊	['代赭石', '夏枯草', '半夏', '磁石', '珍珠母', '琥珀', '地龙', '制首乌']	滋阴潜阳、滋肝养肾、	['治风', '补益']
滋阴平肝降压汤	['熟地黄', '山茱萸', '山药', '茯苓', '牡丹皮', '泽泻', '枸杞子', '菊花', '天麻', '石决明', '生龙骨', '生牡蛎', '钩藤', '川牛膝', '夏枯草', '杜仲', '罗布麻叶']	滋阴平肝降压	['治风', '补益']
菊藤珍草汤	['菊花', '钩藤', '珍珠母', '夏枯草', '生牡蛎', '石决明', '磁石', '泽泻', '茯苓', '桑寄生', '葛根', '牛膝']	滋肾平肝潜阳	['治风', '补益']
糖梗1号方	['黄芪', '党参', '茯苓', '熟地黄', '牛膝', '菟丝子', '五味子', '枸杞子', '天麻', '钩藤', '石决明', '川芎', '红花', '菖蒲', '僵蚕', '当归']	补气养血、滋阴潜阳	['治风', '补益']
脉安宁合剂	['白芍', '麦冬', '五味子', '桑寄生', '仙灵脾', '石决明', '当归', '太子参', '地龙', '全蝎', '钩藤']	养血息风、祛风搜风	['治风', '补益']
王翘楚经验方	['羚羊角', '天麻', '钩藤', '生龙骨', '牡蛎', '石决明', '磁石', '赤芍', '白芍', '菊花', '枸杞子', '生地黄', '知母', '麦冬', '五味子', '山萸肉', '怀山药', '牡丹皮', '制首乌', '北沙参', '石斛']	平肝熄风、滋阴潜阳	['治风', '补益']
星蒌承气汤	['栝楼', '胆南星', '菖蒲', '地龙', '丹参', '郁金', '枳壳', '厚朴', '大黄']	滋阴潜阳、镇肝熄风	['治风', '补益']
四路开窍方	['胆南星', '半夏', '天竺黄', '大黄', '枳壳', '两面针', '地龙', '丹参', '土三七', '五指毛桃', '菖蒲']	滋阴潜阳、镇肝熄风	['治风', '补益']
建瓴汤	['牛膝', '山药', '代赭石', '龙骨', '牡蛎', '柏子仁', '白芍']	滋补肝肾、平肝潜阳	['治风', '补益']
左归丸	['熟地黄', '菟丝子', '牛膝', '龟甲', '鹿角胶', '山药', '山茱萸', '枸杞子']	滋阴补肾、镇肝熄风	['治风', '补益']
镇肝熄风汤	['牛膝', '代赭石', '生龙骨', '生牡蛎', '生龟甲', '白芍', '玄参', '天冬', '川楝子', '麦芽', '茵陈', '甘草']	滋阴潜阳、镇肝熄风	['治风', '补益']
四物汤	['熟地黄', '当归', '白芍', '川芎']	养血柔筋、润燥祛风	['治风', '补益', '治燥']
八风汤	['防风', '芍药', '茯苓', '黄芪', '独活', '当归', '人参', '干姜', '炙甘草', '大豆', '附子']	温气补血、祛风除湿	['治风', '补益', '祛湿']
卢尚岭经验方	['白芍', '牛膝', '玄参', '枸杞子', '石决明', '龟甲', '川楝子', '茵陈蒿', '麦芽', '车前子', '淫羊藿', '泽泻', '益母草']	补益肝肾、潜阳利水	['治风', '补益', '祛湿']
舒络定眩汤	['制首乌', '葛根', '天麻', '牛膝', '丹参', '益智仁', '龟甲', '龙齿', '女贞子', '墨旱莲', '磁石', '大枣']	养阴潜阳、舒络止痛、熄风定眩	['治风', '补益', '理血']
通络活血汤	['石决明', '海蛤壳', '青黛', '旋覆花', '代赭石', '桑寄生', '威灵仙', '地龙', '穿山甲', '僵蚕', '豨莶草', '竹茹', '鸡血藤', '知母', '全蝎']	育阴平肝、活血通络	['治风', '补益', '理血']
回春汤	['黄芪', '杜仲', '当归', '丹参', '川贝母', '赤芍', '桃仁', '红花', '牛膝', '胆南星', '水蛭', '全蝎', '僵蚕', '地龙', '蜈蚣', '升麻', '桂枝', '甘草', '通草']	补益肝肾、熄风通络、活血化瘀	['治风', '补益', '理血']
大秦艽汤加减	['黄芪', '丹参', '川芎', '生地黄', '鸡血藤', '秦艽', '羌活', '白芍', '威灵仙', '广地龙', '全蝎', '蜈蚣']	祛风通络、养血活营	['治风', '补益', '理血']
补气活血饮	['当归', '阿胶', '川芎', '丹参', '牛膝', '黄芪', '枸杞子', '天麻', '胆南星', '络石藤']	补气活血、熄风止痉	['治风', '补益', '理血']
天龙复步汤	['女贞子', '墨旱莲', '天麻', '钩藤', '石决明', '牛膝', '丹参', '葛根', '当归', '赤芍', '红花', '桃仁', '地龙', '乌梢蛇']	滋阴息风潜阳通络	['治风', '补益', '理血']
养阴通络汤	['何首乌', '牛膝', '白芍', '牡丹皮', '地龙', '全蝎', '土鳖虫', '珍珠母', '菊花', '乌梢蛇', '鸡血藤', '天麻', '甘草']	滋阴潜阳、熄风通络	['治风', '补益', '理血']
脑脉通汤	['当归', '龙骨', '牡蛎', '白芍', '水蛭', '钩藤', '地龙', '天麻', '桃仁', '红花', '丹参', '黄芪']	平肝潜阳、活血通络、滋阴熄风	['治风', '补益', '理血']
治遂汤	['川芎', '独活', '当归', '白芍', '石膏', '甘草', '秦艽', '羌活', '防风', '白芷', '黄芩', '白术', '茯苓', '生地黄', '熟地黄', '细辛']	祛风养血通络	['治风', '补益', '理血']
益气活血方	['鸡血藤', '太子参', '地龙', '赤芍', '川芎', '牛膝', '防风', '水蛭', '全蝎']	补气活血、祛风通络	['治风', '补益', '理血']
羌活愈风汤	['羌活', '甘草', '防风', '蔓荆子', '川芎', '细辛', '枳壳', '人参', '麻黄', '菊花', '薄荷', '枸杞子', '当归', '知母', '地骨皮', '黄芪', '独活', '杜仲', '白芷', '秦艽', '柴胡', '半夏', '前胡', '厚朴', '熟地黄', '防己', '茯苓', '黄芩', '石膏', '芍药', '生地黄', '苍术', '桂枝']	补益肝肾、祛风通络	['治风', '补益', '理血']
镇肝熄风汤	['牛膝', '代赭石', '龙骨', '牡蛎', '龟甲', '白芍', '天冬', '玄参', '川楝子', '茵陈', '麦芽', '甘草']	滋阴潜阳、平肝熄风通络	['治风', '补益', '理血']
中风1号	['菊花', '钩藤', '石决明', '青葙子', '玄参', '龙胆草', '牛膝', '代赭石', '川楝子', '丹参', '女贞子', '墨旱莲']	平肝益肾、镇逆潜阳、通经活络	['治风', '补益', '理血']
眩晕方	['天麻', '钩藤', '刺蒺藜', '夏枯草', '益母草', '僵蚕', '胆南星', '女贞子', '墨旱莲', '丹参', '虎杖', '地龙', '桑寄生', '牛膝']	滋补肝肾、平肝潜阳、活血通络	['治风', '补益', '理血']
通络复元汤	['丝瓜络', '路路通', '羌活', '穿山甲', '丹参', '水蛭', '柴胡', '菊花', '赤芍', '枸杞子', '西洋参', '甘草']	祛风通络、补气活血	['治风', '补益', '理血']
滋阴起废汤	['龟甲', '白芍', '豨莶草', '地龙', '生地黄', '熟地黄', '肉苁蓉', '丹参', '天麻', '牛膝', '胆南星', '天竺黄', '红花']	补肝益肾、活血化瘀、熄风通络	['治风', '补益', '理血']
天麻钩藤饮加减	['钩藤', '天麻', '熟地黄', '杜仲', '桑寄生', '川芎', '石决明', '茯神', '枸杞子', '菊花', '白芍', '蜈蚣', '地龙']	滋补肝肾、熄风通络	['治风', '补益', '理血']
加味滋阴止血饮	['生地黄', '当归', '白芍', '茯苓', '墨旱莲', '女贞子', '仙鹤草', '珍珠母', '鳖甲']	养肝潜阳、滋阴止血	['治风', '补益', '理血']
大活络丹	['金钱白花蛇', '乌梢蛇', '威灵仙', '两头尖', '草乌', '天麻', '全蝎', '何首乌', '龟甲', '麻黄', '贯仲', '甘草', '羌活', '官桂', '藿香', '乌药', '黄连', '熟地黄', '大黄', '蒸木香', '沉香', '细辛', '赤芍', '没药', '丁香', '乳香', '僵蚕', '天南星', '青皮', '骨碎补', '白豆蔻', '安息香', '黑附子', '黄芩', '茯苓', '香附', '玄参', '白术', '防风', '葛根', '豹骨', '当归', '血竭', '地龙', '水牛角', '麝香', '松脂', '牛黄', '冰片', '人参']	祛风扶正、活络止痛	['治风', '补益', '理血']
解痉汤	['生地黄', '山茱萸', '枸杞子', '白芍', '牛膝', '全蝎', '地龙', '当归', '川芎', '赤芍']	滋补肝肾、熄风止痉、活血通络	['治风', '补益', '理血']
卢尚岭经验方	['白芍', '石决明', '龙骨', '牡蛎', '玄参', '天冬', '川楝子', '益母草', '夏枯草', '菊花', '决明子', '麦芽']	滋阴潜阳、通络明目	['治风', '补益', '理血']
通络活血汤	['黄芪', '白芍', '鸡血藤', '丹参', '当归', '桂枝', '地龙', '川芎', '甘草', '蜈蚣']	补气活血、通络止痛、祛风舒筋	['治风', '补益', '理血']
止痒方	['五味子', '徐长卿', '麦冬', '生地黄', '僵蚕', '乌梢蛇', '当归', '白鲜皮']	养阴活血、祛风止痒	['治风', '补益', '理血']
柔肝熄风汤	['枸杞子', '菊花', '夏枯草', '桑寄生', '刺蒺藜', '当归', '牛膝', '钩藤', '珍珠母', '赤芍', '白芍']	柔肝熄风、活血通络	['治风', '补益', '理血']
小续命汤加减	['麻黄', '防己', '防风', '炙甘草', '杏仁', '大枣', '桂枝', '黄芩', '川芎', '生姜', '白芍', '附子', '党参']	扶正祛风、温经通络	['治风', '补益', '理血', '温里']
滋生青阳汤加减	['天麻', '钩藤', '蒺藜', '干地黄', '山茱萸', '山药', '茯苓', '丹参', '地龙', '豨莶草', '白芍', '鸡血藤', '石决明', '天花粉']	益肾平肝、活血通络、清热润燥	['治风', '补益', '理血', '清热', '治燥']
防风通络丸	['黄芪', '白术', '当归', '生地黄', '麦冬', '天冬', '龟甲', '代赭石', '牛膝', '蜈蚣', '全蝎']	益气通络、滋阴潜阳	['治风', '补益', '理血', '理气']
天龙复步汤	['天麻', '钩藤', '石决明', '牛膝', '丹参', '葛根', '当归', '赤芍', '红花', '桃仁', '地龙', '乌梢蛇']	养血升清益脑、熄风潜阳通络	['治风', '补益', '理血', '理气']
中风3号胶囊	['黄芪', '丹参', '当归', '川芎', '赤芍', '红花', '鸡血藤', '桃仁', '地龙', '蜈蚣']	益气活血、养阴熄风	['治风', '补益', '理血', '理气']
滋阴通络汤	['生地黄', '山茱萸', '石斛', '麦冬', '肉苁蓉', '菖蒲', '茯苓', '地龙', '当归', '远志', '黄芪', '赤芍', '水蛭']	补肾益气、化瘀潜阳	['治风', '补益', '理血', '理气']
止颤平郁汤	['黄芪', '丹参', '当归', '白芍', '生地黄', '熟地黄', '钩藤', '升麻', '川芎', '防风', '全蝎', '细辛', '威灵仙', '甘草', '茯苓']	滋养肝肾、补益气血、平肝熄风、活血通络	['治风', '补益', '理血', '理气']
黄芪赤风汤	['黄芪', '防风', '赤芍']	助阳益气、行滞祛风、活血通络	['治风', '补益', '理血', '理气']
养血清脑颗粒	['当归', '川芎', '白芍', '熟地黄', '钩藤', '鸡血藤', '夏枯草', '决明子', '珍珠母', '延胡索', '细辛']	缓急止痛、养血平肝、活血清脑	['治风', '补益', '理血', '救急']
大秦艽汤	['生地黄', '熟地黄', '羌活', '独活', '秦艽', '川芎', '赤芍', '白芷', '生石膏', '当归', '茯苓', '细辛', '白术', '防己']	祛风通络、养血和营	['治风', '补益', '理血', '和解']
六味地黄丸合天麻钩藤饮加减	['生地黄', '枸杞子', '钩藤', '天麻', '僵蚕', '菖蒲', '地龙', '牡丹皮', '丹参', '泽泻', '珍珠母', '龙齿', '黄连', '首乌藤', '炙甘草']	滋阴潜阳、祛邪通络、宁心祛疲	['治风', '补益', '理血', '安神']
养血熄风汤加减	['熟地黄', '制首乌', '白芍', '黄芪', '当归', '牛膝', '天麻', '桑椹', '钩藤']	益气养血熄风	['治风', '补益', '理气']
熄风敛阳汤	['熟地黄', '砂仁', '刺蒺藜', '羚羊角', '天麻', '钩藤', '牛膝', '龟甲', '麦冬', '白芍', '女贞子']	滋阴敛阳、熄风降逆	['治风', '补益', '理气']
养血熄风汤加减	['西洋参', '白术', '茯苓', '生地黄', '白芍', '赤芍', '川芎', '当归', '甘草', '天麻', '菖蒲', '生龙骨', '生牡蛎']	益气养血、柔肝熄风	['治风', '补益', '理气']
益气平肝汤	['黄芪', '党参', '川芍', '当归', '茯苓', '白术', '炙甘草', '天麻', '钩藤', '龙骨', '牡蛎', '白芍', '柴胡', '麦芽', '防风', '葛根']	补脾益气、平肝潜阳	['治风', '补益', '理气']
木香顺气汤	['木香', '厚朴', '青皮', '陈皮', '益智仁', '茯苓', '泽泻', '半夏', '吴茱萸', '当归', '升麻', '柴胡', '草豆蔻', '苍术', '生姜']	行气平肝、中枢运转、清升浊降、上下宣通、阴阳平衡	['治风', '补益', '理气']
平肝降逆止呃汤加减	['石决明', '代赭石', '党参', '柿蒂', '茯苓', '半夏', '陈皮', '生姜', '大黄']	补益脾肾、平肝和胃、降逆止呃	['治风', '补益', '理气', '和解']
定风丹加味	['钩藤', '蒺藜', '白芍', '甘草', '木瓜', '石楠藤', '玄参', '牡蛎']	养阴熄风、缓急解痉	['治风', '补益', '救急']
三甲复脉汤	['炙甘草', '生地黄', '白芍', '阿胶', '火麻仁', '麦冬', '牡蛎', '鳖甲', '龟甲']	滋阴潜阳、缓急复脉	['治风', '补益', '救急']
急救亡阳汤	['人参', '熟地黄', '山药', '山茱萸', '远志', '炙甘草', '五味子', '菟丝子']	育阴潜阳救逆	['治风', '补益', '救急']
杞菊地黄汤合大定风珠加减	['枸杞子', '菊花', '生地黄', '麦冬', '赤芍', '天麻', '钩藤', '龟甲', '鳖甲', '白芍', '牛膝', '五味子']	滋阴潜阳、调气和血、	['治风', '补益', '和解']
0	['牛膝', '代赭石', '龙骨', '牡蛎', '首乌藤', '龟甲', '白芍', '玄参', '天冬', '茯神', '菖蒲', '郁金', '百合', '紫苏', '麦芽', '甘草']	滋阴潜阳、重镇安神	['治风', '补益', '安神']
镇惊丸	['紫石英', '铁粉', '远志', '轻粉', '茯神', '人参', '琥珀', '滑石', '南星', '龙齿', '蛇黄', '熊胆']	养心安神、熄风潜阳	['治风', '补益', '安神']
镇肝清热安神熄风汤	['琥珀', '玳瑁', '珍珠母', '半夏', '陈皮', '远志', '柏子仁', '合欢花', '合欢花', '薄荷', '钩藤', '黄芩', '天麻', '黑山栀', '朱砂', '茯苓', '甘草']	平肝安神、定志熄风	['治风', '安神']
小柴胡汤	['柴胡', '黄芩', '升麻', '石膏', '金银花', '连翘', '荆芥', '防风', '桔梗', '半夏', '甘草']	和解少阳、解毒透邪	['痈疡']
十一方酒	['土三七', '血竭', '红花', '泽兰', '当归', '乳香', '没药', '制马钱子', '琥珀', '大黄', '桃仁', '川断', '骨碎补', '土鳖虫', '杜仲', '自然铜', '苏木', '无名异', '秦艽', '七叶一枝花']	和营血、消肿痛、收敛生肌	['痈疡']
海螵蛸粉	['海螵蛸']	敛疮生肌	['痈疡']
生肌散	['冰片', '生龙骨', '当归']	敛疮生肌	['痈疡']
九一丹	['石膏', '铅粉', '水银', '雄黄', '火硝', '白矾', '朱砂']	提脓生肌	['痈疡']
拔毒生肌散	['炉甘石', '寒水石', '硼砂', '乳香', '没药', '大黄', '蓖麻子', '麝香']	拔毒生肌	['痈疡']
八宝生肌散	['炉甘石', '石膏', '漂东丹', '龙骨', '轻粉', '铅粉', '白蜡', '寒水石']	生肌收口、	['痈疡']
八宝生肌散	['血竭', '乳香', '没药', '龙骨', '海螵蛸', '儿茶', '象皮', '寒水石', '梅片']	生肌收口、	['痈疡']
七三丹	['石膏', '水银', '白矾', '火硝']	搜脓拔毒、去腐生肌	['痈疡']
八宝丹	['珍珠', '牛黄', '象皮', '琥珀', '龙骨', '轻粉']	生肌敛疮	['痈疡']
提脓散	['红粉', '冰片', '轻粉']	功能提脓、化腐、生肌	['痈疡']
拔毒生肌散	['冰片', '炉甘石', '龙骨', '红粉', '铅丹', '轻粉', '虫白蜡', '石膏']	拔毒生肌	['痈疡']
八宝生肌散	['炉甘石', '石膏', '漂东丹', '龙骨', '轻粉', '铅粉', '白蜡', '寒水石']	生肌收口	['痈疡']
猪蹄汤	['当归', '川芎', '黄芪', '黄连', '黄柏', '大黄', '五倍子', '肉桂']	拔毒生肌收口	['痈疡']
白玉膏	['乳香', '没药', '铅粉', '轻粉', '儿茶']	生肌收口	['痈疡']
生肌散	['石膏', '轻粉', '赤石脂', '铅丹', '龙骨', '血竭', '乳香', '樟脑']	解毒定痛、生肌敛疮	['痈疡']
生肌膏	['制炉甘石', '乳香', '没药']	生肌收口	['痈疡']
红升丹	['朱砂', '雄黄', '水银', '火硝', '白矾', '皂矾']	拔毒去腐、生肌	['痈疡']
拨毒祛腐散	['炙蜈蚣', '玄参', '雄黄', '蜂房', '薄荷', '乳香', '没药', '樟脑', '全蝎', '蝉蜕', '穿山甲', '血竭']	拔毒去腐生肌	['痈疡']
胶七散	['阿胶', '三七']	化瘀止血、解毒祛瘀	['痈疡', '祛痰', '理血']
土鳖虫散	['土鳖虫', '血竭', '川芎', '红花', '当归', '大黄', '白芷']	活血祛瘀生肌	['痈疡', '祛痰', '理血']
归芪散	['黄芪', '当归', '桃仁', '丹参', '白芷', '大黄']	益气活血、祛瘀生肌	['痈疡', '祛痰', '理血', '理气']
涤痰汤加减	['石决明', '瓦楞子', '浙贝母', '牛膝', '半夏', '代赭石', '牡蛎', '菖蒲', '郁金', '薏苡仁', '陈皮', '天南星', '川芎']	化痰解毒、降逆止呕	['痈疡', '祛痰', '理气']
生肌燥湿方	['炉甘石', '冰片', '滑石', '琥珀', '朱砂', '滴乳石', '白糖']	生肌燥湿	['痈疡', '祛湿']
清解三藤汤加减	['黄连', '苍术', '玄参', '丹参', '生地黄', '桃仁', '红花', '桑枝', '黄芪']	化浊解毒、活血通络	['痈疡', '祛湿', '理血']
通脉化瘀汤	['丹参', '黄芪', '川芎', '姜黄', '当归', '赤芍', '桃仁', '地龙', '茯苓', '全蝎', '甘草']	活血通脉、解毒利湿	['痈疡', '祛湿', '理血', '温里']
五磨饮子	['乌药', '沉香', '槟榔', '枳实', '木香']	凉肝熄风、清热解毒	['痈疡', '清热', '治风', '明目']
解毒洗药	['金银花', '蒲公英', '连翘', '黄柏', '苦参', '赤芍', '牡丹皮', '蛰虫', '木芙蓉叶', '甘草']	解毒消肿止痛	['痈疡', '理血']
三七白及汤	['三七', '白及', '大黄', '仙鹤草', '瓦楞子', '枳实', '陈皮', '茯苓', '半夏']	止血、生肌、散瘀	['痈疡', '理血']
活血生肌方	['冰片', '生龙骨', '当归']	活血生肌	['痈疡', '理血']
愈创膏	['虎杖', '草血竭']	活血生肌	['痈疡', '理血']
木耳散	['木耳', '白糖']	活血生肌	['痈疡', '理血']
祛腐生肌散	['乳香', '血竭', '黄连', '儿茶', '马勃', '石膏', '白矾']	活血生肌	['痈疡', '理血']
乳没散	['没药', '乳香', '黄连', '穿山甲']	活血生肌	['痈疡', '理血']
紫草油膏	['紫草', '当归', '生地黄', '白芷', '防风', '乳香', '没药']	凉血解毒、化腐生肌	['痈疡', '理血']
解毒生肌膏	['紫草', '当归', '白芷', '甘草', '乳香', '轻粉']	活血散瘀、消肿止痛、解毒拔脓、祛腐生肌	['痈疡', '理血']
玉红膏	['血竭', '轻粉', '虫白蜡', '麻油']	解毒消肿、生肌止痛	['痈疡', '理血']
复方大黄酊	['大黄', '虎杖', '芒硝', '冰片']	解毒消肿、生肌止痛	['痈疡', '理血']
冰片散	['冰片', '硼砂', '雄黄', '蜜炙柏', '鹿角胶', '白矾', '甘草', '靛花', '黄连', '玄明粉', '鸡内金']	生肌止痛	['痈疡', '理血']
复方石榴皮煎剂	['桂枝', '石榴皮', '泽兰', '苏木', '地耳草', '七叶莲', '宽筋藤']	活血生肌	['痈疡', '理血']
活血解毒经验方	['白花蛇舌草', '赤芍', '黄药子', '川芎', '玄参', '紫草', '牡丹皮', '黄芩', '栀子', '黄连', '丹参', '金银花', '连翘', '青黛', '卷柏']	凉血解毒、活血散瘀	['痈疡', '理血']
解毒活血汤	['连翘', '葛根', '柴胡', '当归', '生地黄', '赤芍', '桃仁', '红花', '枳壳', '甘草']	清浊解毒、活血通脉	['痈疡', '理血', '温里']
肉桂天花粉	['皂角刺', '穿山甲', '天花粉', '白及', '海螵蛸', '芒硝', '白芥子', '黄芪', '石膏', '珍珠', '胆矾', '肉桂', '黄连']	益气活血、托毒生肌	['痈疡', '理血', '理气']
席疮散	['黄芪', '肉桂', '红花', '乳香', '没药']	益气活血、托毒生肌	['痈疡', '理血', '理气']
人参养荣汤	['人参', '黄芪', '白术', '陈皮', '桂枝', '当归', '熟地黄', '白芍', '远志', '茯苓', '五味子', '炙甘草']	凋补气血、托毒生肌	['痈疡', '理血', '理气']
瘀毒清	['大黄', '桃仁', '红花', '赤芍', '水蛭', '土鳖虫', '山慈菇', '大青叶', '莪术', '甘草']	活血化瘀、行气消瘀解毒	['痈疡', '理血', '理气']
清营汤	['犀角', '生地黄', '玄参', '竹叶心', '麦冬', '丹参', '黄连', '金银花', '连翘']	清营解毒、透热养阴	['痈疡', '补益']
养血生肌膏	['青蛙皮', '乳香', '没药', '吴茱萸']	养血生肌	['痈疡', '补益']
八珍汤/八珍丸	['生地黄', '熟地黄', '当归', '川芎', '白术', '茯苓']	补气养血、托里生肌	['痈疡', '补益']
清营汤	['犀角', '生地黄', '玄参', '竹叶心', '麦冬', '银花', '连翘', '黄连', '丹参']	清营解毒、透热养阴	['痈疡', '补益']
解毒通络方	['栀子', '丹参', '黄芪', '天麻', '地龙', '全蝎']	补气养血、解毒通络	['痈疡', '补益', '理血']
脑静脉血栓验方	['水蛭', '虻虫', '连翘', '甘草', '蒲公英', '金银花', '当归', '桃仁', '黄芪']	扶正解毒、破血消癥	['痈疡', '补益', '理血']
当归补血汤	['当归', '黄芪']	补气活血、生肌敛疮	['痈疡', '补益', '理血']
透脓散	['黄芪', '当归', '山甲', '川芎', '皂角']	益气养血、活血解毒	['痈疡', '补益', '理血', '理气']
托里消毒散	['人参', '川芎', '当归', '白芍', '白术', '银花', '茯苓', '白芷', '皂角刺', '甘草', '黄芪', '桔梗']	气血双补、托毒生肌	['痈疡', '补益', '理血', '理气']
益气养阴方合血府逐瘀汤	['桃仁', '红花', '赤芍', '当归', '川芎', '柴胡', '枳壳', '黄芪', '党参', '茯苓', '白花蛇舌草', '半枝莲', '麦冬', '女贞子', '甘草']	益气养阴、活血化瘀、扶正解毒	['痈疡', '补益', '理血', '理气']
化痰通腑饮	['瓜蒌', '胆南星', '大黄', '芒硝']	通腑泻毒	['泻下']
加味泻心汤	['大黄', '黄连', '黄芩', '代赭石', '花蕊石', '海螵蛸']	通腑热泄、平逆行瘀	['泻下']
加味承气汤	['大黄', '芒硝', '枳实', '厚朴', '甘草', '白芍', '黄芩', '葶苈子', '桑白皮']	泻肺通腑	['泻下']
天麻葛根二陈汤	['半夏', '天麻', '葛根', '陈皮', '茯苓', '菊花', '刺蒺藜', '白术', '天竺黄', '大黄', '三七', '丹参', '泽泻', '猪苓', '甘草']	化痰祛瘀、通腑熄风	['泻下', '治风', '祛痰']
通腑豁痰息风汤	['大黄', '厚朴', '枳实', '天南星', '天麻', '钩藤', '丹参', '牛膝', '地龙', '菖蒲', '白芍']	通腑豁痰息风	['泻下', '治风', '祛痰']
天麻钩藤汤合小承气汤与温胆汤加味	['天麻', '钩藤', '首乌藤', '牛膝', '白芍', '云茯苓', '地龙', '丹参', '大黄', '川朴', '枳实', '甘草', '竹茹', '半夏', '陈皮', '栝楼', '莱菔子']	平肝熄风、化痰通腑、活血化瘀	['泻下', '治风', '祛痰', '理血']
加减星萎承气汤	['栝楼', '胆南星', '大黄', '半夏', '陈皮', '地龙', '钩藤', '菖蒲', '郁金', '水蛭', '丹参', '鸡血藤']	化痰通腑、息风通络	['泻下', '治风', '祛痰', '理血']
化瘀通腑、育阴潜阳	['黄连', '陈皮', '半夏', '菖蒲', '生地黄', '天冬', '麦冬', '石斛', '大黄']	化瘀通腑、育阴潜阳	['泻下', '治风', '补益', '理血']
祛风通络化痰汤方	['天竺黄', '僵蚕', '栀子', '川芎', '当归', '黄芩', '黄芪', '栝楼皮', '地龙', '全蝎', '大黄', '防风', '甘草']	祛热化痰、通腑解毒	['泻下', '痈疡', '祛痰']
黄角汤	['水牛角', '大黄']	通腑解毒、凉血定惊	['泻下', '痈疡', '理血']
星蒌承气汤	['瓜蒌', '胆南星', '菖蒲', '地龙', '丹参', '郁金', '枳壳', '厚朴', '大黄']	通里攻下、化痰通腑	['泻下', '祛痰']
通腑祛瘀汤	['大黄', '枳实', '菖蒲', '赤芍', '桃仁', '胆南星', '天竺黄', '芒硝', '三七', '牛膝']	通腑祛瘀、荡涤实热	['泻下', '祛痰']
通腑泄浊汤	['大黄', '枳实', '厚朴', '羌活', '栝楼', '半夏', '防风', '桃仁', '钩藤', '元明粉']	通腑泄浊	['泻下', '祛痰']
大承气汤加味	['大黄', '厚朴', '枳实', '芒硝']	通腑化痰	['泻下', '祛痰']
化痰通腑方	['天麻', '钩藤', '生杜仲', '牛膝', '桃仁', '红花', '川芎', '当归', '全蝎', '蜈蚣', '三棱', '莪术', '麦芽', '焦山楂', '神曲']	化痰通腑、通经活络	['泻下', '祛痰', '理血']
通腑逐瘀散	['大黄', '水蛭', '三七', '牛黄', '麝香', '血竭']	通腑泻下、活血祛瘀	['泻下', '祛痰', '理血']
祛瘀通腑汤	['水蛭', '大黄', '益母草', '泽兰']	活血祛瘀通腑	['泻下', '祛痰', '理血']
温胆汤加味	['半夏', '陈皮', '茯苓', '枳实', '竹茹', '旋覆花', '代赭石', '炙甘草']	理气活血、化痰通腑	['泻下', '祛痰', '理血', '理气']
麻子仁丸	['火麻仁', '杏仁', '白芍', '大黄', '枳实', '厚朴', '当归', '白术']	润肠通便	['泻下', '祛湿']
济川煎	['当归', '牛膝', '肉苁蓉', '泽泻', '升麻', '枳壳']	温肾益精、润肠通便	['泻下', '祛湿', '温里']
血府逐瘀汤加味	['大黄', '当归', '生地黄', '红花', '赤芍', '枳壳', '柴胡', '川芎', '桔梗', '牛膝', '炙甘草', '桃仁', '白术', '人参', '厚朴', '决明子']	活血化瘀、润肠通便	['泻下', '祛湿', '理血']
益气润肠汤	['当归', '黄芪', '虎杖', '玄参', '白术', '杏仁', '桃仁']	益气活血、润肠通便	['泻下', '祛湿', '理血', '理气']
活血利水通脉饮	['泽兰', '泽泻', '茵陈', '水蛭', '三七', '葛根', '菖蒲', '大黄', '白术', '枳实']	活血利水、通腑降气	['泻下', '祛湿', '理血', '理气']
四君子汤加味	['党参', '白术', '茯苓', '枳实', '厚朴', '熟地黄', '肉苁蓉', '桔梗']	益气理气、润肠通便	['泻下', '祛湿', '理气']
五仁汤加味	['陈皮', '杏仁', '桃仁', '柏子仁', '郁李仁', '松子仁']	理气行滞、润肠通便	['泻下', '祛湿', '理气']
通腑泄热汤	['大黄', '芒硝', '枳实', '厚朴', '川芎', '刺蒺藜', '菊花', '钩藤']	通腑泄热	['泻下', '清热']
犀连承气汤	['犀角', '黄连', '生地黄', '大黄', '枳实', '金汁']	清心启闭、通腑泻热	['泻下', '清热']
通腑泻热汤	['栝楼', '胆南星', '菖蒲', '水牛角', '芒硝', '枳壳', '厚朴', '大黄']	通腑泻热	['泻下', '清热']
化痰通腑汤加味	['瓜蒌', '大黄', '芒硝', '胆南星', '陈皮']	通腑泄热	['泻下', '清热']
大承气汤	['大黄', '枳实', '厚朴', '芒硝']	通腑泄热	['泻下', '清热']
栀子金花汤	['栀子', '黄连', '黄芩', '黄柏', '大黄']	通腑泄热	['泻下', '清热']
通腑方	['大黄', '黄芩', '知母']	通腑泄热	['泻下', '清热']
栀子金花汤	['栀子', '黄连', '黄芩', '黄柏', '大黄']	清泻三焦、通腑泄热	['泻下', '清热']
加味桃核承气汤	['桃仁', '桂枝', '甘草', '芒硝', '大黄', '白薇', '瓜蒌']	通腑泻热	['泻下', '清热']
大承气汤	['大黄', '厚朴', '枳实', '芒硝']	通腑泻热、	['泻下', '清热']
凉膈散加减	['大黄', '芒硝', '甘草', '连翘', '黄芩', '栀子', '薄荷']	泻热通腑	['泻下', '清热']
平肝镇痛汤	['天麻', '钩藤', '大黄', '枳实', '白芍', '栝楼', '全蝎', '夏枯草', '菊花', '栀子', '磁石', '牛膝', '甘草']	平肝潜阳、通腑泻热	['泻下', '清热', '治风']
羚角承气汤	['羚羊角', '钩藤', '石决明', '龙胆草', '大黄', '枳实', '玄明粉', '夏枯草', '菊花', '黄芩', '竹茹', '生地黄', '石膏']	平肝熄风、通腑泻热	['泻下', '清热', '治风']
潜阳通腑方	['大黄', '黄芩', '栀子', '枳实', '莱菔子', '生地黄', '玄参', '白芍', '蔓荆子', '菊花', '钩藤', '牛膝']	通腑泻热、平肝潜阳	['泻下', '清热', '治风']
汤氏经验方	['大黄', '黄连', '生地黄', '天麻', '钩藤', '牛膝', '代赭石', '石决明', '夏枯草', '枳实', '厚朴', '芒硝', '甘草']	平肝潜阳、通腑泻热	['泻下', '清热', '治风']
星蒌承气汤	['栝楼', '大黄', '芒硝', '胆南星']	祛风化痰、通腑泄热	['泻下', '清热', '治风', '祛痰']
加减防风通圣散方	['防风', '荆芥', '麻黄', '薄荷', '大黄', '芒硝', '赤芍', '当归', '川芎', '栀子', '连翘', '黄芩', '滑石', '石膏', '寒水石', '天竺黄', '甘草']	疏风涤痰、泻火通腑	['泻下', '清热', '治风', '祛痰']
羚芍沥黄汤	['羚羊角', '白芍', '竹沥', '大黄', '钩藤', '地龙', '石决明']	平肝清热、化痰通腑	['泻下', '清热', '治风', '祛痰']
龙胆白虎汤	['龙胆草', '石膏', '知母', '竹叶', '瓜蒌', '牡丹皮', '生地黄', '白芍', '大黄', '芒硝']	清肝息风、通腑泻热	['泻下', '清热', '治风', '明目']
白虎承气清营汤	['生地黄', '牡丹皮', '玄参', '赤芍', '金银花', '连翘', '天花粉', '葛根', '石膏', '知母', '薏苡仁', '大黄', '芒硝', '羚羊角']	清营透气、解毒凉肝、通腑泻热	['泻下', '清热', '痈疡', '明目']
泄浊化瘀汤	['大黄', '枳实', '芒硝', '郁金', '菖蒲', '丹参', '川芎']	化痰通腑泄热	['泻下', '清热', '祛痰']
通腑化痰饮	['制马前子', '半夏', '胆南星', '天竺黄', '菖蒲', '郁金', '栝楼', '大黄', '芒硝', '枳实', '川朴']	化痰通腑泻热	['泻下', '清热', '祛痰']
清热通塞汤	['天竺黄', '栝楼', '枳实', '大黄', '葛根', '川芎', '水蛭', '丹参']	清热化痰、祛瘀通腑	['泻下', '清热', '祛痰']
星蒌承气汤	['瓜蒌', '胆南星', '菖蒲', '地龙', '丹参', '郁金', '枳壳', '厚朴', '大黄']	通腑泄热化痰	['泻下', '清热', '祛痰']
星蒌承气汤	['瓜蒌', '胆南星', '大黄', '芒硝']	通腑泄热化痰	['泻下', '清热', '祛痰']
通腑化痰饮	['大黄', '芒硝', '瓜蒌', '胆南星', '丹参']	清热化痰、通腑泻浊	['泻下', '清热', '祛痰']
化痰通腑饮	['栝楼', '胆南星', '大黄', '芒硝']	清热化痰通腑	['泻下', '清热', '祛痰']
蒌星愈延汤	['栝楼', '胆南星', '大黄', '芒硝']	化痰通腑泻热	['泻下', '清热', '祛痰']
巴星散	['巴豆', '胆南星', '黄连']	清热通腑、化痰熄风	['泻下', '清热', '祛痰', '治风']
祛风化痰通络汤	['天竺黄', '僵蚕', '黄芩', '栀子', '瓜蒌皮', '地龙', '全蝎', '大黄', '防风', '甘草']	清热化痰、通腑解毒	['泻下', '清热', '祛痰', '痈疡']
化痰通络汤合星蒌承气汤加味	['茯苓', '半夏', '胆南星', '天竺黄', '天麻', '香附', '芒硝', '大黄', '丹参', '栝楼']	化痰通络、通腑泻热	['泻下', '清热', '祛痰', '理血']
泻下逐瘀汤	['大黄', '甘遂', '猪苓', '茯苓', '泽泻', '枳实', '丹参', '川芎', '赤芍', '桃仁', '泽兰', '牛膝', '水蛭']	通腑泄热、活血祛瘀	['泻下', '清热', '祛痰', '理血']
醒脑清汤	['枳实', '茯苓', '生地黄', '当归', '白术', '黄连', '陈皮', '牛膝', '半夏', '鸡血藤', '水蛭']	化痰逐瘀、通腑泻热	['泻下', '清热', '祛痰', '理血']
星蒌承气汤	['胆南星', '瓜蒌', '大黄', '芒硝']	化痰清热、活血通腑	['泻下', '清热', '祛痰', '理血']
星蒌承气汤	['胆南星', '瓜蒌', '大黄', '芒硝']	化痰清热、活血通腑	['泻下', '清热', '祛痰', '理血']
小承气汤	['大黄', '枳实', '厚朴']	清胃泻火、利水通腑	['泻下', '清热', '祛湿']
丹红通腑汤	['丹参', '红花', '秦艽', '防风', '瓜蒌', '大黄', '枳实', '莱菔子', '厚朴', '芒硝']	化瘀除湿、泻热通腑	['泻下', '清热', '祛湿', '理血']
连朴饮合旋覆代赭汤加减	['黄连', '厚朴', '半夏', '芦根', '菖蒲', '陈皮', '茯苓', '旋覆花', '郁金', '代赭石', '党参', '炙甘草', '檀香', '天花粉']	清热利湿、通腑降气	['泻下', '清热', '祛湿', '理气']
麻子仁丸	['麻仁', '芍药', '枳实', '大黄', '厚朴', '杏仁']	润肠泄热、行气通便	['泻下', '清热', '祛湿', '理气']
麻子仁丸	['火麻仁', '芍药', '枳实', '大黄', '厚朴', '杏仁']	润肠泻热、行气通便	['泻下', '清热', '祛湿', '理气']
麻子仁丸	['麻仁', '芍药', '枳实', '大黄', '厚朴', '杏仁']	润肠泄热、行气通便	['泻下', '清热', '祛湿', '理气']
凉血通瘀汤	['熟大黄', '水牛角', '赤芍', '生地黄', '牡丹皮', '地龙', '三七', '菖蒲']	清热通腑、化瘀通络	['泻下', '清热', '理血']
凉血通瘀汤	['熟大黄', '水牛角', '赤芍', '生地黄', '牡丹皮', '地龙', '三七', '菖蒲']	凉血化瘀、通腑泄热	['泻下', '清热', '理血']
活血化瘀清热通腑汤	['三七', '丹参', '夏枯草', '牛膝', '胆南星', '天竺黄', '大黄', '泽泻']	活血化瘀、清热通腑	['泻下', '清热', '理血']
星蒌承气汤加减	['胆南星', '瓜蒌', '大黄', '芒硝', '青礞石', '丹参', '桃仁', '赤芍', '牛膝']	活血化瘀、清热通腑	['泻下', '清热', '理血']
通腑化瘀汤	['大黄', '芒硝', '枳壳', '天南星', '菖蒲', '瓜蒌', '丹参', '川芎', '桃仁', '赤芍', '当归', '甘草']	通腑泻热、活血化瘀	['泻下', '清热', '理血']
益气通脉汤	['黄芪', '当归', '赤芍', '川芎', '桃仁', '红花', '地龙', '丹参', '牛膝', '水蛭', '大黄']	益气活血、通腑泄热	['泻下', '清热', '理血', '理气']
增液汤	['玄参', '麦冬', '生地黄']	滋阴清热、润肠通便	['泻下', '清热', '补益', '祛湿']
通络祛瘀汤	['水蛭', '丹参', '黄芪', '大黄', '女贞子']	补气活血、通腑泄热	['泻下', '清热', '补益', '理血']
脑梗通方	['天麻', '刺蒺藜', '大黄', '水蛭']	涤邪通腑、活血通经	['泻下', '理血']
芪蛭通脉汤	['黄芪', '水蛭', '丹参', '大黄', '当归', '山楂']	益气活血、通腑	['泻下', '理血', '理气']
小承气汤	['大黄', '枳实', '厚朴']	通腑泻浊、降逆止呃	['泻下', '理气']
木香顺气汤	['木香', '青皮', '陈皮', '大黄', '厚朴', '当归', '草蔻仁', '益智', '苍术', '半夏', '吴茱萸', '干姜', '茯苓', '泽泻', '升麻', '柴胡']	泻下通腑、疏肝醒脾	['泻下', '理气']
黄角汤	['大黄', '水牛角']	通腑开窍	['泻下', '开窍']
灌肠方	['大黄', '牡蛎', '六月雪', '徐长卿', '皂荚']	通腑泄热、开窍启闭	['泻下', '开窍', '清热']
化瘀醒神汤	['大黄', '胆南星', '水蛭', '桃仁', '红花', '茯苓', '白薇', '葛根', '豨莶草']	清热醒神、开窍通腑	['泻下', '开窍', '清热']
通腑醒神汤	['大黄', '牛膝', '丹参', '枳实', '生地黄', '熟地黄', '厚朴', '郁金', '菖蒲', '生石膏', '甘草']	通腑泻热、醒神开窍	['泻下', '开窍', '清热']
通腑解毒汤	['大黄', '金银花', '大青', '连翘', '芦根', '茅根', '元明粉', '黄芩', '菖蒲', '郁金', '莱菔']	通腑泻热、解毒开窍	['泻下', '开窍', '清热', '痈疡']
化痰通腑汤	['大黄', '芒硝', '栝楼', '胆南星']	化痰通腑、清热醒神	['泻下', '开窍', '清热', '祛痰']
醒脑通腑方	['大黄', '枳实', '厚朴', '菖蒲', '郁金', '胆南星', '黄连', '金银花']	化痰醒脑、通腑泄热	['泻下', '开窍', '清热', '祛痰']
醒脑灌肠液	['大黄', '水蛙', '石菖蒲', '冰片']	醒脑开窍、逐癖涤痰、通腑泻热	['泻下', '开窍', '清热', '祛痰']
中风通腑清窍方	['胆南星', '栝楼', '菖蒲', '郁金', '桃仁', '大黄', '枳实', '厚朴', '火麻仁', '钩藤', '麦冬', '丹参', '赤芍', '党参', '炙甘草']	活血通窍、通腑泄热	['泻下', '开窍', '清热', '理血']
通腑化瘀醒脑汤	['大黄', '厚朴', '枳实', '川芎', '山甲', '知母', '桃仁', '菖蒲', '石膏', '西红花', '琥珀粉', '田三七', '麝香', '芒硝']	通腑泻热、活血化瘀、醒脑开窍	['泻下', '开窍', '清热', '理血']
加味星蒌承气汤	['大黄', '芒硝', '栝楼', '胆南星', '菖蒲', '丹参', '天竺黄']	清热通腑、凉血醒脑	['泻下', '开窍', '清热', '理血']
眩晕III号方	['柴胡', '天花粉', '当归', '桃仁', '红花', '炙甘草', '大黄', '代赭石', '郁金', '菖蒲']	活血化瘀、宣窍通腑	['泻下', '开窍', '理血']
通脑灵合剂	['大黄', '大黄酒', '桃仁', '胆南星', '郁金', '水蛭']	活血通络、通腑醒脑	['泻下', '开窍', '理血']
化通合剂	['水蛭', '大黄', '桃仁', '红花', '丹参', '三七', '益母草', '葶苈子']	活血化瘀、通腑开窍	['泻下', '开窍', '理血']
利窍宁血方	['大黄', '竹茹', '菖蒲', '枳实', '天竺黄', '生地黄', '瓜蒌', '胆南星', '牛膝', '三七']	通腑降浊、醒脑开窍	['泻下', '开窍', '理气']
通腑醒脑汤	['大黄', '厚朴', '菖蒲', '木香', '芒硝', '枳实', '冰片']	通腑泻下、理气降逆、开窍醒神	['泻下', '开窍', '理气']
当归润肠汤	['当归', '麦冬', '熟地黄', '黄芪', '何首乌', '肉苁蓉', '火麻仁', '枳壳', '杏仁', '升麻']	补气养血、滋阴润肠	['泻下', '补益']
温脾汤加减	['附子', '干姜', '炙甘草', '人参', '大黄', '猪苓', '茯苓', '白术', '厚朴', '黄连', '吴茱萸']	温补脾肾、通腑导浊	['泻下', '补益', '温里']
芪地通便汤	['黄芪', '生地黄', '山药', '菟丝子', '瓜蒌', '当归', '大黄', '火麻仁', '郁李仁', '槟榔', '枳壳', '肉苁蓉', '山茱萸', '牛膝', '甘草']	滋肾润肠、补气行滞通便	['泻下', '补益', '祛湿']
五苓散	['茯苓', '猪苓', '泽泻', '白术', '桂枝']	健脾渗湿	['消食']
康灵减肥合剂	['黄芪', '泽泻', '荷叶', '山楂', '何首乌', '大黄', '延胡索']	消食健脾	['消食']
健脾瘦身汤	['黄芪', '党参', '白术', '茯苓', '当归', '山药', '白扁豆', '木香', '山楂', '泽泻']	健脾瘦身	['消食']
资寿解语汤	['防风', '附子', '天麻', '肉桂', '羌活', '甘草', '羚羊角', '酸枣仁', '竹叶', '生姜']	平肝祛风、温阳健脾	['消食', '治风', '温里']
双降散	['黄芪', '葛根', '丹参', '山楂', '桑寄生', '豨莶草', '草决明', '钩藤', '鸡血藤', '夏枯草', '益母草']	平肝潜阳、健脾化痰	['消食', '治风', '祛痰']
半夏白术天麻汤	['半夏', '天麻', '茯苓', '陈皮', '白术', '甘草']	化痰熄风、健脾祛湿	['消食', '治风', '祛痰', '祛湿']
半夏白术天麻汤	['天麻', '茯苓', '陈皮']	化痰熄风、健脾祛湿	['消食', '治风', '祛痰', '祛湿']
芎辛导痰汤	['川芎', '细辛', '胆南星', '陈皮', '茯苓', '半夏', '枳壳', '白芷', '蔓荆子', '生姜']	健脾化痰、祛风止痛	['消食', '治风', '祛痰', '理血']
半夏白术天麻汤	['半夏', '天麻', '白术', '茯苓', '陈皮', '甘草', '生姜', '大枣']	健脾燥湿、化痰熄风	['消食', '治风', '祛湿', '祛痰']
防己黄芪汤	['防己', '黄芪', '甘草', '白术']	益气祛风、健脾利水	['消食', '治风', '祛湿', '理气']
还元四号	['人参', '枸杞子', '熟地黄', '楮实子', '茯苓', '白术', '细辛', '川贝母', '牛黄', '杏仁', '红花', '穿山甲']	回元固本、健脾益肾、疏风化痰	['消食', '治风', '补益', '祛痰']
温阳兴奋汤	['巴戟天', '淫羊霍', '仙茅', '附子', '肉桂', '干姜', '党参', '黄芪', '熟地黄', '龟甲', '陈皮', '砂仁', '甘草']	温肾健脾、振奋阳气	['消食', '温里']
真武汤	['茯苓', '芍药', '白术', '生姜', '附子']	温肾健脾	['消食', '温里']
瓜蒌薤白半夏汤	['栝楼实', '薤白', '半夏', '白酒']	行气健脾、温阳化湿	['消食', '温里', '祛湿', '理气']
益温通络汤	['黄芪', '红参', '土鳖虫', '水蛭', '桂枝', '姜黄', '丹参', '制川乌', '赤芍', '白术', '薏苡仁', '甘草']	健脾益气、温阳活血	['消食', '温里', '理血', '理气']
脾肾阳虚证治方	['干姜', '人参', '白术', '炙甘草', '黑附子', '肉桂']	益气健脾、温阳止泻	['消食', '温里', '理气']
化痰利咽汤	['麻黄', '人参', '木蝴蝶', '威灵仙', '益智仁', '白芷', '白术', '茯苓', '僵蚕', '菖蒲', '远志', '甘草']	健脾化痰、利咽开痹	['消食', '祛痰']
六君子汤加减	['党参', '紫苑', '白术', '紫苏子', '杏仁', '陈皮', '胆南星', '前胡', '款冬花', '半夏', '茯苓', '麻黄']	健脾化痰祛瘀	['消食', '祛痰']
二陈汤加味	['党参', '白术', '陈皮', '茯苓', '半夏', '泽泻', '菖蒲', '远志', '鸡血藤', '竹茹', '甘草']	健脾化痰	['消食', '祛痰']
化痰逐瘀降脂汤	['半夏', '陈皮', '丹参', '虎杖', '泽泻', '地龙', '焦山楂', '柴胡', '茯苓', '赤芍', '牛膝', '枳壳', '甘草']	健脾化痰祛瘀	['消食', '祛痰']
十味温胆汤	['半夏', '茯苓', '陈皮', '甘草', '当归', '远志', '菖蒲', '竹茹', '枳实', '党参', '黄芪']	健脾化痰	['消食', '祛痰']
二陈汤	['半夏', '茯苓', '郁金', '陈皮', '白术', '石菖蒲', '枳实', '炙甘草']	健脾通浊化痰	['消食', '祛痰']
健脾除痰降脂汤	['茯苓', '丹参', '白术', '党参', '泽泻', '半夏', '荷叶', '山楂', '陈皮', '甘草']	健脾祛痰化湿、	['消食', '祛痰', '祛湿']
理脾化痰降脂片	['半夏', '白术', '莱菔子', '茯苓', '泽泻', '胆南星', '天麻', '陈皮']	健脾化痰降脂	['消食', '祛痰', '祛湿']
降脂汤	['陈皮', '神曲', '莱菔子', '郁金', '焦山楂']	健脾化痰、降脂排浊	['消食', '祛痰', '祛湿']
健脾化痰方	['陈皮', '半夏', '茯苓', '苍术', '白术', '枳壳', '荷叶', '山楂', '泽泻', '大黄', '薏苡仁', '草决明']	健脾化痰利湿	['消食', '祛痰', '祛湿']
李振华经验方	['白术', '云苓', '泽泻', '玉米须', '桂枝', '半夏', '厚朴', '砂仁', '广木香', '山楂', '鸡内金', '甘草']	温中健脾、祛痰利湿	['消食', '祛痰', '祛湿', '温里']
三仁温胆汤加减	['陈皮', '半夏', '茯苓', '枳实', '竹茹', '杏仁', '薏苡仁', '白蔻仁', '生姜', '大枣']	行气健脾、化痰利湿	['消食', '祛痰', '祛湿', '理气']
通降汤	['黄芪', '茯苓', '泽泻', '山药', '山楂', '丹参', '水蛭', '当归', '半夏']	健脾益气、化痰活血通络	['消食', '祛痰', '理血', '理气']
加味六君子汤	['陈皮', '半夏', '党参', '茯苓', '白术', '炙甘草', '葛根', '山楂', '丹参', '黄精', '何首乌', '荷叶']	益气健脾、祛痰化瘀	['消食', '祛痰', '理血', '理气']
半夏白术天麻汤	['天麻', '茯苓', '陈皮']	健脾化痰、降逆止痛	['消食', '祛痰', '理血', '理气']
旋赭涤痰汤	['旋覆花', '代赭石', '半夏', '陈皮', '枳实', '竹茹', '茯苓', '黄芩', '槟榔', '瓜蒌', '胆南星', '天麻', '钩藤']	化痰降浊、调肝健脾	['消食', '祛痰', '理气']
三子养亲汤	['紫苏子', '白芥子', '莱菔子']	清温肺、化痰、降气消食	['消食', '祛痰', '理气']
三子养亲汤	['紫苏子', '白芥子', '莱菔子']	温肺化痰、降气消食	['消食', '祛痰', '理气']
小半夏加茯苓汤	['茯苓', '半夏', '生姜', '枳壳', '陈皮', '泽泻']	健脾益气化痰	['消食', '祛痰', '理气']
赭决九味汤	['黄芪', '代赭石', '党参', '茯苓', '陈皮', '半夏', '草决明', '白术', '甘草']	健脾益气化痰	['消食', '祛痰', '理气']
分心气饮	['木香', '桑白皮', '丁香', '大腹子', '桔梗', '草果', '大腹皮', '厚朴', '白术', '人参', '香附子', '紫苏', '陈皮', '藿香', '甘草']	行气解郁、健脾化痰	['消食', '祛痰', '理气']
半夏泻心汤	['半夏', '黄连', '黄芩', '干姜', '甘草', '人参', '陈皮', '厚朴', '大枣']	调和肝脾、消食散结	['消食', '祛痰', '理气']
祛痰化瘀降脂方	['苍术', '地龙', '丹参', '制首乌', '陈皮', '半夏', '赤芍', '山楂']	健脾化痰和络、补肝益肾	['消食', '祛痰', '补益']
山楂降脂汤	['山楂', '葛根', '何首乌', '丹参', '川芎', '泽泻', '草决明', '荷叶', '陈皮', '鸡内金']	补肾活血、健脾化痰	['消食', '祛痰', '补益', '理血']
通脉降脂汤	['丹参', '三七', '半夏', '陈皮', '苍术', '泽泻', '制首乌', '枸杞子', '山楂', '茯苓', '荷叶', '甘草']	活血健脾化痰、补肝益肾	['消食', '祛痰', '补益', '理血']
至宝丹	['母猪藤', '郁金', '远志', '天竺黄', '胆南星', '菖蒲', '天麻', '党参', '白术', '山药', '茯苓', '陈皮', '半夏', '丹参', '枸杞子', '麝香', '甘草']	健脾化痰、补益肝肾、养心安神	['消食', '祛痰', '补益', '安神']
茵陈五苓散	['茵陈', '泽泻', '茯苓', '猪苓', '白术', '桂枝']	健脾利水祛湿	['消食', '祛湿']
化浊降脂汤	['制首乌', '苍术', '泽泻', '山楂', '草决明', '女贞子', '红花']	健脾祛湿化浊	['消食', '祛湿']
泽泻汤	['泽泻', '白术']	健脾化湿、燥湿减肥	['消食', '祛湿']
五皮散	['桑白皮', '陈皮', '生姜皮', '大腹皮', '赤茯苓']	健脾利水	['消食', '祛湿']
苓桂术甘草汤	['茯苓', '白术', '桂枝', '甘草']	温化痰饮、健脾利湿	['消食', '祛湿']
健脾汤	['党参', '山药', '莲子', '白扁豆', '茯苓', '白术', '炙甘草', '桂枝', '泽泻', '陈皮', '山楂', '木香', '半夏']	健脾除湿	['消食', '祛湿']
牵牛子散	['白牵牛子', '草决明', '泽泻', '荷叶', '山楂', '白术', '丹参', '大腹皮']	利水消食	['消食', '祛湿']
消脂方	['黄芪', '党参', '防己', '白术', '何首乌', '泽泻', '山楂', '茵陈', '茯苓', '淫羊藿', '大黄']	健脾化湿除痰	['消食', '祛湿']
祛痰消脂方	['陈皮', '苍术', '半夏', '丹参', '赤芍', '决明子', '制首乌', '黄芪', '地龙', '山楂', '大黄', '泽泻', '茯苓', '天麻', '太子参']	健脾化湿除痰	['消食', '祛湿']
健脾瘦身汤	['黄芪', '党参', '白术', '茯苓', '当归', '山药', '白扁豆', '木香', '山楂', '泽泻']	健脾化湿	['消食', '祛湿']
苓桂术甘汤	['茯苓', '桂枝', '白术', '甘草']	温阳化饮、健脾利湿	['消食', '祛湿', '温里']
实脾饮加减	['干姜', '附子', '草果', '桂枝', '白术', '茯苓', '炙甘草', '生姜', '大枣', '泽泻', '车前子', '木瓜', '木香', '厚朴', '大腹皮']	健脾温阳利水	['消食', '祛湿', '温里']
苓桂术甘汤	['茯苓', '桂枝', '白术', '甘草']	温阳化饮、健脾利湿	['消食', '祛湿', '温里']
泽泻汤	['泽泻', '白术']	健脾利湿、化痰止眩	['消食', '祛湿', '祛痰']
化痰通脑饮	['半夏', '泽泻', '天竺黄', '僵蚕', '菖蒲', '茯苓', '藿香', '赤芍', '水蛭', '蒲黄', '薏苡仁', '陈皮']	健脾祛湿、化痰通脑	['消食', '祛湿', '祛痰']
参苓白术散加减	['人参', '白术', '茯苓', '陈皮', '泽泻', '山楂', '桔梗', '炙甘草']	健脾祛湿降脂	['消食', '祛湿', '祛痰']
化痰降脂饮	['泽泻', '白术', '半夏', '猪苓', '陈皮', '山药', '何首乌', '山楂', '薏苡仁', '车前草']	健脾利湿、化痰降脂	['消食', '祛湿', '祛痰']
保守魁经验方	['茯苓', '泽泻', '白术', '瓜蒌', '海藻', '丹参', '川芎', '大黄', '山楂', '姜黄', '陈皮']	健脾利湿、化痰消瘀	['消食', '祛湿', '祛痰']
六君子汤	['人参', '白术', '茯苓', '甘草']	益气健脾、燥湿化痰	['消食', '祛湿', '祛痰', '理气']
导痰汤	['半夏', '陈皮', '茯苓', '枳实', '南星', '甘草']	益气健脾、燥湿化痰	['消食', '祛湿', '祛痰', '理气']
香砂六君子汤	['人参', '白术', '甘草', '陈皮', '半夏', '砂仁', '木香']	益气健脾、燥湿化痰	['消食', '祛湿', '祛痰', '理气']
六君子汤	['人参', '白术', '茯苓', '炙甘草', '陈皮', '半夏']	益气健脾、燥湿化痰	['消食', '祛湿', '祛痰', '理气']
六君子汤加味	['人参', '白术', '茯苓', '炙甘草', '陈皮', '半夏']	健脾益气、燥湿化痰	['消食', '祛湿', '祛痰', '理气']
柴胡桂枝干姜汤合当归芍药散加减	['柴胡', '干姜', '黄芪', '甘草', '桂枝', '生牡蛎', '当归', '川芎', '赤芍', '茯苓', '白术', '泽泻', '黄芩']	疏肝健脾、化湿祛瘀	['消食', '祛湿', '祛痰', '理气']
活血化瘀汤	['白术', '陈皮', '桃仁', '半夏', '土鳖虫', '甘草']	活血化瘀、健脾燥湿	['消食', '祛湿', '理血']
山楂祛脂汤	['山楂', '鸡血藤', '地龙', '丹参', '当归', '茯苓', '白术', '熟地黄', '何首乌', '桑寄生', '泽泻', '甘草']	健脾化浊、降血脂、活血化瘀、扩冠脉	['消食', '祛湿', '理血']
林柏经验方加味二陈汤	['半夏', '陈皮', '泽泻', '茯苓', '川芎', '水蛭', '大黄', '甘草']	健脾祛湿、活血化瘀	['消食', '祛湿', '理血']
温肾阳健脾汤	['黄芪', '党参', '白术', '丹参', '牛膝', '鸡血藤', '薏苡仁', '茯苓']	温肾健脾、活血利湿	['消食', '祛湿', '理血', '温里']
五皮饮	['生姜', '桑白皮', '陈皮', '大腹皮', '茯苓']	利水消肿、理气健脾	['消食', '祛湿', '理血', '理气']
参苓白术散	['莲子', '砂仁', '白扁豆', '桔梗', '人参', '茯苓', '薏苡仁', '白术', '山药', '甘草']	益气健脾、利水消肿	['消食', '祛湿', '理血', '理气']
健脾通络汤加味	['黄芪', '丹参', '鸡血藤', '党参', '牛膝', '茯苓', '车前子', '生姜皮', '薏苡仁', '白术']	益气健脾、祛湿通络	['消食', '祛湿', '理血', '理气']
涤痰汤合复元活血汤加减	['人参', '茯苓', '半夏', '陈皮', '枳实', '竹茹', '柴胡', '大黄', '桃仁', '红花', '穿山甲', '海藻', '昆布', '山楂', '甘草']	健脾祛湿、疏肝活血	['消食', '祛湿', '理血', '理气']
升阳益胃汤	['黄芪', '半夏', '人参', '炙甘草', '独活', '防风', '白芍', '羌活', '陈皮', '茯苓', '柴胡', '泽泻', '白术', '黄连']	健脾、益气、利湿	['消食', '祛湿', '理气']
五皮饮合胃苓汤	['桑白皮', '陈皮', '大腹皮', '茯苓皮', '生姜皮', '白术', '苍术', '厚朴', '猪苓', '泽泻']	健脾化湿、通阳利水	['消食', '祛湿', '理气']
益气健脾通便汤加味	['黄芪', '党参', '白术', '当归', '升麻', '柴胡']	益气健脾通便	['消食', '祛湿', '理气']
越鞠保和丸合参苓白术散加减	['苍术', '神曲', '茯苓', '白术', '香附', '川芎', '栀子', '陈皮', '山药', '薏苡仁', '砂仁']	行气解郁、健脾除湿	['消食', '祛湿', '理气']
健脾消脂汤	['白术', '苍术', '茯苓', '泽泻', '桂枝', '陈皮', '半夏', '厚朴', '枳壳', '香附', '荷叶', '玉米须', '甘草']	健脾祛湿、通阳利水	['消食', '祛湿', '理气']
舒肝健脾汤	['香附', '木香', '佛手', '党参', '茯苓', '苍术', '白术', '厚朴', '陈皮', '柴胡', '郁金', '白芍', '枳壳', '山楂', '泽泻', '炙甘草']	健脾化湿、疏肝理气	['消食', '祛湿', '理气']
清热利湿汤	['柴胡', '栀子', '龙胆草', '茅根', '薏苡仁', '牛膝', '苍术', '黄柏', '茵陈', '虎杖', '泽泻', '茯苓', '草决明', '甘草']	健脾化湿、疏肝理气	['消食', '祛湿', '理气']
降脂减肥健美饮	['党参', '黄芪', '茯苓', '丹参', '熟地黄', '白术', '车前子']	益气健脾、化湿除痰	['消食', '祛湿', '理气']
利湿减肥方	['党参', '茯苓', '白术', '车前子', '熟地黄', '泽泻', '丹参', '山药', '何首乌', '山楂', '猪苓', '大黄', '枳壳']	益气健脾、渗水利湿	['消食', '祛湿', '理气']
实脾饮	['厚朴', '白术', '木瓜', '木香', '草果', '大腹子', '附子', '茯苓', '干姜', '甘草']	温阳健脾、行气利水	['消食', '祛湿', '理气', '温里']
实脾饮	['厚朴', '白术', '木瓜', '木香', '草果', '大腹皮', '附子', '茯苓', '干姜', '炙甘草', '生姜', '大枣']	温阳健脾、行气利水	['消食', '祛湿', '理气', '温里']
实脾饮	['白术', '厚朴', '木瓜', '木香', '草果', '大腹子', '茯苓', '干姜', '制附', '炙甘草', '生姜', '大枣']	温阳健脾、行气利水、	['消食', '祛湿', '理气', '温里']
胃苓汤	['苍术', '陈皮', '厚朴', '甘草', '泽泻', '猪苓', '赤茯苓', '白术', '肉桂']	健脾燥湿、和中利水	['消食', '祛湿', '和解']
芙蓉降脂减肥灵	['山楂', '神曲', '半夏', '茯苓', '莱菔子', '荷叶', '陈皮', '白术', '人参']	消食和胃、健脾化湿	['消食', '祛湿', '和解']
眩晕宁片	['泽泻', '白术', '茯苓', '陈皮', '半夏', '女贞子', '墨旱莲', '菊花', '牛膝', '甘草']	健脾利湿、补益肝肾	['消食', '祛湿', '补益']
降脂黏汤三号	['党参', '黄芪', '菟丝子', '何首乌', '茯苓', '杜仲', '吴茱萸', '当归', '丹参', '白豆蔻', '薏苡仁', '泽泻']	健脾祛湿、温补肾阳	['消食', '祛湿', '补益', '温里']
宁晕汤	['半夏', '白术', '天麻', '陈皮', '茯苓', '泽泻', '牛膝', '女贞子', '墨旱莲', '甘草', '生姜']	健脾利湿祛痰、益肝补肾	['消食', '祛湿', '补益', '祛痰']
活血补气益肾汤	['桃仁', '红花', '川芎', '丹参', '水蛭', '当归', '黄芪', '白术', '党参', '茯苓', '泽泻', '枸杞子', '益母草', '山药', '山茱萸', '菟丝子']	活血化瘀、补气益肾、健脾化湿	['消食', '祛湿', '补益', '理血']
法半夏天麻白术汤	['半夏', '麦芽', '陈皮', '白术', '神曲', '干姜', '苍术', '黄柏', '人参', '茯苓', '泽泻', '黄芪', '天麻']	健脾燥湿、去痰利水、补中益气	['消食', '祛湿', '补益', '理气']
荷术汤	['荷叶', '苍术', '白术', '黄柏', '牛膝', '薏苡仁', '黄芪', '桂枝', '木瓜', '茯苓', '泽泻', '山楂', '车前子', '虎杖', '夏枯草', '甘草']	健脾利湿、补气通阳	['消食', '祛湿', '补益', '理气']
四君子汤合二陈汤加减	['人参', '白术', '茯苓', '半夏', '陈皮', '木香', '砂仁', '紫苏子', '白芥子', '莱菔子', '菖蒲', '天麻', '炙甘草', '生姜', '大枣', '朱砂']	健脾祛痰、清心利窍	['消食', '清热', '祛痰']
清热化痰汤	['人参', '白术', '茯苓', '炙甘草', '陈皮', '半夏', '麦冬', '菖蒲', '枳实', '木香', '竹茹', '黄芩', '黄连', '天南星']	清热化痰、健脾益气	['消食', '清热', '祛痰', '理气']
降脂散	['防风', '荆芥', '连翘', '麻黄', '川芎', '当归', '白芍', '白术', '栀子', '大黄', '芒硝', '石膏', '黄芩', '桔梗', '甘草', '滑石']	清热解表、健脾祛湿	['消食', '清热', '祛湿']
葛根芩连汤合五苓散加减	['葛根', '黄连', '黄芩', '炙甘草', '猪苓', '茯苓', '泽泻', '白术', '桂枝']	健脾助运、清热利湿、活血化瘀	['消食', '清热', '祛湿', '理血']
保和丸	['山楂', '神曲', '半夏', '茯苓', '陈皮', '连翘', '莱菔子']	消食和胃泄热	['消食', '清热', '和解']
干姜黄芩黄连人参汤	['干姜', '黄芩', '黄连', '人参']	清热和胃、健脾助运	['消食', '清热', '和解']
无比山药丸	['山药', '泽泻', '茯苓', '生地黄', '巴戟天', '菟丝子', '杜仲', '肉苁蓉']	益肾健脾、清利湿浊	['消食', '清热', '补益']
参苓白术散合二仙汤	['党参', '白术', '茯苓', '山药', '仙茅', '仙灵脾', '白扁豆', '薏苡仁', '砂仁', '陈皮']	益肾健脾、清利湿浊	['消食', '清热', '补益']
滋阴益肾汤	['生地黄', '山茱萸', '墨旱莲', '牡丹皮', '泽泻', '茯苓', '猪苓', '牛膝', '桑寄生', '白茅根', '益母草', '黄芪', '石苇']	滋肾健脾、清热利湿	['消食', '清热', '补益', '祛湿']
防己黄芪汤合葵子茯苓散加减	['汉防己', '黄芪', '白术', '茯苓', '冬葵子', '熟地黄', '连翘', '败酱草', '甘草']	健脾补肾、利湿清热通淋	['消食', '清热', '补益', '祛湿']
丹栀逍遥散	['当归', '芍药', '茯苓', '白术', '柴胡', '炙甘草']	养血健脾、疏肝清热	['消食', '清热', '补益', '理气']
逍遥散	['当归', '芍药', '茯苓', '白术', '柴胡', '牡丹皮', '栀子', '炙甘草']	养血健脾、疏肝清热	['消食', '清热', '补益', '理气']
丹栀逍遥散	['柴胡', '当归', '白芍', '白术', '茯苓', '甘草', '牡丹皮', '栀子']	疏肝健脾、养血清热	['消食', '清热', '补益', '理气']
玉液汤	['山药', '黄芪', '知母', '鸡内金', '葛根', '五味子', '天花粉']	健脾益气、清热生津、	['消食', '清热', '补益', '理气']
升麻丸	['升麻', '黄芩', '麦门冬', '生地黄', '苦蒌根', '苦参', '人参', '黄连', '黄柏']	健脾升阳、益气生津、清热降火	['消食', '清热', '补益', '理气']
施今墨经验方	['苍术', '玄参', '黄芪', '山药', '葛根', '丹参', '知母', '黄柏', '肉桂', '天冬', '麦冬']	益气健脾、养阴清热、补肾固遗	['消食', '清热', '补益', '理气']
减肥轻身方	['黑牵牛子', '白牵牛子', '草决明', '泽泻', '白术', '山楂', '制首乌']	消食化瘀、减肥去脂	['消食', '理血']
温肾健脾汤	['附子', '肉桂', '干姜', '黄芪', '党参', '当归', '赤芍', '红花', '桃仁', '玄参', '苏木', '牛膝', '陈皮', '山药', '甘草']	温肾健脾、活血化瘀	['消食', '理血', '温里']
化痰逐瘀方	['陈皮', '胆南星', '丹参', '茯苓', '白术', '天麻', '枳实', '半夏', '水蛭']	健脾化痰、除湿、活血逐瘀	['消食', '理血', '祛痰', '祛湿']
补阳还五汤	['地龙', '川芎', '红花', '桃仁']	健脾益气、活血通络	['消食', '理血', '理气']
补阳还五汤合六君子汤	['黄芪', '党参', '白术', '桃仁', '当归', '红花', '川芎', '赤芍', '陈皮', '茯苓', '半夏', '炙甘草']	健脾益气、活血通络	['消食', '理血', '理气']
健脾益气方	['炙黄芪', '党参', '白术', '升麻', '柴胡', '当归', '炙甘草', '黄精']	健脾益气、活血升阳	['消食', '理血', '理气']
益气化瘀方	['黄芪', '玄参', '当归', '苍术', '山药', '葛根', '丹参', '地龙', '红花', '生地黄']	益气健脾、活血化瘀	['消食', '理血', '理气']
益气活血汤	['党参', '黄芪', '牡丹皮', '当归', '仙鹤草', '土大黄', '茜草']	益气健脾、凉血活血	['消食', '理血', '理气']
明楂首乌降脂汤	['草决明', '山楂', '何首乌', '益母草', '白术', '莱菔子', '陈皮', '白芍', '黄精', '泽泻', '川芎', '甘草']	滋补肝肾健脾祛痰化瘀	['消食', '理血', '补益', '祛痰']
四君子汤	['人参', '白术', '茯苓', '炙甘草']	益气健脾	['消食', '理气']
参苓白术散	['莲子', '薏苡仁', '砂仁', '桔梗', '白扁豆', '茯苓', '人参', '炙甘草', '白术', '山药']	益气健脾	['消食', '理气']
香砂六君汤	['人参', '茯苓', '白术', '茯苓', '甘草', '陈皮', '半夏', '砂仁', '木香', '生姜']	益气健脾行气	['消食', '理气']
补中益气汤加味	['党参', '黄芪', '白术', '茯苓', '当归', '陈皮', '砂仁', '升麻', '柴胡', '石韦', '车前子', '薏苡仁', '炙甘草']	健脾益气、升清降浊	['消食', '理气']
参苓白术散合补中益气汤加减	['党参', '白术', '山药', '白扁豆', '莲子', '甘草', '大枣', '黄芪', '当归', '薏苡仁', '茯苓', '砂仁', '陈皮', '升麻', '柴胡', '神曲']	益气健脾	['消食', '理气']
补中益气汤	['黄芪', '炙甘草', '人参', '当归', '陈皮', '升麻', '柴胡', '白术']	健脾益气、升清固摄	['消食', '理气']
杨毅经验方	['黄芪', '苍术', '茯苓', '黄精', '枸杞子', '陈皮', '车前子', '菟丝子']	健脾益气、清湿热	['消食', '理气']
补中益气汤加减	['黄芪', '白术', '党参', '当归', '升麻', '柴胡', '龙骨', '牡蛎', '五味子', '陈皮', '炙甘草']	健脾补肺、益气固脬	['消食', '理气']
参苓白术散	['莲子', '薏苡仁', '砂仁', '桔梗', '白扁豆', '茯苓', '人参', '甘草', '白术', '山药']	益气健脾、渗湿固涩	['消食', '理气']
补中益气汤	['党参', '黄芪', '白术', '山药', '益智仁', '金樱子', '莲子', '芡实', '升麻', '柴胡', '乌药', '青皮', '郁金']	健脾益气、升清固摄	['消食', '理气']
补中益气汤	['人参', '当归', '柴胡', '陈皮', '升麻', '炙甘草']	健脾益气、甘温除热	['消食', '理气']
补中益气汤加减	['太子参', '茯苓', '陈皮', '升麻', '半夏', '川贝母', '蛤蚧', '黄芪', '白术', '柴胡', '五味子']	补肺健脾、益气定喘	['消食', '理气']
四君子汤	['人参', '白术', '茯苓', '甘草']	健脾益气、祛除病邪	['消食', '理气']
补中益气汤加减	['人参', '陈皮', '白术', '黄芪', '柴胡', '白芥子', '莱菔子', '鸡血藤', '云苓', '怀山药', '苍术', '厚朴', '甘草']	健脾益气	['消食', '理气']
脾胃气虚证治方	['黄芪', '党参', '当归', '陈皮', '升麻', '白术', '柴胡', '炙甘草']	益气健脾、胜湿止泻	['消食', '理气']
参苓白术散	['白扁豆', '白术', '茯苓', '甘草', '桔梗', '莲子', '人参', '砂仁', '山药', '薏苡仁']	益气健脾、渗湿止泻	['消食', '理气']
异功散	['人参', '白术', '茯苓', '甘草', '陈皮']	益气健脾、行气化滞	['消食', '理气']
小儿减肥散	['木香', '砂仁', '枳壳', '白术', '皂荚', '荔枝核', '莪术']	理气健脾	['消食', '理气']
补中益气汤	['党参', '黄芪', '白术', '甘草', '陈皮', '当归', '升麻', '柴胡']	健脾益气	['消食', '理气']
调胃续命汤合熊胆散	['薏苡仁', '莱菔子', '藁本', '菖蒲', '麦冬', '桔梗', '麻黄', '熊胆']	补肺祛风、健脾化痰开窍	['消食', '开窍', '治风', '祛痰']
法夏白术天麻汤	['半夏', '白术', '陈皮', '茯苓', '菖蒲', '天麻', '白蔻仁', '葛根', '丹参', '牛膝', '钩藤', '丝瓜络']	健脾化痰、开窍醒神	['消食', '开窍', '祛痰']
柴桂温胆定志汤	['柴胡', '黄芩', '半夏', '人参', '生姜', '大枣', '甘草', '桂枝', '芍药', '陈皮', '竹茹', '茯苓', '菖蒲', '远志', '枳实']	扶阳、健脾祛痰、宁神开窍	['消食', '开窍', '祛痰']
洗心汤	['党参', '茯苓', '半夏', '菖蒲', '陈皮', '附子', '神曲', '肉桂', '酸枣仁']	化痰宣窍、健脾温肾	['消食', '开窍', '祛痰', '温里']
指迷汤加减	['人参', '白术', '半夏', '陈皮', '菖蒲', '肉豆蔻', '天南星', '附子', '茯神', '枣仁', '神曲', '甘草']	温肾健脾、化痰开窍	['消食', '开窍', '祛痰', '温里']
涤痰汤加味	['竹茹', '天南星', '半夏', '陈皮', '枳实', '僵蚕', '甘草', '菖蒲', '远志', '茯苓', '党参']	开窍化痰、健脾益气	['消食', '开窍', '祛痰', '理气']
涤痰汤	['南星', '半夏', '枳实', '茯苓', '陈皮', '菖蒲', '人参', '竹茹', '甘草']	豁痰开窍、行气健脾	['消食', '开窍', '祛痰', '理气']
洗心汤	['人参', '甘草', '半夏', '陈皮', '附子', '茯神', '酸枣仁', '神曲', '菖蒲']	健脾益气、豁痰开窍	['消食', '开窍', '祛痰', '理气']
涤痰汤加味	['竹茹', '胆南星', '半夏', '陈皮', '枳实', '僵蚕', '甘草', '菖蒲', '远志', '茯苓', '党参']	开窍化痰、健脾益气	['消食', '开窍', '祛痰', '理气']
涤痰汤	['南星', '半夏', '枳实', '茯苓', '菖蒲', '人参']	豁痰开窍、行气健脾	['消食', '开窍', '祛痰', '理气']
洗心汤	['人参', '茯神', '半夏', '陈皮', '神曲', '甘草', '附子', '菖蒲', '枣仁']	健脾化浊、豁痰开窍	['消食', '开窍', '祛湿', '祛痰']
六君子汤加减	['人参', '苍术', '白术', '茯苓', '半夏', '菖蒲', '陈皮', '薏苡仁', '甘草']	功能健脾燥湿、化痰开窍	['消食', '开窍', '祛湿', '祛痰']
藿菖平胆汤	['藿香', '白芷', '菖蒲', '竹茹', '半夏', '枳壳', '厚朴', '茯苓', '苍术', '杏仁', '白蔻仁', '通草', '薏苡仁', '丹参']	健脾燥湿化痰、醒神开窍	['消食', '开窍', '祛湿', '祛痰']
自拟活血健脾利水方	['当归', '川芎', '赤芍', '猪苓', '茯苓', '白术', '泽泻', '路路通', '穿山甲', '桂枝', '泽兰', '车前子', '藁本']	健脾活血、利水通窍	['消食', '开窍', '祛湿', '理血']
指迷汤加减	['半夏', '天南星', '白术', '陈皮', '菖蒲', '附子', '人参', '甘草', '神曲', '肉豆蔻']	健脾益气、除痰开窍	['消食', '开窍', '理气']
陶氏经验二方	['陈皮', '半夏', '茯苓', '竹茹', '枳实', '党参', '白术', '甘草', '熟地黄', '山茱萸', '菖蒲', '丹参']	健脾补肾、化痰开窍	['消食', '开窍', '补益', '祛痰']
醒脑汤	['磁石', '土鳖虫', '葛根', '羌活', '藁本', '菖蒲', '党参', '黄芪', '鹿角胶', '熟地黄', '肉苁蓉', '桃仁', '红花']	健脾、活血、开窍、益智	['消食', '开窍', '补益', '理血']
枳实消痞丸	['枳壳', '白术', '党参', '茯苓', '麦芽', '神曲', '半夏', '黄连', '厚朴', '干姜', '炙甘草']	消痞除满、健脾和胃	['消食', '和解']
七味白术散	['人参', '白术', '茯苓', '藿香', '木香', '甘草', '葛根']	健脾和胃	['消食', '和解']
保和丸	['山楂', '神曲', '半夏', '茯苓', '陈皮', '连翘', '莱菔子']	消食和胃	['消食', '和解']
十味温胆汤加减	['半夏', '陈皮', '茯苓', '甘草', '竹茹', '枳实', '党参', '黄芪', '菖蒲', '远志']	益气化痰、健脾和胃	['消食', '和解', '祛痰', '理气']
逍遥散加减	['柴胡', '当归', '茯苓', '芍药', '白术', '甘草', '半夏', '生姜']	疏肝解郁、健脾和营	['消食', '和解', '理气']
逍遥散	['柴胡', '芍药', '当归', '白术', '茯苓', '薄荷', '生姜', '甘草']	疏肝解郁、健脾和营	['消食', '和解', '理气']
逍遥散	['柴胡', '当归', '白芍', '白术', '茯苓', '生姜', '薄荷', '炙甘草']	疏肝解郁、健脾和营	['消食', '和解', '理气']
参苓白术散	['莲子', '薏苡仁', '砂仁', '桔梗', '白扁豆', '茯苓', '人参', '甘草', '白术', '山药']	健脾益气、和胃渗湿	['消食', '和解', '理气']
健胃汤	['人参', '白术', '茯苓', '半夏', '陈皮', '厚朴', '苍术', '砂仁', '白豆蔻', '甘草', '枳壳', '鸡内金']	健脾益气、消积和胃	['消食', '和解', '理气']
逍遥散	['甘草', '当归', '茯苓', '芍药', '白术', '柴胡']	疏肝养血、健脾和中	['消食', '和解', '补益', '理气']
甘草人参汤	['甘草', '红参']	益气健脾、摄血固脱	['消食', '固涩', '理气']
双补稳步汤	['黄芪', '党参', '白术', '当归', '丹参', '熟地黄', '山药', '牛膝', '杜仲', '威灵仙', '鹿角胶', '炙甘草']	补肾健脾、填精益脑	['消食', '补益']
四君子汤合济生肾气丸加减	['党参', '黄芪', '白术', '茯苓', '山药', '山茱萸', '牛膝', '车前子', '仙灵脾']	补气健脾益肾	['消食', '补益']
健脾补肾汤	['党参', '黄芪', '黄精', '山药', '山茱萸', '泽泻', '莲子', '薏苡仁', '芡实', '茯苓', '白术', '制附', '生姜', '白芍', '山楂', '补骨脂', '沙苑子', '甘草']	健脾补肾	['消食', '补益']
减肥降脂茶	['枸杞子', '何首乌', '草决明', '山楂', '丹参']	滋阴健脾	['消食', '补益']
理中汤	['人参', '干姜', '炙甘草', '白术']	温中祛寒、补气健脾	['消食', '补益', '温里']
桂附理中丸	['肉桂', '附子', '党参', '白术', '炮姜', '甘草']	补肾助阳、温中健脾	['消食', '补益', '温里']
健脾益肾散	['山药', '茯苓', '大豆', '黑米', '金荞麦', '山楂', '黑芝麻']	健脾补肾、化痰祛瘀	['消食', '补益', '祛痰']
温阳益肾健脑方	['附子', '熟地黄', '山茱萸', '补骨脂', '淫羊藿', '菟丝子', '丹参', '川芎', '地龙', '蜈蚣', '红参', '白术', '磁石', '炙甘草', '茯苓', '菖蒲', '远志']	补肾填精、健脾益气、化痰祛瘀、健脑益智	['消食', '补益', '祛痰', '理气']
大补元煎加减	['人参', '山药', '黄芪', '熟地黄', '杜仲', '枸杞子', '山茱萸', '海藻', '昆布']	健脾益肾、软坚散结	['消食', '补益', '祛痰', '理气']
参苓白术散	['人参', '白术', '茯苓', '甘草', '山药', '白扁豆', '莲子', '薏苡仁', '砂仁', '陈皮']	健脾补气、化湿利水	['消食', '补益', '祛湿']
防麻参散	['防风', '茯苓', '怀山药', '山楂', '麻黄', '苍术', '川芎', '黄芪', '白术', '泽泻', '车前子', '丹参']	健脾益肾、消痰利水	['消食', '补益', '祛湿']
益气降糖方	['黄芪', '山药', '苍术', '玄参', '西洋参', '丹参', '生地黄', '麦冬', '茯苓', '栝楼', '石斛', '砂仁', '五味子']	益气养阴、燥湿健脾	['消食', '补益', '祛湿', '理气']
逐瘀补气汤	['半枝莲', '水蛭', '僵蚕', '菖蒲', '黄芪', '白术', '肉苁蓉', '当归']	逐瘀泄毒、补气健脾	['消食', '补益', '理血']
补肾健脾养血活血方	['淫羊藿', '女贞子', '枸杞子', '何首乌', '菟丝子', '黄精', '黄芪', '当归', '丹参', '山楂']	补肾健脾、养血活血	['消食', '补益', '理血']
三黑荣脑汤	['桑葚子', '黑豆', '黑芝麻', '黄芪', '党参', '熟地黄', '菟丝子', '枸杞子', '全蝎', '地龙', '水蛭', '土鳖虫', '柴胡', '羌活', '陈皮', '谷芽', '麦芽']	补肾健脾、益精荣脑、化瘀通络	['消食', '补益', '理血']
补肾健脾活血方	['补骨脂', '淫羊藿', '肉苁蓉', '熟地黄', '白芍', '黄芪', '菟丝子', '丹参', '当归', '大枣']	补肾健脾活血	['消食', '补益', '理血']
劲骨坚颗粒	['杜仲', '骨碎补', '川牛膝', '牛膝', '细辛', '白术', '川芎']	补肾壮骨、健脾活血化瘀	['消食', '补益', '理血']
黄土汤	['甘草', '生地黄', '白术', '附子', '阿胶', '黄芩', '灶心土']	温阳健脾、养血止血	['消食', '补益', '理血', '温里']
养心归脾汤	['党参', '黄芪', '茯苓', '赤芍', '枣仁', '当归', '龙眼肉', '白术', '远志', '木香', '炙甘草']	健脾益气、养血活血	['消食', '补益', '理血', '理气']
稳心颗粒	['党参', '黄精', '三七', '琥珀', '甘松']	益气养血、健脾理气、活血化瘀	['消食', '补益', '理血', '理气']
归芍六君子汤	['当归', '白芍', '人参', '白术', '茯苓', '陈皮', '半夏', '炙甘草']	益气健脾、补血止血	['消食', '补益', '理血', '理气']
刘保胜经验方	['川芎', '当归', '生地黄', '白术', '茯苓', '黄芩', '丹参']	活血化瘀、健脾益气、滋肾养阴	['消食', '补益', '理血', '理气']
阿芪景天汤	['阿胶', '党参', '当归', '熟地黄', '制首乌', '黄芪', '黄精', '红景天', '三七', '槐花', '白术', '莲子', '山药']	健脾益气、滋阴养血、活血止血	['消食', '补益', '理血', '理气']
金匮肾气汤加减	['党参', '黄芪', '熟地黄', '当归', '山茱萸', '白术', '白芍', '茯苓', '枸杞子', '龟甲', '女贞子', '仙灵脾', '山药', '青皮', '陈皮', '菟丝子', '五味子', '补骨脂', '鸡内金', '麦芽', '山楂', '神曲', '菖蒲', '郁金']	补肾健脾、益气生精	['消食', '补益', '理气']
逍遥散	['甘草', '当归', '茯苓', '白芍', '白术', '柴胡']	疏肝解郁、养血健脾	['消食', '补益', '理气']
肾衰一号汤加减	['党参', '黄芪', '生地黄', '泽泻', '茯苓', '山药', '山茱萸', '牛膝', '车前子', '益母草']	健脾补肾、益气养阴	['消食', '补益', '理气']
固本止遗汤	['黄芪', '肉桂', '益智仁', '桑螵蛸', '五味子', '菖蒲', '乌药', '党参', '白术', '山药', '芡实', '鸡内金', '甘草']	健脾益气、补肾固脬	['消食', '补益', '理气']
逍遥散	['柴胡', '当归', '白芍', '白术', '茯苓']	疏肝解郁、养血健脾	['消食', '补益', '理气']
还少丹	['山药', '牛膝', '山茱萸', '茯苓', '五味子', '肉苁蓉', '菖蒲', '巴戟天', '远志', '杜仲', '楮实', '小茴香', '枸杞子', '熟地黄']	补肾健脾、益气生精	['消食', '补益', '理气']
通络益肾胶囊	['黄芪', '生地黄', '山药', '山茱萸', '茯苓', '泽泻', '川芎', '丹参', '地龙', '全蝎', '水蛭', '蜈蚣', '半夏', '大黄']	健脾补肾、益气养阴	['消食', '补益', '理气']
乌芪柴明汤	['何首乌', '黄芪', '薏苡仁', '柴胡', '草决明', '虎杖', '山楂', '瓜蒌', '泽泻', '川芎', '白术', '陈皮', '土鳖虫']	健脾益气补肾、疏肝解郁降浊	['消食', '补益', '理气']
逍遥散	['甘草', '当归', '茯苓', '白芍', '白术', '柴胡']	疏肝解郁、养血健脾	['消食', '补益', '理气']
还少丹	['山药', '牛膝', '山茱萸', '茯苓', '五味子', '肉苁蓉', '菖蒲', '巴戟天', '远志', '杜仲', '楮实', '八角茴香', '小茴香', '枸杞子', '熟地黄']	补肾健脾、益气生精	['消食', '补益', '理气']
逍遥散	['柴胡', '当归', '白芍', '白术', '茯苓', '生姜', '薄荷', '炙甘草']	疏肝解郁、养血健脾	['消食', '补益', '理气']
还少丹	['山药', '牛膝', '山茱萸', '茯苓', '五味子', '肉苁蓉', '菖蒲', '巴戟天', '远志', '楮实', '小茴香', '枸杞子', '熟地黄']	补肾健脾、益气生精	['消食', '补益', '理气']
理血养肝健脾汤	['墨旱莲', '白术', '茯苓']	补血滋肾、养肝健脾、益气补中	['消食', '补益', '理气']
归脾汤加减	['党参', '黄芪', '白术', '当归', '茯苓', '远志', '酸枣仁', '龙眼肉']	健脾养心、益气生血	['消食', '补益', '理气', '安神']
归脾汤	['白术', '当归', '茯苓', '黄芪', '龙眼肉', '远志', '酸枣仁']	健脾养心、益气补血	['消食', '补益', '理气', '安神']
归脾汤	['白术', '当归', '茯苓', '黄芪', '龙眼肉', '远志', '酸枣仁', '木香', '甘草', '人参']	健脾养心、益气补血	['消食', '补益', '理气', '安神']
归脾汤	['白术', '当归', '茯苓', '黄芪', '龙眼肉', '远志', '酸枣仁', '木香', '甘草', '人参']	健脾养心、益气补血	['消食', '补益', '理气', '安神']
归脾汤加减	['黄芪', '人参', '白术', '炙甘草', '当归', '白芍', '龙眼肉', '远志', '营蒲', '茯苓', '木香']	健脾养心、补气养血	['消食', '补益', '安神']
归脾汤	['人参', '麦冬', '五味子', '白术', '黄芪', '云苓', '当归', '枣仁', '山茱萸', '远志', '生龙骨', '生牡蛎', '神曲', '木香', '炙甘草']	益气补血、健脾养心	['消食', '安神', '补益', '理气']
八珍汤加减	['当归', '白芍', '党参', '熟地黄', '川芎', '白术', '茯苓', '甘草']	健脾益气、养血安神	['消食', '安神', '补益', '理气']
归脾汤	['白术', '当归', '茯苓', '黄芪', '远志', '龙眼肉', '酸枣仁', '人参', '木香', '炙甘草']	益气补血、健脾养心	['消食', '安神', '补益', '理气']
酸枣仁汤	['酸枣仁', '甘草', '知母', '茯苓', '川芎']	益气补血、健脾养心	['消食', '安神', '补益', '理气']
归脾汤	['白术', '当归', '茯苓', '黄芪', '远志', '龙眼肉', '酸枣仁', '人参', '木香', '甘草']	益气补血、健脾养心	['消食', '安神', '补益', '理气']
归脾汤	['白术', '当归', '茯苓', '黄芪', '龙眼肉', '远志', '酸枣仁', '人参', '木香', '炙甘草']	益气补血、健脾养心	['消食', '安神', '补益', '理气']
归脾汤	['白术', '当归', '茯苓', '黄芪', '远志', '龙眼肉', '酸枣仁', '人参', '木香', '炙甘草']	益气补血、健脾养心	['消食', '安神', '补益', '理气']
生脉散合逍遥散加减	['党参', '茯苓', '白术', '白芍', '当归', '川芎', '合欢皮', '柴胡', '黄芪', '麦冬', '五味子', '甘草']	疏肝健脾、益气养阴、养心安神	['消食', '安神', '补益', '理气']
归脾汤	['白术', '当归', '茯苓', '黄芪', '远志', '龙眼肉', '酸枣仁', '人参', '木香', '甘草', '生姜', '大枣']	益气补血、健脾养心	['消食', '安神', '补益', '理气']
归脾汤	['白术', '当归', '茯苓', '黄芪', '远志', '龙眼肉', '酸枣仁', '人参', '木香', '炙甘草']	益气补血、健脾养心	['消食', '安神', '补益', '理气']
归脾汤	['白术', '当归', '茯神', '黄芪', '远志', '龙眼肉', '酸枣仁', '人参', '木香', '炙甘草', '生姜', '大枣']	益气补血、健脾养心	['消食', '安神', '补益', '理气']
回阳救急汤	['人参', '白术', '肉桂', '陈皮', '干姜', '茯苓', '半夏', '附子', '五味子', '炙甘草', '生姜']	回阳补阴、通关利窍、温中散寒	['温里']
通脉四逆汤	['生附子', '干姜', '炙甘草']	破阴回阳、通达内外	['温里']
鹿茸固涩丸	['人参', '黄芪', '菟丝子', '桑螵蛸', '莲肉', '茯苓', '肉桂', '山药', '附子', '鹿茸', '桑叶', '龙骨', '补骨脂', '五味子']	温肾固摄	['温里']
固真汤	['制附', '肉桂', '人参', '茯苓', '白术', '山药', '黄芪', '炙甘草']	温肾固本	['温里']
益气活血熄风汤	['黄芪', '丹参', '三七', '川芎', '白芍', '羚羊角', '葛根']	益气活血通脉、平肝熄风镇痉	['温里', '治风', '理血', '理气']
小续命汤	['麻黄', '桂枝', '甘草', '生姜', '人参', '川芎', '白术', '附子', '防己', '芍药', '黄芩', '防风']	益气养血、祛风散寒、温阳通脉	['温里', '治风', '补益', '理气']
补气消痰饮	['党参', '白术', '茯苓', '熟地黄', '山茱萸', '肉桂', '砂仁', '益智仁', '半夏', '陈皮', '神曲', '白芥子']	益气温阳、健脾强肾	['温里', '消食', '理气']
脑脉宁胶囊	['黄芪', '水蛭', '凌霄花', '泽泻', '菖蒲', '胆南星']	益气活血通脉、消瘀散结降浊	['温里', '祛痰', '理血', '理气']
振颓汤加减	['红参', '白术', '当归', '杜仲', '淫羊藿', '巴戟天', '肉苁蓉', '制乳香', '鹿茸', '蜈蚣', '乌梅']	益气化痰、温阳通络	['温里', '祛痰', '理血', '理气']
化痰益气活血通络汤	['黄芪', '葛根', '丹参', '牡蛎', '胆南星', '川芎', '红花', '鸡血藤', '桂枝', '全蝎', '地龙', '蜈蚣']	益气活血、化痰散瘀、舒筋活络通脉	['温里', '祛痰', '理血', '理气']
通脉舒络汤	['黄芪', '红花', '川芎', '地龙', '牛膝', '丹参', '桂枝', '山楂']	益气活血、通脉舒络、排滞荡邪、祛痰生新	['温里', '祛痰', '理血', '理气']
补阳还五益气化瘀汤	['黄芪', '鸡血藤', '地龙', '当归', '川芎', '赤芍', '桃仁', '红花', '丹参', '乌梢蛇', '钩藤', '天麻', '水蛭']	益气活血、通脉活络、排瘀荡滞、祛瘀生新	['温里', '祛痰', '理血', '理气']
通脉舒络汤	['黄芪', '红花', '川芎', '地龙', '牛膝', '丹参', '桂枝', '山楂']	益气活血、通脉舒络、排滞荡邪、祛瘀生新	['温里', '祛痰', '理血', '理气']
补阳还五益气化瘀汤	['黄芪', '鸡血藤', '地龙', '当归', '川芎', '赤芍', '桃仁', '红花', '丹参', '乌梢蛇', '钩藤', '天麻', '水蛭']	益气活血、通脉活络、排瘀荡滞、祛瘀生新	['温里', '祛痰', '理血', '理气']
少腹逐瘀汤加减	['小茴香', '干姜', '延胡索', '没药', '当归', '川芎', '官桂', '赤芍', '蒲黄', '五灵脂']	化瘀散结、温阳散寒	['温里', '祛痰', '理血', '理气']
保元汤加味	['黄芪', '太子参', '丹参', '淫羊藿']	益气温阳、理气化痰	['温里', '祛痰', '理气']
韩文忠经验方	['附子', '黄芪', '地龙', '水蛭', '麦冬']	益气温阳、活血利水	['温里', '祛湿', '理血', '理气']
益气通脉方	['黄芪', '党参', '当归', '丹参', '地龙', '茯苓', '防己']	益气通脉除湿	['温里', '祛湿', '理气']
防栓汤	['当归', '黄芪', '赤芍', '川芎', '丹参', '地龙', '天麻', '何首乌', '草决明', '山楂']	行气活血、化瘀通脉	['温里', '理血', '理气']
通痹汤	['人参', '麦门冬', '地龙', '全蝎', '僵蚕', '羌活', '防风', '桑寄生', '杜仲', '酸枣仁', '三七']	益气温阳、活血化瘀	['温里', '理血', '理气']
丹参泽兰饮	['川芎', '桃仁', '红花', '赤芍', '白芍', '泽兰', '泽泻', '牛膝']	活血化瘀、益气通脉	['温里', '理血', '理气']
益气通脉汤	['黄芪', '水蛭', '丹参', '川芎', '地龙', '当归', '熟地黄', '三棱']	益气活血通脉	['温里', '理血', '理气']
益气活血温阳汤	['党参', '黄芪', '附子', '白术', '干姜', '熟地黄', '半夏', '水蛭', '当归']	益气活血、温阳通脉	['温里', '理血', '理气']
加味柴胡龙牡汤	['柴胡', '半夏', '生姜', '大枣', '龙骨', '牡蛎', '大黄', '茯苓', '白芍', '黄芩']	理气通脉、活血化瘀	['温里', '理血', '理气']
益气活血方	['秦艽', '川芎', '地龙', '桃仁', '红花', '水蛭', '赤芍', '丹参', '全蝎']	益气活血、化瘀通脉	['温里', '理血', '理气']
黄芪赤风汤加味	['黄芪', '桑寄生', '牛膝', '益母草', '珍珠母', '赤芍', '杜仲', '丹参', '当归', '防风', '乌药']	益气活血、化瘀通脉、	['温里', '理血', '理气']
黄芪桂枝五物汤合沙参麦冬汤	['黄芪', '桂枝', '白芍', '牡丹皮', '丹参', '赤芍', '生地黄', '川芎', '川牛膝', '麦冬', '砂仁', '山药', '北沙参']	益气温阳、活血通络	['温里', '理血', '理气']
益气温阳活血汤	['黄芪', '桂枝', '当归', '赤芍', '川芎', '丹参', '生地黄', '川牛膝', '地龙', '僵蚕', '熟地黄', '麻黄', '甘草']	益气温阳、活血通络	['温里', '理血', '理气']
益气活血祛风汤	['黄芪', '桂枝', '当归', '红花', '僵蚕', '赤芍', '丹参', '鸡血藤', '地龙', '水蛭', '甘草']	益气温阳、活血化瘀	['温里', '理血', '理气']
柴胡疏肝散加减	['赤芍', '川芎', '柴胡', '木香', '陈皮', '丹参', '当归', '白芍', '枳壳', '山楂', '甘草']	疏肝理气、化瘀通脉	['温里', '理血', '理气']
理中汤	['人参', '白术', '干姜', '甘草']	益气散寒、温中降逆	['温里', '理气']
奚氏益气通脉片	['黄芪', '党参', '荜薢', '当归']	益气通脉	['温里', '理气']
金芪饮水	['黄芪', '太子参', '当归', '升麻', '益智仁', '覆盆子', '金樱子', '山茱萸', '淫羊藿']	益气温阳、固涩缩尿	['温里', '理气']
益脑灵口服液	['黄精', '黄芪', '麝香', '水蛭', '刘寄奴', '菖蒲', '川芎', '益智仁', '骨碎补', '僵蚕']	益气活血、开窍化瘀通脉	['温里', '开窍', '理血', '理气']
参附龙牡汤加减	['人参', '附子', '生姜', '大枣', '龙骨', '牡蛎', '川芎']	益气复脉、回阳救逆	['温里', '救急', '补益', '理气']
黄芪桂枝五物汤加减	['黄芪', '肉桂', '桂枝', '赤芍', '白芍', '牛膝', '石斛', '丹参', '葛根', '干姜', '大枣']	益气温经、和血通络	['温里', '和解', '理血', '理气']
黄芪桂枝五物汤加减	['黄芪', '桂枝', '芍药', '桃仁', '红花', '川芎', '赤芍', '全蝎', '地龙', '生姜', '大枣']	益气温经、和血通痹	['温里', '和解', '理气']
黄芪桂枝五物汤加减	['黄芪', '桂枝', '芍药', '桃仁', '红花', '川芎', '赤芍', '全蝎', '地龙', '生姜', '大枣']	益气温经、和血痛痹	['温里', '和解', '理气']
黄芪桂枝五物汤	['黄芪', '芍药', '桂枝', '生姜', '大枣']	益气温经、和营通痹	['温里', '和解', '理气']
黄芪桂枝五物汤	['黄芪', '桂枝', '芍药', '生姜', '大枣']	益气温经、和血通痹	['温里', '和解', '理气']
黄芪桂枝五物汤	['黄芪', '白芍', '桂枝', '生姜', '大枣']	益气温经、和血通痹	['温里', '和解', '理气']
沉香降气散	['沉香', '木香', '丁香', '藿香叶', '人参', '甘草', '白术', '白檀', '肉豆蔻', '砂仁', '桂花', '槟榔', '陈皮', '青皮', '白豆蔻', '茯苓', '干姜', '枳实']	理气降逆、温中和胃	['温里', '和解', '理气']
参附汤	['人参', '附子']	益气回阳、固脱通神	['温里', '固涩', '理气']
参附汤加味	['人参', '附子', '三七']	益气回阳固脱	['温里', '固涩', '理气']
参附汤	['人参', '附子', '生姜', '大枣', '麦冬', '五味子']	益气回阳、救阴固脱	['温里', '固涩', '理气']
参附汤合生脉散加减	['人参', '附子', '麦冬', '五味子']	益气回阳、救阴固脱	['温里', '固涩', '理气']
参附汤加味	['黄芪', '太子参', '当归', '附子', '干姜', '炙甘草']	益气回阳固脱	['温里', '固涩', '理气']
参附汤	['红参', '附子']	益气回阳、扶正固脱	['温里', '固涩', '补益', '理气']
参附汤	['人参', '附子']	益气回阳、扶正固脱	['温里', '固涩', '补益', '理气']
芪棱汤	['黄芪', '三棱', '莪术', '天麻', '地龙', '牛膝', '枳壳', '枸杞子', '桑椹', '天花粉', '豨莶草', '杜仲', '鸡血藤', '水蛭', '甘草']	益气养阴、活血通脉	['温里', '补益', '理血', '理气']
自拟通络活血散、汤	['黄芪', '丹参', '川芎', '水蛭']	补益气血、活血逐瘀通脉	['温里', '补益', '理血', '理气']
易通汤	['黄芪', '当归', '川芎', '桃仁', '鸡血藤', '丝瓜络', '淫羊藿', '肉苁蓉', '肉桂']	益气补血、化瘀通络、温补肾阳	['温里', '补益', '理血', '理气']
活血通络汤	['当归', '白芍', '川芎', '红花', '丹参', '桃仁', '牛膝', '鸡血藤', '乌梢蛇', '白花蛇舌草', '桂枝', '附子', '神曲', '甘草']	益气养血、活血通脉	['温里', '补益', '理血', '理气']
养阴通脑颗粒	['生地黄', '黄芪', '石斛', '葛根', '水蛭', '川芎']	养阴益气、活血通脉	['温里', '补益', '理血', '理气']
活血通痹汤	['黄芪', '丹参', '当归', '石斛', '赤芍', '水蛭', '地龙', '牛膝', '鸡血藤']	益气养阴、温阳活血通络	['温里', '补益', '理血', '理气']
益气温阳通络方	['玄参', '山药', '丹参', '黄芪', '五味子', '杜仲', '葛根', '地骨皮']	益气温阳、活血养血、通络利痹	['温里', '补益', '理血', '理气']
六味回阳饮	['人参', '附子', '干姜', '炙甘草', '熟地黄', '当归']	益气回阳、养血救脱	['温里', '补益', '理气']
六味回阳饮	['人参', '附子', '干姜', '炙甘草', '熟地黄', '当归']	益气回阳、养血救脱	['温里', '补益', '理气']
益气祛毒方	['党参', '桂枝', '肉桂', '制附', '枸杞子', '菟丝子', '黄芪', '银花', '当归', '赤芍', '白术', '甘草', '白扁豆']	益气养血、温补脾肾、清解余毒	['温里', '补益', '理气']
清脑益元汤	['水牛角', '水蛭', '赤芍', '三七', '牛膝', '紫河车', '红景天', '地黄', '制首乌', '肉苁蓉']	益脑生髓、清脑祛瘀	['祛痰']
菖蒲郁金汤	['菖蒲', '栀子', '竹叶', '牡丹皮', '郁金', '连翘', '灯心草', '木通', '竹沥', '金箔']	清营透热祛痰	['祛痰']
桃仁承气汤	['大黄', '芒硝', '桃仁', '当归', '芍药', '牡丹皮']	祛瘀攻下	['祛痰']
祛瘀化痰方	['附子', '半夏', '陈皮', '菖蒲', '远志', '郁金', '当归', '赤芍', '红花', '川芎']	化痰祛瘀	['祛痰']
顺气导痰祛瘀方	['大黄', '枳实', '瓜蒌', '水蛭', '胆南星', '菖蒲', '郁金', '桃仁', '红花']	顺气导痰祛瘀	['祛痰']
化呆汤	['附子', '半夏', '陈皮', '菖蒲', '远志', '郁金', '当归', '赤芍', '红花', '川芎']	化痰祛瘀	['祛痰']
柴胡细辛汤	['柴胡', '细辛', '薄荷', '当归', '土鳖虫', '丹参', '半夏', '川芎', '泽兰', '黄连']	祛瘀生新、调和升降	['祛痰']
清肺祛痰汤	['紫苏子', '浙贝母', '瓜蒌', '紫苑', '款冬花', '旋覆花', '南沙参', '北沙参', '化橘红', '半夏', '茯苓', '甘草']	清肺祛痰	['祛痰']
前胡散	['桑白皮', '前胡', '平贝母', '麦冬', '杏仁', '甘草']	清肺祛痰	['祛痰']
化呆汤	['天竺黄', '胆南星', '半夏', '茯苓', '桔梗', '枳壳', '桃仁', '红花', '赤芍', '丹参', '牛膝']	化痰祛瘀	['祛痰']
星珠散	['南星', '朱砂']	定痫利痰	['祛痰']
桑白皮汤合千金苇茎汤加减	['桑白皮', '大黄', '秦艽', '苇茎', '冬瓜子', '薏苡仁', '桃仁', '红花', '桔梗', '牛膝', '甘草']	清肺泄浊	['祛痰']
自拟停鼾汤	['半夏', '南星', '陈皮', '苍术', '厚朴', '菖蒲', '川芎', '丹参', '甘草']	化痰、祛瘀、停鼾	['祛痰']
桔梗愈鼾汤	['桔梗', '甘草', '海浮石', '山甲', '枳壳', '柴胡', '苦杏仁', '皂角刺']	化痰祛瘀止鼾	['祛痰']
启膈散	['南沙参', '丹参', '茯苓', '川贝母', '郁金', '砂仁壳', '荷叶蒂', '杵头糠']	润燥解郁、化痰降逆	['祛痰', '治燥', '理气']
半夏白术天麻汤	['天麻', '茯苓', '陈皮']	燥湿化痰、平肝熄风	['祛痰', '治风', '祛湿']
天龙定痫汤1号	['天麻', '地龙', '秦艽', '木瓜', '鸡血藤', '菖蒲', '远志', '僵蚕', '全蝎', '琥珀']	平肝除湿、潜阳定痫	['祛痰', '治风', '祛湿']
天龙定痫汤二号	['天麻', '地龙', '秦艽', '木瓜', '鸡血藤', '半夏', '胆南星', '白芥子', '菖蒲', '茯神', '僵蚕', '全蝎', '琥珀']	平肝除湿、豁痰定痫	['祛痰', '治风', '祛湿']
半夏白术天麻汤	['半夏', '白术', '天麻', '陈皮', '茯苓', '甘草', '生姜', '大枣', '蔓荆子']	燥湿化痰、平肝息风	['祛痰', '治风', '祛湿']
白术附子汤之变方加味	['苍术', '制川乌', '炙甘草', '生姜', '威灵仙', '大枣', '干姜', '细辛', '当归', '川芎', '红花', '桃仁']	祛风燥湿化痰、活血通络	['祛痰', '治风', '祛湿', '理血']
化痰祛风汤	['天麻', '半夏', '陈皮', '茯苓', '胆南星', '天竺黄', '桃仁', '红花', '赤芍', '川芎', '当归', '地龙', '全蝎']	祛风除湿、豁痰通络	['祛痰', '治风', '祛湿', '理血']
小活络丹	['川乌', '草乌', '地龙', '天南星', '乳香', '没药']	祛风除湿、化痰通络、活血止痛	['祛痰', '治风', '祛湿', '理血']
小活络丹	['川乌', '草乌', '地龙', '天南星', '乳香', '没药']	祛风除湿、化痰通络、活血止痛	['祛痰', '治风', '祛湿', '理血']
《湿热论》第四条方	['地龙', '秦艽', '威灵仙', '滑石', '苍耳子', '丝瓜藤', '海风藤', '黄连']	燥湿化痰、祛风通络	['祛痰', '治风', '祛湿', '理血']
加味温胆汤	['枳实', '竹茹', '半夏', '陈皮', '大枣', '茯苓', '甘草', '丹参', '菖蒲', '郁金', '钩藤', '僵蚕', '全蝎']	清热化痰、活血开窍、镇痉熄风	['祛痰', '治风', '理血', '开窍', '清热']
抑痫散	['白花蛇舌草', '珍珠', '羚羊角', '西红花', '全蝎', '菖蒲', '人参', '黄芪', '白芍', '胆南星', '天竺黄', '沉香', '柴胡', '金钱莲']	清热平肝、豁痰开窍、熄风定惊、通经活络	['祛痰', '治风', '理血', '开窍', '清热']
治痫灵	['胆南星', '蜈蚣', '全蝎', '地龙', '菖蒲', '红花', '川芎', '僵蚕', '熊胆', '冰片']	活血化瘀、清热化痰、息风止痉、开窍宁神	['祛痰', '治风', '理血', '开窍', '清热']
风饮汤	['龙骨', '牡蛎', '桂枝', '寒水石', '滑石', '石膏', '赤石脂', '白石脂', '干姜', '大黄', '紫石英', '甘草']	滋阴潜阳、化痰行瘀	['祛痰', '治风', '补益']
大定风珠	['白芍', '阿胶', '生龟甲', '干地黄', '麻仁', '五味子', '生牡蛎', '麦冬', '炙甘草', '鸡子黄', '鳖甲']	育阴潜阳、熄风定痫	['祛痰', '治风', '补益']
葛地枣丹汤	['白芍', '葛根', '生地黄', '酸枣仁', '丹参', '当归', '陈皮', '菊花', '牡丹皮', '天麻']	滋阴潜阳、柔肝息风、除痰祛瘀	['祛痰', '治风', '补益']
首蛭合剂	['制首乌', '水蛭', '天冬', '桃仁', '菖蒲', '胆南星', '豨莶草', '牛膝']	滋阴活血化瘀、熄风化痰通络	['祛痰', '治风', '补益', '理血']
中风回春汤	['当归', '党参', '川芎', '赤芍', '桃仁', '红花', '丹参', '地龙', '水蛭', '胆南星', '菖蒲', '鸡血藤']	补气活血、祛痰熄风	['祛痰', '治风', '补益', '理血']
龙牡熄风汤加味	['牡蛎', '牛膝', '地龙', '天麻', '钩藤']	补养肝肾、平肝熄风、化痰通络	['祛痰', '治风', '补益', '理血']
小续命汤加味	['麻黄', '桂枝', '杏仁', '石膏', '人参', '当归', '川芎', '干姜', '甘草', '地龙', '全蝎', '瓜蒌']	扶正祛邪、疏风通络、平肝止痉、祛瘀化痰	['祛痰', '治风', '补益', '理血']
加味止痉散	['全蝎', '桃仁', '当归', '白芍', '蜈蚣', '黄芪', '生地黄']	活血化瘀、补气通络、熄风化痰	['祛痰', '治风', '补益', '理血']
祛瘀定痫合剂合蝎蜈胶囊	['全蝎', '蜈蚣', '地龙', '白芍', '丹参', '铁落', '菖蒲', '远志', '天南星', '川芎', '红花']	柔肝熄风、化痰定痫、活血化瘀	['祛痰', '治风', '补益', '理血']
匡罢汤	['生地黄', '白芍', '麦冬', '石斛', '酸枣仁', '炙甘草', '石决明', '天麻', '全蝎', '附子', '菖蒲', '天竺黄', '茯苓', '僵蚕']	滋阴息风、活血化痰通络	['祛痰', '治风', '补益', '理血']
三甲复脉汤	['炙甘草', '干地黄', '白芍', '麦冬', '阿胶', '麻仁', '生牡蛎', '鳖甲', '生龟甲']	滋养肺肾、息风化痰活血	['祛痰', '治风', '补益', '理血']
祛痰活血止眩汤	['半夏', '茯苓', '陈皮', '天麻', '黄芪', '川芎', '蔓荆子', '葛根', '丹参', '赤芍', '地龙']	健脾化痰祛风、补气活血通络	['祛痰', '治风', '补益', '理血', '消食']
当归秦艽汤	['秦艽', '当归', '何首乌', '鸡血藤', '赤芍', '生地黄', '川芎', '桃仁', '羌活', '独活', '菖蒲', '远志', '山茱萸', '木瓜']	养阴活血化瘀、祛风清热化痰	['祛痰', '治风', '补益', '理血', '清热']
脑出血二号方	['水半夏', '半夏', '陈皮', '黄芩', '夏枯草', '钩藤', '地龙', '白芍', '胆南星', '大黄', '麦冬', '玄参']	清热熄风、化痰通络、清热生津	['祛痰', '治风', '补益', '理血', '清热']
门纯德经验方	['羚羊角', '钩藤', '桑叶', '生地黄', '菊花', '白芍', '茯苓', '竹茹', '生石膏', '生龟甲', '甘草', '大黄', '土三七']	滋阴清热、凉血熄风化痰	['祛痰', '治风', '补益', '理血', '清热']
天麻首乌汤	['天麻', '何首乌', '当归', '肉苁蓉', '桑寄生', '生地黄', '地龙', '丹参', '牛膝', '白芷', '胆南星']	滋补肝肾、息风通络、化痰开窍、活血化瘀	['祛痰', '治风', '补益', '理血', '开窍']
疏脑健步汤	['羚羊角', '菖蒲', '郁金', '半夏', '天竺黄', '川芎', '牛膝', '地龙', '水蛭', '大黄', '黄芪']	熄风化痰、醒脑开窍、逐瘀通络、扶正补虚	['祛痰', '治风', '补益', '理血', '开窍']
中药口腔点含液	['菖蒲', '白芥子', '皂荚', '细辛', '防风', '龟甲', '乌梅', '半夏', '天麻', '冰片']	滋阴熄风、化痰通络开窍	['祛痰', '治风', '补益', '理血', '开窍']
泄热汤加减	['大黄', '芒硝', '冰片', '黄芩', '黄连', '黄柏', '栀子', '金银花', '连翘', '知母', '麦冬', '甘草']	滋阴潜阳、清热息风、活血化痰、醒脑开窍	['祛痰', '治风', '补益', '理血', '开窍', '清热']
利水解毒汤加减	['泽泻', '半边莲', '益母草', '茯苓', '桂枝', '甘草']	利水泄浊、解毒通络	['祛痰', '痈疡', '祛湿', '理血']
龙苍汤	['苍耳子', '龙胆草', '夏枯草', '石决明', '菊花', '生地黄', '木贼', '防风', '羌活', '桑白皮', '大黄', '蝉蜕']	清热祛风、通腑泄浊、镇肝潜阳、熄风止痛	['祛痰', '泻下', '治风', '理血', '清热']
潘龙经验方	['半夏', '陈皮', '钩藤', '黄芩', '天竺黄', '胆南星', '大黄', '牛膝', '三七']	通腑化痰、清热熄风、开窍醒神	['祛痰', '泻下', '治风', '开窍', '清热']
桃仁复苏汤加减	['桃仁', '大黄', '甘草', '玄明粉', '桂枝', '龙骨', '牡蛎', '茯神', '菖蒲', '远志', '蜈蚣']	活血化痰、通腑解毒、潜阳开窍	['祛痰', '泻下', '痈疡', '治风', '理血', '开窍']
周义杰经验方	['大黄', '半夏', '茯苓', '陈皮', '胆南星', '竹茹', '天竺黄', '菖蒲', '远志', '石决明', '桃仁', '红花', '川芎', '赤芍', '全蝎', '僵蚕', '地龙', '水蛭']	行瘀导滞、通腑解毒、涤痰通络、开窍醒神	['祛痰', '泻下', '痈疡', '理血', '开窍']
调气息风汤	['枳实', '菖蒲', '郁金', '水蛭', '大黄']	调理气机、化痰逐瘀、清心开窍、通腑泄热	['祛痰', '泻下', '理血', '开窍', '清热']
化痰通腑口服液	['桃仁', '川芍', '赤芍', '丹参', '牛膝', '大黄', '芒硝', '郁金', '石菖蒲', '胆南星']	活血化瘀、化痰通窍、通腑泻热	['祛痰', '泻下', '理血', '开窍', '清热']
大黄生地汤	['大黄', '生地黄']	凉血养阴、通腑泄浊、活血通络	['祛痰', '泻下', '补益', '理血']
肾衰三号方	['大黄', '附子', '桂枝', '赤芍', '丹参', '龙骨', '牡蛎', '枳壳']	温阳益肾、通腑泄浊、活血化瘀	['祛痰', '泻下', '补益', '理血', '温里']
半夏白术天麻汤	['半夏', '白术', '天麻', '陈皮', '茯苓', '甘草', '生姜', '大枣', '蔓荆子']	燥湿祛痰、健脾和胃	['祛痰', '消食', '祛湿', '和解']
二陈汤	['半夏', '陈皮']	燥湿化痰、健脾和胃	['祛痰', '消食', '祛湿', '和解']
二陈汤	['半夏', '陈皮', '茯苓', '甘草']	燥湿化痰、健脾和胃	['祛痰', '消食', '祛湿', '和解']
三生丸	['半夏', '南星', '附子']	燥湿化痰	['祛痰', '祛湿']
二陈汤加减	['陈皮', '半夏', '生姜', '茯苓', '焦山楂']	化痰祛湿减脂	['祛痰', '祛湿']
降脂黏汤一号	['丹参', '当归', '益母草', '泽泻', '瓜蒌', '薤白', '檀香', '陈皮', '半夏', '延胡索']	祛湿化痰降脂	['祛痰', '祛湿']
活瘀降脂饮	['丹参', '牡丹皮', '赤芍', '川芎', '田三七', '水蛭', '猪苓', '泽泻', '山楂']	疏通脉道、活瘀降脂	['祛痰', '祛湿']
双降汤	['水蛭', '黄芪', '丹参', '山楂', '豨莶草', '广地龙', '当归', '赤芍', '川芎', '泽泻', '甘草']	祛瘀降压、降脂降粘、	['祛痰', '祛湿']
三降汤	['玳瑁', '槐花', '栀子', '茵陈', '葛根', '珍珠母', '白芍', '夏枯草', '佩兰', '皂角刺', '银杏叶', '丹参', '山楂', '甘草']	清热泻浊、祛湿化痰、潜阳平肝、化瘀通络、	['祛痰', '祛湿', '治风', '理血', '清热']
神仙解语丹	['附子', '菖蒲', '远志', '天麻', '全蝎', '羌活', '僵蚕', '南星']	化湿祛痰开窍、通经活络、平肝息风	['祛痰', '祛湿', '治风', '理血', '开窍']
马海治瘫丸	['马钱子', '当归', '水蛭', '海风藤', '黄芪', '千年健', '大黄']	补气活血、祛风除湿、化痰通络	['祛痰', '祛湿', '治风', '补益', '理血']
李斯炽经验方	['半夏', '茯苓', '竹茹', '牡蛎', '白芍', '枳实', '钩藤', '桑枝', '牛膝', '菖蒲', '郁金', '天花粉', '瓜蒌', '琥珀', '冬瓜仁', '甘草']	养肝潜阳利湿、豁痰开窍通络	['祛痰', '祛湿', '治风', '补益', '理血', '开窍']
中风解毒1号方	['大黄', '知母', '栀子', '泽泻', '葶苈子', '蒲黄', '胆南星', '麝香', '甘草']	通腑清热、利水泄毒、活血祛毒、豁痰化毒	['祛痰', '祛湿', '泻下', '理血', '清热']
涤痰汤	['胆南星', '半夏', '枳实', '茯苓', '菖蒲', '人参']	除湿化痰通络	['祛痰', '祛湿', '理血']
小活络丹	['制川乌', '制草乌', '地龙', '制天南星', '乳香', '没药']	温化活络、搜风祛湿、祛痰逐瘀	['祛痰', '祛湿', '理血']
止麻消痰饮	['天麻', '半夏', '陈皮', '茯苓', '细辛', '枳壳', '栝楼', '桔梗', '黄连', '黄芩']	燥湿化痰、散瘀通络	['祛痰', '祛湿', '理血']
二陈汤加减	['半夏', '陈皮', '茯苓', '炙甘草', '生姜', '川芎', '乌梅']	燥湿化痰、通络止痛	['祛痰', '祛湿', '理血']
温胆汤合桃红四物汤加减	['丹参', '生地黄', '当归', '半夏', '赤芍', '茯苓', '竹茹', '陈皮', '桃仁', '红花', '胆南星', '甘草']	祛湿化痰、活血化瘀	['祛痰', '祛湿', '理血']
当归芍药散	['当归', '白芍', '川芎', '茯苓', '白术', '泽泻']	活血化瘀通络、利湿化痰	['祛痰', '祛湿', '理血']
活血降脂汤	['当归', '葛根', '红花', '山楂', '决明子', '大黄', '枳壳', '白芍', '地龙', '瓜蒌', '枸杞子', '丹参', '荷叶', '白术', '党参', '茯苓']	活血通络、降脂化浊	['祛痰', '祛湿', '理血']
通脉汤	['胆南星', '川贝母', '黄芩', '杏仁', '薏苡仁', '半夏', '枳实', '滑石', '桃仁', '丹参', '川芎', '泽兰', '鸡内金']	祛湿化痰、活血通脉	['祛痰', '祛湿', '理血', '温里']
定眩汤	['天麻', '半夏', '陈皮', '茯苓', '白术', '葛根', '川芎', '丹参', '甘草']	燥湿化痰、益气活血	['祛痰', '祛湿', '理血', '理气']
自拟逐水醒脑汤	['黄芩', '栀子', '龙胆草', '夏枯草', '僵蚕', '全蝎', '牛膝', '远志', '菖蒲', '大黄', '羌活', '防风']	清热利湿、活血化瘀、化痰开窍	['祛痰', '祛湿', '理血', '开窍', '清热']
指迷茯苓丸	['茯苓', '枳壳', '半夏', '芒硝']	燥湿和中、化痰通络	['祛痰', '祛湿', '理血', '和解']
加味温胆汤	['陈皮', '半夏', '茯苓', '枳壳', '竹茹', '甘草']	燥湿化痰、降逆止呕	['祛痰', '祛湿', '理气']
导痰汤	['半夏', '陈皮', '茯苓', '枳实', '胆南星', '甘草']	燥湿豁痰、行气开郁	['祛痰', '祛湿', '理气']
二陈汤	['半夏', '陈皮', '茯苓', '乌梅', '生姜', '甘草']	燥湿祛痰、行气开郁	['祛痰', '祛湿', '理气']
导痰汤	['半夏', '天南星', '陈皮', '茯苓', '枳实', '生姜']	燥湿祛痰、行气开郁	['祛痰', '祛湿', '理气']
指迷茯苓丸	['茯苓', '枳壳', '半夏', '芒硝']	燥湿化痰、行气散结	['祛痰', '祛湿', '理气']
化痰降浊汤	['半夏', '陈皮', '竹茹', '菖蒲', '丹参', '白术', '山楂', '枳实', '鸡内金', '川芎', '木香']	祛湿化痰、行气解郁	['祛痰', '祛湿', '理气']
导痰汤	['半夏', '胆南星', '陈皮', '枳实', '茯苓', '甘草']	燥湿化痰、理气消痞	['祛痰', '祛湿', '理气']
苏子降气汤化裁	['苏子', '半夏', '前胡', '厚朴', '肉桂', '甘草', '当归']	燥湿化痰、行气降逆	['祛痰', '祛湿', '理气']
逍遥降脂饮	['柴胡', '当归', '白芍', '茯苓', '牡丹皮', '泽泻', '白术', '薄荷', '山楂', '川佛手', '甘草']	疏肝平肝、育阴降脂	['祛痰', '祛湿', '理气', '治风', '补益']
降糖汤	['僵蚕', '莱菔子', '泽泻', '黄芪', '当归', '山楂', '白菊花', '钩藤', '枸杞子', '夏枯草', '绿茶']	养阴益气、化痰祛瘀、平肝熄风、清热利湿	['祛痰', '祛湿', '理气', '治风', '补益', '清热']
硝矾洗药	['芒硝', '硼砂', '明矾']	清热解毒、消肿软坚、燥湿收敛	['祛痰', '祛湿', '理气', '痈疡', '理血', '清热']
活血涤痰汤	['丹参', '黄芪', '枸杞子', '银杏叶', '何首乌', '天麻', '菖蒲', '川芎', '泽泻', '竹茹', '葛根', '地龙', '大黄']	益气活血、利水通腑、豁痰醒脑	['祛痰', '祛湿', '理气', '泻下', '理血', '开窍']
逍遥散	['当归', '白芍', '柴胡', '茯苓', '白术', '生姜', '薄荷']	疏肝健脾、化痰除湿、行气活血	['祛痰', '祛湿', '理气', '理血', '消食']
苏合香丸	['苏合香', '冰片', '麝香', '安息香', '青木香', '香附', '白檀香', '丁香', '沉香', '荜茇', '乳香', '白术', '诃子', '朱砂', '水牛角']	芳香开窍、行气止痛、顺气化痰、解郁开窍	['祛痰', '祛湿', '理气', '理血', '开窍']
疏利降浊汤	['柴胡', '黄芩', '半夏', '生姜', '泽泻', '茯苓', '白术', '桂枝', '党参', '桑寄生', '虎杖', '益母草']	扶正达邪、疏调三焦、利湿清热、降逆泄浊	['祛痰', '祛湿', '理气', '补益', '清热']
龙归汤	['地龙', '当归', '水蛭', '川芎', '三七', '黄芪', '天麻', '枸杞子', '菊花', '泽泻', '茯苓']	益气活血、化浊涤痰、滋补肝肾	['祛痰', '祛湿', '理气', '补益', '理血']
黄连温胆汤加减	['黄连', '半夏', '陈皮', '茯苓', '枳实', '竹茹', '黄芪', '白花蛇舌草']	清热燥湿、理气化痰、和胃利胆	['祛痰', '祛湿', '和解', '理气', '清热']
黄连温胆汤	['川连', '竹茹', '枳实', '半夏', '陈皮', '甘草', '生姜', '茯苓']	清热燥湿、理气化痰、和胃利胆	['祛痰', '祛湿', '和解', '理气', '清热']
黄连温胆汤	['黄连', '竹茹', '半夏', '茯苓', '陈皮', '枳实', '生姜', '炙甘草', '大枣']	清热燥湿、理气化痰、和胃利胆	['祛痰', '祛湿', '和解', '理气', '清热']
海藻降脂方	['海藻', '菟丝子', '柿树叶', '葛根', '海蛤壳']	补肾通络降脂	['祛痰', '祛湿', '补益', '理血']
参葛降脂宁	['丹参', '葛根', '何首乌', '黄芪', '枸杞子', '山楂']	滋补肝肾、活血降脂、	['祛痰', '祛湿', '补益', '理血']
银翘散	['连翘', '银花', '桔梗', '薄荷', '竹叶', '甘草', '荆芥穗', '淡豆豉', '牛蒡子', '竹茹', '川贝母', '天竺黄', '川芎']	疏风清热、宣肺化痰	['祛痰', '清热', '治风', '解表']
膏淋汤	['山药', '芡实', '生龙骨', '生牡蛎', '生地黄', '党参', '白芍']	清热利湿、分清泄浊	['祛痰', '清热', '祛湿']
槐米浮萍胶囊	['槐花', '浮萍', '水蛙', '乳香', '没药', '茯苓', '白鲜皮', '蛇床子', '牛膝', '黄芩', '苦参', '甘草']	清热利湿、活血祛瘀	['祛痰', '清热', '祛湿', '理血']
黄连温胆汤	['川连', '竹茹', '枳实', '半夏', '陈皮', '甘草', '生姜', '茯苓']	清热燥湿、理气化痰	['祛痰', '清热', '祛湿', '理气']
蒿芩清胆汤加减	['青蒿', '竹茹', '半夏', '赤茯苓', '黄芩', '枳壳', '陈皮', '滑石', '甘草', '青黛', '桔梗', '牛膝']	清热祛湿、化痰止咳	['祛痰', '清热', '祛湿', '解表']
生脉散加减	['人参', '麦冬', '五味子', '黄芪', '栝楼', '陈皮', '平贝母', '枳实', '竹茹', '胆南星']	清热祛湿、化痰止咳	['祛痰', '清热', '祛湿', '解表']
脑出血1号方	['桑寄生', '金银花', '槐花', '生地黄', '地龙', '鸡血藤', '钩藤', '菊花', '当归', '陈皮', '胆南星', '川贝母', '全蝎']	滋阴平阳、化痰泻火、	['祛痰', '清热', '补益']
侯氏黑散加味汤	['菊花', '矾石', '防风', '白术', '党参', '黄芩', '川芎', '当归', '茯苓', '牡蛎', '桂枝', '桔梗', '细辛', '干姜']	清肝潜阳、化痰通络、祛风活血	['祛痰', '明目', '治风', '理血', '清热']
侯氏黑散	['菊花', '白术', '细辛', '茯苓', '牡蛎', '桔梗', '防风', '人参', '矾石', '黄芩', '当归', '干姜', '川芎', '桂枝']	清肝祛风、化痰通络	['祛痰', '明目', '治风', '理血', '清热']
羚角钩藤汤	['羚羊角', '钩藤', '桑叶', '川贝母', '生地黄', '竹茹', '菊花', '白芍', '茯神', '甘草']	凉肝熄风、化痰通络	['祛痰', '明目', '治风', '理血', '清热']
脑衄汤	['羚羊角', '钩藤', '水牛角', '生地黄', '牡丹皮', '栀子', '白芍', '陈皮', '竹茹', '三七', '甘草']	凉肝熄风、化痰开窍	['祛痰', '明目', '治风', '开窍', '清热']
凉血醒脑息风汤	['羚羊角', '益母草', '茯苓', '茜草', '葛根', '菖蒲', '钩藤', '当归', '白芍', '菊花', '胆南星', '大黄', '竹茹']	清肝息风、化痰醒脑	['祛痰', '明目', '治风', '开窍', '清热']
羚角钩藤汤	['羚羊角', '钩藤', '桑叶', '川贝母', '生地黄', '竹茹', '菊花', '白芍', '茯神', '甘草']	凉肝熄风、祛痰宁心	['祛痰', '明目', '安神', '治风', '清热']
痰瘀饮	['丹参', '半夏', '瓜蒌皮', '浙贝母', '川芎', '胆南星', '天麻']	祛瘀通络、活血化瘀	['祛痰', '理血']
化痰通络方	['菖蒲', '远志', '天麻', '全蝎', '羌活', '僵蚕', '桔梗', '官桂', '木香', '甘草']	化痰通络	['祛痰', '理血']
祛瘀清腑汤	['桃仁', '红花', '大黄', '赤芍', '钩藤', '决明子', '地龙', '牛膝', '竹沥']	活血祛瘀、清腑泻下	['祛痰', '理血']
黄连温胆汤合桃红四物汤加减	['黄连', '陈皮', '茯苓', '半夏', '枳实', '竹茹', '桃仁', '红花', '川芎', '生地黄', '白芍', '当归', '全蝎', '甘草']	豁痰化瘀、通经活络	['祛痰', '理血']
镇眩饮	['天麻', '川芎', '茯苓', '葛根', '当归', '白术']	涤痰化瘀、镇眩通络	['祛痰', '理血']
化痰通络汤	['陈皮', '半夏', '茯苓', '枳实', '竹沥', '胆南星', '天麻', '僵蚕', '全蝎', '地龙', '鸡血藤', '大黄', '甘草', '乌梢蛇']	去风化痰、逐瘀通络	['祛痰', '理血']
苍附导痰汤	['苍术', '香附', '枳实', '胆南星', '僵蚕', '陈皮', '半夏', '茯苓', '甘草', '竹茹', '水蛭', '地龙', '栝楼', '红花']	搜风化痰通络	['祛痰', '理血']
化痰祛瘀汤	['瓜蒌皮', '菖蒲', '郁金', '僵蚕', '地龙', '全蝎', '桃仁', '川芎']	化痰通络、活血祛瘀	['祛痰', '理血']
化痰活血方	['枳壳', '半夏', '胆南星', '茯苓', '竹茹', '菖蒲', '郁金', '川芎', '川楝子', '地龙', '蜈蚣']	活血祛瘀、化痰通络	['祛痰', '理血']
化瘀祛痰通络方	['黄芪', '当归', '赤芍', '丹参', '水蛭', '三七', '川芎', '地龙', '茯苓', '陈皮', '半夏', '白术', '山楂', '甘草']	化瘀祛痰通络	['祛痰', '理血']
涤痰汤	['胆南星', '半夏', '菖蒲', '丹参', '天麻']	化痰通络	['祛痰', '理血']
化痰逐瘀汤	['胆南星', '地龙', '栝楼', '生地黄', '半夏', '水蛭', '川芎', '当归', '赤芍', '桃仁', '红花', '厚朴', '枳实', '甘草']	破血逐瘀、化痰通络	['祛痰', '理血']
通脑汤	['菖蒲', '郁金', '胆南星', '路路通', '川芎', '丹参', '红花', '赤芍', '蜈蚣']	化痰活血通络	['祛痰', '理血']
搜风通络方	['全蝎', '天麻', '赤芍', '川芎', '红花', '丹参', '地龙', '鸡血藤', '菖蒲', '半夏', '甘草']	活血祛瘀、化痰通络	['祛痰', '理血']
化痰消栓方	['全蝎', '丹参', '郁金', '菖蒲', '瓜蒌皮', '远志', '川芎', '桃仁', '甘草']	化痰通络、祛瘀通经	['祛痰', '理血']
中经二号方	['半夏', '白术', '天麻', '胆南星', '丹参', '香附', '大黄']	活血化痰通络	['祛痰', '理血']
身痛逐瘀汤加减	['秦艽', '当归', '地龙', '川芎', '桃仁', '红花', '牛膝', '羌活', '五灵脂', '没药', '甘草', '香附']	活血祛瘀、通络止痛	['祛痰', '理血']
通脉活血汤	['桃仁', '红花', '当归', '川芎', '赤芍', '地龙', '黄芪', '牛膝', '黄柏', '苍术', '薏苡仁', '桂枝', '三棱', '莪术', '大黄', '大黄']	活血通络、祛瘀通经	['祛痰', '理血']
通络活血汤	['川芎', '桃仁', '黄芪', '赤芍', '当归', '红花', '海风藤', '地龙', '全蝎', '牛膝', '甘草']	祛瘀活血通络	['祛痰', '理血']
四虫通络胶囊	['水蛭', '乌梢蛇', '土鳖虫', '地龙', '三七', '丹参', '鸡血藤', '桃仁', '红花', '赤芍', '黄芪', '当归', '僵蚕', '豨莶草', '川芎']	活血祛瘀通络	['祛痰', '理血']
加味血府逐瘀汤	['黄芪', '丹参', '牛膝', '水蛭', '芍药', '枳壳', '桔梗', '地龙', '熟地黄', '川芍', '桃仁', '红花', '当归']	活血化瘀、祛痰排浊	['祛痰', '理血']
化痰通络汤	['半夏', '茯苓', '白术', '天麻', '胆南星', '天竺黄', '陈皮', '大黄', '丹参']	活血化瘀、化痰通络	['祛痰', '理血']
五虫四藤汤	['蜈蚣', '地龙', '乌梢蛇', '土鳖虫', '全蝎', '鸡血藤', '忍冬藤', '络石藤', '钩藤', '黄芪', '丹参']	活血化痰通络	['祛痰', '理血']
通脑复步汤	['黄芪', '白芍', '地龙', '胆南星', '乌梢蛇', '蛰虫', '豨莶草', '白芥子', '玄参', '透骨草', '桃仁', '红花']	化痰活血通络	['祛痰', '理血']
头痛消	['川芎', '丹参', '全蝎', '蜈蚣', '僵蚕', '柴胡', '细辛', '甘草']	活血祛瘀、除风通络、解痉止痛	['祛痰', '理血']
大黄?虫丸汤剂加减	['土鳖虫', '半夏', '水蛭', '白术', '赤芍', '生地黄', '大黄', '桃仁', '天麻']	化瘀祛痰、痰瘀	['祛痰', '理血']
通窍活血方	['水蛭', '桃仁', '赤芍', '丹参', '地龙', '红花', '川芎']	祛瘀通络	['祛痰', '理血']
乌药顺气汤	['乌药', '陈皮', '麻黄', '川芎', '白芷', '桔梗', '枳壳', '僵蚕', '生姜', '炙甘草']	通调运气、消风化痰、活络	['祛痰', '理血']
通经活血汤	['当归', '川芎', '桃仁', '秦艽', '苍术', '牛膝', '没药', '桑枝', '丝瓜络', '首乌藤', '鸡血藤', '甘草', '黄柏', '羌活', '乳香', '地龙', '补骨脂', '红花']	通经活络、散风祛痰	['祛痰', '理血']
愈风丸	['川乌', '草乌', '苍术', '白芷', '当归', '天麻', '防风', '荆芥穗', '麻黄', '石斛', '何首乌', '羌活', '独活', '甘草', '川芎']	散风化痰、活血止痛	['祛痰', '理血']
涤痰通络汤	['天竺黄', '菖蒲', '远志', '川贝母', '黄芩', '赤芍', '桃仁', '红花', '乌梢蛇', '地龙', '鸡血藤', '川芎']	涤痰通络	['祛痰', '理血']
脑出血二号方	['南星', '半夏', '枳实', '茯苓', '陈皮', '菖蒲', '人参', '竹茹', '甘草']	化痰通络	['祛痰', '理血']
菖蒲丹参方	['丹参', '赤芍', '鸡血藤', '水蛭', '瓜蒌', '胆南星', '豨莶草', '菖蒲', '郁金', '伸筋草']	化痰活血通络	['祛痰', '理血']
化痰活血通络汤	['半夏', '陈皮', '茯苓', '郁金', '菖蒲', '银杏叶', '川芎', '何首乌', '枳壳', '生姜', '甘草', '大枣']	化痰活血通络	['祛痰', '理血']
化瘀止血汤	['黄连', '陈皮', '半夏', '枳实', '竹茹', '胆南星', '菖蒲', '全蝎', '三七', '天麻', '墨旱莲', '丹参', '红花', '牛膝', '茯苓']	祛痰通络、活血化瘀	['祛痰', '理血']
温胆汤加减	['陈皮', '胆南星', '丹参', '茯苓', '白术', '天麻', '枳实', '半夏', '水蛭']	化痰逐瘀	['祛痰', '理血']
加味承气汤	['石膏', '元明粉', '全蝎', '胆南星', '丹参']	活血化瘀、祛痰通络	['祛痰', '理血']
活血化瘀化痰通络方	['三七', '莪术', '蒲黄', '瓜蒌', '半夏', '茯苓', '大黄']	活血化瘀、化痰通络	['祛痰', '理血']
祛痰通滞汤	['天竺黄', '胆南星', '泽泻', '丹参', '红花', '川芎', '地龙', '鸡血藤']	祛瘀活血通滞	['祛痰', '理血']
活血散瘀汤	['川芎', '丹参', '牛膝', '三七', '桃仁']	化痰祛瘀通络	['祛痰', '理血']
通脑复步汤	['黄芪', '白芍', '地龙', '胆南星', '乌梢蛇', '蛰虫', '豨莶草', '白芥子', '玄参', '透骨草', '桃仁', '红花']	化痰活血、通络除痹	['祛痰', '理血']
通脑复步汤	['黄芪', '白芍', '地龙', '胆南星', '乌梢蛇', '蛰虫', '豨莶草', '白芥子', '玄参', '透骨草', '桃仁', '红花']	化痰活血、通络除痹	['祛痰', '理血']
化瘀通络方	['丹参', '桃仁', '红花', '赤芍', '当归', '川芎', '地龙', '僵蚕', '郁金', '菖蒲', '胆南星', '甘草']	活血化瘀、化痰通络	['祛痰', '理血']
活络效灵丹	['当归', '丹参', '乳香', '没药']	活血祛瘀、疏通脉络	['祛痰', '理血']
静栓通	['土鳖虫', '赤芍', '川芎', '熟地黄', '当归', '苏木', '骨碎补', '地龙', '木瓜', '三七', '甘草']	活血祛瘀	['祛痰', '理血']
补肾祛瘀汤	['牛膝', '杜仲', '仙茅', '仙灵脾', '水蛭', '地龙', '穿山甲', '龟甲']	滋肾阴、补肾阳、祛瘀通络	['祛痰', '理血']
大黄止血散	['大黄', '白及', '海螵蛸']	祛瘀、收敛、止血	['祛痰', '理血']
牡蛎泽泻散合二陈汤加减	['牡蛎', '泽泻', '白术', '半夏', '陈皮', '白蔻仁', '茯苓', '车前子', '六月雪', '茯苓', '大黄']	化痰泄浊、活血行瘀	['祛痰', '理血']
桃红四物汤加味	['桃仁', '红花', '当归', '赤芍', '川芎', '生地黄', '丹参', '三七', '蒲黄']	活血化痰通络	['祛痰', '理血']
自拟通络活血汤	['红花', '半夏', '胆南星', '羌活', '独活', '薏苡仁', '川木瓜', '益母草', '赤芍', '白芍']	活血化痰	['祛痰', '理血']
活络效灵丹	['当归', '丹参', '乳香', '没药']	活血祛瘀、通络止痛	['祛痰', '理血']
七厘散	['血竭', '麝香', '冰片', '没药', '红花', '朱砂', '儿茶']	活血祛瘀、止血止痛	['祛痰', '理血']
膈下逐瘀汤	['五灵脂', '当归', '川芎', '桃仁', '牡丹皮', '赤芍', '乌药', '延胡索', '甘草', '香附', '红花', '枳壳']	活血祛瘀	['祛痰', '理血']
王永炎经验方	['茯苓', '半夏', '白术', '天麻', '天竺黄', '胆南星', '紫丹参', '香附子', '大黄']	活血化瘀、化痰通络	['祛痰', '理血']
吞咽方	['当归', '白术', '陈皮', '桑寄生', '地龙', '茯苓', '全蝎', '僵蚕', '胆南星', '砂仁', '川贝母', '三七']	化痰通络	['祛痰', '理血']
化痰定痫方	['当归', '川芎', '桃仁', '红花', '赤芍', '生地黄', '生南星', '天竺黄', '菖蒲', '全蝎', '蜈蚣', '丹参', '钩藤', '半夏', '茯苓', '陈皮', '僵蚕', '龙齿']	活血通络、化痰定痫	['祛痰', '理血']
加减桃红四物汤	['当归', '川芎', '赤芍', '桃仁', '红花', '制没药', '全蝎', '蜈蚣', '地鳖虫', '川牛膝', '大黄', '甘草']	活血祛瘀、通痹止痛	['祛痰', '理血']
活血化瘀汤	['黄芪', '桑寄生', '牛膝', '防风', '木瓜', '独活', '白芍', '川芎', '五灵脂', '没药', '甘草']	活血祛瘀止痛	['祛痰', '理血']
活络效灵丹加味	['山药', '枸杞子', '当归', '丹参', '土鳖虫', '五灵脂', '桃仁', '红花', '乳香', '没药', '三七']	活血祛瘀、通痹止痛	['祛痰', '理血']
桃红四物汤	['当归', '熟地黄', '川芎', '白芍', '桃仁', '红花']	活血祛瘀	['祛痰', '理血']
通脉煎	['丝瓜络', '槟榔', '荷叶', '山楂', '何首乌', '鸡血藤']	补虚固本、祛痰化瘀、	['祛痰', '理血']
血府逐瘀汤加减	['当归', '桃仁', '红花', '枳壳', '牛膝', '川芎', '柴胡', '桔梗', '生地黄', '决明子', '山楂', '丹参', '荷叶', '甘草']	活血祛瘀	['祛痰', '理血']
防瘫丸	['丹参', '当归', '赤芍', '川芎', '桃仁', '黄芪', '何首乌', '泽泻', '石决明', '地龙', '钩藤', '郁金', '菖蒲', '甘草']	祛痰化瘀通络	['祛痰', '理血']
桃红四物汤	['熟地黄', '当归', '白芍', '川芎', '桃仁', '红花', '茯苓', '人参', '甘草', '陈皮', '胆南星', '半夏', '竹茹', '枳实', '菖蒲']	活血化瘀、化痰通络	['祛痰', '理血']
龙胆泻肝汤	['龙胆草', '黄芩', '黑山栀', '泽泻', '车前子', '当归', '生地黄', '柴胡', '甘草', '赤芍', '牡丹皮', '郁金']	清泻肝胆实火、活血祛瘀	['祛痰', '理血']
通脑舒脉饮	['黄芪', '三七', '水蛭', '桃仁', '大黄', '地龙', '红花', '牛膝', '郁金', '石菖蒲', '半夏', '甘草']	活血通脉、化痰祛瘀	['祛痰', '理血', '温里']
通脉汤	['当归', '川芎', '赤芍', '桃仁', '红花', '益母草', '地龙', '丹参', '水蛭']	活血祛瘀通脉	['祛痰', '理血', '温里']
溶栓汤	['当归', '丹参', '地龙', '水蛭', '壁虎', '泽泻', '茯苓']	活血消肿、祛瘀通脉	['祛痰', '理血', '温里']
活血通脉煎	['丹参', '玄参', '当归', '红花', '水蛭', '延胡索', '黄芪', '苍术', '黄柏', '牛膝']	活血祛瘀、消栓通脉	['祛痰', '理血', '温里']
活血潜镇方	['黄芪', '丹参', '川芎', '当归', '地龙', '赤芍', '葛根', '鸡血藤', '牛膝', '茯苓', '何首乌', '半夏', '龙骨', '牡蛎']	益气活血、化痰潜镇	['祛痰', '理血', '理气']
先兆防栓汤	['黄芪', '当归', '川芎', '菊花', '玄参', '豨莶草', '昆布', '海藻']	益气行血、祛痰化瘀	['祛痰', '理血', '理气']
活血益气方	['丹参', '川芎', '桃仁', '红花', '赤芍', '黄芪', '党参', '桂枝', '丝瓜络', '甘草']	活血祛瘀、益气通络	['祛痰', '理血', '理气']
张氏眩晕复方	['黄芪', '人参', '当归', '川芎', '天麻', '赤芍', '丹参', '红花', '菖蒲', '炙远志', '胆南星', '半夏', '陈皮', '葛根', '鸡血藤', '地龙', '炙甘草']	益气活血、化痰通络	['祛痰', '理血', '理气']
葛根通络饮	['葛根', '丹参', '太子参', '夏枯草', '僵蚕']	益气活血、祛瘀生新、化痰通络	['祛痰', '理血', '理气']
梗塞通	['黄芪', '丹参', '川芎', '葛根', '人参', '红花', '三七', '地龙', '穿山甲', '水蛭']	益气活血、祛瘀通络	['祛痰', '理血', '理气']
通络益气汤	['水蛭', '黄芪', '三七', '丹参', '川芎', '甘草']	活血化痰、益气通络	['祛痰', '理血', '理气']
通脑复元汤	['竹茹', '胆南星', '菖蒲', '茯苓', '丹参', '鸡血藤', '川芎', '田三七', '黄芪', '太子参']	活血化瘀、益气化痰	['祛痰', '理血', '理气']
增损人参丸	['人参', '草乌', '牛膝', '乌梢蛇', '当归', '西红花', '川芎', '赤芍', '细辛', '骨碎补', '炙黄芪', '全蝎', '地龙', '冰片']	益气活血、祛瘀通络	['祛痰', '理血', '理气']
理气通瘀汤	['太子参', '乌药', '香附', '姜黄', '红花', '桃仁', '赤芍', '水半夏', '川芎', '草决明', '羚羊角', '刺蒺藜']	行气化瘀通络、理气豁痰	['祛痰', '理血', '理气']
祛风通络汤	['蜈蚣', '全蝎', '水蛭', '丹参', '黄芪', '甘草']	益气活血、祛瘀通络	['祛痰', '理血', '理气']
祛瘀通络汤	['黄芪', '丹参', '川芎', '当归', '三七', '桃仁', '红花', '地龙', '僵蚕', '蜈蚣', '甘草']	益气化痰、活血通络	['祛痰', '理血', '理气']
醒脑通脉散	['血竭', '西红花', '葛根', '三七', '麝香', '牛黄', '珍珠', '白花蛇舌草', '玳瑁', '胆南星', '川芎', '白薇']	活血祛瘀、行气通络	['祛痰', '理血', '理气']
愈瘫灵	['党参', '茯苓', '菖蒲', '白芍', '白术', '甘草', '半夏', '当归', '肉桂', '川芎', '僵蚕', '升麻', '附子', '桑枝']	化痰通络、益气活血	['祛痰', '理血', '理气']
益气活血化痰方	['桃仁', '红花', '黄芪', '当归', '赤芍', '川芎', '地龙', '桂枝', '菖蒲', '水蛭', '三七', '丹参', '半夏', '胆南星']	益气活血、化痰通络	['祛痰', '理血', '理气']
血府逐瘀汤	['黄芪', '地龙', '赤芍', '当归', '熟地黄', '丹参', '生地黄', '桃仁', '川芎', '牛膝', '柴胡', '枳壳', '红花', '桔梗', '水蛭', '甘草']	活血祛瘀、行气止痛	['祛痰', '理血', '理气']
补阳活血通络汤	['黄芪', '丹参', '红花', '赤芍', '当归', '地龙', '川芎', '胆南星', '熟地黄', '柴胡', '陈皮', '炙甘草']	活血通络、理气化痰	['祛痰', '理血', '理气']
水蛭活血方加味	['川芎', '五灵脂', '水蛭', '土鳖虫', '威灵仙', '穿山甲', '蟾皮', '皂角']	活血化瘀、攻毒化痰、软坚消癥	['祛痰', '理血', '理气']
通脉饮	['瓜蒌', '陈皮', '海藻', '当归', '山楂', '赤芍', '川芎', '丹参', '红花', '莪术']	化痰散结、活血化瘀	['祛痰', '理血', '理气']
复元活血汤	['柴胡', '天花粉', '当归', '穿山甲', '桃仁', '红花', '大黄', '甘草']	活血祛瘀、疏肝通络	['祛痰', '理血', '理气']
补血破瘀汤	['当归', '生地黄', '桃仁', '红花', '枳壳', '赤芍', '柴胡', '甘草', '桔梗', '川芎', '牛膝']	活血祛瘀、行气通络	['祛痰', '理血', '理气']
通阳宣痹汤加减	['黄芪', '党参', '当归', '赤芍', '桃仁', '红花', '丹参', '泽兰', '三棱', '牛膝', '地龙', '莪术']	通阳祛瘀止痛	['祛痰', '理血', '理气']
消肿破瘀胶囊	['地龙', '水蛭', '土鳖虫', '大黄', '木瓜', '牛膝', '当归', '猪苓', '泽泻', '益母草', '泽兰', '车前子', '牡丹皮', '赤芍', '白茅根', '冬瓜皮', '大腹皮']	活血消肿、破疲散结	['祛痰', '理血', '理气']
宋强中药熏洗方	['透骨草', '刘寄奴', '苏木', '红花', '艾叶', '花椒', '干姜']	软坚散结、活血消肿	['祛痰', '理血', '理气']
丹参饮	['丹参', '檀香', '砂仁']	活血祛瘀、行气止痛	['祛痰', '理血', '理气']
失笑散	['五灵脂', '蒲黄']	活血祛瘀、散结止痛	['祛痰', '理血', '理气']
隔下逐瘀汤	['五灵脂', '当归', '川芎', '桃仁', '牡丹皮', '赤芍', '乌药', '延胡索', '甘草', '香附', '红花', '枳壳']	活血祛瘀、行气止痛	['祛痰', '理血', '理气']
桃红四物汤合五苓散	['当归', '赤芍', '川芎', '丹参', '益母草', '红花', '凌霄花', '路路通', '桃仁', '桂枝', '附子', '茯苓', '泽泻', '车前子']	活血祛瘀、化气行水	['祛痰', '理血', '理气']
桃红四物汤加减	['木香', '枳壳']	活血化瘀、理气散结	['祛痰', '理血', '理气']
桃红四物汤合五苓散	['当归', '赤芍', '川芎', '益母草', '凌霄花', '路路通', '桃仁', '泽泻', '车前子', '红花', '桂枝', '附子', '丹参', '茯苓']	活血祛瘀、化气行水	['祛痰', '理血', '理气']
身痛逐瘀汤	['秦艽', '川芎', '桃仁', '红花', '甘草', '羌活', '没药', '当归', '五灵脂', '香附', '牛膝', '地龙']	活血行气、祛瘀通络、通痹止痛	['祛痰', '理血', '理气']
解郁汤	['柴胡', '枳壳', '半夏', '陈皮', '厚朴', '郁金', '远志', '当归', '川芍']	疏肝解郁、化痰活血	['祛痰', '理血', '理气']
膈下逐瘀汤	['五灵脂', '当归', '川芎', '桃仁', '牡丹皮', '赤芍', '乌药', '玄胡索', '甘草', '香附', '红花', '枳壳']	活血祛瘀、行气止痛	['祛痰', '理血', '理气']
通脉化痰汤	['黄芪', '桃仁', '红花', '当归', '川芎', '地龙', '僵蚕', '陈皮', '半夏', '赤芍', '栝楼', '豨莶草']	益气活血、化痰通络	['祛痰', '理血', '理气']
通脉化痰汤	['黄芪', '当归', '地龙', '赤芍', '川芎', '桃仁', '红花', '丹参', '葛根', '半夏', '陈皮', '茯苓', '山楂']	益气活血、化痰通络	['祛痰', '理血', '理气']
软坚化瘀汤	['鳖甲', '生牡蛎', '丹参', '红花', '玄参', '浙贝母', '夏枯草', '菖蒲', '郁金', '天竺黄', '水蛭', '桃仁']	活血化瘀、化痰软坚	['祛痰', '理血', '理气']
骨痹汤	['熟地黄', '当归', '赤芍', '白芍', '丹参', '鸡血藤', '杜仲', '仙灵脾', '独活', '桑寄生', '秦艽', '威灵仙', '五加皮', '牛膝', '穿山甲', '木瓜', '甘草']	疏肝通络、活血祛瘀	['祛痰', '理血', '理气']
复原活血汤	['柴胡', '花粉', '桃仁', '红花', '炮甲', '当归', '大黄', '甘草']	疏肝通络、活血祛瘀	['祛痰', '理血', '理气']
血府逐瘀汤	['当归', '生地黄', '桃仁', '红花', '枳壳', '赤芍', '柴胡', '甘草', '桔梗', '川芎', '牛膝']	活血祛瘀、行气止痛	['祛痰', '理血', '理气']
补阳还五汤加减	['黄芪', '桃仁', '红花', '当归', '地龙', '川芎', '赤芍', '石菖蒲', '远志', '三七']	益气活血、祛瘀通络	['祛痰', '理血', '理气']
半夏白术天麻汤加减	['半夏', '白术', '天麻', '山楂', '茯苓', '泽泻', '葛根', '黄芪', '仙鹤草', '陈皮', '菖蒲', '远志']	理气化痰、活血通络	['祛痰', '理血', '理气']
葛根通络饮	['葛根', '丹参', '太子参', '夏枯草', '僵蚕']	益气活血、祛痰通络	['祛痰', '理血', '理气']
血稠清胶囊	['丹参', '党参', '当归', '陈皮', '三七', '天麻', '地龙', '决明子', '山楂', '黄精', '何首乌', '菟丝子', '半夏', '柴胡']	益气散瘀、理气化痰	['祛痰', '理血', '理气']
刘有泉经验方	['黄芪', '瓜蒌', '山楂', '黄精', '泽泻', '茵陈', '丹参', '半夏', '郁金', '人参', '三七']	益气化痰活血	['祛痰', '理血', '理气']
海藻玉壶汤加减	['海藻', '昆布', '丹参', '川芎', '红花', '半夏', '陈皮', '茯苓']	化痰软坚、活血祛瘀	['祛痰', '理血', '理气']
降脂黏汤四号	['当归', '川芎', '赤芍', '丹参', '牛膝', '益母草', '香附', '郁金', '茵陈', '红花', '生地黄', '金银花', '泽泻']	活血祛瘀、疏肝理气	['祛痰', '理血', '理气']
清脂五味汤	['黄芪', '山楂', '泽泻', '红花', '桃仁']	行气活血、祛瘀逐湿	['祛痰', '理血', '理气']
益气化痰活血方	['太子参', '黄芪', '白术', '茯苓', '半夏', '当归', '桃仁', '红花', '泽泻', '山楂', '决明子', '荷叶']	益气活血、化痰通络	['祛痰', '理血', '理气']
益气活血通脑方	['黄芪', '桃仁', '红花', '当归', '川芎', '赤芍', '地龙', '丹参']	益气活血、祛瘀通络	['祛痰', '理血', '理气']
益气活血通脑方	['黄芪', '桃仁', '红花', '当归', '川芎', '赤芍', '地龙', '丹参', '鸡血藤', '水蛭']	益气活血、祛瘀通络	['祛痰', '理血', '理气']
化瘀消癥汤	['赤芍', '当归', '川芎', '丹参', '鸡血藤', '桃仁', '红花', '青黛', '郁金', '香附', '莪术', '三棱', '土鳖虫', '水蛭']	疏肝理气、活血化瘀、软坚散结	['祛痰', '理血', '理气']
膈下逐淤汤	['五灵脂', '当归', '川芎', '桃仁', '牡丹皮', '赤芍', '延胡索', '甘草', '香附', '红花', '枳壳']	活血祛瘀、行气止痛、	['祛痰', '理血', '理气']
复元活血汤	['瓜蒌', '当归', '红花', '甘草', '穿山甲']	活血祛瘀、疏肝通络	['祛痰', '理血', '理气']
导痰汤	['半夏', '胆南星', '陈皮', '枳实', '茯苓', '桃仁', '红花', '当归', '赤芍', '川芎']	化痰散结、活血祛瘀	['祛痰', '理血', '理气']
	['当归', '生地黄', '桃仁', '红花', '枳壳', '赤芍', '柴胡', '桔梗', '川芎', '牛膝']	活血祛瘀、行气止痛	['祛痰', '理血', '理气']
养阴化痰汤	['天花粉', '枸杞子', '生地黄', '山茱萸', '菖蒲', '炙僵蚕', '广地龙', '葛根', '丹参', '川芎', '鸡血藤']	养阴润燥、化痰活血通络	['祛痰', '理血', '补益', '治燥']
抗呆益智丸	['熟地黄', '山茱萸', '何首乌', '白术', '紫河车', '龟甲', '远志', '菖蒲', '枸杞子', '郁金', '当归', '丹参', '柏子仁']	补肾填精、益髓增智、化痰祛湿、活瘀通络	['祛痰', '理血', '补益', '祛湿']
羚羊角散	['羚羊角', '茯神', '枳壳', '川芎', '附子', '西红花', '防风', '白芷', '半夏', '麝香']	化痰安神、活血通络	['祛痰', '理血', '安神']
消瘀安神丸	['水蛭', '大黄', '熟火黄', '蝉蜕', '土鳖虫', '琥珀', '菖蒲', '远志', '猪牙皂', '红参']	消瘀祛痰、通络安神	['祛痰', '理血', '安神']
三仙地黄饮	['仙鹤草', '仙灵脾', '仙茅', '地黄', '山茱萸', '肉苁蓉', '巴戟天', '附子', '肉桂', '石斛', '麦冬', '五味子', '菖蒲', '远志', '茯苓', '薄荷', '生姜', '大枣']	补虚强壮、安神定志、化痰通络	['祛痰', '理血', '安神']
茯苓泽泻汤	['茯苓', '泽泻', '石决明', '半夏', '丹参', '桂枝', '生姜', '炙甘草']	化痰逐饮、降浊升清	['祛痰', '理气']
涤痰汤加减	['半夏', '胆南星', '陈皮', '枳实', '竹茹', '茯苓', '人参', '菖蒲', '甘草']	化痰止呃	['祛痰', '理气']
降逆止呃汤	['半夏', '厚朴', '藿香', '白术', '沉香', '旋覆花', '柿蒂', '白扁豆', '生姜', '代赭石']	化痰降逆止呃	['祛痰', '理气']
海藻玉壶汤	['海藻', '平贝母', '陈皮', '昆布', '青皮', '川芎', '当归', '连翘', '半夏', '甘草', '独活', '海带']	化痰软坚、理气散结	['祛痰', '理气']
舒肝散结方	['柴胡', '丹参', '赤芍', '当归', '牡蛎', '玄参', '川贝母', '夏枯草', '海藻', '昆布', '海浮石', '牛膝']	舒肝散结	['祛痰', '理气']
贝母瓜蒌散	['平贝母', '瓜蒌', '天花粉', '茯苓', '陈皮', '桔梗']	清肺化痰、降逆平喘	['祛痰', '理气']
瓜蒌薤白半夏汤	['瓜蒌实', '薤白', '白酒']	通阳散结、行气祛痰	['祛痰', '理气']
瓜蒌薤白半夏汤	['栝楼', '薤白', '半夏', '白酒']	行气解郁、通阳散结、祛痰宽胸	['祛痰', '理气']
枳实薤白桂枝汤	['枳实', '厚朴', '薤白', '桂枝', '瓜蒌']	通阳散结、祛痰下气	['祛痰', '理气']
桑白皮汤加减	['桑白皮', '半夏', '紫苏子', '杏仁', '川贝母', '栀子', '黄芩', '黄连', '生姜']	清肺降气、化痰止嗽	['祛痰', '理气']
半夏泻心汤	['半夏', '黄芩', '干姜', '人参', '炙甘草', '黄连', '大枣']	寒热平调、消痞散结	['祛痰', '理气']
导痰汤加减	['陈皮', '枳实', '半夏', '胆南星', '茯苓', '紫苏子', '白芥子']	行气豁痰	['祛痰', '理气']
半夏厚朴汤加减	['厚朴', '紫苏', '半夏', '茯苓', '生姜']	行气开郁、化痰散结	['祛痰', '理气']
三子养亲汤合二陈汤	['苏子', '莱菔子', '白芥子', '陈皮', '茯苓', '半夏', '苍术']	祛痰降气平喘、	['祛痰', '理气']
半夏厚朴汤	['半夏', '茯苓', '厚朴', '生姜', '苏叶']	行气开郁、化痰散结	['祛痰', '理气']
癫狂梦醒汤加减	['桃仁', '赤芍', '柴胡', '大腹皮', '陈皮', '青皮', '苏子', '香附', '远志', '菖蒲']	理气化痰、疏肝解郁	['祛痰', '理气']
瓜蒌薤白白酒汤	['瓜蒌实', '薤白']	通阳散结、行气祛痰	['祛痰', '理气']
瓜蒌薤白半夏汤	['栝楼实', '薤白', '半夏', '白酒']	通阳散结、祛痰宽胸	['祛痰', '理气']
半夏厚朴汤	['半夏', '厚朴', '茯苓', '生姜', '苏叶']	行气散结、降逆化痰	['祛痰', '理气']
半夏厚朴汤	['半夏', '厚朴', '茯苓', '生姜', '苏叶']	行气散结、降逆化痰	['祛痰', '理气']
导痰汤	['半夏', '胆南星', '陈皮', '茯苓', '枳实']	行气豁痰	['祛痰', '理气']
海藻玉壶汤	['海藻', '平贝母', '陈皮', '昆布', '青皮', '川芎', '当归', '连翘', '半夏', '甘草', '独活', '海带']	化痰软坚、理气散结	['祛痰', '理气']
化痰理气汤加减	['川贝母', '瓜蒌皮', '枳壳', '陈皮', '茯苓', '白术', '僵蚕', '前胡', '桔梗', '半夏', '胆南星', '甘草']	理气化痰	['祛痰', '理气']
停鼾汤	['半夏', '南星', '陈皮', '苍术', '厚朴', '菖蒲', '川芎', '丹参', '甘草']	行气化痰停鼾	['祛痰', '理气']
化痰消瘀方	['陈皮', '半夏', '竹茹', '枳壳', '厚朴', '苍术', '苦杏仁', '菖蒲', '栝楼', '当归']	行气化痰、祛瘀止鼾	['祛痰', '理气']
息风通脉益脑汤	['黄芪', '人参', '水蛭', '全蝎', '地龙', '三七', '豨莶草', '菖蒲', '郁金', '益智仁']	益气行血、化痰熄风、醒脑开窍	['祛痰', '理气', '治风', '理血', '开窍']
顺咽方	['黄芪', '当归', '川芎', '赤芍', '地龙', '水蛭', '菖蒲', '胆南星', '郁金', '天麻', '半夏', '陈皮', '白术', '茯苓']	益气活血、祛风化痰、通络开窍	['祛痰', '理气', '治风', '理血', '开窍']
化瘀止血汤加减	['水蛭', '三七', '蒲黄', '花蕊石', '郁金', '大黄', '天麻', '菊花', '胆南星', '牛膝', '益母草', '何首乌']	活血止血、平肝熄风、降气化痰、通络开窍	['祛痰', '理气', '治风', '理血', '开窍']
化瘀醒脑止血汤加减	['三七', '天麻', '郁金', '蒲黄', '水蛭', '胆南星', '何首乌', '蒲黄', '牛膝', '益母草']	平肝熄风、活血止血、降气化痰、通络开窍	['祛痰', '理气', '治风', '理血', '开窍']
降通熄风液	['大黄', '黄芩', '三七', '菖蒲']	降逆熄风止血、活血化瘀、豁痰通络开窍	['祛痰', '理气', '治风', '理血', '开窍']
顺咽方	['黄芪', '当归', '川芎', '赤芍', '地龙', '水蛭', '菖蒲', '胆南星', '郁金', '天麻', '半夏', '陈皮', '白术', '茯苓']	益气活血、祛风化痰、通络开窍	['祛痰', '理气', '治风', '理血', '开窍']
培元通经熄风汤	['当归', '黄芪', '生地黄', '赤芍', '白芍', '天竺黄', '全蝎', '竹沥', '天麻', '钩藤', '附子', '桂枝']	滋阴益气、温经活络、熄风豁痰	['祛痰', '理气', '治风', '补益', '理血', '温里']
防瘫丸	['丹参', '当归', '赤芍', '川芎', '桃仁', '黄芪', '何首乌', '泽泻', '石决明', '地龙', '钩藤', '郁金', '菖蒲', '甘草']	行气活血化痰、滋阴熄风清热	['祛痰', '理气', '治风', '补益', '理血', '清热']
八味降压汤	['黄芪', '钩藤', '杜仲', '当归', '何首乌', '赤芍', '川芎', '黄柏']	益气补血、活血祛瘀、平肝降火	['祛痰', '理气', '治风', '补益', '理血', '清热']
益通汤	['天冬', '龟甲', '枸杞子', '金钱白花蛇', '益智仁', '人参', '水蛭', '菖蒲', '黄精', '何首乌', '鳖甲', '黄连', '苏木', '海藻', '天竺黄', '醋']	益气养阴、潜阳息风、活血通脉、化痰开窍	['祛痰', '理气', '治风', '补益', '理血', '开窍', '温里']
清热解毒化痰活血方	['金银花', '夏枯草', '党参', '白术', '甘草', '半夏', '白芥子', '紫背天葵', '姜黄', '陈皮', '白花蛇舌草', '穿山甲', '山慈菇', '土鳖虫', '僵蚕', '水蛭']	清热解毒、软坚散结、活血化痰	['祛痰', '理气', '痈疡', '理血', '清热']
外用冰硝散	['芒硝', '大黄', '冰片']	清热解毒、行气止痛、活血化瘀、消肿软坚	['祛痰', '理气', '痈疡', '理血', '清热']
外用中药熏洗方	['苏木', '乳香', '没药', '冰片', '芒硝', '透骨草', '伸筋草', '大黄', '黄连']	活血化瘀、清热解毒、消肿散结止痛	['祛痰', '理气', '痈疡', '理血', '清热']
仙方活命饮	['平贝母', '防风', '赤芍', '当归', '甘草', '皂角刺', '穿山甲', '天花粉', '乳香', '没药', '金银花', '陈皮']	清热解毒、消肿散结、活血止痛	['祛痰', '理气', '痈疡', '理血', '清热']
化痰通络汤加减	['黄芪', '葛根', '天麻', '玳瑁', '茯苓', '当归', '赤芍', '三七', '菖蒲', '远志', '川牛膝', '升麻', '地龙']	益气豁痰化瘀、解毒醒脑开窍	['祛痰', '理气', '痈疡', '理血', '开窍']
星萎承气汤	['栝楼', '胆南星', '大黄', '芒硝', '羌活']	通腑降浊、化痰泄热解毒	['祛痰', '理气', '泻下', '痈疡', '清热']
肾衰一号汤加减	['黄芪', '当归', '陈皮', '半夏', '大黄', '茯苓', '仙灵脾']	健脾补肾、益气养血、通腑泄浊	['祛痰', '理气', '泻下', '补益', '消食']
附子汤合枳实薤白桂枝汤加减	['党参', '附子', '茯苓', '栝楼', '白芍', '枳实', '薤白', '桂枝', '黄芪', '厚朴', '杏仁', '桔梗']	温经散寒、振奋阳气、祛痰宽胸理气	['祛痰', '理气', '温里']
黄连温胆汤加味	['黄连', '半夏', '茯苓', '大黄', '当归', '竹茹', '陈皮', '桃仁', '红花']	清热化痰降逆、通窍活血化瘀	['祛痰', '理气', '理血', '开窍', '清热']
加味温胆汤	['胆南星', '瓜蒌仁', '陈皮', '半夏', '黄芩', '栀子', '枳实', '茯苓', '杏仁', '菖蒲', '郁金', '全蝎', '地龙']	清热化痰、宣窍行气通络	['祛痰', '理气', '理血', '开窍', '清热']
加味清气化痰汤	['胆南星', '栝楼', '杏仁', '菖蒲', '郁金', '陈皮', '半夏', '枳实', '全蝎', '地龙', '黄芩', '黑山栀', '茯苓']	清热化痰、宣窍行气通络	['祛痰', '理气', '理血', '开窍', '清热']
旋覆代赭汤加减	['旋覆花', '代赭石', '党参', '半夏', '生姜', '甘草', '大枣']	和胃降逆、化痰下气	['祛痰', '理气', '和解']
二陈汤加减	['半夏', '陈皮', '茯苓', '竹茹', '枳实', '郁金', '砂仁', '佩兰', '薏苡仁', '苍术', '佛手']	和胃化痰、理气降逆	['祛痰', '理气', '和解']
槐军温胆汤	['槐花', '大黄', '茯苓', '半夏', '陈皮', '枳实', '升麻', '竹茹', '藿香', '佩兰', '生姜', '大枣']	祛痰和胃、升清降浊	['祛痰', '理气', '和解']
清热开窍汤	['葶苈子', '紫苏子', '茯苓', '当归', '赤芍', '桃仁', '鱼腥草', '石膏', '黄芩', '地骨皮', '炙桑白皮', '甘草', '西洋参', '升麻', '橘络', '桔梗', '远志']	清热化痰、活血通络、益气固脱	['祛痰', '理气', '固涩', '理血', '清热']
龙珠枣茯欢藤汤	['龙齿', '珍珠母', '柏子仁', '酸枣仁', '茯神', '黄芪', '太子参', '合欢皮', '首乌藤', '百合', '川连', '肉桂', '远志', '菖蒲']	健脾益肾、行气活血、化痰祛瘀	['祛痰', '理气', '补益', '理血', '消食']
益气降脂汤	['黄芪', '淫羊藿', '仙灵脾', '地龙', '草决明', '丹参', '当归', '山楂']	健脾益气、扶正祛邪、化痰活血	['祛痰', '理气', '补益', '理血', '消食']
醒脑复苏汤	['人参', '黄芪', '熟地黄', '白芍', '何首乌', '淫羊藿', '丹参', '川芎', '天麻', '菖蒲', '远志']	益气健脾补肾、活血化瘀、祛痰开窍、醒脑复智	['祛痰', '理气', '补益', '理血', '消食', '开窍']
茱戟石菖蒲汤	['山茱萸', '巴戟天', '黄精', '泽兰', '川芎', '蒲黄', '红花', '太子参', '何首乌', '菖蒲', '水蛭']	补肾填精、健脾益气、活血化瘀、开窍化痰	['祛痰', '理气', '补益', '理血', '消食', '开窍']
回春饮	['黄芪', '川芎', '葛根', '麦冬', '何首乌', '锁阳', '菖蒲', '胆南星']	益气活血、育阴助阳、化痰醒脑	['祛痰', '理气', '补益', '理血', '开窍']
化痰通络汤	['半夏', '陈皮', '白术', '天麻', '茯苓', '菖蒲', '郁金', '远志', '当归', '川芎', '鸡血藤', '甘草', '生龙骨', '生牡砺']	疏肝健脾、化痰通络、行气活血、开窍安神	['祛痰', '理气', '安神', '理血', '消食', '开窍']
疏肝活血汤	['柴胡', '香附', '川芎', '丹参', '当归', '郁金', '茯苓', '半夏', '菖蒲', '白芍', '酸枣仁', '甘草']	疏肝解郁、化瘀祛痰、补中安神	['祛痰', '理气', '安神', '补益', '理血']
健心平律丸	['太子参', '黄芪', '麦冬', '竹茹', '半夏', '陈皮', '枳壳', '丹参', '酸枣仁']	活血化瘀、益气化痰、养心安神	['祛痰', '理气', '安神', '补益', '理血']
益智丸	['制首乌', '熟地黄', '丹参', '远志', '菖蒲', '红花', '水蛭', '川楝子', '麝香', '冰片']	养心益肾、祛痰降浊、活血开窍	['祛痰', '理气', '安神', '补益', '理血', '开窍']
玉竹钩藤汤	['丹参', '玉竹', '女贞子', '牡蛎', '钩藤', '竹茹', '白芍', '麦冬', '茯神', '柏子仁', '知母', '远志', '菖蒲', '甘草']	滋阴潜阳、开窍化痰	['祛痰', '开窍', '治风', '补益']
瘦身汤	['枸杞子', '山药', '何首乌', '陈皮', '栝楼', '决明子', '山楂', '车前子', '甘草', '枳壳', '冬瓜子', '辛夷']	祛湿化痰、开窍醒脑	['祛痰', '开窍', '祛湿']
涤痰汤配合苏合香丸鼻饲。	['半夏', '陈皮', '茯苓', '竹茹', '胆南星', '菖蒲', '枳实', '西洋参', '甘草']	燥湿化痰、醒神开窍	['祛痰', '开窍', '祛湿']
醒神汤	['陈皮', '茯苓', '半夏', '甘草', '远志', '石菖蒲', '郁金', '杏仁', '桔梗', '枳实']	燥湿化痰、行气醒神	['祛痰', '开窍', '祛湿', '理气']
加味涤痰汤	['半夏', '胆南星', '陈皮', '茯苓', '甘草', '菖蒲', '桔梗', '枳实', '麻黄', '僵蚕', '白芷', '杏仁']	化湿豁痰、醒神益智	['祛痰', '开窍', '祛湿', '补益']
麻黄附子细辛汤	['麻黄', '附子', '细辛', '炙甘草', '仙鹤草']	祛湿化痰、开窍醒脑、宁神益智	['祛痰', '开窍', '祛湿', '补益']
菖蒲郁金汤	['菖蒲', '广郁金', '黑山栀', '连翘', '灯芯草', '竹叶', '牡丹皮', '竹沥', '木通', '山慈菇', '海蛤壳', '千金子仁', '红大戟', '麝香', '朱砂', '雄黄']	清热化湿、豁痰开窍	['祛痰', '开窍', '清热', '祛湿']
地黄止痉汤	['熟地黄', '巴戟天', '山茱萸', '石斛', '肉苁蓉', '制附', '五味子', '官桂', '茯苓', '麦冬', '菖蒲', '远志']	调补阴阳、化痰通窍	['祛痰', '开窍', '补益']
地黄饮子	['巴戟天', '山茱萸', '石斛', '肉苁蓉', '附子', '五味子', '官桂', '茯苓', '麦冬', '菖蒲', '远志']	滋肾补阳、开窍化痰	['祛痰', '开窍', '补益']
填精通窍汤	['黄芪', '党参', '何首乌', '山药', '牛膝', '菟丝子', '益智仁', '菖蒲', '当归', '赤芍', '川芎', '枳实']	补肝益肾、充脑髓、化痰祛瘀通窍	['祛痰', '开窍', '补益']
地黄解语饮	['熟地黄', '麦冬', '巴戟天', '制附', '菖蒲', '羌活', '全蝎', '僵蚕']	调补阴阳、化痰通窍	['祛痰', '开窍', '补益']
中风回春灵	['熟地黄', '山茱萸', '巴戟天', '肉苁蓉', '石斛', '菖蒲', '郁金', '远志', '茯苓', '五味子', '僵蚕', '全蝎', '胆南星']	滋阴温肾、开窍化痰	['祛痰', '开窍', '补益', '温里']
益智聪明汤	['制首乌', '山茱萸', '巴戟天', '菖蒲', '远志', '茯苓', '川芎', '鸡血藤', '牛膝', '三七', '当归', '麦冬', '五味子', '黄芪']	补肾填髓、活血化瘀、化痰开窍	['祛痰', '开窍', '补益', '理血']
脑呆复原汤	['熟地黄', '山茱萸', '何首乌', '麦冬', '肉苁蓉', '巴戟天', '西洋参', '茯苓', '菖蒲', '远志', '郁金', '川芎', '麝香', '牛黄', '冰片']	补肾填精、化痰活血、开窍醒神	['祛痰', '开窍', '补益', '理血']
加味解语丹	['天麻', '全蝎', '远志', '附子', '胆南星', '羌活', '木香', '紫河车', '川芎', '川牛膝']	养肝补肾、祛痰化瘀、醒脑开窍	['祛痰', '开窍', '补益', '理血']
加味六味地黄汤	['熟地黄', '山茱萸', '山药', '茯苓', '菖蒲', '川芎', '郁金', '牡丹皮', '黄芪', '水蛭']	滋补肝肾、健脑益智、祛痰行血、开窍醒神	['祛痰', '开窍', '补益', '理血']
补元开窍汤	['紫河车', '何首乌', '丹参', '桃仁', '菖蒲', '郁金', '远志', '胆南星']	补肾益智、活血化痰开窍	['祛痰', '开窍', '补益', '理血']
中风解语丹	['熟地黄', '山茱萸', '肉苁蓉', '巴戟天', '附子', '肉桂', '石斛', '麦冬', '五味子', '菖蒲', '远志', '茯苓']	滋阴补肾、开窍醒神、化痰通络	['祛痰', '开窍', '补益', '理血']
六君子汤加味	['党参', '茯苓', '白术', '陈皮', '菖蒲', '半夏', '远志', '僵蚕', '炙甘草']	补脾益气、化痰开窍	['祛痰', '开窍', '补益', '理气']
地黄饮子	['熟地黄', '生地黄', '山茱萸', '石斛', '麦冬', '五味子', '菖蒲', '远志', '茯苓', '肉苁蓉', '肉桂', '附子', '巴戟天', '薄荷', '赤芍', '川芎']	滋肾阴、补肾阳、益气填精益髓、化痰开窍	['祛痰', '开窍', '补益', '理气']
百合固金汤	['生地黄', '熟地黄', '当归', '芍药', '甘草', '百合', '平贝母', '麦冬', '桔梗', '玄参']	养阴润肺、化痰止咳止血	['祛痰', '解表', '补益', '理血']
二陈汤	['半夏', '陈皮']	燥湿化痰、理气和中	['祛痰', '和解', '祛湿', '理气']
二陈汤合三子养亲汤加减	['紫苏子', '白芥子', '莱菔子', '陈皮', '半夏', '茯苓', '甘草']	燥湿化痰、理气和中	['祛痰', '和解', '祛湿', '理气']
二陈汤	['半夏', '陈皮', '茯苓', '甘草']	燥湿化痰、理气和中	['祛痰', '和解', '祛湿', '理气']
心脑喜康颗粒剂	['珍珠母', '石决明', '钩藤', '丹参', '郁金', '葛根']	调摄肝肾、理气和血、平肝潜阳、熄风化痰	['祛痰', '和解', '理气', '治风', '补益']
柴胡三莪汤	['柴胡', '黄芩', '党参', '甘草', '半夏', '大枣', '生姜', '三棱', '莪术']	疏肝和胃、破血祛瘀、补气、止呃逆	['祛痰', '和解', '理气', '补益', '理血']
醒脑益智汤	['人参', '菟丝子', '枸杞子', '山茱萸', '肉苁蓉', '丹参', '桃仁', '川芎', '水蛭', '菖蒲', '远志', '茯苓', '羌活']	补肾填精、祛瘀化痰	['祛痰', '补益']
加减薯蓣丸	['山药', '熟地黄', '白芍', '当归', '远志', '茯苓', '川芎', '何首乌', '党参', '菖蒲', '白术', '杜仲', '枸杞子', '五味子']	补肾益精填髓、祛瘀化痰	['祛痰', '补益']
自拟益气凉血汤	['黄芪', '党参', '当归', '地榆', '槐花', '蒲黄', '阿胶', '海螵蛸', '紫珠', '大黄', '三七']	补气摄血、祛瘀收敛	['祛痰', '补益']
扶正泄浊保肾汤	['黄芪', '党参', '生地黄', '茯苓', '枸杞子', '丹参', '大黄', '陈皮', '苏梗']	扶正泄浊保肾	['祛痰', '补益']
鲍荣琦调脂汤	['何首乌', '黄精', '桑寄生', '决明子', '山楂', '泽泻', '柴胡', '山茱萸', '水蛭', '丹参', '大黄']	补益肝肾、化痰祛瘀	['祛痰', '补益']
张琪调脂汤	['何首乌', '枸杞子', '决明子', '山楂', '泽泻', '柴胡', '郁金', '薏苡仁', '大黄']	补益肝肾、化痰祛瘀	['祛痰', '补益']
自拟新加黄龙麻仁汤	['大黄', '芒硝', '玄参', '生地黄', '麦冬', '麻仁', '人参']	滋阴增液软坚润燥	['祛痰', '补益', '治燥', '理气']
抗衰通脉灵	['川芎', '葛根', '人参', '何首乌', '淫羊藿', '水蛭', '半夏', '瓜蒌', '石决明', '山楂']	温补肾阳、化痰祛瘀	['祛痰', '补益', '温里']
降脂清脑汤	['山楂', '茯苓', '山药', '白术', '苍术', '葛根', '丹参', '赤芍', '何首乌', '菊花', '草决明', '泽泻', '厚朴', '桑叶', '甘草']	温补脾肾、消淤化痰	['祛痰', '补益', '温里']
补肾利水方	['熟地黄', '枸杞子', '制首乌', '益母草', '猪苓', '泽泻', '茯苓', '水蛭', '大黄']	滋养肝肾、祛瘀利水	['祛痰', '补益', '祛湿']
补肾降脂饮	['桂枝', '茯苓', '猪苓', '泽泻', '熟地黄', '牡丹皮', '山药', '山茱萸', '何首乌', '枸杞子', '山楂', '墨旱莲']	补肾降脂	['祛痰', '补益', '祛湿']
补肾降脂丸	['仙灵脾', '何首乌', '枸杞子', '肉苁蓉', '泽泻']	补肾降脂	['祛痰', '补益', '祛湿']
乌术汤	['何首乌', '白术', '大黄', '枸杞子', '女贞子', '焦山楂', '郁金', '海藻']	补脾益肾、燥湿祛痰	['祛痰', '补益', '祛湿']
萆藻调脂汤	['萆薢', '海藻', '昆布', '山楂', '丹参', '枸杞子', '女贞子', '菟丝子', '白术', '香附', '黄精']	滋补肝肾、化痰祛湿	['祛痰', '补益', '祛湿']
清脂汤	['决明子', '泽泻', '槐花', '丹参', '何首乌', '菟丝子', '荷叶', '菖蒲', '菊花']	滋补肝肾、降脂化浊	['祛痰', '补益', '祛湿']
火土两培丹	['人参', '白术', '茯苓', '薏苡仁', '芡实', '熟地黄', '山茱萸', '五味子', '杜仲', '肉桂', '砂仁', '益智仁', '白芥子', '陈皮']	补益脾肾、化湿祛痰	['祛痰', '补益', '祛湿']
黄芪建中汤加减	['黄芪', '党参', '桂枝', '白芍', '陈皮', '炙甘草']	补脾益气、祛湿化痰	['祛痰', '补益', '祛湿', '理气']
活血益肾方	['丹参', '川芎', '桃仁', '红花', '赤芍', '白芍', '玄参', '天冬', '龟甲', '龙骨', '牡蛎', '牛膝', '枸杞子', '何首乌']	滋补肝肾、活血祛瘀	['祛痰', '补益', '理血']
活血通脉汤	['丹参', '桃仁', '红花', '白芍', '赤芍', '泽兰', '泽泻', '牛膝']	活血化瘀、滋肾豁痰	['祛痰', '补益', '理血']
通络汤	['黄芪', '杜仲', '桑寄生', '续断', '天麻', '钩藤', '川芎', '赤芍', '当归', '桃仁', '红花', '地龙', '丹参', '炙远志', '菖蒲', '桑枝']	补肝益肾、益气血、活血祛瘀通络	['祛痰', '补益', '理血']
补脑健萎汤	['天麻', '钩藤', '石决明', '夏枯草', '僵蚕', '牛膝', '全蝎', '地龙', '丹参', '三七', '胆南星', '桃仁', '红花', '赤芍', '鸡血藤', '黄芪', '当归']	补气活血、祛瘀通络	['祛痰', '补益', '理血']
益气活血化痰方	['黄芪', '丹参', '川芎', '红花', '当归', '地龙', '半夏', '菖蒲', '胆南星', '水蛭', '牛膝']	补气活血、化痰通络	['祛痰', '补益', '理血']
化痰活血益气汤	['黄芪', '茯苓', '菖蒲', '僵蚕', '胆南星', '川芎', '赤芍', '地龙', '水蛭', '桃仁', '红花', '全蝎']	补气活血、化痰通络	['祛痰', '补益', '理血']
补阳还五汤	['黄芪', '当归', '赤芍', '地龙', '川芎', '红花', '桃仁']	补气活血、祛瘀通络	['祛痰', '补益', '理血']
加味补血汤	['黄芪', '当归', '龙眼肉', '鹿角胶', '丹参', '乳香', '没药', '甘松']	滋补肝肾、活血祛瘀	['祛痰', '补益', '理血']
加味芍药甘草汤	['白芍', '炙甘草', '全蝎', '蜈蚣', '地龙', '天麻', '丹参', '当归']	滋阴补肾柔肝、搜风祛瘀通络	['祛痰', '补益', '理血']
止麻复原丸	['黄芪', '丹参', '续断', '鸡血藤', '桑枝', '川芎', '当归', '山楂', '木耳', '桑寄生', '红花', '桃仁', '桂枝', '伸筋草', '甘草', '地龙']	补气养血、活血祛瘀、通络止麻	['祛痰', '补益', '理血']
补阳还五汤加味重用蜈蚣方	['黄芪', '当归', '赤芍', '地龙', '桃仁', '红花', '川芎', '牛膝', '桔梗', '柴胡', '甘草', '陈皮', '郁金', '菖蒲', '蜈蚣', '全蝎']	补气、活血化瘀、化痰通络	['祛痰', '补益', '理血']
血府逐瘀汤	['当归', '生地黄', '桃仁', '红花', '枳壳', '赤芍', '柴胡', '甘草', '桔梗', '川芎', '牛膝']	补气活血、祛瘀通络	['祛痰', '补益', '理血']
玉参汤	['玉竹', '玄参', '北沙参', '枸杞子', '黄芪', '杜仲', '桑寄生', '丹参', '葛根', '赤芍', '地龙', '锁阳', '牛膝', '桃仁', '红花', '蜈蚣']	益阴扶正、祛瘀通络	['祛痰', '补益', '理血']
大补元煎合血府逐瘀汤合葶苈大枣泻肺汤加减	['黄芪', '山药', '熟地黄', '杜仲', '当归', '山茱萸', '桔梗', '柴胡', '牛膝', '赤芍', '川芎', '地龙', '红花', '桃仁', '瓜蒌', '半夏', '枳壳', '葶苈子', '大枣', '水蛭', '甘草']	补气活血、化痰通络	['祛痰', '补益', '理血']
补肾利咽饮	['制首乌', '山药', '山茱萸', '麦冬', '石斛', '五味子', '肉苁蓉', '茯苓', '石菖蒲', '郁金', '当归', '川芍', '天麻', '葛根', '全蝎', '益母草', '蝉蜕', '僵蚕', '白芥子']	补肾养阴、活血化痰、通利咽喉	['祛痰', '补益', '理血']
化痰通络汤	['牛膝', '生地黄', '麦冬', '天花粉', '当归', '山药', '白芍', '菊花', '生杜仲', '地龙', '郁金', '天麻', '鸡血藤']	养阴活血、化痰通络	['祛痰', '补益', '理血']
补阳还五汤加味	['黄芪', '当归', '枳壳', '赤芍', '地龙', '川芎', '桃仁', '红花', '白芥子', '水蛭']	补肾填精、活血化瘀通络、涤痰调气	['祛痰', '补益', '理血']
降脂汤	['绞股蓝', '何首乌', '海藻', '黄精', '山楂', '大黄', '三七']	补肾活血化痰	['祛痰', '补益', '理血']
陈晓经验方	['黄精', '虎杖', '山楂', '昆布', '泽泻', '银杏叶', '菖蒲', '当归']	补肝益肾、豁痰化瘀	['祛痰', '补益', '理血']
活血养阴经验方	['桃仁', '当归', '红花', '川芎', '生地黄', '南沙参', '女贞子', '墨旱莲', '赤芍', '龟甲', '鳖甲', '桑椹']	滋补肝肾、活血祛瘀	['祛痰', '补益', '理血']
调补肺肾方	['桑寄生', '杜仲', '桑椹', '首乌藤', '山茱萸', '党参', '菟丝子', '补骨脂', '远志']	补肺益肾、活血化痰	['祛痰', '补益', '理血']
心脉复康胶囊	['灵芝', '猪苓', '山楂', '三七', '草决明']	补益健脾、逐湿化痰、活血通脉	['祛痰', '补益', '理血', '消食', '温里']
中风煎方	['黄芪', '当归', '川芎', '桃仁', '红花', '赤芍', '地龙', '僵蚕', '全蝎', '水蛭', '丹参', '白芥子', '附子', '青皮', '桂枝', '杜仲', '桑寄生', '淫羊藿']	补气活血、温补肝肾、祛瘀通络	['祛痰', '补益', '理血', '温里']
张文军经验方	['黄芪', '党参', '龟甲', '白术', '茯苓', '葛根', '丹参', '山茱萸', '陈皮', '半夏']	益气补肾、活血化痰	['祛痰', '补益', '理血', '理气']
舒络汤	['黄芪', '丹参', '当归', '川芎']	益气养血、舒经通络、排瘀荡滞、祛瘀生新	['祛痰', '补益', '理血', '理气']
加味补中益气汤	['炙甘草', '升麻', '砂仁', '柴胡', '陈皮', '白术', '当归', '苍术', '半夏', '党参', '黄芪']	补中益气、化痰通络	['祛痰', '补益', '理血', '理气']
健脑益智胶囊	['人参', '黄芪', '何首乌', '黄精', '当归', '茯苓', '菖蒲', '川芎', '细辛', '威灵仙', '冰片']	补肾益气、活血祛痰、健脑益智	['祛痰', '补益', '理血', '理气']
健脑汤	['何首乌', '丹参', '茯神', '当归', '菖蒲', '山茱萸', '肉苁蓉', '巴戟天', '远志', '陈皮', '葛根', '红花', '川芎', '半夏', '甘草']	益气养阴、活血祛瘀、化痰通络	['祛痰', '补益', '理血', '理气']
醒神丹	['人参', '鹿茸', '菖蒲', '赤芍', '天麻', '川芎', '何首乌', '锁阳']	益气养阴、活血祛瘀、化痰通络	['祛痰', '补益', '理血', '理气']
益气通络方	['黄芪', '当归', '水蛭', '麦冬', '山楂', '地龙', '菖蒲', '生地黄', '葛根', '丹参', '胆南星', '天竺黄']	益气养阴、化痰通络	['祛痰', '补益', '理血', '理气']
温胆汤加味	['陈皮', '半夏', '茯苓', '枳实', '竹茹', '胆南星', '黄芪', '葛根', '僵蚕', '全蝎', '地龙', '鸡血藤', '大黄']	滋阴益气、豁痰活血	['祛痰', '补益', '理血', '理气']
芪甲饮	['黄芪', '山甲', '熟地黄', '胆南星', '半夏', '茯苓', '全蝎', '白芍', '陈皮', '红花', '桃仁', '桑枝']	益气养阴、祛痰化瘀	['祛痰', '补益', '理血', '理气']
芪蛭活血汤	['黄芪', '水蛭', '丹参', '枸杞子', '麦冬', '山楂', '地龙', '穿山甲', '菖蒲', '苍术', '桑枝', '栝楼', '竹沥']	益气养阴、活血化痰	['祛痰', '补益', '理血', '理气']
益气滋阴活血方	['黄芪', '丹参', '玄参', '当归', '生地黄', '熟地黄', '山药', '益母草', '苍术', '葛根', '木香', '赤芍', '川芎', '天花粉']	益气滋阴、活血祛瘀	['祛痰', '补益', '理血', '理气']
降糖通脉胶囊	['黄芪', '太子参', '生地黄', '熟地黄', '泽泻', '牡丹皮', '当归', '赤芍', '茯苓', '鸡血藤']	益气养阴、补气活血、祛瘀通络	['祛痰', '补益', '理血', '理气']
八珍汤	['当归', '川芎', '白芍', '熟地黄', '人参', '白术', '茯苓', '炙甘草', '香附', '黄精', '茜草', '青皮', '丹参', '桃仁', '红花', '阿胶']	补益气血、活血祛瘀	['祛痰', '补益', '理血', '理气']
熄风通窍汤	['熟地黄', '制首乌', '山药', '白芍', '当归', '川芎', '丹参', '石决明', '桑叶', '菊花', '茯苓', '半夏', '胆南星']	滋养肝肾、和营柔肝、活血化痰	['祛痰', '补益', '理血', '和解']
痴呆汤	['丹参', '当归', '川芎', '牛膝', '何首乌', '白术', '桃仁', '菖蒲', '红花', '土鳖虫', '地龙', '酸枣仁', '五加皮', '绞股蓝', '益智仁', '枸杞子', '甘草']	补益肝肾、化痰活血、安神益智	['祛痰', '补益', '理血', '安神']
补阳还五汤加减	['炙黄芪', '当归', '牡丹皮', '丹参', '川芎', '僵蚕', '党参', '西洋参', '猪苓', '茯苓', '地龙', '菖蒲', '首乌藤', '柏子仁', '酸枣仁', '炙甘草']	补气活血、化痰通络、宁心祛疲	['祛痰', '补益', '理血', '安神']
益脑化瘤汤	['生地黄', '麦冬', '枸杞子', '山茱萸', '当归', '黄芪', '女贞子', '牡蛎', '龙骨', '半夏', '代赭石', '菊花', '龟甲', '白术', '何首乌', '龙胆草', '全蝎']	滋阴补肾益肝、养脑填髓、化痰散结	['祛痰', '补益', '理气']
高枕无忧散	['人参', '软石膏', '陈皮', '半夏', '茯苓', '枳实', '竹茹', '麦门冬', '龙眼肉', '甘草', '酸枣仁']	养心安神、理气化痰	['祛痰', '补益', '理气', '安神']
石氏颅脑方	['柴胡', '细辛', '薄荷', '当归', '丹参', '川芎', '半夏', '菖蒲', '黄连']	调气机、化瘀热、祛痰安神	['祛痰', '安神']
扶正涤痰化瘀汤	['党参', '黄芪', '熟地黄', '何首乌', '黄精', '丹参', '赤芍', '远志', '菖蒲', '地龙', '僵蚕', '郁金']	健脾益肾、宁心安神、涤痰化瘀、醒脑开窍、熄风解痉、通经活络	['祛痰', '安神', '治风', '补益', '理血', '消食', '开窍']
十味温胆汤	['半夏', '枳实', '陈皮', '茯苓', '酸枣仁', '远志', '五味子', '熟地黄', '人参', '粉草', '生姜', '大枣']	益气养血、化痰宁心	['祛痰', '安神', '补益', '理气']
苓甘五味姜辛汤	['茯苓', '干姜', '五味子', '细辛', '甘草']	温肺化饮	['祛湿']
乳糜尿方	['石苇', '萹蓄', '萆薢', '刘寄奴', '鸡血藤', '茯苓', '生地黄']	利湿通淋	['祛湿']
柴芩汤	['柴胡', '黄芩', '车前草', '石苇', '滑石', '甘草']	解表和里、利水渗湿	['祛湿']
牛黄清热散	['生石膏', '知母', '生地黄', '玄参', '牡丹皮', '金银花', '连翘', '莲子心', '大青叶', '砂仁', '杏仁', '荷叶', '滑石', '甘草']	清气凉营、化湿	['祛湿']
托里消毒散	['党参', '当归', '白术', '白芍', '白芷', '银花', '黄芪', '茯苓', '桔梗', '浙贝母', '甘草']	托毒利湿	['祛湿']
薏苡仁汤	['薏苡仁', '当归', '赤芍', '麻黄', '官桂', '苍术', '甘草', '生姜']	祛湿除痹	['祛湿']
滋脾通淋汤	['太子参', '石斛', '怀山药', '芡实', '薏苡仁', '茯苓', '车前子', '杏仁', '泽泻', '通草']	滋脾通淋	['祛湿']
四苓汤	['泽泻', '白术', '茯苓', '猪苓']	利水除湿	['祛湿']
醒脾化湿汤治疗	['白术', '茯苓', '白豆蔻', '菖蒲']	醒脾化湿	['祛湿']
小续命汤	['麻黄', '防己', '人参', '黄芩', '肉桂', '甘草', '芍药', '川芎', '杏仁', '附子', '防风', '生姜']	活血祛瘀、祛风除湿、通痹止痛	['祛湿', '治风', '祛痰', '理血']
身痛逐瘀汤	['秦艽', '川芎', '桃仁', '红花', '甘草', '羌活', '没药', '当归', '五灵脂', '香附', '牛膝', '地龙']	活血祛瘀、祛风除湿、通痹止痛	['祛湿', '治风', '祛痰', '理血']
真武汤	['茯苓', '芍药', '白术', '附子', '生姜']	温阳利水	['祛湿', '温里']
真武汤	['茯苓', '芍药', '白术', '生姜', '附子']	温阳利水	['祛湿', '温里']
苓桂术甘汤	['茯苓', '桂枝', '白术', '甘草']	温阳化饮	['祛湿', '温里']
生脉散	['人参', '麦冬', '五味子']	温阳化饮	['祛湿', '温里']
小青龙汤	['麻黄', '芍药', '细辛', '干姜', '炙甘草', '桂枝', '半夏', '五味子']	解表散寒、温肺化饮	['祛湿', '温里']
葶苈大枣泻肺汤	['葶苈子', '大枣', '制附', '桂枝', '茯苓', '白术', '白茅根', '泽泻', '桑白皮', '生姜']	泻肺行水、温阳化饮	['祛湿', '温里']
乌头汤	['麻黄', '芍药', '黄芪', '甘草', '川乌']	温经散寒、除湿宣痹	['祛湿', '温里']
加味二妙散	['黄柏', '苍术', '牛膝', '当归', '泽兰叶', '薏苡仁', '乳香', '没药']	温经散寒、除湿宣痹	['祛湿', '温里']
麻黄附子细辛汤合真武汤	['麻黄', '附子', '细辛', '白术', '白芍', '生姜', '茯苓', '沉香', '半夏', '炙甘草', '厚朴', '苦杏仁', '五味子']	温阳化饮	['祛湿', '温里']
清热利湿解毒汤	['金银花', '紫花地丁', '蒲公英', '白花蛇舌草', '茯苓', '土贝母', '羌活', '赤芍', '苍术', '黄柏', '薏苡仁']	清热解毒、利湿通络、祛风除浊、活血化痰	['祛湿', '祛痰', '治风', '痈疡', '理血', '清热']
镇眩汤	['桂枝', '白术', '生地黄', '炙甘草', '川芎', '茯苓', '当归', '白芍', '龙骨', '牡蛎']	健脾除湿、化痰活血、镇痉熄风	['祛湿', '祛痰', '治风', '理血', '消食']
加味泽泻汤	['泽泻', '白术', '山楂', '丹参', '草决明', '茯苓', '黄芪', '何首乌', '茵陈', '决明子']	补肾健脾祛瘀、润肠通便、降脂化湿	['祛湿', '祛痰', '泻下', '补益', '消食']
活血豁痰方	['丹参', '川芎', '桃仁', '红花', '赤芍', '半夏', '天南星', '茯苓', '白术', '枳壳', '陈皮', '僵蚕']	活血祛瘀、豁痰祛湿	['祛湿', '祛痰', '理血']
丁书文经验方	['丹参', '川牛膝', '益母草', '泽兰', '泽泻', '白术', '车前子', '汉防己', '豨莶草']	活血祛瘀、化痰利湿、	['祛湿', '祛痰', '理血']
活血化痰降脂汤	['水蛭', '川芎', '瓜蒌', '半夏', '茯苓', '泽泻', '茵陈', '香附', '山楂']	活血化痰降脂	['祛湿', '祛痰', '理血']
莪黄降脂汤	['莪术', '大黄', '姜黄', '山楂', '黄精', '天竺黄', '川贝母', '菖蒲', '柴胡', '茵陈', '丹参', '泽泻']	活血通络、祛痰化浊	['祛湿', '祛痰', '理血']
十妙消栓汤	['丹参', '当归', '红花', '水蛭', '玄参', '黄芪', '延胡索', '苍术', '黄柏', '牛膝']	活血祛瘀、消栓通脉、利湿消肿	['祛湿', '祛痰', '理血', '温里']
降脂排毒汤	['水蛭', '川芎', '茯苓', '瓜蒌', '半夏', '泽泻', '山楂', '香附']	活血化痰、降脂通脉	['祛湿', '祛痰', '理血', '温里']
软坚降脂方	['桃仁', '红花', '赤芍', '三棱', '莪术', '丹参', '山楂', '陈皮', '猪苓', '甘草', '黄芪', '胆南星', '天竺黄', '水蛭', '麦芽', '焦山楂', '神曲', '泽泻', '白芥子', '当归', '川芎', '桂枝', '生地黄', '牛膝']	化瘀软坚、祛痰降脂	['祛湿', '祛痰', '理血', '理气']
柴陈泽泻汤	['柴胡', '黄芩', '半夏', '党参', '甘草', '大枣', '生姜', '白术', '陈皮', '茯苓', '泽泻', '天麻', '钩藤', '菊花']	健脾益气、利水化痰、熄风定眩	['祛湿', '祛痰', '理气', '治风', '消食']
加味四逆散	['柴胡', '白芍', '枳实', '苍术', '白术', '瓜蒌', '薤白', '水蛭', '川芎', '甘草']	疏肝健脾、化痰活血、降脂	['祛湿', '祛痰', '理气', '理血', '消食']
六君子汤加减	['党参', '茯苓', '白术', '炙甘草', '半夏', '陈皮', '黄芪', '菖蒲', '当归', '升麻']	益气健脾、燥湿化痰活血	['祛湿', '祛痰', '理气', '理血', '消食']
自拟消麻汤	['黄芪', '红花', '桂枝', '川芎', '乌梢蛇', '土鳖虫', '全蝎', '菖蒲', '郁金', '胆南星', '远志', '磁石', '白术', '半夏', '防风', '葛根', '天麻']	益气补阳、健脾燥湿、通脉活血、涤痰逐瘀	['祛湿', '祛痰', '理气', '理血', '消食', '温里']
小半夏汤合苓桂术甘汤加减	['半夏', '生姜', '茯苓', '桂枝', '白术', '炙甘草', '桔梗']	化痰散饮、和胃降逆温阳化饮、健脾利湿	['祛湿', '祛痰', '理气', '和解', '消食', '温里']
消脂降浊散	['山楂', '荷叶', '泽泻', '三七', '大黄']	健脾化湿、行气化痰、活血散瘀、补益肝肾	['祛湿', '祛痰', '理气', '补益', '理血', '消食']
身痛逐瘀汤加减	['秦艽', '当归', '地龙', '川芎', '桃仁', '红花', '牛膝', '羌活', '五灵脂', '没药', '甘草', '香附']	活血祛瘀、滋补肝肾、祛湿散结清热	['祛湿', '祛痰', '理气', '补益', '理血', '清热']
护首汤	['川芎', '当归', '磁石', '桃仁', '郁李仁', '白芷', '天花粉', '红花']	活血祛瘀、利水消肿、镇肝安神	['祛湿', '祛痰', '安神', '治风', '理血']
活血祛瘀方	['当归', '赤芍', '桃仁', '红花', '赤芍', '丹参', '三七', '乳香', '木通', '钩藤', '大黄']	活血祛瘀、泄热通便	['祛湿', '清热', '祛痰', '理血']
抵当汤合五苓散加味	['水蛭', '虻虫', '大黄', '桃仁', '葛根', '川芎', '丹参', '桂枝', '茯苓', '白术', '泽泻', '猪苓', '牛膝', '益母草', '黄芪']	活血化瘀、利水消肿	['祛湿', '理血']
护首汤加味	['水蛭', '地龙', '泽兰', '薏苡仁', '益母草', '当归', '赤芍', '穿山甲', '王不留行', '牛膝', '苦参', '赤小豆', '茵陈', '麻黄']	活血化瘀、发汗利湿	['祛湿', '理血']
活血利水方	['桃仁', '红花', '当归', '川芎', '生地黄', '赤芍', '三棱', '莪术', '葶苈子', '白芥子', '猪苓', '泽泻', '细辛', '大黄', '牛膝']	活血破瘀、利水通络	['祛湿', '理血']
丹红化瘀汤	['丹参', '红花', '秦艽', '羌活', '木瓜', '桃仁', '赤芍', '柴胡', '牛膝', '当归', '川芎', '乳香', '没药']	化瘀除湿、止痛	['祛湿', '理血']
丹红通络汤	['丹参', '红花', '川芎', '秦艽', '独活', '丝瓜络', '鸡血藤', '地龙']	化瘀除湿、通络	['祛湿', '理血']
丹红通经汤	['丹参', '红花', '川芎', '秦艽', '防风', '桑枝', '桂枝', '鸡血藤']	化瘀除湿、通经	['祛湿', '理血']
丹红通经活络汤	['丹参', '红花', '川芎', '泽兰', '益母草', '茯苓', '泽泻', '秦艽', '桑枝', '桂枝', '鸡血藤', '丝瓜络']	化瘀除湿、通经活络	['祛湿', '理血']
丹红除湿汤	['丹参', '红花', '秦艽', '羌活', '川芎', '泽兰', '益母草', '半夏', '陈皮', '茯苓', '泽泻', '白术', '龙骨', '牡蛎', '乳香', '没药']	活血祛湿、止痛	['祛湿', '理血']
韩颐经验方	['丹参', '当归', '赤芍', '牛膝', '鸡血藤', '茯苓', '大腹皮', '薏苡仁', '黄芪']	活血化瘀、利湿通络	['祛湿', '理血']
活血化瘀利湿汤	['丹参', '赤芍', '当归', '鸡血藤', '红花', '泽兰', '牛膝', '川芎', '泽泻', '黄柏', '苍术', '薏苡仁', '甘草']	活血化瘀利湿	['祛湿', '理血']
御痹痛消散	['桂枝', '川乌', '草乌', '牛膝', '丹参', '红花', '鸡血藤', '透骨草', '花椒', '土鳖虫', '赤芍', '白芥子']	活血、利湿、通络	['祛湿', '理血']
燥湿解毒洗药	['白鲜皮', '马齿苋', '苦参', '苍术', '黄柏', '当归', '红花', '牡丹皮']	燥湿止痒活血化瘀	['祛湿', '理血']
小蓟饮子	['生地黄', '小蓟', '滑石', '木通', '蒲黄', '藕节', '淡竹叶', '当归', '黑山栀', '甘草']	凉血止血、利水通淋	['祛湿', '理血']
经验方	['车前草', '木通', '篇蓄', '大黄', '栀子', '滑石', '灯芯草', '瞿麦', '甘草', '紫珠', '墨旱莲', '石橄榄', '石韦', '凤尾草', '藕节']	止血利尿通淋	['祛湿', '理血']
除湿蠲痛汤	['苍术', '羌活', '茯苓', '泽泻', '白术', '陈皮', '甘草']	除湿止痛	['祛湿', '理血']
三七贝母汤	['三七', '川贝母', '白茅根', '藕节']	消癖止血、利水、降脑压	['祛湿', '理血']
小蓟饮子	['小蓟', '生地黄', '茜草', '白茅根', '滑石', '蒲黄炭', '淡竹叶', '当归', '黑山栀', '甘草', '芦根']	凉血止血、利水通淋	['祛湿', '理血']
降浊活血汤	['丹参', '川芎', '茯苓', '山楂', '泽泻', '白术', '决明子', '瓜蒌', '何首乌']	活血化瘀、祛湿化浊	['祛湿', '理血']
化浊行血汤	['荷叶', '焦山楂', '决明子', '水蛭', '赤芍', '大黄', '路路通', '虎杖', '何首乌']	化浊行血	['祛湿', '理血']
冰蛹通脉含片	['葛根', '冰片', '僵蚕']	活血、通脉、化浊	['祛湿', '理血', '温里']
利湿逐瘀汤	['丹参', '当归', '黄芪', '金银花', '牛膝', '赤芍', '玄参', '地龙', '乳香', '没药', '泽兰', '大黄', '连翘', '王不留行', '穿山甲', '水蛭']	利湿逐瘀、活血通脉	['祛湿', '理血', '温里']
化瘀消肿汤	['黄芪', '当归', '川芎', '泽兰', '丹参', '赤芍', '薏苡仁', '猪苓', '黄柏', '土鳖虫', '水蛭', '炙甘草']	活血利湿、通脉止痛	['祛湿', '理血', '温里']
原焕勇经验方	['党参', '黄芪', '当归', '赤芍', '桃仁', '红花', '丹参', '泽兰', '牛膝', '三棱', '地龙', '莪术']	温阳利水、活血化瘀	['祛湿', '理血', '温里']
原焕勇外洗方	['苏木', '当归', '芒硝', '苦参', '红花', '透骨草']	温阳利水、活血化瘀	['祛湿', '理血', '温里']
附子桂枝汤	['桂枝', '生姜', '炙甘草', '大枣', '麻黄', '细辛', '附子']	温经化湿、活络止痛	['祛湿', '理血', '温里']
中风芪红利水饮	['红花', '丹参', '泽兰', '白术', '茯苓', '桑寄生', '益母草', '黄芪', '水蛭', '炙甘草']	益气活血、利水通络	['祛湿', '理血', '理气']
丹红复脏汤	['丹参', '红花', '当归', '秦艽', '防风', '黄芪', '人参', '麦冬', '五味子']	化瘀除湿、益气复脏	['祛湿', '理血', '理气']
益气活血汤	['水蛭', '黄芪', '当归', '赤芍', '白芍', '地龙', '丹参', '桃仁', '红花', '茯苓', '赤小豆', '防己', '甘草']	益气活血、通阳利水	['祛湿', '理血', '理气']
脉痹汤	['黄芪', '当归', '桃仁', '地龙', '川芎', '丹参', '鸡血藤', '茯苓', '猪苓', '车前子', '山楂']	益气活血、渗水利湿	['祛湿', '理血', '理气']
奚氏利湿消肿冲剂	['马鞭草', '薏苡仁', '茯苓', '车前子']	益气利湿消肿	['祛湿', '理血', '理气']
化湿开窍汤	['藿香', '佩兰', '白蔻仁', '车前子', '枇杷叶', '党参', '茯苓', '白术', '黄柏', '知母', '肉桂', '甘草']	益气扶脾、化浊利湿	['祛湿', '理气']
萆薢分清饮	['益智仁', '萆薢', '菖蒲', '乌药']	理气利湿、分清化浊	['祛湿', '理气']
五皮饮合胃苓汤加减	['桑白皮', '陈皮', '大腹皮', '茯苓', '生姜', '苍术', '厚朴', '陈皮', '草果', '桂枝', '白术', '茯苓', '猪苓', '泽泻']	运脾化湿、通阳利水	['祛湿', '理气']
沉香散	['沉香', '陈皮', '当归', '白芍', '石苇', '王不留行', '冬葵子']	疏肝理气、利水通淋	['祛湿', '理气']
减肥丸	['苍术', '陈皮', '香附', '半夏', '泽泻', '茯苓', '山楂', '大腹皮', '车前子', '大黄']	行气利水	['祛湿', '理气']
苓桂术甘汤	['茯苓', '桂枝', '白术', '甘草']	振奋心阳、化气利水	['祛湿', '理气']
真武汤	['附子', '白术', '茯苓', '芍药', '生姜']	振奋心阳、行气利水	['祛湿', '理气']
五苓散	['茯苓', '猪苓', '泽泻', '白术', '桂枝']	利水渗湿、温阳化气	['祛湿', '理气', '温里']
五苓散	['猪苓', '泽泻', '茯苓', '白术', '桂枝']	利水渗湿、温阳化气	['祛湿', '理气', '温里']
五苓散	['猪苓', '泽泻', '白术', '茯苓', '桂枝']	利水渗湿、温阳化气	['祛湿', '理气', '温里']
健神利水一号	['茯苓', '猪苓', '泽泻', '白术', '桂枝', '三七', '丹参']	温阳化气、利水行瘀	['祛湿', '理气', '温里']
轻身一号方	['黄芪', '防己', '白术', '川芎', '制首乌', '泽泻', '山楂', '丹参', '茵陈', '水牛角', '仙灵脾', '大黄']	益气健脾、温肾助阳、活血化瘀、利水消肿	['祛湿', '理气', '补益', '理血', '消食', '温里']
胃苓汤	['苍术', '陈皮', '厚朴', '炙甘草', '泽泻', '猪苓', '茯苓', '白术', '肉桂']	安胃利水止泻、祛湿和胃	['祛湿', '和解']
温胆汤	['半夏', '陈皮', '茯苓', '枳实', '竹茹', '冬枣', '甘草']	清胆和胃、除痰利湿	['祛湿', '和解']
和胃祛瘀方	['黄芪', '苍术', '白术', '茯苓', '枳壳', '半夏', '九香虫', '刺猬皮', '莪术', '莱菔子', '鸡内金', '焦槟榔']	补气行气、化湿和胃、消食除胀	['祛湿', '和解', '理气', '补益', '消食']
益气祛瘀丸	['黄芪', '党参', '丹参', '三七', '赤芍', '川芎', '桃仁', '大黄', '何首乌', '水蛭', '地龙', '蜈蚣', '僵蚕']	破血逐瘀、补气通便	['祛湿', '补益', '理血']
补肾活血利水汤	['大黄', '丹参', '当归', '车前子', '泽兰', '牛膝', '泽泻', '益智仁', '桃仁', '水蛭', '赤芍', '菟丝子', '何首乌']	活血逐瘀、引瘀血下行、补肾填精利水	['祛湿', '补益', '理血']
石海澄经验方	['熟地黄', '山茱萸', '牡丹皮', '山药', '茯苓', '泽泻', '肉桂', '附子', '牛膝', '车前子', '地龙', '丹参', '泽兰', '益母草', '猪苓']	补肾活血、利水降压	['祛湿', '补益', '理血']
调血降脂丸	['制首乌', '女贞子', '丹参', '山楂', '泽泻', '大黄']	补肾活血、祛湿泻浊、	['祛湿', '补益', '理血']
丹参首鸟泽泻饮	['丹参', '何首乌', '泽泻']	活血化瘀、养血益肝、固精益肾、利湿降浊	['祛湿', '补益', '理血', '理气']
温胆汤加减	['党参', '麦冬', '五味子', '桂枝', '云苓', '白术', '竹茹', '陈皮', '半夏', '赤芍', '川芎', '生龙骨', '生牡蛎', '砂仁', '当归', '枳实', '神曲']	益气养阴、化瘀祛湿	['祛湿', '补益', '理血', '理气']
补阳还五涤痰汤	['黄芪', '桃仁', '红花', '当归', '川芎', '地龙', '丹参', '赤芍', '半夏', '陈皮', '竹茹', '菖蒲', '鸡血藤']	补气活血、温通经脉、和中化湿	['祛湿', '补益', '理血', '和解']
泻心汤加味	['大黄', '黄连', '黄芩', '侧柏叶', '生地黄', '石决明', '龙胆草', '墨旱莲']	清胃泻火	['清热']
龙胆泻肝汤	['龙胆草', '黄芩', '栀子', '泽泻', '木通', '当归', '生地黄', '柴胡', '甘草', '车前子']	清泻肝胆实火、清利肝经湿热	['清热']
八正散	['黑山栀', '车前子', '瞿麦', '扁蓄', '滑石', '牡丹皮', '赤芍', '泽泻', '甘草']	清热泻火	['清热']
调胃承气汤	['大黄', '芒硝', '甘草']	通下泄热	['清热']
黄连解毒汤	['黄连', '黄柏', '黄芩', '栀子']	清热泻火	['清热']
龙胆泻肝汤	['龙胆草', '木通', '甘草', '柴胡', '黄芩', '生地黄', '栀子', '车前子', '泽泻', '当归']	清泻肝胆实火、清利肝经湿热	['清热']
滚痰丸	['大黄', '黄芩', '礞石', '焰硝', '沉香']	泻火逐痰	['清热']
滚痰丸	['大黄', '黄芩', '礞石', '焰硝']	泻火逐痰	['清热']
龙胆泻肝汤	['龙胆草', '黄芩', '黑山栀', '泽泻', '木通', '车前子', '当归', '生地黄', '柴胡', '甘草']	清泻肝胆实火、清利肝经湿热	['清热']
含化玉液丸	['寒水石', '石膏', '葛根', '菩蒌根', '乌梅', '麦门冬', '茯苓', '龙脑']	泄热除烦	['清热']
川芎茶调散	['川芎', '荆芥', '白芷', '羌活', '甘草']	疏风清热	['清热', '治风']
羚角钩藤汤	['羚羊角', '钩藤', '桑叶', '菊花', '生地黄', '白芍', '川贝母', '竹茹', '茯神', '甘草']	平肝息风、清热止痉	['清热', '治风']
犀羚白虎汤	['犀角', '羚角', '钩藤', '菊花', '石膏', '知母', '粳米', '甘草']	清热凉气、熄风镇痉	['清热', '治风']
凉营清气汤	['犀角', '生地黄', '赤芍', '牡丹皮', '玄参', '石斛', '栀子', '连翘', '黄连', '石膏', '竹叶', '薄荷', '甘草', '茅根', '芦根', '金汁']	清热凉营、熄风镇痉	['清热', '治风']
银翘败毒汤	['银花', '连翘', '葛根', '牛蒡子', '蝉蜕', '僵蚕', '生石膏', '板蓝根', '马勃']	清热凉卫、熄风镇痉	['清热', '治风']
熄风汤	['天麻', '钩藤', '羚羊角', '黄芩', '全蝎', '栀子', '生地黄', '泽泻', '车前子', '夏枯草', '石决明', '益母草']	平肝潜阳、清热熄风	['清热', '治风']
凉膈散	['大黄', '芒硝', '炙甘草', '连翘', '栀子', '黄芩', '薄荷']	清热利膈、去热熄风	['清热', '治风']
通变风引汤	['生石膏', '龙骨', '牡蛎', '滑石', '龙胆草', '牡丹皮', '大黄', '竹茹', '牛膝', '槟榔', '木香', '白薇', '远志', '菖蒲']	清热熄风、抑阳益阴	['清热', '治风']
羚角钩藤汤	['羚羊角', '钩藤', '菊花', '桑叶', '生地黄', '白芍', '浙贝母', '竹茹', '茯神', '甘草']	平肝熄风、清热止痉	['清热', '治风']
普济消毒饮加减	['黄芩', '黄连', '陈皮', '玄参', '连翘', '板蓝根', '牛蒡子', '薄荷', '僵蚕', '甘草']	清热疏风解热	['清热', '治风']
龙胆泻肝汤加减	['龙胆草', '黄芩', '玄参', '赤芍', '牡丹皮', '车前子', '泽泻', '生地黄', '当归', '柴胡', '甘草']	平肝顺气、降火宣壅	['清热', '治风']
羚羊钩藤汤	['羚羊角', '钩藤', '桑叶', '川贝母', '竹茹', '生地黄', '菊花', '白芍', '茯神木', '甘草']	平肝熄风、清热止痉	['清热', '治风']
地龙散	['地龙', '人参', '天竺黄', '代赭石', '朱砂', '铁粉', '轻粉', '雄黄', '金箔']	清热熄风止痉	['清热', '治风']
石决牡蛎汤	['石决明', '生牡蛎', '白芍', '牛膝', '钩藤', '莲子心', '莲须']	平肝潜阳、清火息风、	['清热', '治风']
前胡散	['前胡', '黄芩', '黑山栀', '防风', '菊花', '南沙参', '甘草', '羚羊角', '麦门冬', '枳壳', '石膏']	清热祛风、	['清热', '治风']
羚角钩藤汤	['羚角', '钩藤', '桑叶', '川贝母', '生地黄', '竹茹', '菊花', '茯神木', '白芍']	平肝潜阳、清火息风	['清热', '治风']
千金排风汤	['犀角', '羚羊角', '紫贝齿', '升麻']	平肝潜阳、清热熄风	['清热', '治风']
犀角消毒饮	['犀角', '银花', '连翘', '甘草', '荆芥', '防风', '牛蒡子']	疏风清热、凉血解毒	['清热', '治风', '痈疡', '理血']
三黄汤	['麻黄', '黄芪', '黄芩', '独活', '细辛']	泻火散寒止痉	['清热', '治风', '温里']
天蛭饮	['制天南星', '水蛭', '川芎', '杜仲', '罗布麻叶', '菖蒲', '全蝎', '地龙', '钩藤', '僵蚕', '夏枯草', '益母草', '黄连', '金银花', '五味子']	平肝熄风潜阳、清热化痰通络	['清热', '治风', '祛痰', '理血']
化瘀祛痰熄风汤	['桃仁', '红花', '丹参', '半夏', '胆南星', '僵蚕', '地龙', '甘草']	活血化瘀、豁痰祛浊、熄风降火	['清热', '治风', '祛痰', '理血']
镇肝涤痰汤	['礞石', '珍珠母', '龙骨', '胆南星', '郁金', '菖蒲', '远志', '天竺黄', '竹沥']	豁痰平肝、解郁清火	['清热', '治风', '祛痰', '理气']
天麻钩藤饮化裁	['天麻', '钩藤', '黄芩', '牛膝', '藁本', '菊花', '僵蚕', '蛇莓', '蒺藜', '珍珠母', '水牛角', '白花蛇舌草', '石决明']	平肝熄风、清热散结	['清热', '治风', '祛痰', '理气']
镇肝益阴汤	['石膏', '石决明', '海蛤壳', '青黛', '龙胆草', '栀子', '天竺黄', '菖蒲', '旋覆花', '代赭石', '知母', '黄柏', '牛膝', '郁金', '竹茹', '滑石', '磁石', '牛黄', '水牛角', '麝香', '珍珠', '朱砂', '雄黄', '黄连', '黄芩', '栀子', '郁金', '冰片', '羚羊角', '水牛角']	镇肝清热、豁痰开窍	['清热', '治风', '祛痰', '开窍']
清泻活血汤	['龙胆草', '黄芩', '栀子', '大黄', '枳实', '钩藤', '珍珠母', '石决明', '丹参', '竹茹', '天竺黄', '菖蒲', '郁金', '麦冬', '石斛']	熄风清火、豁痰开窍	['清热', '治风', '祛痰', '开窍']
解语散	['羌活', '防风']	疏风化痰、清心安神	['清热', '治风', '祛痰', '安神']
资寿解语汤	['附子', '天麻', '防风', '酸枣仁', '羚羊角', '肉桂', '羌活', '甘草', '竹沥', '生姜']	宁心熄风、引火归元、清心化痰	['清热', '治风', '祛痰', '安神']
越婢加术汤	['麻黄', '杏仁', '防风', '浮萍', '白术', '茯苓', '泽泻', '车前子', '石膏', '桑白皮', '黄芩']	疏风泄热、发汗利水	['清热', '治风', '祛湿']
安宫牛黄丸	['牛黄', '郁金', '犀角', '黄芩', '黄连', '黑山栀', '雄黄', '朱砂', '冰片', '麝香', '珍珠']	镇肝熄风、退热清心、芳香开窍	['清热', '治风', '祛湿', '开窍']
羚角钩藤汤	['羚角', '钩藤', '菊花', '桑叶', '生地黄', '白芍', '平贝母', '竹茹', '甘草']	清热凉肝、熄风镇痉	['清热', '治风', '明目']
清肺泻肝汤	['葛根', '黄芩', '藁本', '莱菔子', '桔梗', '升麻', '白芷', '大黄']	清肝息风	['清热', '治风', '明目']
凉血地黄汤	['犀角', '生地黄', '赤芍', '牡丹皮', '玄参', '天冬', '黄芩', '黄连', '黄柏', '知母', '侧柏叶']	清热凉血、熄风镇痉	['清热', '治风', '理血']
平肝潜阳活血汤	['天麻', '代赭石', '石决明', '钩藤', '牛膝', '黄芩', '栀子', '益母草', '川芎', '赤芍', '地龙', '当归', '甘草']	平肝清热、滋阳熄风、活血化瘀	['清热', '治风', '理血']
天麻钩藤饮加减方	['天麻', '栀子', '桑寄生', '杜仲', '牛膝', '黄芩', '茯神', '益母草', '钩藤', '石决明', '首乌藤']	清热凉血、平肝熄风、行血散瘀	['清热', '治风', '理血']
育阴潜阳醒脑汤	['生地黄', '牛膝', '地龙', '钩藤', '益母草', '石决明', '白芍']	清热凉血、平肝熄风	['清热', '治风', '理血']
芎芷石膏汤	['川芎', '白芷', '石膏', '菊花', '羌活', '藁本']	祛风泄热止痛	['清热', '治风', '理血']
清肝宁血方	['生地黄', '苦丁茶', '决明子', '黄芩', '夏枯草', '黄柏', '郁金', '花蕊石', '牛膝', '白茅根', '大黄', '白芍', '钩藤', '龙骨', '牡蛎', '全蝎', '蜈蚣', '三七']	平抑肝阳、止痉熄风、清热凉血、化瘀止血	['清热', '治风', '理血']
镇肝熄风汤	['代赭石', '龙骨', '牡蛎', '玄参', '白芍', '龟甲', '天冬', '川楝子', '麦芽', '茵陈', '甘草', '牛膝']	平肝清热熄风、通经活络	['清热', '治风', '理血']
天麻钩藤饮	['天麻', '钩藤', '川牛膝', '决明子', '黑山栀', '黄芩', '杜仲', '益母草', '桑寄生', '首乌藤', '茯神']	平肝熄风、清热活血	['清热', '治风', '理血']
清肝散偏汤	['珍珠母', '龙胆草', '菊花', '防风', '当归', '白芍', '生地黄', '川芎', '全蝎', '土鳖虫', '地龙', '牛膝']	清肝潜阳、活血通络止痛	['清热', '治风', '理血', '明目']
羚角钩藤汤	['羚羊角', '桑叶', '川贝母', '生地黄', '钩藤', '菊花', '茯神木', '白芍', '甘草', '竹茹']	凉肝熄风、增液舒筋	['清热', '治风', '理血', '明目']
羚角钩藤汤	['羚羊角', '桑叶', '川贝母', '生地黄', '钩藤', '菊花', '茯神', '白芍', '甘草', '竹茹']	凉肝熄风、增液舒筋	['清热', '治风', '理血', '明目']
醒脑活剂	['广角粉', '羚羊角', '牛膝', '珍珠母', '连翘', '牡丹皮', '玄参', '地龙', '生地黄', '蜈蚣', '全蝎', '僵蚕']	息风降火、醒神开窍	['清热', '治风', '开窍']
蔓荆子散	['蔓荆子', '甘菊花', '半夏', '羚羊角', '枳壳', '茯神', '川芎', '黄芩', '防风', '麦门冬', '石膏', '地骨皮', '天麻', '细辛', '炙甘草']	祛风清热缓急、清脑定眩复神	['清热', '治风', '救急']
越婢加术汤加减	['麻黄', '杏仁', '防风', '浮萍', '白术', '茯苓', '泽泻', '车前子', '石膏', '桑白皮', '黄芩']	疏风清热、宣肺行水	['清热', '治风', '解表']
桑菊饮	['杏仁', '连翘', '薄荷', '桑叶', '菊花', '苦梗', '甘草', '苇根']	疏风清热、宣肺止咳	['清热', '治风', '解表']
大秦艽汤	['秦艽', '甘草', '川芎', '当归', '白芍', '细辛', '川羌活', '防风', '黄芩', '石膏', '吴白芷', '白术', '生地黄', '熟地黄', '茯苓', '川独活']	养血荣筋、疏风清热	['清热', '治风', '补益']
眩晕II号方	['钩藤', '菊花', '生地黄', '大黄', '草决明', '夏枯草', '龙胆草', '石决明', '枸杞子', '白芍', '炙甘草']	平肝潜阳、滋阴降火	['清热', '治风', '补益']
平肝清脑降压汤	['天麻', '钩藤', '川芎', '菊花', '柴胡', '葛根', '白芍', '夏枯草', '川楝子', '生牡蛎', '益母草']	平肝泻热、育阴潜阳	['清热', '治风', '补益']
天麻钩藤饮	['天麻', '钩藤', '石决明', '牛膝', '益母草', '栀子', '黄芩', '杜仲', '桑寄生', '茯神', '首乌藤']	平肝熄风、清热活血、补益肝肾	['清热', '治风', '补益', '理血']
天麻钩藤饮	['天麻', '钩藤', '石决明', '栀子', '黄芩', '川芎', '杜仲', '益母草', '桑寄生', '首乌藤', '茯神']	平肝熄风、清热活血、补益肝肾	['清热', '治风', '补益', '理血']
天麻钩藤饮	['天麻', '钩藤', '石决明', '栀子', '黄芩', '牛膝', '杜仲', '益母草', '桑寄生', '首乌藤', '茯神']	平肝熄风、清热活血、补益肝肾	['清热', '治风', '补益', '理血']
天麻钩藤饮	['天麻', '钩藤', '石决明', '黑山栀', '黄芩', '牛膝', '杜仲', '益母草', '桑寄生', '首乌藤', '茯神']	平肝熄风、清热活血、补益肝肾	['清热', '治风', '补益', '理血']
天麻促智冲剂	['天麻', '杜仲', '钩藤', '黄芩', '益母草']	平肝息风、清热活血、补肾益智	['清热', '治风', '补益', '理血']
天麻钩藤饮	['天麻', '川牛膝', '钩藤', '决明子', '黑山栀', '杜仲', '黄芩', '益母草', '桑寄生', '首乌藤', '朱茯神']	平肝熄风、清热活血、补益肝肾	['清热', '治风', '补益', '理血']
天麻钩藤饮	['天麻', '栀子', '黄芩', '杜仲', '益母草', '桑寄生', '首乌藤', '朱茯神']	平肝熄风、清热活血、补益肝肾	['清热', '治风', '补益', '理血']
天麻钩藤饮	['天麻', '钩藤', '决明子', '黑山栀', '黄芩', '川牛膝', '杜仲', '益母草', '桑寄生', '首乌藤', '朱茯神']	平肝熄风、清热活血、补益肝肾	['清热', '治风', '补益', '理血']
大秦艽汤	['秦艽', '甘草', '川芎', '当归', '白芍', '石膏', '川独活', '细辛', '川羌活', '防风', '黄芩', '吴白芷', '白术', '生地黄', '熟地黄', '茯苓']	疏风清热、养血活血	['清热', '治风', '补益', '理血']
天麻钩藤饮	['川牛膝', '钩藤', '黑山栀', '杜仲', '黄芩', '益母草', '桑寄生', '首乌藤', '朱茯神']	平肝熄风、清热活血、补益肝肾	['清热', '治风', '补益', '理血']
天麻促智冲剂	['天麻', '杜仲', '钩藤', '黄芩', '益母草']	平肝熄风、清热活血、补肾益智	['清热', '治风', '补益', '理血']
天麻钩藤饮	['天麻', '川牛膝', '钩藤', '决明子', '黑山栀', '杜仲', '黄芩', '益母草', '桑寄生', '首乌藤', '茯神']	平肝熄风、清热活血、补益肝肾	['清热', '治风', '补益', '理血']
天麻钩藤饮	['天麻', '川牛膝', '钩藤', '决明子', '黑山栀', '杜仲', '黄芩', '益母草', '桑寄生', '首乌藤', '茯神']	平肝熄风、清热活血、补益肝肾	['清热', '治风', '补益', '理血']
天麻钩藤饮	['天麻', '川牛膝', '钩藤', '决明子', '黑山栀', '杜仲', '黄芩', '益母草', '桑寄生', '首乌藤', '朱茯神']	平肝熄风、清热活血、补益肝肾、	['清热', '治风', '补益', '理血']
加味天麻钩藤饮	['天麻', '钩藤', '石决明', '栀子', '黄芩', '牛膝', '杜仲', '首乌藤', '茯神', '桑寄生', '僵蚕', '杜仲', '全蝎', '地龙', '鸡血藤', '甘草']	平肝潜阳、清热熄风、补益肝肾、安神定志	['清热', '治风', '补益', '安神']
天麻钩藤饮	['桑寄生', '首乌藤', '钩藤', '杜仲', '益母草', '牛膝', '茯神', '黑山栀', '黄芩']	平肝熄风、清热安神	['清热', '治风', '安神']
风引汤	['大黄', '干姜', '龙骨', '桂枝', '甘草', '牡蛎', '寒水石', '滑石', '赤石脂', '白石脂', '紫石英', '石膏']	清热熄风、镇惊安神	['清热', '治风', '安神']
黄连解毒汤	['黄连', '黄芩', '黄柏', '栀子']	清热解毒	['清热', '痈疡']
黄连解毒汤	['黄连', '黄芩', '黄柏', '栀子']	泻火解毒	['清热', '痈疡']
五味消毒饮	['金银花', '菊花', '蒲公英', '紫花地丁', '紫背天葵']	清热解毒、消散疔疮	['清热', '痈疡']
席疮门主方	['马勃', '麦麸']	清热解毒	['清热', '痈疡']
烫伤膏	['大黄', '地榆', '麻油', '黄蜡']	清火、解毒、收敛	['清热', '痈疡']
五味消毒饮	['金银花', '野菊花', '蒲公英', '紫花地丁', '紫背天葵']	清热解毒、泻火	['清热', '痈疡']
银翘散	['连翘', '银花', '桔梗', '薄荷', '竹叶', '甘草', '荆芥穗', '淡豆豉', '牛蒡子']	辛凉透表、清热解毒	['清热', '痈疡']
	['青蒿', '柴胡', '荆芥', '白薇', '黄连', '大青叶', '桑叶', '天花粉', '赤芍', '槟榔', '石膏', '山楂', '神曲']	清热解毒、透邪导滞	['清热', '痈疡']
	['冰片', '白矾']	清热解毒、	['清热', '痈疡']
犀角地黄汤、黄连解毒汤、三妙丸合方	['生地黄', '牡丹皮', '赤芍', '黄连', '黄芩', '黑山栀', '黄柏', '防己', '川牛膝', '萆薢', '薏苡仁', '紫花地丁', '甘草']	凉血解毒、清热利湿	['清热', '痈疡', '祛湿', '理血']
化浊解毒通络方	['雷公藤', '青风藤', '大血藤', '金银花', '蒲公英', '黄柏', '茯苓', '白芍', '甘草']	化浊解毒、清热通络	['清热', '痈疡', '祛湿', '理血']
清热化瘀II方	['水牛角', '水蛭', '赤芍', '丹参', '地龙', '川芎', '牛膝', '天竺黄', '大黄', '胆南星', '菖蒲', '牡蛎']	清热解毒、化瘀通络	['清热', '痈疡', '理血']
犀角地黄汤加味	['水牛角', '生地黄', '芍药', '牡丹皮']	清热解毒、凉血散瘀	['清热', '痈疡', '理血']
五味消毒饮加味	['金银花', '连翘', '玄参', '紫花地丁', '丹参', '蒲公英', '七叶一枝花', '紫背天葵', '甘草', '川芎', '葛根']	清热解毒、活血祛栓	['清热', '痈疡', '理血']
加味犀角地黄汤	['水牛角', '大黄', '生地黄', '丹参', '赤芍', '栀子', '菖蒲', '牛膝', '吴茱萸', '泽兰']	清热解毒、凉血止血	['清热', '痈疡', '理血']
八正散合白头翁汤	['瞿麦', '篇蓄', '滑石', '黄柏', '秦皮', '车前子', '白头翁', '连翘', '灯芯草']	清热解毒、凉血止痢	['清热', '痈疡', '理血']
家传褥疮膏	['当归', '红花', '大黄', '紫草', '血竭', '川朴', '乳香', '没药', '金银花', '连翘']	清热解毒、活血生肌	['清热', '痈疡', '理血']
紫草油	['紫草', '麻油']	清热活血生肌	['清热', '痈疡', '理血']
复方红花酒	['红花', '黄芪', '白蔹', '白酒']	活血化瘀、消肿止痛、清热解毒、敛疮生肌	['清热', '痈疡', '理血']
如意金黄散	['姜黄', '大黄', '黄柏', '苍术', '厚朴', '陈皮', '甘草', '天南星', '白芷', '天花粉']	清热解毒、消肿止痛	['清热', '痈疡', '理血']
太乙膏	['玄参', '白芷', '归身', '肉桂', '赤芍', '大黄', '生地黄', '土木鳖', '阿魏', '轻粉', '柳槐枝', '血余炭', '铅丹', '乳香', '没药', '麻油']	消肿清火、解毒生肌	['清热', '痈疡', '理血']
血竭生肌散	['石膏', '轻粉', '赤石脂', '龙骨', '乳香', '樟脑', '铅丹', '麝香']	清热活血、排脓生肌	['清热', '痈疡', '理血']
犀角地黄汤	['犀角', '生地黄', '芍药', '牡丹皮']	清热解毒、凉血散瘀	['清热', '痈疡', '理血']
清营汤	['水牛角', '生地黄', '玄参', '竹叶', '麦冬', '丹参', '黄连', '银花', '连翘']	清热解毒、凉血止血	['清热', '痈疡', '理血']
犀角地黄汤	['犀角', '生地黄', '白芍', '赤芍', '玄参', '牡丹皮', '金银花', '山药', '甘草', '白花蛇舌草']	清热解毒、凉血散瘀	['清热', '痈疡', '理血']
解毒活血汤	['金银花', '玄参', '当归', '石斛', '牛膝', '茜草', '桃仁', '红花', '土鳖虫', '生地黄', '水蛭', '甘草']	清热解毒、活血通脉	['清热', '痈疡', '理血', '温里']
降红汤	['白花蛇舌草', '知母', '半枝莲', '赤芍', '川芎', '虎杖', '漏芦', '丹参', '黄柏', '三棱', '莪术', '青黛', '雄黄']	清热解毒、凉肝活血	['清热', '痈疡', '理血', '明目']
卷柏鳖甲煎	['鳖甲', '甲珠', '蛰虫', '赤芍', '牡丹皮', '红花', '柴胡', '当归', '桂枝', '厚朴', '枳壳', '卷柏', '青黛', '甘草']	疏肝理气、活血化瘀、消癥化积、清热解毒	['清热', '痈疡', '理血', '理气']
五味消毒饮	['金银花', '野菊花', '蒲公英', '紫花地丁', '紫背天葵']	清热解毒、活血和营	['清热', '痈疡', '理血', '和解']
防风通圣散合补中益气汤加减	['防风', '荆芥', '川芎', '薄荷', '当归', '黑豆', '白术', '泽泻', '栀子', '麻黄', '郁金', '甘草', '桔梗', '党参', '陈皮', '柴胡', '黄芪', '白芥子']	解表通里、清热解毒、调补脾胃、益气升阳、	['清热', '痈疡', '理气']
防风通圣散合补中益气汤	['防风', '荆芥', '川芎', '薄荷', '当归', '黑豆', '白术', '泽泻', '栀子', '麻黄', '郁金', '甘草', '桔梗', '党参', '陈皮', '茯苓', '柴胡', '黄芪', '甘草', '白芥子']	解表通里、清热解毒、调补脾胃、益气升阳	['清热', '痈疡', '理气']
清营汤加减	['水牛角', '生地黄', '玄参', '竹叶心', '麦冬', '丹参', '黄连', '银花', '连翘', '桔梗', '牛膝']	清营解毒、清心开窍	['清热', '痈疡', '开窍']
褥疮速愈散	['麝香', '孩儿茶', '玳瑁', '乳香', '赤石脂', '冰片', '青黛']	活血生肌、滋阴清热	['清热', '痈疡', '补益', '理血']
乌梅丸	['乌梅', '附子', '干姜', '桂枝', '川椒', '当归', '人参', '黄连', '黄柏']	温阳散寒、敛阴清热	['清热', '温里']
生葛根汤	['葛根']	清热化痰	['清热', '祛痰']
黄连温胆汤	['半夏', '陈皮', '竹茹', '枳实', '茯苓', '炙甘草', '大枣', '黄连']	清热化痰	['清热', '祛痰']
涤痰散	['芒硝', '大枣', '胆南星', '菖蒲', '天竺黄', '竹沥']	清热化痰定惊	['清热', '祛痰']
葶苈散	['杏仁', '葶苈子', '桑白皮', '栀子', '桔梗', '陈皮', '海蛤壳', '赤茯苓', '荆芥', '薄荷', '人参', '甘草']	清热豁痰、利气开郁	['清热', '祛痰']
程氏萆薢分清饮加减	['灯心草']	清利湿热、分清泄浊	['清热', '祛痰']
导痰汤合檬石滚痰丸加减	['青礞石', '胆南星', '茯苓', '黄芩', '郁金', '枳实', '陈皮', '半夏', '大黄', '沉香', '栀子', '竹茹']	清心化痰	['清热', '祛痰']
黄连温胆汤	['黄连', '半夏', '陈皮', '茯苓', '甘草', '枳实', '竹茹', '大枣']	清热化痰	['清热', '祛痰']
苍琥温胆汤	['菖蒲', '琥珀', '甘松', '黄连', '半夏', '陈皮', '枳实', '竹茹', '茯苓', '泽泻', '牡丹皮', '甘草']	清热化痰	['清热', '祛痰']
礞石滚痰丸	['青礞石', '沉香', '大黄', '黄芩', '栝楼', '半夏', '黄连', '胆南星', '枳实']	涤痰泻火、宣降肺气	['清热', '祛痰']
星蒌承气汤	['栝楼', '胆南星', '菖蒲', '地龙', '丹参', '郁金', '枳壳', '厚朴', '大黄']	清热涤痰、宽胸散结、润燥滑肠	['清热', '祛痰', '治燥', '理气']
羚角钩藤汤加减	['半夏', '胆南星', '竹茹', '川贝母', '黄芩', '羚羊角', '桑叶', '钩藤', '菊花', '生地黄', '白芍', '甘草', '陈皮', '茯苓', '枳实']	清热化痰、平肝息风	['清热', '祛痰', '治风']
黄连解毒汤	['黄连', '黄芩', '黄柏', '栀子']	泄热涤痰熄风	['清热', '祛痰', '治风']
镇肝元阳熄风降逆汤	['代赭石', '胆草', '杏仁', '旋覆花', '杜仲', '木瓜', '枇杷叶', '柏子仁', '秦艽', '菊花', '薄荷', '首乌藤', '大黄', '山楂', '玄参', '生地黄', '牛膝', '麦冬']	清肝降火、润嗓化痰、疏风去邪	['清热', '祛痰', '治风', '明目']
风火煎	['羚羊角', '犀角', '生地黄', '牡丹皮', '全蝎', '菖蒲', '郁金', '大黄']	凉肝熄风、清心化痰	['清热', '祛痰', '治风', '明目']
仿羚羊角散	['羚羊角', '钩藤', '石决明', '天麻', '甘菊花', '白芍', '生地黄', '茯神', '竹沥', '半夏', '胆南星', '当归', '竹茹']	清肝潜阳、化痰熄风	['清热', '祛痰', '治风', '明目']
加减导痰汤	['胆南星', '半夏', '茯苓', '陈皮', '瓜蒌', '枳实', '桔梗', '黄连', '黄芩', '白术', '人参', '当归', '木香', '甘草']	清热化痰、祛风通络	['清热', '祛痰', '治风', '理血']
中风一号方	['石决明', '钩藤', '黄芩', '牡丹皮', '浙贝母', '天麻', '天竺黄', '大黄', '猪苓']	泻火熄风、逐瘀化痰	['清热', '祛痰', '治风', '理血']
清热祛瘀汤	['钩藤', '三七', '大黄', '葛根', '菖蒲']	清热平肝、祛瘀通络	['清热', '祛痰', '治风', '理血']
双柏散	['侧柏叶', '泽兰', '黄柏', '大黄', '薄荷']	活血祛瘀、消肿止痛、清热凉血解毒	['清热', '祛痰', '痈疡', '理血']
脑瘤消方	['金银花', '连翘', '蒲公英', '紫花地丁', '夏枯草', '三棱', '莪术', '半枝莲', '白花蛇舌草', '瓜蒌', '瓦楞子', '礞石', '水蛭', '蜈蚣', '猪苓', '牡蛎']	清热解毒、化痰软坚散结	['清热', '祛痰', '痈疡', '理气']
当归芦荟丸	['当归', '龙胆草', '栀子', '黄连', '黄柏', '黄芩', '芦荟', '大黄', '木香', '麝香', '青黛']	清肝泄火、化痰宁神	['清热', '祛痰', '明目']
清热化痰汤	['熟大黄', '水牛角', '赤芍', '水蛭', '生地黄', '菖蒲', '三七', '地龙']	清热凉血、化痰祛瘀	['清热', '祛痰', '理血']
加味温胆汤	['半夏', '白术', '茯苓', '陈皮', '菖蒲', '广郁金', '牛膝', '胆南星', '僵蚕', '鸡血藤', '炙甘草']	清热化痰、搜风活血	['清热', '祛痰', '理血']
清热化痰通络方	['黄连', '半夏', '陈皮', '茯苓', '枳实', '竹茹', '全蝎', '大黄', '水蛭']	清热化痰、活血通络	['清热', '祛痰', '理血']
郁金二陈汤	['郁金', '陈皮', '半夏', '香附', '丹参', '炙甘草']	清热化痰通络	['清热', '祛痰', '理血']
芩连温胆汤加减	['黄芩', '半夏', '胆南星', '竹茹', '地龙', '黄连', '川贝母', '陈皮', '茯苓', '枳实', '牛膝']	清热化痰、搜风通络	['清热', '祛痰', '理血']
活血除热汤	['柴胡', '菖蒲', '黄连', '薄荷', '川芎', '丹参', '陈皮', '当归', '泽兰', '土鳖虫', '半夏', '蔓荆子', '黄连', '水牛角']	清热化痰通络	['清热', '祛痰', '理血']
生大黄联合云南白药	['大黄', '云南白药']	清热泻下祛瘀、止血愈伤、活血散瘀、消炎散肿	['清热', '祛痰', '理血']
二黄乌及汤	['大黄', '黄芩', '三七', '白及', '海螵蛸']	清热祛瘀止血	['清热', '祛痰', '理血']
石菖蒲化痰汤	['菖蒲', '远志', '桔梗', '僵蚕', '生姜', '竹茹', '蜈蚣', '全蝎', '苏木', '平贝母']	清热化痰、活血通络	['清热', '祛痰', '理血']
陶氏经验一方	['陈皮', '半夏', '茯苓', '竹茹', '枳实', '黄连', '栝楼', '钩藤', '大黄', '丹参']	清热化痰、活血通络	['清热', '祛痰', '理血']
胆星竹茹饮	['胆南星', '陈皮', '半夏', '茯苓', '枳实', '竹茹', '僵蚕', '菖蒲', '黄芪', '丹参']	清热化痰、活血通络	['清热', '祛痰', '理血']
水蛭山楂汤	['水蛙', '山楂', '郁金', '丹参', '茶叶', '泽泻', '草决明']	活血祛瘀、清肝泄火、祛除痰湿、	['清热', '祛痰', '理血', '明目']
芪连温胆汤	['黄芪', '黄连', '半夏', '茯苓', '陈皮', '枳实', '胆南星', '竹茹', '郁金', '厚朴', '菖蒲']	清热化痰、益气通络	['清热', '祛痰', '理血', '理气']
清上瘀血汤	['羌活', '川芎', '独活', '红花', '甘草', '连翘', '枳壳', '桔梗', '赤芍', '栀子仁', '黄芩', '桃仁', '生地黄', '苏木', '当归', '大黄']	清热散结、活血化瘀	['清热', '祛痰', '理血', '理气']
黄晋红经验方	['黄芩', '桑白皮', '郁金', '杏仁', '忍冬藤', '瓜蒌', '丹参', '三七']	肃肺降气、泻热化痰、活血化瘀	['清热', '祛痰', '理血', '理气']
转舌膏	['黑山栀', '薄荷', '淡竹叶', '黄芩', '桔梗', '甘草', '菖蒲', '远志']	清热化痰、理气利咽	['清热', '祛痰', '理气']
赵东奇经验方	['菖蒲', '茯苓', '白芍', '青皮', '郁金', '香附', '栀子', '半夏', '胆南星', '陈皮', '海浮石', '川贝母', '木香', '酸枣仁', '灯芯草', '朱砂']	清火化痰、疏肝理气	['清热', '祛痰', '理气']
桃核承气汤	['大黄', '桂枝', '当归', '赤芍', '桃仁', '枳壳', '益母草', '石苇', '甘草']	祛瘀行气、清利湿热	['清热', '祛痰', '理气']
桑白皮汤	['桑白皮', '半夏', '苏子', '杏仁', '平贝母', '黄芩', '黄连', '白果']	清火涤痰降气定喘	['清热', '祛痰', '理气']
葶苈大枣泻肺汤	['葶苈子', '胆南星', '天竺黄', '白果', '栝楼', '地龙', '大黄', '厚朴', '黄芩', '生石膏', '金银花']	清火涤痰降气定喘	['清热', '祛痰', '理气']
清热化痰汤	['茯苓', '陈皮', '半夏', '菖蒲', '枳实', '木香', '黄芩', '黄连', '板蓝根', '桔梗', '苏子', '瓜蒌', '杏仁']	清热化痰、理气疏肝	['清热', '祛痰', '理气']
小陷胸汤	['半夏', '黄连', '栝楼实']	清热化痰、宽胸散结	['清热', '祛痰', '理气']
小陷胸汤	['黄连', '半夏', '瓜蒌']	清热化痰、宽胸散结	['清热', '祛痰', '理气']
柴胡龙牡复律汤	['柴胡', '黄芪', '半夏', '党参', '龙齿', '生牡蛎', '丹参', '枣仁', '麦冬', '五味子', '常山', '炙甘草']	清热化痰、解郁定悸	['清热', '祛痰', '理气']
生铁落饮	['天冬', '麦冬', '平贝母', '胆南星', '陈皮', '远志', '菖蒲', '连翘', '茯苓', '茯神', '玄参', '钩藤', '丹参', '朱砂']	镇心安神、清热化痰	['清热', '祛痰', '安神']
加味二妙散加减	['苍术', '黄柏', '萆薢', '防己', '薏苡仁', '蚕沙', '木瓜', '牛膝', '龟甲']	清热利湿、通利经脉	['清热', '祛湿']
龙胆泻肝汤合八正散	['柴胡', '黑山栀', '黄芩', '车前子', '滑石', '扁蓄', '瞿麦', '木通', '大黄', '甘草']	清热利湿通淋	['清热', '祛湿']
银白导赤汤	['银花', '白花蛇舌草', '生地黄', '木通', '淡竹叶', '车前子', '黄柏', '泽泻', '瞿麦', '甘草']	清热泻火、利水通淋	['清热', '祛湿']
柴芩八正散加减	['柴胡', '黄芩', '瞿麦', '萹蓄', '木通', '大黄', '黑山栀', '灯心草', '车前子', '滑石', '甘草']	清热利湿通淋	['清热', '祛湿']
蒲连汤组成	['蒲公英', '滑石', '半枝莲', '木通', '白扁豆', '白术', '茯苓', '篇蓄', '瞿麦', '生地黄', '黄连', '苦参']	清热利湿、利水通淋	['清热', '祛湿']
清热通淋汤	['滑石', '萹蓄', '瞿麦', '石韦', '栀子', '黄柏', '生地黄', '淡竹叶', '炙甘草']	清热泻火、利湿通淋	['清热', '祛湿']
八正散	['瞿麦', '萹蓄', '牡丹皮', '赤芍', '泽泻']	清热泻火、利水通淋	['清热', '祛湿']
地榆大黄汤	['大黄', '白茅根', '萆薢', '瞿麦', '牡丹皮', '黄柏', '石苇', '木槿花']	清热利湿通淋	['清热', '祛湿']
分清五淋丸	['木通', '车前子', '黄芩', '茯苓', '猪苓', '黄柏', '大黄', '萹蓄', '瞿麦', '知母', '泽泻', '栀子', '甘草', '滑石']	清热泻火、利尿通淋	['清热', '祛湿']
小柴胡汤加减	['柴胡', '黄芩', '半夏', '栀子', '车前草', '滑石', '通草', '炙甘草']	和解清热、利湿通淋	['清热', '祛湿']
三仁汤加减	['杏仁', '薏苡仁', '白豆蔻', '厚朴', '半夏', '通草', '滑石', '竹叶', '黄芩', '紫花地丁', '金银花', '车前草']	化湿清热	['清热', '祛湿']
龙胆泻肝汤加减	['龙胆草', '黄芩', '栀子', '泽泻', '通草', '车前子', '当归', '生地黄', '柴胡', '甘草', '黄柏', '川牛膝', '大黄']	泻肝清热利湿	['清热', '祛湿']
二妙散	['黄柏', '苍术']	清热燥湿	['清热', '祛湿']
三黄洗剂	['大黄', '黄柏', '黄芩', '苦参']	清热燥湿、收涩止痒	['清热', '祛湿']
八正散加减	['石苇', '滑石', '车前子', '扁蓄', '瞿麦', '甘草', '栀子', '通草', '大黄', '黄柏', '枳壳']	清热泻火、利水通淋	['清热', '祛湿']
四妙汤	['苍术', '黄柏', '牛膝', '木瓜', '蚕沙', '薏苡仁', '防己', '茯苓', '陈皮', '丹参', '甘草']	清热除湿	['清热', '祛湿']
甘露消毒丹加减	['藿香', '薄荷', '白蔻仁', '菖蒲', '黄芩', '木通', '连翘', '大黄', '茵陈', '车前子', '滑石']	清热祛湿、	['清热', '祛湿']
枳实导滞丸	['大黄', '枳实', '神曲', '茯苓', '黄芩', '黄连', '白术', '泽泻']	消导化积、清热利湿	['清热', '祛湿']
防风通圣散	['防风', '川芎', '当归', '芍药', '大黄', '薄荷', '麻黄', '连翘', '芒硝', '石膏', '黄芩', '桔梗', '荆芥穗', '白术', '栀子']	清热利湿	['清热', '祛湿']
当归拈痛汤	['羌活', '甘草', '茵陈', '防风', '苍术', '当归', '知母', '猪苓', '泽泻', '升麻', '白术', '黄芩', '葛根', '人参', '苦参']	利湿清热、疏风止痛	['清热', '祛湿', '治风', '理血']
当归拈痛汤	['羌活', '防风', '升麻', '葛根', '白术', '苍术', '当归', '人参', '甘草', '苦参', '黄芩', '知母', '茵陈', '猪苓', '泽泻']	利湿清热、疏风止痛	['清热', '祛湿', '治风', '理血']
当归拈痛汤	['当归', '羌活', '防风', '猪苓', '泽泻', '黄芩', '葛根', '苍术', '白术', '苦参', '知母', '防己', '蚕沙']	利湿清热、疏风止痛	['清热', '祛湿', '治风', '理血']
泻心汤	['大黄', '黄连', '黄芩']	泻火解毒、燥湿泄热	['清热', '祛湿', '痈疡']
导赤散加味药物	['木通', '竹叶', '甘草', '栀子', '石苇', '扁蓄', '车前子', '猪苓', '黄柏', '滑石', '蒲公英']	清热利湿解毒	['清热', '祛湿', '痈疡']
尿感灵冲剂	['海金沙', '金钱草', '凤尾草', '紫花地丁']	清热解毒通淋	['清热', '祛湿', '痈疡']
肾舒冲剂	['大青叶', '白花蛇舌草', '瞿麦', '扁蓄', '海金沙', '生地黄', '茯苓', '甘草']	清热解毒、利湿通淋	['清热', '祛湿', '痈疡']
杨毅经验方	['萆薢', '乌药', '茯苓', '车前子', '篇蓄', '益智仁', '滑石', '甘草']	清热解毒、利湿通淋	['清热', '祛湿', '痈疡']
甘露消毒丹	['飞滑石', '黄芩', '茵陈', '菖蒲', '川贝母', '木通', '藿香', '连翘', '白蔻仁', '薄荷', '射干']	利湿化浊、清热解毒	['清热', '祛湿', '痈疡']
热炎宁合剂方	['蒲公英', '虎杖', '败酱草', '半枝莲', '蝉蜕', '羚羊角']	清热解毒、通便泻火、利湿透毒	['清热', '祛湿', '痈疡']
生肌利湿方	['滑石', '冰片', '炉甘石']	清热生肌利湿	['清热', '祛湿', '痈疡']
刘德贵经验方	['卷柏', '地榆', '明矾']	清热生肌利湿	['清热', '祛湿', '痈疡']
三黄冰片粉	['黄连', '黄芩', '黄柏', '冰片']	清热生肌利湿	['清热', '祛湿', '痈疡']
石膏参柏散	['苦参', '黄柏', '五倍子', '大黄']	清热生肌利湿	['清热', '祛湿', '痈疡']
史淑华经验方	['白杨叶']	清热生肌利湿	['清热', '祛湿', '痈疡']
萆薢渗湿汤	['萆薢', '薏苡仁', '黄柏', '茯苓', '牡丹皮', '泽泻', '滑石', '通草']	清热利湿、敛疮生肌	['清热', '祛湿', '痈疡']
葛根芩连汤	['葛根', '黄连', '甘草', '黄芩']	清热祛湿解毒	['清热', '祛湿', '痈疡']
茵陈赤小豆汤	['茵陈', '赤小豆', '薏苡仁', '泽泻', '苍术', '黄柏', '苦参', '防己', '佩兰', '木通', '白蔻仁', '甘草']	清热解毒、利湿消肿	['清热', '祛湿', '痈疡', '理血']
四妙勇安汤加味	['金银花', '当归', '玄参', '赤芍', '栀子', '苍术', '连翘', '黄芩', '紫草', '甘草']	清热解毒、利湿消肿	['清热', '祛湿', '痈疡', '理血']
复方旱莲汤	['墨旱莲', '山稔根', '刺苋菜', '假蒟', '甘草']	凉血止血、清热解毒、利湿、收敛止血	['清热', '祛湿', '痈疡', '理血']
曾平安经验方	['茯苓', '车前草', '生地黄', '黄柏', '赤芍', '薏苡仁', '金银花', '连翘']	清热利湿、活血生肌	['清热', '祛湿', '痈疡', '理血']
龙石膏	['黄柏', '儿茶', '乳香', '没药', '龙骨', '赤石脂', '血竭', '铅丹']	清热燥湿、活血生肌	['清热', '祛湿', '痈疡', '理血']
清热通络汤加减	['金银花', '蒲公英', '紫花地丁', '茯苓', '车前子', '薏苡仁', '白花蛇舌草', '丹参', '穿山甲']	清热利湿、活血通络	['清热', '祛湿', '理血']
八妙通脉汤	['金银花', '当归', '玄参', '苍术', '黄柏', '薏苡仁', '牛膝', '甘草']	清热利湿、凉血化瘀	['清热', '祛湿', '理血']
当归导滞汤	['大黄', '当归']	活血化瘀、泄热通便	['清热', '祛湿', '理血']
消栓通脉汤	['茵陈', '金银花', '赤小豆', '桃仁', '黄柏', '红花', '赤芍', '栀子', '水蛭', '苍术']	清热利湿化瘀	['清热', '祛湿', '理血']
消栓通脉汤	['茵陈', '赤小豆', '栀子', '赤芍', '黄柏', '苍术', '牛膝', '金银花', '桃仁', '红花', '水蛭']	清热利湿、活血化瘀	['清热', '祛湿', '理血']
四妙散	['苍术', '黄柏', '牛膝', '薏苡仁']	清热利湿、化瘀舒筋	['清热', '祛湿', '理血']
四妙勇安汤	['忍冬藤', '玄参', '当归', '甘草']	清热利湿、活血止痛	['清热', '祛湿', '理血']
原焕勇经验方	['当归', '忍冬藤', '金银花', '赤芍', '泽兰', '牛膝', '牡丹皮', '防己', '萆薢', '赤小豆', '丝瓜络', '泽泻', '车前子', '茯苓']	清热利湿、活血通络、	['清热', '祛湿', '理血']
原焕勇外洗方	['红花', '金银花', '蒲公英', '芒硝', '当归']	清热利湿、活血通络	['清热', '祛湿', '理血']
清利通络汤加味	['金银花', '蒲公英', '紫花地丁', '丹参', '鸡血藤', '白花蛇舌草', '薏苡仁', '车前子', '穿山甲', '茯苓']	清热利湿、活血化瘀	['清热', '祛湿', '理血']
消肿破瘀汤	['赤芍', '牡丹皮', '当归', '泽兰', '益母草', '泽泻', '车前子', '白茅根', '大腹皮', '木瓜', '猪苓', '大黄', '地龙', '水蛭', '土鳖虫', '牛膝']	活血通络、清热利湿	['清热', '祛湿', '理血']
麻黄连翘赤小豆汤	['麻黄', '连翘', '杏仁', '赤小豆', '大枣', '桑白皮', '生姜', '甘草']	清热利湿消肿	['清热', '祛湿', '理血']
石韦散	['通草', '石韦', '王不留行', '滑石', '甘草', '当归', '白术', '瞿麦', '芍药', '冬葵子']	清热利水、活血通淋	['清热', '祛湿', '理血']
四妙勇安汤加减	['玄参', '金银花', '当归', '甘草']	清热利湿、活血化瘀	['清热', '祛湿', '理血']
四妙丸	['黄柏', '苍术', '牛膝', '薏苡仁']	清热利湿、舒筋壮骨	['清热', '祛湿', '理血']
护首汤加味	['川芎', '当归', '郁李仁', '天花粉', '白芷', '桃仁', '红花', '磁石']	活血化瘀、安神降火、利水消肿	['清热', '祛湿', '理血', '安神']
龙胆泻肝汤	['龙胆草', '黄芩', '栀子', '泽泻', '柴胡', '牡丹皮']	清热利胆、通淋利湿	['清热', '祛湿', '理气']
升阳益胃汤	['黄芪', '半夏', '人参', '白术', '柴胡', '防风', '羌活', '白芍', '陈皮', '茯苓', '泽泻', '黄连', '独活', '炙甘草', '生姜', '大枣']	益气升阳、清热除湿	['清热', '祛湿', '理气']
清胃饮	['柴胡', '地黄', '凤尾草', '枳实', '藿香', '蒲公英', '甘草']	清热理气化浊	['清热', '祛湿', '理气']
当归龙荟丸	['当归', '龙胆', '芦荟', '青黛', '栀子', '黄连', '黄芩', '黄柏', '大黄', '木香', '麝香']	清肝泻火、行气通便	['清热', '祛湿', '理气', '明目']
杨毅经验方	['柴胡', '黄芩', '车前子', '栀子', '篇蓄', '瞿麦', '滑石', '甘草']	清肝利胆、清热通淋	['清热', '祛湿', '理气', '明目']
更衣丸	['朱砂', '芦荟']	泻火、通便、安神	['清热', '祛湿', '安神']
0	['生石膏', '牛膝', '白芍', '代赭石', '大黄', '甘草', '山药', '黄芩']	清肝、清胆、泻火	['清热', '明目']
栀子清肝汤	['党参', '砂仁', '栀子', '山药', '车前子', '石膏', '茯苓', '黄连', '山楂', '甘草', '葱白']	清肝泻火	['清热', '明目']
龙胆泻肝汤	['龙胆草', '黄芩', '黑山栀', '泽泻', '木通', '车前子', '当归', '生地黄', '柴胡', '甘草']	清肝泻火	['清热', '明目']
泻青丸	['当归', '冰片', '川芎', '山栀仁', '大黄', '羌活', '防风']	清肝泻火	['清热', '明目']
钩藤散	['钩藤', '茯苓', '黄芩', '升麻', '白鲜皮', '龙齿', '玄参', '石膏', '寒水石']	清肝泻火、	['清热', '明目']
芎藭方	['川芎', '黄芩', '石膏', '当归', '秦艽', '麻黄', '桂枝', '干姜', '甘草']	清热通络	['清热', '理血']
桃核承气汤	['桃仁', '大黄', '桂枝', '芒硝', '甘草']	泻热逐瘀	['清热', '理血']
清热凉血通瘀方	['大黄', '水牛角', '生地黄', '白茅根', '牡丹皮', '苦参', '赤芍', '三七', '黄芩', '生石膏', '川芎', '血竭', '僵蚕', '车前草', '大青叶', '徐长卿']	清热凉血通瘀	['清热', '理血']
清热活血汤	['黄芩', '栀子', '胆南星', '桃仁', '大黄', '赤芍', '水蛭', '三七']	清热凉血、活血化瘀	['清热', '理血']
经验方	['三七', '郁金', '白及', '蒲黄炭', '大黄', '栀子', '瓜蒌皮', '甘草']	清热泻火、化瘀止血	['清热', '理血']
桃仁承气汤	['大黄', '芒硝', '桃仁', '当归', '芍药', '牡丹皮']	逐瘀泻热	['清热', '理血']
止血牙粉	['黄柏', '青黛', '薄荷', '芒硝']	清热止血	['清热', '理血']
中风合剂	['丹参', '川芎', '赤芍', '黄芩', '地龙', '钩藤', '伸筋草', '五灵脂', '蒲黄', '穿山甲', '三七']	清热止血、活血化瘀	['清热', '理血']
清上蠲痛汤	['当归', '川芎', '白芷', '细辛', '羌活', '独活', '防风', '菊花', '蔓荆子', '苍术', '麦冬', '黄芩', '甘草']	清利头目、散风止痛	['清热', '理血']
桃仁承气汤	['桃仁', '甘草', '芒硝', '大黄']	活血化瘀、通下泄热	['清热', '理血']
奚九一将军散	['大黄', '玄明粉', '赤小豆', '醋']	清热消肿、泻瘀通络	['清热', '理血']
胃血止散	['大黄', '黄连', '白及', '地榆', '三七']	清热泻火、止血化瘀、收敛止血	['清热', '理血']
宁血煎	['太子参', '白术', '大黄', '白及', '海螵蛸', '瓦楞子']	清热泻火、宁血止血	['清热', '理血']
泻心汤加味	['大黄', '黄连', '黄芩', '枳实', '芒硝', '牛膝', '三七', '花蕊石', '白芷']	通下泄热活血	['清热', '理血']
桃核承气汤	['桃仁', '大黄', '桂枝', '芒硝', '甘草']	泻热逐瘀	['清热', '理血']
桃核承气汤	['桃仁', '大黄', '甘草', '桂枝', '芒硝']	逐瘀泻热	['清热', '理血']
三草黛丹汤	['紫草', '牡丹皮', '侧柏叶', '黄柏', '栀子', '阿胶', '仙鹤草', '丹参']	清热凉血、活血化瘀	['清热', '理血']
桑菊饮	['桑叶', '菊花', '杏仁', '连翘', '薄荷', '桔梗', '甘草', '芦根']	清热泻肺、凉血止血	['清热', '理血']
玉女煎	['石膏', '熟地黄', '麦冬', '知母', '牛膝']	清胃泻火、凉血止血	['清热', '理血']
龙胆泻肝饮	['龙胆草', '黑山栀', '黄芪', '柴胡', '生地黄', '泽泻', '知母', '菊花', '紫草']	泻肝清热、活血化瘀	['清热', '理血']
咳血方	['青黛', '诃子', '瓜蒌仁', '海粉', '栀子']	清肝宁肺、凉血止血	['清热', '理血', '明目']
栀子清肝汤加减	['栀子', '菊花', '牡丹皮', '赤芍', '柴胡', '生地黄', '白茅根']	清肝泻火、凉血止血	['清热', '理血', '明目']
真红缓解汤	['卷柏', '紫草', '赤芍', '川芎', '红花', '莪术', '桃仁', '牡丹皮', '茜草', '龙胆草']	清肝、凉血、活血	['清热', '理血', '明目']
泻肝活血汤	['龙胆草', '黑山栀', '黄芩', '柴胡', '桃仁', '红花', '当归', '川芎', '赤芍', '泽兰', '莪术', '黄芪', '水蛭', '鸡血藤', '丹参', '青黛']	清肝泻火、活血化瘀	['清热', '理血', '明目']
血府逐瘀汤加减	['生地黄', '玄参', '牛膝', '当归', '桃仁', '赤芍', '桔梗', '牡丹皮', '红花', '柴胡', '川芎', '甘草']	活血化瘀、清热行气止痛	['清热', '理血', '理气']
逐瘀开窍汤	['黄芩', '茯苓', '三棱', '莪术', '乳香', '没药', '石斛', '桃仁', '冰片', '三七', '西洋参', '白及']	益气逐瘀、清热止血	['清热', '理血', '理气']
泻心汤加味	['黄连', '黄芩', '大黄', '白及', '海螵蛸', '地榆', '仙鹤草', '侧柏叶', '茜草']	清胃泻火、宁血止血、降气止逆	['清热', '理血', '理气']
三七郁金汤	['三七', '郁金', '牛膝', '大黄', '栀子', '瓜蒌', '海螵蛸', '白及']	清热泻火、理气化瘀止血	['清热', '理血', '理气']
金铃子散	['金铃子', '玄胡']	疏肝泄热、活血止痛	['清热', '理血', '理气']
平癜汤	['白及', '黄精', '阿胶', '赤芍', '连翘', '白茅根', '丹参', '仙鹤草']	清热凉血、益气摄血、活血化瘀	['清热', '理血', '理气']
犀角地黄汤	['犀角', '生地黄', '赤芍', '牡丹皮']	清热安神、凉血散瘀	['清热', '理血', '安神']
佛手养心汤	['当归', '川芎', '太子参', '丹参', '玄参', '麦门冬', '天冬', '远志', '柏子仁', '首乌藤', '珍珠母', '五味子', '生地黄', '栀子', '淡豆豉', '炙甘草', '浮小麦', '大枣']	活血化瘀、交通心肾、宁心安神、清热除烦	['清热', '理血', '安神']
橘皮竹茹汤加减	['生地黄', '白芍', '石斛', '麦冬', '炙甘草', '丁香', '陈皮', '竹茹', '太子参', '生姜', '代赭石']	降逆止呃、益气清热	['清热', '理气']
加味金铃子散	['川楝子', '延胡', '青皮', '赤芍', '甘草', '黑栀', '枳壳', '通草', '陈皮']	疏肝泻火	['清热', '理气']
栀子豉汤加减	['铁落花', '淡豆豉', '栀子', '陈皮', '枳壳', '香附', '柴胡', '当归', '白芍', '芦根', '鸡内金', '焦槟榔', '莱菔子', '龙胆草', '牡丹皮', '郁金', '合欢皮', '酸枣仁', '首乌藤', '五味子', '朱砂', '厚朴']	疏肝理气、清热解郁	['清热', '理气']
栀子豉汤	['栀子', '香豉']	透邪泄热、解郁除烦	['清热', '理气']
四逆散加减	['柴胡', '枳实', '枳壳', '黄芩', '黑山栀', '龙胆草', '茶叶', '番泻叶']	疏肝养胃、泄热减肥	['清热', '理气']
丁书文经验二方	['龙胆草', '栀子', '黄芩', '柴胡', '合欢皮', '菊花', '木通']	清肝泻火、疏肝解郁、	['清热', '理气', '明目']
宣白承气汤加味	['生石膏', '大黄', '苦杏仁', '栝楼', '金银花', '连翘', '败酱草', '川贝母', '天竺黄', '地龙']	清热宣肺	['清热', '解表']
桑菊饮合辛夷散加减	['桑叶', '菊花', '辛夷', '知母', '桔梗', '杏仁', '芦根', '甘草', '枇杷叶', '薄荷']	清热宣肺、利窍止鼾	['清热', '解表']
麻杏石甘汤加味	['麻黄', '杏仁', '甘草', '石膏', '桔梗', '牛膝', '栀子', '生地黄', '麦冬']	清热解毒、宣肺平喘	['清热', '解表', '痈疡', '理气']
定喘汤	['白果', '麻黄', '苏子', '甘草', '款冬花', '杏仁', '桑白皮']	宣肺降气、清热化痰	['清热', '解表', '祛痰', '理气']
麻杏石甘汤合生脉散加减	['麻黄', '杏仁', '生石膏', '党参', '麦冬', '五味子', '金银花', '连翘', '红花', '丹参', '川芎', '平贝母', '甘草']	清热宣肺、益气活血	['清热', '解表', '理血', '理气']
泻白散	['地骨皮', '桑白皮', '甘草']	泻肺清热、止咳平喘	['清热', '解表', '理气']
清胃散	['黄连', '牡丹皮', '生地黄', '黄芩', '藿香', '枇杷叶', '生石膏']	清心降火、和胃止鼾	['清热', '和解']
大补阴丸	['熟地黄', '知母', '黄柏', '龟甲', '猪脊髓']	清营透热、滋阴降火	['清热', '补益']
滋阴降火汤	['生地黄', '天冬', '熟地黄', '麦冬', '知母', '黄柏', '白芍', '当归', '白术', '陈皮', '甘草', '生姜', '大枣']	滋阴降火、生津清热	['清热', '补益']
知柏地黄丸	['知母', '黄柏', '熟地黄', '山茱萸', '山药', '泽泻', '牡丹皮', '茯苓']	滋阴降火	['清热', '补益']
虎潜丸加减	['虎骨', '牛膝', '熟地黄', '龟甲', '知母', '黄柏', '锁阳', '当归', '白芍', '陈皮', '干姜']	补益肝肾、滋阴清热	['清热', '补益']
肾气丸加减	['熟地黄', '山药', '山茱萸', '茯苓', '泽泻', '制附', '肉桂', '菟丝子', '白花蛇舌草', '石韦', '蒲公英']	补肾滋阴助阳、清利湿热	['清热', '补益']
杨毅经验方	['山药', '生地黄', '茯苓', '女贞子', '墨旱莲', '知母', '黄柏', '猪苓', '泽泻', '茯苓']	滋阴清热	['清热', '补益']
知柏地黄丸	['熟地黄', '山茱萸', '山药', '泽泻', '牡丹皮', '茯苓', '知母', '黄柏']	滋阴降火	['清热', '补益']
黄连阿胶汤	['黄连', '黄芩', '芍药', '鸡子黄', '阿胶']	滋阴泻火、交通心肾	['清热', '补益']
知柏地黄汤加减	['熟地黄', '龟甲']	滋阴降火	['清热', '补益']
知柏地黄丸	['知母', '黄柏', '山药', '山茱萸', '牡丹皮', '泽泻', '云苓', '熟地黄', '龟甲']	滋阴清热	['清热', '补益']
虎潜丸	['黄柏', '龟甲', '知母', '熟地黄', '陈皮', '白芍', '锁阳', '虎骨', '干姜']	滋阴降火、强筋壮骨	['清热', '补益']
大补阴煎	['熟地黄', '知母', '黄柏', '龟甲', '猪脊髓']	滋阴降火	['清热', '补益']
玉锁润筋起痪汤	['玉竹', '锁阳', '牛膝', '龟甲', '山药', '天冬', '麦冬', '知母', '黄柏', '木瓜', '枸杞子', '甘草']	清热保津、滋养肺胃	['清热', '补益']
虎潜丸	['熟地黄', '龟甲', '知母', '黄柏', '枸骨叶', '牛膝', '白芍', '当归', '锁阳', '陈皮', '干姜']	补益肝肾、滋阴清热	['清热', '补益']
一贯煎	['北沙参', '麦冬', '当归', '生地黄', '枸杞子', '川楝子']	滋阴清热	['清热', '补益']
消渴饮	['生地黄', '山茱萸', '怀山药', '玉竹', '女贞子', '枸杞子', '麦冬', '天花粉', '制首乌', '地骨皮', '乌梅', '砂仁', '甘草']	滋阴补肾、清热生津	['清热', '补益']
枸杞汤	['苦蒌根', '石膏', '黄连', '甘草']	养阴清热、生津止渴	['清热', '补益']
一贯煎合承气汤	['北沙参', '麦冬', '枸杞子', '玄参', '石斛', '丹参', '山药', '黄连', '五味子', '大黄', '西洋参']	滋阴清热	['清热', '补益']
黄芩汤	['黄芩', '麦门冬', '天花粉', '栀子', '生石膏', '淡竹叶']	滋阴清热止渴、	['清热', '补益']
消热止渴方	['地骨皮', '生地黄', '生石膏', '茯神', '芦根', '知母', '生姜']	清热生津止渴	['清热', '补益']
玉女煎加味	['生石膏', '生地黄']	清胃泻火、养阴增液	['清热', '补益']
阴虚燥热证治方	['黄连', '生地黄', '天花粉', '玄参', '葛根', '牛膝', '黄芩', '苍术', '麦冬', '地骨皮']	养阴清热生津	['清热', '补益']
活血调脂丸	['水蛭', '大黄', '牛黄', '黄连', '桂枝']	清热养阴	['清热', '补益']
知柏地黄丸	['熟地黄', '山茱萸', '山药', '泽泻', '茯苓', '牡丹皮', '知母', '黄柏']	滋阴降火	['清热', '补益']
滋阴凉血方	['女贞子', '墨旱莲', '生地黄', '牡丹皮', '玄参', '大蓟', '小蓟', '知母', '阿胶', '龟甲']	清热滋阴、凉血止血法	['清热', '补益']
张彩萍经验方（燥热伤肺型）	['天花粉', '黄连', '生地黄', '葛根', '怀山药', '麦冬', '山萸肉', '五味子', '地骨皮']	清热润肺、生津止渴	['清热', '补益']
张彩萍经验方（胃燥津伤型）	['生石膏', '知母', '黄连', '黑山栀', '生地黄', '麦冬', '葛根', '山萸肉', '怀山药', '玄参', '地骨皮', '大黄']	清胃泻火、养阴生津、滋阴补肾	['清热', '补益']
张彩萍经验方（肾阴亏虚型）	['山茱萸', '怀山药', '生地黄', '麦冬', '玄参', '天花粉', '地骨皮', '五味子', '知母', '黄柏']	滋阴固肾、养阴清火	['清热', '补益']
降糖1号方	['天花粉', '黄连', '生地黄', '葛根', '麦冬', '黄精', '山药']	滋阴清热、润燥生津止渴	['清热', '补益', '治燥']
加味脾阴煎	['生地黄', '白芍', '墨旱莲', '山药', '莲米', '连翘', '赤小豆', '黄连', '淡竹叶', '五味子', '大枣', '大枣', '炙甘草']	养阴益脾、润燥、清热、化斑	['清热', '补益', '治燥']
羚羊角汤	['羚羊角', '龟甲', '生地黄', '白芍', '牡丹皮', '柴胡', '薄荷', '菊花', '夏枯草', '蝉蜕', '石决明', '大枣']	滋阴清热、熄风潜阳	['清热', '补益', '治风']
地黄饮子加味	['熟地黄', '生地黄', '山茱萸', '石斛', '牡丹皮', '泽泻', '天竺黄', '钩藤', '僵蚕', '白芷', '珍珠母', '磁石', '桑叶', '桑椹']	滋补肝肾、凉肝熄风	['清热', '补益', '治风', '明目']
羚羊角汤	['羚羊角', '龟甲', '生地黄', '牡丹皮', '白芍', '柴胡', '薄荷', '蝉蜕', '菊花', '夏枯草', '石决明']	清肝熄风、育阴潜阳	['清热', '补益', '治风', '明目']
磁石五草汤	['磁石', '豨莶草', '车前草', '小蓟', '夏枯草', '益母草', '玄参']	清肝泻火、滋阴潜阳	['清热', '补益', '治风', '明目']
脑脉解痉汤2号	['牛黄', '水牛角', '龙胆草', '白芍', '桃仁', '红花']	泻热平肝、破血逐瘀、柔肝止痉	['清热', '补益', '治风', '理血']
天王补心丹	['白芍', '麦冬', '鳖甲', '生牡蛎', '知母']	滋阴清热、熄风通络	['清热', '补益', '治风', '理血']
益气解毒饮	['黄芪', '白花蛇舌草', '蒲公英', '党参', '黄芩', '柴胡', '麦冬', '地骨皮', '生地黄', '甘草', '车前子']	补气滋阴、清热解毒	['清热', '补益', '痈疡']
四妙勇安汤加味	['金银花', '玄参', '当归', '牛膝', '蒲公英', '板蓝根', '知母', '甘草']	清热解毒、养阴活血	['清热', '补益', '痈疡', '理血']
犀角地黄汤加味	['犀角', '生地黄', '牡丹皮', '赤芍', '白薇', '紫草', '知母', '南沙参', '槐花', '大青叶', '板蓝根']	清热凉血、滋阴解毒	['清热', '补益', '痈疡', '理血']
祛腐生肌散	['黄芪', '黄柏', '大黄', '当归', '象皮粉']	清热泻火、补气升阳、托毒生肌	['清热', '补益', '痈疡', '理气']
降脂通脉饮	['制首乌', '金樱子', '决明子', '薏苡仁', '茵陈', '泽泻', '山楂', '柴胡', '郁金', '大黄']	滋阴降火、行滞通脉、	['清热', '补益', '温里']
新加黄龙汤加味	['生地黄', '甘草', '人参', '大黄', '芒硝', '玄参', '麦冬', '当归', '生姜']	滋阴增液、通便泄热、调肝肾	['清热', '补益', '祛湿']
清心莲子饮	['黄芩', '麦门冬', '地骨皮', '莲子', '炙甘草', '茯苓', '车前子', '太子参', '柴胡']	清热养阴、利尿通淋	['清热', '补益', '祛湿']
知柏地黄丸	['知母', '黄柏', '生地黄', '山药', '山茱萸', '牡丹皮', '茯苓', '泽泻']	滋阴清热利湿	['清热', '补益', '祛湿']
猪苓汤合六味地黄汤加减	['猪苓', '茯苓', '泽泻', '滑石', '阿胶', '生地黄', '山药', '山茱萸', '白茅根']	滋阴清热、利湿通淋	['清热', '补益', '祛湿']
芦根散	['芦根', '赤茯苓', '麦门冬', '人参', '黄芩', '桑白皮', '甘草']	清热生津、利水除烦	['清热', '补益', '祛湿']
滋肾凉肝汤	['生地黄', '墨旱莲', '女贞子', '枸杞子', '玄参', '桑叶', '菊花', '泽泻', '石决明']	滋肾凉肝、	['清热', '补益', '明目']
抗栓防风丹	['生地黄', '何首乌', '白芍', '水蛭', '地龙', '大黄', '葛根', '黄连']	活血化瘀、清热养阴	['清热', '补益', '理血']
茜根散	['茜草', '黄芩', '栀子', '阿胶']	养阴清热止血	['清热', '补益', '理血']
知柏地黄汤	['熟地黄', '山茱萸', '山药', '泽泻', '牡丹皮', '茯苓', '知母', '黄柏']	滋阴清热、降火止血	['清热', '补益', '理血']
尿血宁方加味	['黄芪', '杜仲', '墨旱莲', '山茱萸', '紫珠', '地榆', '白花蛇舌草', '蒲黄炭', '牛膝', '赤芍', '藤梨根']	益肾清利、化瘀止血	['清热', '补益', '理血']
滋阴活血汤	['川芎', '当归', '山茱萸', '葛根', '玄参', '地龙', '牛膝', '僵蚕', '生地黄', '水蛭', '全蝎粉']	养阴清热、活血通络	['清热', '补益', '理血']
消渴降糖方	['知母', '石斛', '天花粉', '黄连', '川芎', '菖蒲', '鬼箭羽']	养阴清热、活血通经	['清热', '补益', '理血']
茜根散	['茜草', '黄芩', '阿胶', '侧柏叶', '生地黄', '甘草']	滋阴降火、宁络止血	['清热', '补益', '理血']
加味青蒿鳖甲汤	['青蒿', '鳖甲', '生地黄', '知母', '牡丹皮', '桃仁', '太子参', '山茱萸', '麦冬', '牛膝', '丹参']	养阴清热、凉血散瘀	['清热', '补益', '理血']
脑清通汤加减	['天麻', '钩藤', '菊花', '川芎', '地龙', '全蝎', '三七', '黄连', '豨莶草', '生地黄', '杜仲', '牛膝', '栀子']	清肝活血、滋补肝肾	['清热', '补益', '理血', '明目']
三草降压汤	['益母草', '夏枯草', '龙胆草', '白芍', '炙甘草']	清肝泻火、滋阴活血	['清热', '补益', '理血', '明目']
上池饮	['人参', '白术', '陈皮', '天麻', '牛膝', '茯苓', '当归', '白芍', '熟地黄', '半夏', '防风', '羌活', '红花', '乌药', '炙甘草', '桂枝', '黄芩', '酸枣仁']	补气养血、舒筋活络、通风清热、理气去痰	['清热', '补益', '理血', '理气']
上池饮	['人参', '白术', '陈皮', '天麻', '牛膝', '茯苓', '当归', '白芍', '熟地黄', '半夏', '防风', '羌活', '红花', '乌药', '炙甘草', '桂枝', '黄芩', '酸枣仁']	补气养血、舒筋活络、通风清热、理气去痰	['清热', '补益', '理血', '理气']
神效托里散	['忍冬藤', '黄芪', '当归', '甘草']	益气养血、清热通络	['清热', '补益', '理血', '理气']
清营汤	['犀角', '生地黄', '玄参', '竹叶心', '麦冬', '丹参', '黄连', '银花', '连翘']	清营养阴、透热转气、清心安神、活血化瘀	['清热', '补益', '理血', '安神']
百合固金汤	['百合', '北沙参', '黄芪', '生地黄', '麦冬', '黄芪', '当归', '赤芍', '熟地黄', '栀子', '桑白皮', '地骨皮', '桔梗', '仙鹤草', '白及']	益气养阴清热	['清热', '补益', '理气']
柴胡清骨散	['柴胡', '青蒿', '秦艽', '白芍', '地骨皮', '鳖甲', '知母', '黄芩', '甘草', '胡黄连']	泻火疏肝、养阴退热	['清热', '补益', '理气']
麦门冬汤加减	['麦冬', '党参', '乌梅', '石斛', '旋覆花', '牛膝', '枇杷叶', '代赭石', '红花', '半夏', '柿蒂', '炙甘草']	养阴生津降火、降逆止呃	['清热', '补益', '理气']
养阴清热汤	['西洋参', '生石膏', '柴胡', '青蒿', '生地黄', '麦门冬', '玄参', '南沙参', '黄芩', '鱼腥草', '金银花', '桑白皮', '桔梗', '甘草']	清热泻火、益气养阴润肺	['清热', '补益', '理气']
白虎加人参汤合六一散加减	['石膏', '知母', '人参', '甘草', '滑石', '竹叶']	泄热益气生津、	['清热', '补益', '理气']
舒糖方	['黄芪', '黄精', '苍术', '党参', '山药', '茯苓', '生地黄', '玄参', '枸杞子', '葛根', '黄连', '天花粉', '丹参', '苦瓜']	益气养阴、润肺生津、补肾生精、清热	['清热', '补益', '理气']
气阴两虚、燥热内盛证治方	['太子参', '麦冬', '五味子', '黄芪', '山药', '苍术', '玄参', '丹参', '葛根', '黄精', '杜仲', '地骨皮']	益气养阴、清热	['清热', '补益', '理气']
竹叶石膏汤	['竹叶', '石膏', '麦冬', '半夏', '人参', '粳米', '甘草']	清热生津、和胃降逆	['清热', '补益', '理气', '和解']
升阳散火汤	['葛根', '升麻', '白芍', '甘草', '人参', '羌活', '防风', '柴胡', '独活', '炙甘草', '川芎', '生地黄', '天冬', '牛膝', '白术', '防风', '炙甘草']	养血和营、滋阴清热	['清热', '补益', '和解']
当归补血汤	['当归', '熟地黄', '白芍', '川芎', '生地黄', '天冬', '牛膝', '白术', '防风', '炙甘草']	养血和营、滋阴清热	['清热', '补益', '和解']
竹叶汤	['竹叶', '麦门冬', '茯苓', '瓜蒌实', '地骨皮', '生姜', '炙甘草', '大枣', '小麦']	清热生津、和胃止渴、	['清热', '补益', '和解']
滋阴清心饮	['生地黄', '玄参', '牡丹皮', '山茱萸', '黄连', '黄芩', '阿胶', '酸枣仁', '远志', '合欢皮', '百合', '知母']	滋阴清心、安神定惊	['清热', '补益', '安神']
苦黄增液汤	['黄连', '苦参', '麦门冬', '生地黄', '玄参', '酸枣仁', '柏子仁']	滋阴泻火、宁心复脉	['清热', '补益', '安神']
天王补心丹	['人参', '茯苓', '玄参', '丹参', '桔梗', '远志', '当归', '五味子', '麦门冬', '天冬', '柏子仁', '酸枣仁']	滋阴清热、养血安神	['清热', '补益', '安神']
养血安神丸	['当归', '川芎', '白芍', '生地黄', '黄连', '陈皮', '白术', '茯神', '酸枣仁', '柏子仁', '甘草']	养心清火	['清热', '补益', '安神']
朱砂安神丸	['朱砂', '黄连', '炙甘草', '生地黄', '当归']	镇心安神、清热养血	['清热', '补益', '安神']
二阴煎	['生地黄', '麦冬', '枣仁', '甘草', '玄参', '黄连', '茯苓', '木通']	清心泻火、养阴安神	['清热', '补益', '安神']
百合地黄汤	['百合', '生地黄']	养心润肺、益阴清热	['清热', '补益', '安神']
朱砂安神丸	['朱砂', '黄连', '炙甘草', '生地黄', '当归']	镇心安神、清热养血	['清热', '补益', '安神']
清神汤	['犀角', '远志', '白鲜皮', '人参', '菖蒲', '炙甘草']	养心清热安神	['清热', '补益', '安神']
天王补心丹	['人参', '茯苓', '玄参', '丹参', '桔梗', '远志', '当归', '五味子', '麦门冬', '天冬', '柏子仁', '酸枣仁', '生地黄']	滋阴清热、养血安神	['清热', '补益', '安神']
酸枣仁汤加味	['酸枣仁', '茯苓', '川芎', '知母', '甘草', '人参', '琥珀粉']	养血安神、清热除烦	['清热', '补益', '安神']
黄连阿胶汤	['黄连', '黄芩', '白芍', '阿胶', '鸡子黄']	滋阴降火安神、	['清热', '补益', '安神']
六味地黄丸	['生地黄', '山茱萸', '天冬', '麦冬', '五味子', '牡丹皮', '黄连', '莲子心', '阿胶', '白芍', '百合', '远志']	滋阴降火、清心安神	['清热', '补益', '安神']
柴胡加龙骨牡蛎汤	['柴胡', '龙骨', '黄芩', '生姜', '铅丹', '人参', '桂枝', '半夏', '大黄', '牡蛎', '大枣']	和解清热、镇惊安神	['清热', '安神']
朱砂安神丸	['朱砂', '黄连', '炙甘草', '生地黄', '当归']	清心泻火、宁心安神	['清热', '安神']
龙胆泻肝汤	['龙胆草', '黄芩', '黑山栀', '泽泻', '木通', '车前子', '当归', '生地黄', '柴胡', '甘草']	清肝泻火、镇心安神	['清热', '安神', '明目']
黄连温胆汤	['黄连', '半夏', '竹茹', '枳实', '陈皮', '茯苓', '甘草']	清热化瘀、和胃安神	['清热', '安神', '理血', '和解']
疏肝清心饮	['黄连', '柴胡', '郁金', '龙胆草', '栀子', '豆豉', '大黄', '木通', '龙骨', '牡蛎', '生地黄', '菊花']	疏肝清心、解郁安神	['清热', '安神', '理气']
龙胆泻肝汤加减	['龙胆草', '黄芩', '栀子', '泽泻', '木通', '当归', '生地黄', '柴胡', '甘草', '车前子', '当归', '淡竹叶', '龙骨', '牡蛎', '酸枣仁', '竹茹']	疏肝泻火、镇心安神	['清热', '安神', '理气']
羚羊钩藤汤	['羚羊角', '生地黄', '钩藤', '菊花', '白芍', '茯神', '竹茹', '川贝母', '甘草', '桑叶']	凉肝熄风、增液舒筋、活络醒脑	['明目', '治风', '理血', '开窍', '清热']
羚羊钩藤汤	['羚羊角', '生地黄', '钩藤', '菊花', '白芍', '茯神', '竹茹', '川贝母', '甘草', '桑叶']	凉肝熄风、增液舒筋、活络醒脑	['明目', '治风', '理血', '开窍', '清热']
丹栀逍遥散加减	['柴胡', '薄荷', '郁金', '香附', '当归', '白芍', '白术', '茯苓', '牡丹皮', '栀子']	疏肝解郁、清肝泻火	['明目', '清热', '理气']
丹栀逍遥散	['当归', '芍药', '茯苓', '白术', '柴胡', '牡丹皮', '黑山栀', '甘草']	疏肝解郁、清肝泻火	['明目', '清热', '理气']
丹栀逍遥散	['当归', '芍药', '茯苓', '白术', '柴胡', '牡丹皮', '黑山栀', '甘草']	疏肝解郁、清肝泻火	['明目', '清热', '理气']
王行宽经验方	['柴胡', '羚羊角', '钩藤', '石决明', '蒺藜', '珍珠母', '牡蛎', '天麻', '生地黄', '白芍', '栀子', '牡丹皮']	疏肝、平肝、养肝、清肝	['明目', '理气', '治风', '补益', '清热']
益气清肝通络汤	['黄芪', '人参', '当归', '白芍', '赤芍', '天麻', '丹参', '葛根', '杜仲', '牛膝', '菖蒲', '全蝎', '甘草']	益气清肝、活血通络、滋补肝肾	['明目', '理气', '补益', '理血', '清热']
山花汤	['山楂', '赤芍', '玉竹', '路路通', '红花', '地龙', '当归', '丹参']	活血通络	['理血']
先兆汤	['血竭', '穿山甲', '草决明', '山楂', '丹参', '地龙']	活血通络	['理血']
行血祛风汤	['苏木', '水蛭', '丹参', '地龙', '穿山甲']	活血化瘀	['理血']
凉血活血化瘀方	['丹参', '赤芍', '红花', '当归', '玄参', '生地黄', '葛根', '牡丹皮', '侧柏叶', '栀子', '大黄']	凉血活血、化瘀通络	['理血']
复方蛭蚓汤	['水蛭', '地龙', '川芎', '桃仁', '红花', '丹参', '穿山甲']	活血化瘀通络	['理血']
通络止眩汤	['丹参', '葛根', '鹿衔草', '川芎', '赤芍', '自然铜', '穿山甲', '红花', '全蝎', '胆南星']	活血通络	['理血']
清脑通络汤	['草决明', '川芎', '赤芍', '牛膝', '山楂', '水蛭', '丹参', '神曲', '磁石', '菊花', '葛根', '地龙', '豨莶草']	清脑降压、活血通络	['理血']
祛痰通络汤	['茯苓', '天竺黄', '半夏', '胆南星', '川芎', '天麻', '丹参', '黄芪', '地龙', '菖蒲', '远志', '水蛭', '大黄']	祛除风痰、活血通络	['理血']
活瘀复遂汤	['红花', '桃仁', '赤芍', '地龙', '皂角刺', '土鳖虫', '续断', '牛膝']	活血化瘀通络	['理血']
活络化瘀散	['槐花', '葛根', '赤芍', '地龙', '川芎', '西红花', '三七', '豨莶草', '茄根', '胆南星', '丹参', '橘络']	活血通络	['理血']
活血通脑汤	['川芎', '丹参', '鸡血藤', '赤芍', '钩藤', '路路通', '伸筋草', '乌梢蛇', '土鳖虫', '僵蚕', '地龙', '冰片']	活血化瘀、通经活络	['理血']
五虫散	['蜈蚣', '全蝎', '土鳖虫', '地龙', '水蛭']	活血化瘀通络	['理血']
偏瘫方	['桃仁', '红花', '赤芍', '川芎', '当归', '丹参', '地龙', '伸筋草', '牛膝', '甘草']	活血化瘀、舒筋通络	['理血']
活化汤加减	['水蛭', '丹参', '地龙', '乌梢蛇', '鸡血藤', '红花']	破血逐瘀通络	['理血']
六藤汤	['络石藤', '天仙藤', '鸡血藤', '海风藤', '钩藤', '大血藤', '当归', '丹参', '赤芍', '川芎', '桃仁', '红花']	活血化瘀、舒筋活络	['理血']
通栓汤	['黄芪', '丹参', '赤芍', '红花', '当归', '川芎', '全蝎', '地龙', '蛰虫', '鸡血藤', '三七', '鳖甲', '石斛', '北沙参']	活血化瘀	['理血']
滋潜通络汤	['龙骨', '牡蛎', '石决明', '牛膝', '当归', '水蛭', '白花蛇舌草', '丹参', '鸡血藤', '生地黄', '白芍', '甘草']	活血化瘀	['理血']
癫狂梦醒汤	['桃仁', '柴胡', '香附', '木通', '赤芍', '半夏', '大腹皮', '青皮', '陈皮', '桑白皮', '苏子', '甘草']	活血化瘀	['理血']
会厌逐瘀汤	['菖蒲', '全蝎', '当归', '赤芍', '玄参', '郁金', '桃仁', '红花', '柴胡', '甘草']	化瘀利咽	['理血']
三虫息风活络汤	['水蛭', '全蝎', '蜈蚣', '丹参', '鸡血藤', '红花']	活血化瘀通络	['理血']
活血止痛汤	['桃仁', '当归', '红花', '川芎', '白芷', '赤芍', '全蝎', '蔓荆子', '延胡索', '蜈蚣', '刺蒺藜']	活血化瘀、通络止痛	['理血']
活血化瘀方	['丹参', '川芎', '红花', '赤芍', '水蛭', '益母草', '牛膝', '白茅根', '大黄', '三七']	活血化瘀	['理血']
小活络丹	['川乌', '草乌', '胆南星', '地龙', '乳香', '没药']	舒筋活络、去寒湿、化顽痰、调气化瘀	['理血']
大活络丹	['白花蛇舌草', '乌梢蛇', '威灵仙', '两头尖', '龟甲', '麻黄', '贯众', '甘草', '羌活', '肉桂', '乌药', '黄连', '草乌', '天麻', '全蝎', '何首乌', '熟地黄', '大黄']	补气血、调营卫、祛风湿、除痰热、活络止痛	['理血']
活血化瘀方	['桃仁', '红花', '赤芍', '全蝎', '川芎', '三棱', '莪术', '当归', '大黄', '水蛭', '地龙', '蜈蚣']	活血化瘀	['理血']
三化汤	['大黄', '厚朴', '枳实', '羌活']	散胃腑实热、破结利便、去风活络	['理血']
追风丸	['当归', '川芎', '白芍', '桂枝', '荆芥', '防风', '白芷', '川乌', '草乌', '续断', '白附', '僵蚕', '胆南星', '半夏', '地龙', '石膏', '雄黄', '甘草']	舒筋活血、散风通络	['理血']
凉血通瘀汤	['大黄', '水牛角', '生地黄', '桃仁', '冰片']	凉血通瘀	['理血']
加味补血汤	['黄芪', '当归', '龙眼肉', '鹿角胶', '丹参', '乳香', '没药', '甘松']	活血通络	['理血']
通窍活血汤加减	['麝香', '桃仁', '赤芍', '红花', '川芎', '黄芪', '地龙', '生姜', '葱白']	活血化瘀、通络止痛	['理血']
破血消痛汤	['羌活', '防风', '肉桂', '苏木', '连翘', '当归', '柴胡', '水蛭', '麝香']	破血化瘀、消肿止痛	['理血']
白芨血竭散	['白及', '血竭']	活血止血、治胃出血	['理血']
祛瘀止崩汤	['柴胡', '赤芍', '当归', '生地黄', '红花', '桔梗', '牛膝', '香附', '阿胶', '栀子', '牡丹皮', '黄芩', '甘草', '藕节']	活血逐瘀、凉血止崩	['理血']
脑心通胶囊	['黄芪', '赤芍', '丹参', '当归', '川芎', '桃仁', '红花', '制乳香', '制没药', '鸡血藤', '牛膝', '桂枝', '桑枝', '地龙', '全蝎', '水蛭']	舒痉通络	['理血']
脉荣汤	['黄芪', '党参', '丹参', '赤芍', '王不留行', '山楂', '海藻', '川芎', '水蛭', '地龙', '葛根', '牛膝']	活血破瘀、通络止痛	['理血']
丹参通脉汤	['丹参', '赤芍', '当归', '鸡血藤', '桑寄生', '牛膝', '川芎', '黄芪', '郁金']	活血破瘀、通络止痛	['理血']
调和汤	['大黄', '枳实', '升麻', '丹参', '菖蒲', '水牛角', '甘草']	调和气机、凉血止血	['理血']
葛根汤加减方	['葛根', '桂枝', '芍药', '甘草', '白芷', '桃仁', '红花', '川芎']	活血化瘀、舒筋通络	['理血']
活血消瘀汤	['桃仁', '红花', '川芎', '当归', '水蛭', '赤芍', '益母草', '泽兰', '地龙', '大黄']	活血化瘀、消肿通络	['理血']
血府逐瘀汤	['桃仁', '红花', '当归', '生地黄', '川芎', '赤芍', '牛膝', '桔梗', '枳壳', '甘草', '柴胡']	活血化瘀、调气行血	['理血']
化瘀清脑汤	['当归', '川芎', '桃仁', '红花', '地龙', '何首乌']	活血化瘀	['理血']
逐瘀至神丹	['当归', '大黄', '生地黄', '赤芍', '桃仁', '红花', '牡丹皮', '龟甲']	破血逐瘀	['理血']
自拟通窍活血汤	['川芎', '赤芍', '桃仁', '红花', '生姜', '半夏', '白芷', '菖蒲', '大枣', '泽泻', '枳壳']	化瘀通络	['理血']
通脉络汤	['水蛭', '地龙', '当归', '三棱', '莪术', '丹参', '黄芪']	活血化瘀	['理血']
健脑散	['红参', '土鳖虫', '当归', '枸杞子', '马钱子', '川芎', '地龙', '乳香', '没药', '全蝎', '紫河车', '鸡内金', '血竭', '甘草']	化瘀通络	['理血']
化瘀通脉汤	['丹参', '当归', '红花', '桃仁', '水蛭', '穿山甲', '乳香', '没药', '王不留行', '川芎', '甘草']	活血化瘀、通经活络	['理血']
破瘀通络汤加减	['土鳖虫', '穿山甲', '莪术', '红花', '当归', '鸡血藤', '黄芪', '延胡索']	活血破瘀、疏通脉络	['理血']
桂川合剂	['桂枝', '五味子', '麦门冬', '党参', '磁石', '紫石英', '川芎', '丹参', '葛根', '珍珠母', '龙骨', '牡蛎', '甘草']	活血化瘀、通络止痛	['理血']
李诚经验方	['川芎', '牡丹皮', '当归', '生地黄', '赤芍', '丹参', '水蛭', '牛膝', '木瓜']	化瘀通络	['理血']
奚氏清营化瘀冲剂	['益母草', '紫草', '牡丹皮', '大黄', '玄明粉']	清营凉血泻瘀	['理血']
通络活血方合抵挡汤加减	['当归', '赤芍', '桃仁', '红花', '香附', '青皮', '王不留行', '牛膝', '泽兰', '大黄']	活血化瘀通络	['理血']
活血通脉汤	['当归', '赤芍', '茯苓', '桃仁', '金银花', '白芍']	活血化瘀、通络止痛	['理血']
云南白药	['云南白药']	活血化瘀止血	['理血']
去瘀止血汤	['三七', '蒲黄', '五灵脂', '大黄']	活血化瘀止血	['理血']
三黄乌芍止血汤	['三七', '大黄', '海螵蛸', '赤芍', '郁金', '浙贝母', '茜草', '藕节', '地榆', '半夏', '甘草']	祛淤止血、清郁宁胃	['理血']
上消止血汤	['三七', '白及', '海螵蛸', '侧柏叶', '党参', '炙甘草']	活血化瘀、止血止痛	['理血']
三七白芨粉	['三七', '白及']	活血化瘀、收敛止血	['理血']
清胃散	['生地黄', '当归', '牡丹', '黄连', '升麻']	清胃凉血	['理血']
地榆散	['地榆', '黄连', '水牛角', '茜草', '黄芩', '栀子']	清肠止血	['理血']
四生丸	['荷叶', '艾叶', '侧柏叶', '生地黄']	凉血止血	['理血']
十灰散	['大蓟', '小蓟', '荷叶', '侧柏叶', '茅根', '茜草', '栀子', '大黄', '牡丹皮', '棕榈炭']	凉血止血	['理血']
白头翁汤合蒲灰散加减	['白头翁', '黄连', '黄柏', '蒲黄', '滑石', '败酱草', '金银花', '瞿麦', '蒲黄', '滑石']	凉血消瘀、通利小便	['理血']
脑衄化瘀汤	['黄芪', '海藻', '仙鹤草', '生地黄', '地龙', '泽泻', '赤芍', '当归', '川芎', '地鳖虫', '参三七', '甘草']	活血化瘀通络、	['理血']
桂枝茯苓丸	['桂枝', '茯苓', '牡丹皮', '赤芍', '桃仁']	活血、化瘀、消癥	['理血']
大黄蛰虫丸	['熟大黄', '土鳖虫', '水蛭', '虻虫', '蛴螬', '干漆', '桃仁', '苦杏仁', '黄芩', '熟地黄', '白芍', '甘草']	活血破瘀、通经消痞	['理血']
桃红四物汤	['桃仁', '红花', '当归', '赤芍', '川芎', '丹参']	活血化瘀	['理血']
桂枝汤加减	['桂枝', '芍药', '炙甘草', '生姜', '当归', '苍术', '川牛膝', '大枣', '细辛', '茯苓', '薏苡仁', '鸡血藤']	活血通络、调和营卫	['理血']
犀角地黄汤	['水牛角', '生地黄', '芍药', '牡丹皮']	清营凉血	['理血']
舒筋活络散	['生草乌', '生川乌', '麻黄', '胆南星', '半夏', '红花', '川芍', '桑枝', '透骨草', '伸筋草', '宽筋藤', '松节']	活血伸筋活络	['理血']
血府逐瘀汤	['桃仁', '红花', '当归', '生地黄', '牛膝', '赤芍', '枳壳', '桔梗', '川芎', '柴胡', '甘草']	活血化瘀	['理血']
抵挡汤	['水蛭', '虻虫', '桃仁', '大黄']	荡涤邪热、破血下瘀	['理血']
通咽止呃汤	['桃仁', '红花', '当归', '赤芍', '生地黄', '玄参', '柴胡', '枳壳', '甘草', '桔梗', '木蝴蝶', '陈皮', '竹茹', '花椒', '柿蒂', '枇杷叶', '旋覆花', '代赭石']	活血化瘀	['理血']
通咽止呃汤	['桃仁', '红花', '川芎', '赤芍', '生地黄', '当归']	活血化瘀	['理血']
调胃承气汤加味	['大黄', '芒硝', '栝楼', '胆南星', '黄芩', '菖蒲', '甘草']	舒筋活血	['理血']
活血定眩汤	['半夏', '白术', '天麻', '川芎', '当归', '葛根', '全蝎', '水蛭', '地龙', '泽泻', '何首乌']	活血定眩	['理血']
独活寄生汤	['川芎', '当归', '白芍', '生地黄', '羌活', '茯苓', '苍术', '桃仁', '牛膝', '汉防己', '陈皮', '白芷', '龙胆草', '威灵仙', '防风', '甘草']	疏筋活血	['理血']
壮筋养血汤	['白芍', '当归', '川芎', '川断', '红花', '生地黄', '牛膝', '牡丹皮', '杜仲']	活血壮筋	['理血']
补阳还五汤加减	['桃仁', '菖蒲', '红花', '丹参', '当归', '赤芍', '地龙', '黄芪', '钩藤', '白芍', '全蝎', '升麻', '甘草']	活血化瘀通络	['理血']
降糖活血方	['益母草', '广木香', '白芍', '赤芍', '川芎', '当归']	活血通络	['理血']
益气活血方	['党参', '麦冬', '黄芪', '葶苈子', '葛根', '丹参', '制附', '五味子', '泽泻', '猪苓']	益心活血	['理血']
健心复脉方	['黄芪', '丹参', '川芎', '郁金', '三七', '当归', '延胡索', '甘松', '桑寄生', '苦参', '枣仁']	益心活血	['理血']
血府逐瘀汤和二陈汤	['当归', '川芎', '牛膝', '茯苓', '半夏', '陈皮', '枳壳', '赤芍', '柴胡', '生地黄', '桃仁', '红花', '甘草']	活血化瘀、袪痰通络	['理血']
活血降红汤	['桃仁', '水蛙', '牡丹皮', '赤芍', '生地黄', '紫草', '丹参', '葛根', '红花', '甘草']	活血化瘀	['理血']
清肝化瘀汤	['龙胆草', '栀子', '黄芩', '青黛', '柴胡', '牡丹皮', '赤芍', '桃仁', '当归', '生地黄', '牛膝', '炙甘草']	清泻肝火、活血化瘀	['理血']
天麻钩藤饮	['天麻', '钩藤', '牛膝', '浙贝母', '菊花', '黄芩', '何首乌', '山药', '白术', '茯苓', '白花蛇舌草', '半枝莲', '猪苓', '秦艽', '威灵仙', '桑枝', '莲子', '白芍', '芡实', '柏子仁']	清泄肝热、活血化瘀	['理血']
桃红四物汤	['桃仁', '红花', '生地黄', '赤芍', '川芎', '当归', '半夏']	活血化瘀	['理血']
活血化瘀、开郁导痰	['当归', '熟地黄', '川芎', '白芍', '桃仁', '红花']	活血化瘀、开郁导痰	['理血']
祛湿通络汤	['白术', '茯苓', '陈皮', '半夏', '泽泻', '荷叶', '菖蒲', '黄芩', '地龙', '鸡血藤', '川木瓜', '乌梢蛇', '蜈蚣', '甘草']	豁痰利湿、祛风通络	['理血', '治风', '祛痰', '祛湿']
附桂稳步汤	['附子', '桂枝', '当归', '三七', '全蝎', '黄芪', '吴茱萸', '蜈蚣']	温阳益气、祛风活血	['理血', '治风', '理气', '温里']
通经逐瘀汤	['桃仁', '红花', '赤芍', '皂角刺', '穿山甲', '地龙', '柴胡', '连翘', '麝香']	破血逐瘀、通脉导滞	['理血', '温里']
温肾活血汤	['熟地黄', '肉苁蓉', '菟丝子', '淫羊藿', '杜仲', '山茱萸', '丹参', '红花', '川芎', '地龙', '当归', '白芍', '陈皮', '炙甘草']	温阳补虚、活血化瘀通络	['理血', '温里']
水蛭破血汤	['水蛭', '穿山甲', '土鳖虫', '苏木', '刘寄奴', '红花', '泽兰', '三棱', '莪术']	破血通脉	['理血', '温里']
活血通脉汤	['当归', '白芍', '川芎', '红花', '丹参', '桃仁', '牛膝', '鸡血藤', '乌梢蛇', '金钱白花蛇', '桂枝', '栀子', '神曲', '甘草']	活血通脉	['理血', '温里']
抵挡汤	['水蛭', '虻虫', '桃仁', '大黄']	攻逐蓄血、化瘀通脉	['理血', '温里']
活血通脉煎	['丹参', '玄参', '当归', '红花', '水蛭', '延胡索', '黄芪', '苍术', '黄柏', '牛膝']	活血通脉	['理血', '温里']
活血通脉汤	['丹参', '当归', '益母草', '红花', '穿山甲', '桃仁', '鸡血藤', '牛膝', '甘草']	活血消肿、化瘀通脉	['理血', '温里']
复方水蛭通脉汤	['水蛭', '苍术', '地龙', '三棱', '莪术', '黄柏', '当归', '薏苡仁', '牛膝', '甘草']	破血行血、化瘀通脉	['理血', '温里']
活血通脉饮	['丹参', '牛膝', '当归', '金银花', '鸡血藤', '白芍']	活血消肿、化瘀通脉	['理血', '温里']
红灵酒	['肉桂', '红花', '花椒', '樟脑', '细辛']	活血、温经、消肿、止痛	['理血', '温里']
阳和汤加减	['熟地黄', '肉桂', '麻黄', '鹿角胶', '白芥子', '生姜', '甘草']	温阳散寒、活血通络	['理血', '温里']
麻桂通络汤	['麻黄', '羌活', '西洋参', '香附', '桂枝尖', '桃仁', '地龙', '白芍', '甘草']	温经通络、	['理血', '温里']
复元通络汤	['生川乌', '生草乌', '黄芪', '当归', '白芍', '桃仁', '牛膝', '桑枝', '桂枝', '红花', '川椒']	温经活血通络	['理血', '温里']
二乌汤	['制川乌', '制草乌', '当归', '牛膝', '红花', '海马', '广三七', '续断', '杜仲', '自然铜']	温经散寒、活淤止痛	['理血', '温里']
乌附星香汤	['川乌', '天南星', '附子', '木香', '大黄', '桃仁', '红花', '姜黄', '生姜']	涤痰化饮通络	['理血', '祛痰', '祛湿']
化痰活血方	['半夏', '白术', '胆南星', '郁金', '附子', '天麻', '全蝎', '鸡血藤', '丹参', '桃仁', '红花', '川芎', '水蛭']	化痰除湿、活血通络	['理血', '祛痰', '祛湿']
化痰通络汤	['半夏', '茯苓', '胆南星', '天麻', '紫丹参', '人参', '香附', '天竺黄', '大黄']	化痰祛湿、活血通络	['理血', '祛痰', '祛湿']
化痰通络汤	['半夏', '陈皮', '枳壳', '川芎', '红花', '远志', '菖蒲', '茯神', '党参', '丹参', '炙甘草']	化痰祛湿、活血通络	['理血', '祛痰', '祛湿']
化瘀逐痰方	['丹参', '水蛭', '桃仁', '红花', '川芎', '薏苡仁', '茯苓', '山楂', '蜈蚣', '地龙', '黄芪']	涤痰化湿、活血通络	['理血', '祛痰', '祛湿']
半夏白术天麻汤	['白术', '茯苓', '桃仁', '红花', '丹参', '水半夏', '柴胡', '天麻', '枳壳', '菖蒲', '竹茹', '陈皮', '甘草', '生姜', '大枣']	化痰祛湿、活血化瘀	['理血', '祛痰', '祛湿']
阴毒内消散	['麝香', '轻粉', '丁香', '牙皂', '樟冰', '腰黄', '高良姜', '肉桂', '川乌', '甲片', '白胡椒', '乳香', '没药', '阿魏']	温经散寒、散结消肿、	['理血', '祛痰', '理气', '温里']
济生肾气丸	['附子', '茯苓', '泽泻', '山茱萸', '山药', '车前子', '牡丹', '肉桂', '牛膝', '熟地黄']	温肾化气、利水消肿	['理血', '祛湿', '理气', '温里']
清肝止血方	['龙胆草', '栀子', '夏枯草', '牡丹皮', '黄芩', '白芍', '生地黄', '地榆', '墨旱莲', '侧柏叶']	清肝泻火、降逆止血	['理血', '清热', '理气', '明目']
滋阴活血方	['生地黄', '熟地黄', '女贞子', '玄参', '川芎', '地龙', '全蝎', '黄芪', '山萸肉', '天花粉', '丹参', '僵蚕', '当归']	滋阴润燥清热、活血化瘀通络	['理血', '清热', '补益', '治燥']
党芪丹芎煎	['土鳖虫', '水蛭', '地龙', '黄芪', '三七', '丹参', '生地黄', '当归', '川芎', '甘草']	益气活血化瘀	['理血', '理气']
归脾汤加减	['党参', '黄芪', '当归', '白术', '茯神', '丹参', '葛根', '鹿衔草']	补养气血、健运脾胃	['理血', '理气']
补阳还五汤加减	['黄芪', '川芎', '赤芍', '桃仁', '红花', '当归', '葛根', '天麻']	益气活血、化瘀通络	['理血', '理气']
清栓方加减	['黄芪', '鸡血藤', '葛根', '当归', '丹参', '川芎', '水蛭', '全蝎']	益气活血、破瘀通络	['理血', '理气']
加减补阳还五汤	['黄芪', '当归', '川芎', '赤芍', '桃仁', '红花', '丹参', '牛膝', '桂枝', '地龙', '蜈蚣', '菖蒲', '甘草']	益气活血、透窍通络	['理血', '理气']
脑康汤	['菖蒲', '黄芪', '川芎', '三七', '赤芍', '葛根', '红花', '炙甘草']	益气活血通络	['理血', '理气']
益气活血通络汤	['黄芪', '党参', '当归', '川芎', '丹参', '水蛭', '鸡血藤', '地龙', '炙甘草']	益气活血通络	['理血', '理气']
芪参通络汤	['黄芪', '太子参', '三七', '鸡血藤', '水蛭', '地龙', '赤芍', '当归', '桃仁', '红花', '牛膝', '泽泻', '香附', '豨莶草']	益气活血、化瘀通络	['理血', '理气']
通络扶正汤	['黄芪', '土鳖虫', '丹参', '乌梢蛇', '蜈蚣', '地龙', '全蝎', '忍冬藤', '钩藤', '鸡血藤', '络石藤']	益气活血通络	['理血', '理气']
清脑活血汤	['黄芪', '红花', '桃仁', '当归', '丹参', '地龙', '赤芍', '水蛭', '鸡血藤', '蜈蚣', '甘草']	益气活血、搜风通络	['理血', '理气']
血府逐瘀汤	['当归', '川芎', '赤芍', '生地黄', '桃仁', '红花', '牛膝', '柴胡', '枳壳', '桔梗', '甘草']	活血逐瘀、行气止呃	['理血', '理气']
大活络丹	['白花蛇舌草', '乌梢蛇', '威灵仙', '两头尖', '草乌', '天麻', '全蝎', '何首乌', '龟甲', '麻黄', '贯众', '甘草', '羌活', '肉桂', '藿香', '乌药', '黄连', '熟地黄', '大黄', '木香', '沉香', '细辛', '赤芍', '没药', '丁香', '乳香', '僵蚕', '天南星', '青皮', '骨碎补', '白豆蔻', '安息香', '附子', '黄芩', '茯苓', '香附', '玄参', '白术', '防风', '葛根', '虎骨', '当归', '血竭', '地龙', '犀角', '麝香', '松脂', '牛黄', '冰片', '人参']	益气活血通络	['理血', '理气']
通幽汤	['桃仁', '红花', '生地黄', '熟地黄', '当归', '升麻', '甘草']	润枯槁、通壅塞、调和气血、开通胃腑	['理血', '理气']
葛根黄芪饮	['黄芪', '葛根', '丹参', '僵蚕', '鸡血藤', '当归', '蝉蜕', '全蝎']	益气活血、通络	['理血', '理气']
七味通脑络汤	['黄芪', '水蛭', '地龙', '全蝎', '僵蚕', '土鳖虫', '乌梢蛇']	益气通络	['理血', '理气']
补阳还五藤蛭散	['黄芪', '当归', '川芎', '桃仁', '红花', '地龙', '鸡血藤', '水蛭']	益气活血、化瘀通络	['理血', '理气']
芪蛭益气化瘀汤	['黄芪', '水蛭', '天麻', '川芎', '地龙', '赤芍', '葛根', '鸡血藤', '牛膝']	益气活血、化瘀通络	['理血', '理气']
化痰益气活血通络汤	['黄芪', '葛根', '丹参', '牡蛎', '胆南星', '川芎', '红花', '鸡血藤', '桂枝', '水蛭', '全蝎', '地龙', '蜈蚣']	益气活血散瘀、舒筋、活络、通血脉	['理血', '理气']
大补元煎	['人参', '山药', '熟地黄', '杜仲', '当归', '山茱萸', '枸杞子', '炙甘草']	救本培元、大补气血	['理血', '理气']
清脑活络汤	['黄芪', '赤芍', '川芎', '丹参', '当归', '红花', '桃仁', '郁金', '水蛭']	益气、活血、化瘀	['理血', '理气']
黄芪益气汤	['黄芪', '白术', '陈皮', '甘草', '党参', '当归', '柴胡', '升麻', '红花', '黄柏']	益气实卫、行血导滞	['理血', '理气']
通脉汤	['黄芪', '当归', '白芍', '桃仁', '生地黄', '川芎', '牡丹皮', '桂枝', '茯苓']	益气活血、逐瘀通络	['理血', '理气']
三虫汤	['土鳖虫', '水蛭', '地龙', '黄芪', '三七', '丹参', '生地黄', '当归', '川芎', '甘草']	破血益气化瘀	['理血', '理气']
四虫活血汤	['水蛭', '蜈蚣', '僵蚕', '全蝎', '丹参', '川芎', '山药', '甘草']	破血化瘀、益气通络	['理血', '理气']
补阳还五汤	['黄芪', '当归', '赤芍', '地龙', '川芎', '红花', '桃仁']	益气活血	['理血', '理气']
补阳还五汤	['黄芪', '当归', '川芎', '桃仁', '红花', '赤芍', '地龙']	益气活血	['理血', '理气']
消栓活络饮	['川芎', '当归', '丹参', '延胡索']	理气活血、化瘀通络	['理血', '理气']
参芪四物汤加味	['黄芪', '党参', '川芎', '赤芍', '生地黄', '地龙', '当归']	益气活血、化瘀通络	['理血', '理气']
黄芪活血汤	['黄芪', '丹参', '川芎', '桃仁', '红花', '当归', '地龙', '水蛭', '葛根', '三七']	益气活血	['理血', '理气']
加味升陷汤	['黄芪', '党参', '白术', '丹参', '川芎', '赤芍', '当归', '葛根', '菖蒲', '胆南星']	益气活血化瘀	['理血', '理气']
葛根黄芪饮	['黄芪', '葛根', '丹参', '僵蚕', '鸡血藤', '当归', '蝉蜕', '全蝎']	益气活血通络	['理血', '理气']
补阳还五汤加减方	['黄芪', '川芎', '当归', '赤芍', '牛膝', '水蛭', '地龙', '丹参', '鸡血藤', '桂枝', '菖蒲', '胆南星', '陈皮', '升麻', '山楂']	益气活血通络	['理血', '理气']
益气化瘀通络汤	['黄芪', '党参', '当归', '川芎', '丹参', '水蛭', '鸡血藤', '地龙', '炙甘草']	益气化瘀通络	['理血', '理气']
雪山愈脉汤	['路路通', '红景天', '龙牙偬木']	益气通络、活血化瘀	['理血', '理气']
黄七汤	['黄芪', '土鳖虫', '三七', '葛根']	益气活血、化瘀通络	['理血', '理气']
芪芎五虫汤	['黄芪', '川芎', '水蛭', '地龙', '全蝎', '乌梢蛇', '蜈蚣']	益气活血、通补	['理血', '理气']
通窍活血汤	['桃仁', '红花', '川芎', '赤芍', '大枣', '生姜', '葱白', '麝香']	活血化瘀、行气止痛	['理血', '理气']
芪蛭胶囊	['黄芪', '水蛭']	益气活血破瘀	['理血', '理气']
脑衄化瘀汤	['黄芪', '海藻', '仙鹤草', '生地黄', '地龙', '泽泻', '赤芍', '当归', '川芎', '土鳖虫', '三七', '甘草']	益气活血、凉血止血	['理血', '理气']
当归山甲活血汤	['当归', '黄芪', '桃仁', '牛膝', '木瓜', '防风', '附子', '没药', '桂枝', '穿山甲', '地龙', '全蝎', '红花']	益气活血、去风湿、舒筋活络止痛	['理血', '理气']
归龙汤	['三七', '地龙', '当归', '水蛭', '丹参', '黄芪', '桃仁', '川芎', '穿山甲', '鸡血藤']	益气活血	['理血', '理气']
补气活血化瘀汤	['黄芪', '党参', '川芎', '红花', '水蛭', '当归', '地龙', '赤芍', '枳实', '半夏']	益气活血通络	['理血', '理气']
顾胃健脾汤	['太子参', '山药', '白术', '茯苓', '莲子', '三七', '木香', '大黄']	益气收涩止血	['理血', '理气']
通经活络汤	['黄芪', '地龙', '全蝎', '木耳', '续断', '桃仁']	益气活血、通经活络	['理血', '理气']
补气活血汤	['黄芪', '党参', '豨莶草', '钩藤', '麻仁', '当归', '赤芍', '川芎', '丹参', '菖蒲', '地龙', '蝉蜕', '桃仁', '红花', '三七']	益气活血、化瘀通络	['理血', '理气']
散偏汤	['白芍', '川芎', '郁李仁', '柴胡', '白芥子', '香附', '白芷', '甘草']	行气活血、通络止痛	['理血', '理气']
复通颗粒	['黄芪', '党参', '三七', '川芎', '地龙', '天麻', '茜草', '牡丹皮', '牛膝']	益气活血、通络除滞	['理血', '理气']
补阳还五汤加减	['黄芪', '当归', '川芎', '桃仁', '红花', '赤芍', '地龙']	益气活血	['理血', '理气']
郁舒血畅饮	['柴胡', '香附', '郁金', '合欢皮', '素馨花', '菖蒲', '竹茹', '酸枣仁', '红景天', '丹参', '水蛭', '甘草']	疏肝解郁、活血化瘀	['理血', '理气']
补阳还五汤	['黄芪', '桃仁', '红花', '赤芍', '当归', '川芎', '地龙', '牛膝']	益气活血通络	['理血', '理气']
通栓化瘀汤，急性期	['丹参', '红花', '赤芍', '川芎', '当归', '生地黄', '桔梗', '柴胡', '牛膝', '枳壳', '甘草']	活血化瘀、疏肝行气	['理血', '理气']
醒脑煎合剂	['人参', '菖蒲', '丹参', '川芎', '大黄', '牛膝', '香附', '益智仁', '荷梗', '白术', '茯苓', '地龙', '炙甘草', '生姜']	行气活血化瘀	['理血', '理气']
补阳还五汤加减	['黄芪', '当归', '川芎', '红花', '赤芍', '水蛭', '菖蒲', '胆南星', '牡丹皮', '地龙', '路路通']	益气活血、化瘀通络	['理血', '理气']
血府逐瘀汤	['桃仁', '红花', '当归', '川芎', '赤芍', '柴胡', '枳壳', '生地黄', '川牛膝', '桔梗', '甘草']	活血化瘀、行气止痛	['理血', '理气']
血府逐瘀汤	['桃仁', '红花', '当归', '生地黄', '牛膝', '川芎', '桔梗', '赤芍', '枳壳', '甘草', '柴胡']	活血化瘀、行气止痛	['理血', '理气']
黄芪桂枝五物汤	['桃仁', '红花', '当归', '川芎', '赤芍', '柴胡', '枳壳', '生地黄', '牛膝', '桔梗', '甘草']	活血化瘀、行气止痛	['理血', '理气']
疏风活血定眩汤	['龙骨', '牡蛎', '香附', '川芎', '白芍', '生地黄', '当归', '半夏', '白芥子', '白芷', '白薇', '桃仁', '红花', '夏枯草', '远志']	疏肝活血、重镇止眩	['理血', '理气']
活血化瘀方	['当归', '苏木', '川芎', '赤芍', '桃仁', '红花', '刘寄奴', '泽兰', '菖蒲']	活血通络、舒肝理气	['理血', '理气']
脑心康方	['赤芍', '川芎', '王不留行', '当归', '地龙', '黄芪', '鸡血藤', '伸筋草']	益气活血、通经活络	['理血', '理气']
葶苈大枣泻肺汤	['葶苈子', '大枣']	疏肝理气、活血止痛	['理血', '理气']
血府逐瘀汤	['桃仁', '红花', '当归', '生地黄', '牛膝', '川芎', '桔梗', '赤芍', '枳壳', '甘草', '柴胡']	活血化瘀、行气止痛	['理血', '理气']
柴胡疏肝散	['柴胡', '陈皮', '川芎', '香附', '枳壳', '芍药', '甘草']	疏肝理气、活血止痛	['理血', '理气']
血府逐瘀汤	['桃仁', '红花', '川芎', '赤芍', '生地黄', '柴胡', '枳壳', '桔梗', '牛膝', '甘草', '当归', '丹参']	活血化瘀、行气止痛、	['理血', '理气']
血府逐瘀汤	['桃仁', '红花', '当归', '生地黄', '川芎', '赤芍', '牛膝', '桔梗', '柴胡', '枳壳', '甘草']	活血行气化瘀	['理血', '理气']
补阳还五汤	['地龙', '川芎', '红花', '桃仁']	益气活血通络	['理血', '理气']
千金苇茎汤合桃红四物汤加减	['苇茎', '桃仁', '薏苡仁', '冬瓜仁', '海蛤壳', '红花', '川芎', '白芍', '当归', '熟地黄']	活血行气化瘀	['理血', '理气']
大补元煎	['人参', '熟地黄', '杜仲', '当归', '山茱萸', '枸杞子', '炙甘草']	救本培元、大补气血	['理血', '理气']
柴胡疏肝散	['陈皮', '柴胡', '川芎', '香附', '枳壳', '芍药', '炙甘草']	疏肝理气、活血止痛	['理血', '理气']
柴胡疏肝散	['柴胡', '枳壳', '当归', '茯苓', '川芎', '香附', '白芍', '陈皮', '甘草']	疏肝行气、活血止痛	['理血', '理气']
姜黄散	['姜黄', '莪术', '红花', '肉桂', '川芎', '延胡索', '牡丹', '当归', '白芍']	破血行气、通经止痛	['理血', '理气']
复元活血汤	['柴胡', '桃仁', '瓜蒌', '当归', '红花', '甘草', '穿山甲', '大黄']	活血化瘀、疏肝通络	['理血', '理气']
顾步汤	['黄芪', '知母', '柴胡', '桔梗', '升麻', '人参', '山茱萸', '丹参', '川芎', '地龙', '鸡血藤']	益气活血化瘀	['理血', '理气']
藕节合剂合四君子汤	['藕节', '三七', '党参', '白术', '茯苓', '甘草']	益气活血、收敛止血	['理血', '理气']
温中止血汤	['党参', '白术', '蒲黄', '茜草', '炮姜', '炙甘草', '罂粟壳']	益中益气、止血消瘀	['理血', '理气']
乌黄白芨汤	['白及', '太子参', '黄芪', '白术', '海螵蛸', '地榆', '大黄']	益气凉血止血	['理血', '理气']
柴胡疏肝散	['柴胡', '陈皮', '川芎', '香附', '枳壳', '芍药', '甘草']	疏肝行气、活血止痛	['理血', '理气']
大补元煎	['人参', '山药', '熟地黄', '杜仲', '当归', '山茱萸', '枸杞子', '炙甘草']	救本培元、大补气血	['理血', '理气']
八珍汤加味	['党参', '白术', '茯苓', '当归', '白芍', '熟地黄', '竹茹', '川芎', '枇杷叶', '柿蒂', '甘草']	平补气血、扶持元气、顺气降逆止呃	['理血', '理气']
血府逐瘀汤加减	['桃仁', '红花', '当归', '川芎', '赤芍', '生地黄', '牛膝', '柴胡', '枳壳', '桔梗', '甘草']	活血、行气、降逆止呕	['理血', '理气']
人参养营汤	['人参', '黄芪', '当归', '熟地黄', '白芍', '五味子', '白术', '茯苓', '远志', '甘草', '肉桂', '生姜', '大枣', '陈皮']	补养气血	['理血', '理气']
圣愈汤合补阳还五汤加减	['党参', '黄芪', '当归', '川芎', '熟地黄', '白芍', '牛膝', '地龙', '桃仁', '红花', '鸡血藤']	益气养营、活血行瘀	['理血', '理气']
益气活血方	['党参', '白术', '熟地黄', '桂枝', '忍冬藤', '当归', '麦冬']	益气活血	['理血', '理气']
血府逐瘀汤	['当归', '生地黄', '桃仁', '红花', '枳壳', '赤芍', '柴胡', '甘草', '桔梗', '川芎', '牛膝']	理气活血	['理血', '理气']
十全大补汤	['人参', '肉桂', '川芎', '熟地黄', '茯苓', '白术', '甘草']	调补气血、气血两虚	['理血', '理气']
三石散	['人参', '白术', '当归', '白芍', '桔梗', '知母', '黑山栀', '茯苓', '连翘', '天花粉', '葛根', '肉桂', '藿香', '木香', '甘草', '芒硝', '寒水石', '石膏', '滑石', '大黄']	理气活血通络、	['理血', '理气']
玉郎消疲汤	['玉郎伞', '黄芪', '当归', '赤芍', '川芎', '地龙', '桃仁', '红花', '生地黄', '菖蒲']	益气活血通络	['理血', '理气']
柴胡桂枝汤	['柴胡', '黄芩', '半夏', '党参', '桂枝', '白芍', '炙甘草', '生姜', '大枣']	疏肝解郁、调和气血	['理血', '理气']
血府逐瘀汤	['桃仁', '红花', '当归', '生地黄', '牛膝', '川芎', '桔梗', '赤芍', '枳壳', '甘草', '柴胡']	理气解郁、活血化瘀	['理血', '理气']
郁舒血畅饮	['柴胡', '香附', '合欢皮', '素馨花', '竹茹', '郁金', '红景天', '丹参', '菖蒲', '水蛭', '酸枣仁', '甘草']	疏肝解郁、活血化瘀	['理血', '理气']
大补元煎	['人参', '山药', '熟地黄', '杜仲', '当归', '山茱萸', '枸杞子', '炙甘草']	救本培元、大补气血	['理血', '理气']
佛手益气活血汤	['当归', '川芎', '黄芪', '赤芍', '水蛭', '甘草']	益气活血	['理血', '理气']
血府逐瘀汤	['桃仁', '红花', '当归', '生地黄', '牛膝', '赤芍', '枳壳', '甘草', '桔梗', '川芎', '柴胡']	活血化瘀、行气止痛	['理血', '理气']
血府逐瘀汤	['桃仁', '红花', '当归', '生地黄', '牛膝', '川芎', '桔梗', '赤芍', '枳壳', '甘草', '柴胡']	活血化瘀、行气止痛	['理血', '理气']
血府逐瘀汤	['桃仁', '红花', '当归', '生地黄', '川芎', '赤芍', '牛膝', '桔梗', '柴胡', '枳壳', '甘草']	活血化瘀、行气止痛	['理血', '理气']
气痫汤	['丹参', '合欢皮', '赤芍', '红花', '川楝子', '陈皮', '白芷']	行气活血	['理血', '理气']
大补元煎	['人参', '山药', '熟地黄', '杜仲', '当归', '山茱萸', '枸杞子', '炙甘草']	救本培元、大补气血	['理血', '理气']
三虫汤	['黄芪', '人参', '石斛', '当归', '金银花', '牛膝', '菊花', '甘草', '蒲公英', '紫花地丁']	益气活血化瘀	['理血', '理气']
血府逐瘀汤	['桃仁', '红花', '当归', '川芎', '赤芍', '生地黄', '柴胡', '白芍', '枳壳', '炙甘草', '牛膝', '黄芪']	益气活血	['理血', '理气']
补阳还五汤	['黄芪', '赤芍', '川芎', '当归', '地龙', '桃仁', '红花']	益气活血	['理血', '理气']
益气活血汤	['黄芪', '山药', '西洋参', '枸杞子', '菟丝子', '地龙', '丹参', '猪苓', '白术', '蜈蚣']	益气活血通络	['理血', '理气']
复元活血汤	['当归', '桃仁', '红花', '大黄', '穿山甲', '柴胡', '栝楼', '炙甘草']	疏肝行气、活血止痛	['理血', '理气']
益气降浊汤	['白术', '炙甘草', '黄芪', '半夏', '党参', '山楂', '金银花', '决明子']	益气降浊、活血化瘀	['理血', '理气']
柴胡疏肝散加味	['柴胡', '陈皮', '青皮', '香附', '枳壳', '山楂', '白芍', '甘草', '郁金', '川芎', '当归', '丹参']	行气活血化瘀	['理血', '理气']
温胆汤	['半夏', '竹茹', '枳实', '陈皮', '甘草', '茯苓', '生姜', '大枣']	疏肝理气活血	['理血', '理气']
血府逐瘀汤	['桃仁', '红花', '当归', '生地黄', '川芎', '赤芍', '牛膝', '桔梗', '柴胡', '枳壳', '甘草']	疏肝理气活血	['理血', '理气']
黄芪失笑散	['黄芪', '五灵脂', '蒲黄', '川芎', '赤芍', '当归', '炙甘草', '香附']	行气活血	['理血', '理气']
桃仁红花煎	['桃仁', '红花', '丹参', '赤芍', '川芎', '延胡索', '香附', '青皮', '生地黄', '当归']	活血化瘀、理气通络	['理血', '理气']
桂枝汤加减	['桂枝', '当归', '泽兰', '赤芍', '香附', '川牛膝', '益母草', '生铁落', '大黄', '甘草']	和阳通络、调理气血	['理血', '理气']
补阳还五汤	['黄芪', '当归', '赤芍', '地龙', '川芎', '红花', '桃仁']	益气活血通络	['理血', '理气']
益气化瘀方	['黄芪', '葛根', '菖蒲', '赤芍', '川芎', '当归', '桃仁', '红花', '地龙', '郁金', '蒲黄']	益气活血、化瘀通络	['理血', '理气']
中风复元方	['黄芪', '白术', '三七', '当归', '水蛭', '地龙', '狗脊', '川芎', '红花', '当归', '甘草']	益气活血通络	['理血', '理气']
中风方	['当归', '川芎', '藁本', '天麻', '丹参', '地龙', '桑寄生', '鸡血藤', '泽泻', '牛膝', '木瓜', '大黄']	益气活血通络	['理血', '理气']
升清化瘀方	['川芎', '赤芍', '柴胡', '黄芪', '白芷', '当归', '牛膝']	升清化瘀、活血止痛	['理血', '理气']
益气化瘀方	['黄芪', '党参', '丹参', '川芎', '赤芍', '茯苓', '陈皮', '枳壳', '川牛膝', '甘草']	益气活血、化瘀通络	['理血', '理气']
0	['黄芪', '当归', '赤芍', '地龙', '川芎', '红花', '桃仁']	益气活血、化瘀通络	['理血', '理气']
桃仁红花煎	['红花', '当归', '桃仁', '香附', '延胡索', '赤芍', '川芎', '乳香', '丹参', '青皮', '熟地黄']	行气活血散瘀	['理血', '理气']
桔梗愈鼾汤	['桔梗', '甘草', '穿山甲', '海浮石', '杏仁', '皂角刺', '生地黄', '黄芪', '枳壳', '升麻', '柴胡', '桃仁']	行气活血停鼾	['理血', '理气']
活血化瘀、行气止痛	['桃仁', '红花', '丹参', '赤芍', '川芎', '香附', '当归', '生地黄', '青皮', '延胡索', '葱白']	活血化瘀、行气止痛	['理血', '理气']
蠲泣一号煎剂	['黄芪', '桂枝', '丹参', '当归', '赤芍', '红花', '川芎']	温经行气、活血化瘀	['理血', '理气', '温里']
五加皮汤	['当归', '没药', '五加皮', '芒硝', '青皮', '川椒', '香附子']	和血定痛舒筋	['理血', '和解']
五加皮汤	['当归', '没药', '五加皮', '芒硝', '青皮', '川椒', '香附子', '丁香', '麝香', '老葱', '地骨皮', '牡丹皮']	和血定痛舒筋	['理血', '和解']
滋燥养荣汤	['生地黄', '熟地黄', '白芍', '当归', '秦艽', '防风', '黄芩', '甘草']	滋阴润燥、活血通络	['理血', '补益', '治燥']
舒筋活血汤	['川芎', '熟地黄', '白芍', '当归', '羌活', '防风', '茯苓', '牛膝', '白术', '桃仁', '威灵仙', '白芷', '龙胆草', '防己', '陈皮', '炙甘草', '生姜']	养血除风、祛湿通络	['理血', '补益', '祛湿']
济生肾气丸	['熟地黄', '山药', '山茱萸', '泽泻', '茯苓', '牡丹皮', '肉桂', '附子', '牛膝', '车前子']	温补肾阳、利水消肿	['理血', '补益', '祛湿', '温里']
加味芪黄饮	['黄芪', '太子参', '生地黄', '泽泻', '山茱萸', '山药', '茯苓', '牡丹皮', '蝉蜕', '溪黄草', '女贞子', '白茅根']	益气养阴、利湿化瘀	['理血', '补益', '祛湿', '理气']
加味二仙汤	['仙茅', '仙灵脾', '巴戟天', '川芎', '当归', '知母', '黄柏', '牛膝']	温补肝肾、益气通络	['理血', '补益', '理气', '温里']
十全大补汤	['人参', '肉桂', '川芎', '熟地黄', '茯苓', '白术', '甘草', '黄芪', '当归', '白芍', '生姜', '大枣']	温补气血	['理血', '补益', '理气', '温里']
十全大补汤	['人参', '肉桂', '川芎', '熟地黄', '茯苓', '白术', '甘草', '黄芪', '当归', '白芍']	温补气血	['理血', '补益', '理气', '温里']
桃红四物汤加味	['桃仁', '红花', '首乌藤', '远志', '赤芍', '生地黄', '当归', '川芎']	活血化瘀、安神定志	['理血', '安神']
宁志膏	['酸枣仁', '人参', '朱砂', '乳香']	宁神定志、安眠止痛	['理血', '安神']
惊痫汤	['丹参', '赤芍', '红花', '首乌藤', '枣仁', '地龙', '珍珠母']	活血通络、宁心安神	['理血', '安神']
升陷汤	['黄芪', '知母', '柴胡', '桔梗', '升麻']	益气升陷	['理气']
生脉饮	['人参', '麦冬', '五味子']	益气敛阴、止汗平呃	['理气']
五磨饮子	['木香', '沉香', '枳实', '乌药', '槟榔']	行气降逆、调中止呃	['理气']
益气聪明汤	['黄芪', '人参', '甘草', '升麻', '葛根', '蔓荆子', '芍药', '黄柏']	益气升阳、聪耳明目	['理气']
小柴胡汤加减	['柴胡', '生姜', '枸杞子', '熟地黄', '党参', '川芎', '黄芪', '桃仁', '赤芍', '栀子', '龙胆草']	疏肝解郁、和解少阳	['理气']
平喘固本汤	['党参', '五味子', '冬虫夏草', '胡桃肉', '沉香', '磁石', '脐带', '紫苏子', '款冬花', '半夏', '陈皮']	补肺纳肾、降气平喘	['理气']
四逆散	['炙甘草', '枳实', '柴胡', '芍药']	透邪解郁、疏肝理脾	['理气']
麦门冬汤	['麦冬', '半夏', '人参', '甘草', '粳米', '大枣']	清养肺胃、降逆下气	['理气']
杏苏散加减	['苏叶', '款冬花', '白前', '柿蒂', '紫苏子', '半夏', '枳壳', '茯苓', '杏仁', '白芥子', '射干', '大枣', '桔梗', '陈皮', '甘草', '生姜']	泻肺降逆	['理气']
痛泻要方	['白术', '芍药', '陈皮', '防风', '麦芽', '芡实', '川楝子', '丁香', '大黄', '甘草']	疏肝实脾理气	['理气']
吴茱萸汤	['吴茱萸', '党参', '大枣', '生姜']	温肝暖胃、降逆止呕	['理气']
柴胡疏肝散加减	['柴胡', '香附', '枳壳', '陈皮', '川芎', '芍药', '甘草']	疏肝解郁、理气畅中	['理气']
麻黄杏仁甘草石膏汤	['麻黄', '杏仁', '炙甘草', '石膏']	辛凉宣泄、清肺平喘	['理气']
柴胡疏肝散	['陈皮', '柴胡', '川芎', '香附', '枳壳', '芍药', '甘草']	疏肝解郁、理气畅中	['理气']
左金丸	['黄连', '吴茱萸']	清泻肝火、降逆止呕	['理气']
麻杏石甘汤	['麻黄', '杏仁', '甘草', '石膏']	辛凉宣泄、清肺平喘	['理气']
马立平经验方	['柴胡', '陈皮', '香附', '郁金', '当归', '熟地黄', '川芍', '赤芍']	疏肝解郁	['理气']
柴胡疏肝散	['陈皮', '柴胡', '川芎', '枳壳', '芍药', '甘草', '香附']	疏肝解郁	['理气']
六郁汤	['陈皮', '半夏', '苍术', '抚芎', '赤茯苓', '栀子', '香附', '甘草', '砂仁']	理气解郁、宽中除满	['理气']
越鞠丸	['香附', '川芎', '苍术', '栀子', '神曲']	行气解郁	['理气']
升陷汤	['黄芪', '知母', '柴胡', '桔梗', '升麻']	升阳益气	['理气']
沙参麦冬汤	['麦门冬', '半夏', '人参', '甘草', '粳米', '大枣']	清养肺胃、降逆下气	['理气']
加味半夏泻心汤	['半夏', '天麻', '川牛膝', '黄芩', '干姜']	调和脾胃、降逆开痞、	['理气']
疏调血汤	['柴胡', '香附', '郁金', '苏梗', '川芎', '当归', '白芍', '薄荷']	疏肝调血	['理气']
防风通圣散合补中益气汤加减	['陈皮', '柴胡', '川芎', '枳壳', '芍药', '甘草', '香附']	疏肝解郁	['理气']
大柴胡汤	['柴胡', '黄芩', '芍药', '半夏', '生姜', '枳实', '大枣', '大黄']	疏肝理气	['理气']
舒肝消肥汤	['柴胡', '枳实', '当归', '香附', '郁金', '泽泻', '丹参', '山楂', '荷叶', '水蛭', '大黄']	疏肝理脾	['理气']
归脾汤	['白术', '当归', '茯苓', '黄芪', '远志', '龙眼肉', '酸枣仁', '人参', '木香', '炙甘草']	益气摄血	['理气']
鳖甲煎丸	['鳖甲', '射干', '黄芩', '柴胡', '鼠妇', '干姜', '大黄', '芍药', '桂枝', '葶苈', '石韦', '厚朴', '牡丹', '瞿麦', '紫葳', '半夏', '人参', '蟅虫', '阿胶', '蜂窠', '赤消', '蜣螂', '桃仁']	疏肝行气、软件消癥	['理气']
再造丸、散	['人参', '桂枝', '羌活', '防风', '川芎', '黄芪', '赤芍', '生姜', '附子', '甘草', '细辛', '大枣']	益气助阳、散寒止痛、疏风通络	['理气', '治风', '补益', '理血', '温里']
建瓴汤	['山药', '龙骨', '牡蛎', '代赭石', '生地黄', '白芍', '牛膝', '火麻仁', '天麻', '柏子仁']	平肝潜阳、滋阴熄风、开窍醒神、益气化瘀	['理气', '治风', '补益', '理血', '开窍']
玉液汤加味	['山药', '黄芪', '葛根', '五味子', '天花粉', '山茱萸', '当归', '川芎', '牛蒡子', '绞股蓝', '知母', '鸡内金']	益气养阴、活血化瘀、清热解毒	['理气', '痈疡', '补益', '理血', '清热']
附香散	['附子', '木香', '生姜']	温经散寒、理气通脉	['理气', '温里']
丁香柿蒂汤	['丁香', '柿蒂', '人参', '生姜']	温中益气、降逆止呃	['理气', '温里']
丁香柿蒂汤加味	['丁香', '柿蒂', '生姜', '半夏', '旋覆花', '麦冬', '当归', '人参', '陈皮']	温中益气、降逆平呃	['理气', '温里']
温中止呃汤	['桂枝', '白芍', '吴茱萸', '黄芪', '三棱', '白术', '赭石', '炙甘草', '生姜', '大枣']	温中散寒、降逆止呃	['理气', '温里']
温阳降糖方	['肉苁蓉', '炙黄芪', '熟地黄', '党参', '白术', '山药', '当归', '山茱萸', '陈皮', '附子', '肉桂', '柴胡', '升麻']	温阳益气	['理气', '温里']
五苓散或苓桂术甘汤或实脾饮加减	['人参', '白术', '白芍', '猪苓', '茯苓', '泽泻', '山药']	温阳化气	['理气', '温里']
当归建中汤	['当归', '肉桂', '炙甘草', '芍药', '生姜', '大枣']	温补气血、缓急止痛	['理气', '温里', '补益', '理血', '救急']
半夏白术天麻汤	['半夏', '白术', '天麻', '茯苓', '生姜', '甘草', '大枣', '陈皮']	化痰祛湿、和胃降浊	['理气', '祛痰', '祛湿', '和解']
羚羊钩藤汤合左金丸	['羚羊角', '桑叶', '川贝母', '生地黄', '钩藤', '菊花', '白芍', '甘草', '竹茹', '茯神', '黄连', '吴茱萸']	清肝潜阳、降逆止痛	['理气', '明目', '治风', '理血', '清热']
竹叶石膏汤加味	['竹叶', '石膏', '南沙参', '麦冬', '半夏', '竹茹', '丁香', '柿蒂', '羚羊角', '菊花', '夏枯草', '蝉蜕', '龟甲', '白芍', '石决明', '牡丹皮', '生地黄']	清肝熄风辛凉开窍、清降泻热止呃	['理气', '明目', '治风', '开窍', '清热']
佛手郁金汤加减	['佛手', '郁金', '黄连', '半夏', '木香', '白芷', '白术', '蒲公英', '白芍', '海螵蛸', '甘草']	疏肝清热、理气健脾、缓急止痛	['理气', '理血', '消食', '清热', '救急']
破血散瘀汤	['水蛭', '当归', '苏木', '柴胡', '羌活', '防风', '连翘', '肉桂', '麝香']	活血逐瘀、通脉行气	['理气', '理血', '温里']
破血散瘀汤	['水蛭', '当归', '苏木', '柴胡', '羌活', '防风', '连翘', '肉桂', '麝香']	活血逐瘀、通脉行气	['理气', '理血', '温里']
桃仁红花煎	['红花', '当归', '桃仁', '香附', '延胡索', '赤芍', '川芎', '乳香', '丹参', '青皮', '生地黄']	活血通脉、行气止痛	['理气', '理血', '温里']
芍药甘草汤	['白芍', '甘草', '枳实', '小茴香', '代赭石', '半夏', '生姜', '大黄']	调和肝脾、缓急止痛、降浊止呃	['理气', '理血', '救急']
和营解郁汤	['百合', '知母', '白芍', '酸枣仁', '丹参']	和营解郁	['理气', '和解']
人参养营汤	['人参', '当归', '黄芪', '白术', '茯苓', '肉桂', '熟地黄', '五味子', '远志', '陈皮', '白芍', '甘草']	温补气血、安神和胃	['理气', '和解', '安神', '补益', '理血', '温里']
赤芍地榆汤	['赤芍', '白术', '地榆', '肉桂', '炮姜', '阿胶', '白芍', '木香', '砂仁', '甘草', '吴茱萸', '白及', '海螵蛸']	凉血化瘀、温中益气、摄血补血	['理气', '补益', '理血', '温里']
醒脑开窍方	['栀子', '冰片', '郁金', '麝香']	清热解毒、镇惊止痛、安神定志、行气凉血、开窍醒脑	['理气', '安神', '痈疡', '理血', '开窍', '清热']
舒神汤	['珍珠母', '合欢皮', '川芎', '牛膝', '栀子', '菖蒲', '酸枣仁', '丹参', '黄芩', '郁金', '半夏', '茯苓']	清心安神、化瘀开窍、活血解郁	['理气', '安神', '理血', '开窍', '清热']
归脾汤加减	['党参', '茯苓', '白术', '甘草', '黄芪', '当归', '龙眼肉', '酸枣仁', '远志', '茯苓', '木香', '神曲']	健脾养心、补益气血	['理气', '安神', '补益', '理血', '消食']
归脾汤	['白术', '当归', '茯苓', '黄芪', '龙眼肉', '远志', '酸枣仁', '人参', '木香', '甘草', '生姜', '大枣']	健脾养心、补益气血	['理气', '安神', '补益', '理血', '消食']
通关散	['细辛', '薄荷', '牙皂', '雄黄']	开窍通关	['开窍']
开窍醒脑汤	['郁金', '半夏', '菖蒲', '蟾酥', '天麻', '丹参', '赤芍', '川芎', '当归', '全蝎', '蜈蚣']	醒神开窍	['开窍']
三生饮	['生南星', '生川乌', '生附子', '木香', '生姜']	温脾去寒、辛温开窍	['开窍']
宣窍醒神汤	['水牛角', '羚羊角', '龟甲', '菖蒲', '郁金', '茶叶', '白薇', '栀子仁', '半夏']	宣窍醒神	['开窍']
开窍导痰汤	['菖蒲', '远志', '郁金', '天竺黄', '半夏', '茯苓', '天南星', '泽泻', '石决明', '牛膝']	开窍导痰	['开窍']
桃核承气汤	['桃仁', '桂枝', '炙甘草', '大黄', '芒硝']	开窍醒神、	['开窍']
治出血性中风验方	['钩藤', '珍珠母', '石决明', '牛膝', '天竺黄', '菖蒲', '郁金', '陈皮', '半夏', '竹沥', '菊花', '甘草']	开窍醒神、	['开窍']
水蛭液	['水蛭']	开窍醒神、	['开窍']
利咽开窍汤	['辛夷', '连翘', '白芷', '浙贝母', '银花', '薄荷', '黄芩', '海螵蛸', '桔梗', '枳壳', '蒲公英', '苍耳子', '甘草', '白及', '三七']	利咽开窍	['开窍']
益神启窍方	['黄芪', '当归', '麝香', '桃仁', '菖蒲', '白芷']	启窍醒脑	['开窍']
王松龄经验方	['半夏', '陈皮', '天麻', '白芥子', '苦杏仁', '泽兰', '泽泻', '干荷叶', '海螵蛸']	温脾醒脑	['开窍']
镇肝熄风开窍汤	['羚羊角', '钩藤', '牡丹皮', '赭石', '黄芩', '大黄', '鱼腥草', '川楝子', '白芍', '玄参', '龟甲', '龙骨', '牡蛎']	镇肝熄风开窍	['开窍', '治风']
救急稀涎散	['生川乌', '生南星', '生附子', '陈皮', '茯苓', '竹茹', '菖蒲', '枳实', '钩藤', '川芎']	温化痰涎、祛风开窍	['开窍', '治风']
苏合香丸	['苏合香', '冰片', '麝香', '安息香', '青木香', '香附', '白檀香', '丁香', '沉香', '荜茇', '乳香', '白术', '诃子', '朱砂', '水牛角']	辛温开窍、除痰熄风	['开窍', '治风']
清降醒脑饮	['石决明', '钩藤', '地龙', '菖蒲', '牛膝', '天竺黄', '瓜蒌', '山羊角']	平肝熄风、豁痰开窍	['开窍', '治风', '祛痰']
温胆汤加味	['半夏', '陈皮', '茯苓', '枳实', '竹茹', '远志', '炙甘草', '菖蒲', '僵蚕']	豁痰祛风开窍	['开窍', '治风', '祛痰']
攻邪开闭方	['牛黄', '麝香', '胆南星', '水牛角', '羚羊角', '菖蒲', '川贝母', '全蝎', '蝉蜕', '僵蚕', '钩藤', '天竺黄', '牛黄', '麝香', '羚羊角']	平肝熄风、化痰开窍	['开窍', '治风', '祛痰']
涤痰熄风汤	['半夏', '胆南星', '茯苓', '天麻', '僵蚕', '菖蒲', '远志', '陈皮', '钩藤', '水牛角', '竹沥', '生姜', '甘草']	涤痰开窍、镇痉熄风	['开窍', '治风', '祛痰']
祛痰定痫汤	['半夏', '陈皮', '菖蒲', '附子', '人参', '白术', '白芍', '茯苓', '甘草']	豁痰开窍、镇痉熄风	['开窍', '治风', '祛痰']
熄风化瘀汤	['天麻', '钩藤', '牛膝', '白芍', '地龙', '郁金', '三七', '水蛭', '甘草', '石决明', '菊花']	熄风化痰、祛瘀醒神	['开窍', '治风', '祛痰']
苏合香丸	['白术', '木香', '犀角', '香附', '朱砂', '诃子', '檀香', '安息香', '沉香', '麝香', '丁香', '荜拨', '冰片', '麻油', '乳香']	辛温开窍、豁痰熄风	['开窍', '治风', '祛痰']
定痫丸	['天麻', '川贝母', '茯苓', '茯神', '半夏', '胆南星', '菖蒲', '全蝎', '僵蚕', '琥珀', '陈皮', '丹参', '麦冬', '远志', '朱砂']	豁痰开窍、熄风镇惊	['开窍', '治风', '祛痰']
定痫丸	['天麻', '川贝母', '茯苓', '茯神', '半夏', '胆南星', '菖蒲', '全蝎', '僵蚕', '琥珀', '陈皮', '丹参', '麦冬', '远志', '朱砂']	豁痰开窍、熄风镇惊	['开窍', '治风', '祛痰']
定痫丸	['天麻', '川贝母', '半夏', '云苓', '茯神', '胆南星', '菖蒲', '全蝎', '僵蚕', '琥珀粉', '灯芯草', '陈皮', '远志', '丹参', '麦冬', '朱砂']	豁痰开窍、熄风镇惊	['开窍', '治风', '祛痰']
化痰熄风愈延汤	['制马前子', '半夏', '胆南星', '天竺黄', '菖蒲', '郁金', '白术', '陈皮', '天麻', '茯苓']	熄风化痰开窍	['开窍', '治风', '祛痰']
菖蒲郁金方	['菖蒲', '郁金', '半夏', '胆南星', '茯苓', '白术', '山药', '远志', '僵蚕', '全蝎']	豁痰开窍熄风	['开窍', '治风', '祛痰']
金母定痫丸	['郁金', '母猪藤']	豁痰开窍、熄风定痫	['开窍', '治风', '祛痰']
痫风散	['炙全蝎', '炙蜈蚣', '熊胆', '牛黄', '马宝', '炙僵蚕', '朱砂', '半夏', '郁金', '白矾', '大黄', '橄榄']	涤痰熄风、宣窍定痫	['开窍', '治风', '祛痰']
化痰熄风通络	['胆南星', '天竺黄', '天麻', '僵蚕', '全蝎', '蜈蚣', '琥珀', '菖蒲', '白术', '茯神', '蝉蜕', '川芎', '沉香']	豁痰开窍、熄风定痫	['开窍', '治风', '祛痰']
定痫丸	['天麻', '僵蚕', '半夏', '胆南星', '钩藤', '菖蒲', '地龙', '黄芩', '远志', '龙齿']	豁痰开窍、熄风定痫	['开窍', '治风', '祛痰']
解语丹	['菖蒲', '胆南星', '附子', '天麻', '远志', '全蝎', '僵蚕']	熄风、化痰、开窍	['开窍', '治风', '祛痰']
羚角钩藤汤合定痫丸加减	['羚羊角', '钩藤', '桑叶', '川贝母', '生地黄', '竹茹', '菊花', '白芍', '茯神', '甘草']	熄风化痰、开窍定痫	['开窍', '治风', '祛痰']
羚角钩藤汤合定痫丸加减	['羚羊角', '钩藤', '桑叶', '川贝母', '生地黄', '竹茹', '菊花', '白芍', '茯神', '甘草']	息风涤痰、开窍定痫	['开窍', '治风', '祛痰']
防风散	['防风', '桑寄生', '葛根', '菊花', '细辛', '防己', '秦艽', '羚羊角', '当归', '桂枝', '茯神', '甘草']	祛风解痉、化痰通窍	['开窍', '治风', '祛痰']
大醒风汤	['生南星', '防风', '独活', '生附子', '全蝎', '甘草', '生姜']	化痰开窍、疏风通络	['开窍', '治风', '祛痰', '理血']
熄风复健汤	['天麻', '钩藤', '川芎', '大黄', '胆南星', '熟地黄']	平肝熄风、化痰开窍、活血散瘀通络	['开窍', '治风', '祛痰', '理血']
平肝熄风化痰汤	['天麻', '钩藤', '石决明', '牛膝', '黄芩']	祛风涤痰、活血开窍	['开窍', '治风', '祛痰', '理血']
解语汤	['天麻', '南星', '羌活', '防风', '菖蒲', '远志', '当归', '川芎', '人参', '肉桂', '白芷', '羚角', '枣仁', '甘草', '陈皮', '竹茹']	祛风化痰、通窍活络	['开窍', '治风', '祛痰', '理血']
通络定痫汤	['半夏', '胆南星', '陈皮', '茯苓', '菖蒲', '远志', '天麻', '川芎', '桃仁', '牛膝', '郁金', '僵蚕', '全蝎', '珍珠母', '龙齿']	化瘀通络、涤痰开窍、祛风定痫	['开窍', '治风', '祛痰', '理血']
平风汤	['麻黄', '石膏', '郁金', '桑枝', '紫苏子', '天竺黄', '辛夷', '竹茹', '桃仁', '杏仁', '莲子心', '龙胆草', '瓜蒌', '芦根', '苇茎', '金银花', '羚羊角', '水牛角', '竹沥', '石斛', '荷叶', '菖蒲', '牛黄', '水牛角', '麝香', '珍珠', '朱砂', '雄黄', '黄连', '黄芩', '栀子', '郁金', '冰片', '苏合香', '麝香', '安息香', '青木香', '香附', '白檀香', '丁香', '沉香', '乳香', '白术', '诃子', '朱砂', '犀角']	豁痰开窍、熄风通络	['开窍', '治风', '祛痰', '理血']
星蝎二陈汤	['钩藤', '地龙', '全蝎', '郁金', '茯苓', '天南星', '半夏', '陈皮', '连翘', '竹沥', '生姜']	熄风化痰、通络开窍	['开窍', '治风', '祛痰', '理血']
醒脑开窍汤	['三七', '当归', '丹参', '红花', '川芎', '郁金', '平贝母', '远志', '代赭石', '牛膝', '陈皮', '麦芽']	活血化瘀、祛痰熄风、醒脑开窍	['开窍', '治风', '祛痰', '理血']
愈脑丹	['倒扣草', '益母草', '地精草', '土鳖虫', '西洋参', '车前子', '三七', '水蛭', '茯苓', '菖蒲', '胆南星']	破血逐瘀、化痰熄风、醒脑开窍	['开窍', '治风', '祛痰', '理血']
解语丹	['附子', '菖蒲', '远志', '天麻', '全蝎', '羌活', '胆南星', '木香']	祛风化痰、宣窍通络	['开窍', '治风', '祛痰', '理血']
神仙解语丹合小陷胸汤	['黄连', '半夏', '栝楼', '胆南星', '黄芩', '附子', '羌活', '菖蒲', '薄荷', '水蛭', '丹参', '川芎', '苍术', '白术', '枳壳', '桔梗', '炙甘草']	祛风开窍、化痰活血	['开窍', '治风', '祛痰', '理血']
通络定痫汤	['半夏', '胆南星', '陈皮', '茯苓', '菖蒲', '远志', '天麻', '川芎', '桃仁', '牛膝', '郁金', '僵蚕', '全蝎', '珍珠母', '龙齿']	活血化痰通络、开窍熄风定痫	['开窍', '治风', '祛痰', '理血']
化痰饮	['竹沥', '半夏', '桑叶', '菊花', '菖蒲', '钩藤', '远志', '僵蚕', '郁金', '天竺黄', '胆南星', '茯苓', '全蝎', '羚羊角']	化痰开窍、熄风通络	['开窍', '治风', '祛痰', '理血']
解语丹	['附子', '菖蒲', '远志', '天麻', '全蝎', '羌活', '僵蚕', '南星', '木香']	祛风化痰、宣窍通络	['开窍', '治风', '祛痰', '理血']
化痰解语方	['天麻', '瓜蒌', '川芎', '茯苓', '天竺黄', '胆南星', '菖蒲', '远志', '甘草', '淫羊藿', '杜仲']	祛风化痰、宣窍通络	['开窍', '治风', '祛痰', '理血']
牛黄丸	['牛黄', '麝香', '赤箭', '僵蚕', '附子', '白花蛇舌草', '羌活', '桂枝', '干蝎']	祛风通络、芳香开窍	['开窍', '治风', '祛湿', '理血']
宣窍醒神汤	['水牛角', '羚羊角', '玳瑁', '菖蒲', '郁金', '茶叶', '白薇', '栀子仁', '半夏']	平肝熄风、醒脑通络	['开窍', '治风', '理血']
通窍活血汤	['川芎', '赤芍', '桃仁', '红花', '大枣', '生姜', '老葱', '麝香', '黄酒']	活血化瘀、通窍止痉	['开窍', '治风', '理血']
凉血醒脑熄风汤	['羚羊角', '益母草', '茯苓', '茜草', '葛根', '菖蒲', '钩藤', '当归', '生地黄', '白芍', '菊花', '胆南星', '大黄', '竹茹']	凉血醒脑、熄风通窍	['开窍', '治风', '理血']
卢尚岭经验方	['白芍', '代赭石', '玄参', '天冬', '龙骨', '牡蛎', '川楝子', '龟甲', '茵陈蒿', '牛膝', '鸡血藤', '豨莶草', '天麻', '白芥子', '地龙', '麦芽']	平肝潜阳、通络开窍	['开窍', '治风', '理血']
醒睡安方	['仙鹤草', '麻黄', '巴戟天', '花椒', '木瓜', '郁金', '大青叶', '人工牛黄']	醒神开窍、平肝舒筋	['开窍', '治风', '理血']
解语汤	['附子', '防风', '天麻', '枣仁', '羚羊角', '官桂', '甘草', '羌活']	温经通络、息风开窍	['开窍', '治风', '理血', '温里']
复方泥丸伤汤	['黄芪', '当归', '桃仁', '红花', '川芎', '土鳖虫', '三七', '水蛭', '全蝎', '牡丹皮', '赤芍', '生地黄', '水牛角', '天麻', '柴胡']	益气活血、通络开窍、息风止痉	['开窍', '治风', '理血', '理气']
地黄饮子	['熟地黄', '吴茱萸', '石斛', '麦冬', '五味子', '菖蒲', '茯苓', '远志', '肉苁蓉', '肉桂', '附子', '巴戟天', '薄荷', '生姜', '大枣']	滋阴平肝、养阴开窍、引火归元	['开窍', '治风', '补益']
羚羊角汤合六味地黄汤加减	['羚羊角', '龟甲', '蝉蜕', '石决明', '熟地黄', '怀山药', '山茱萸', '牡丹皮', '柴胡']	滋阴熄风开窍	['开窍', '治风', '补益']
健脑合剂	['黄芪', '三七', '川芎', '土鳖虫', '大黄', '泽泻', '麝香']	滋阴潜阳、活血化瘀通窍	['开窍', '治风', '补益', '理血']
养血解语汤	['当归', '川芎', '白芍', '桃仁', '红花', '天麻', '菖蒲', '郁金', '僵蚕', '天竺黄', '全蝎', '橘络', '附子', '水蛭']	养血祛风、活络开窍	['开窍', '治风', '补益', '理血']
苏合香丸	['白术', '诃子', '麝香', '香附', '檀香', '丁香', '青木香', '沉香', '安息香', '荜拔', '犀角', '乳香', '麻油', '冰片']	温中散寒、开窍醒脑、舒通神志	['开窍', '温里']
神仙解语丹	['附子', '菖蒲', '远志', '天麻', '全蝎', '羌活', '僵蚕', '南星']	化痰开窍	['开窍', '祛痰']
稀涎散	['明矾', '牙皂']	祛痰通窍、启闭	['开窍', '祛痰']
控涎丹	['甘遂', '红大戟', '狼毒', '芥子']	化痰开窍	['开窍', '祛痰']
地黄饮子	['熟地黄', '巴戟天', '山茱萸', '石斛', '肉苁蓉', '附子', '五味子', '肉桂', '云苓', '麦冬', '菖蒲', '远志', '薄荷', '生姜', '大枣']	滋肾阴、补肾阳、开窍化痰	['开窍', '祛痰']
解语丹	['附子', '菖蒲', '远志', '天麻', '全蝎', '羌活', '僵蚕', '南星', '木香']	化痰开窍	['开窍', '祛痰']
解语丹	['附子', '菖蒲', '远志', '天麻', '全蝎', '羌活', '僵蚕', '木香', '胆南星']	化痰开窍	['开窍', '祛痰']
涤心醒脑万灵丹	['甘遂', '红大戟', '白芥子', '代赭石', '朱砂', '菖蒲', '细辛', '皂角', '薄荷', '冰片', '辛夷', '麝香', '牛黄']	豁痰开窍醒神	['开窍', '祛痰']
稀涎散	['半夏', '猪牙皂']	化痰开窍	['开窍', '祛痰']
导痰汤加味	['水半夏', '陈皮', '茯苓', '甘草', '枳实', '竹茹', '菖蒲', '胆南星', '郁金']	辛温开窍、豁痰	['开窍', '祛痰']
涤心丹	['甘遂', '红大戟', '狼毒', '白芥子', '代赭石', '菖蒲', '巴豆', '冰片', '朱砂']	化痰开窍醒神	['开窍', '祛痰']
涤痰复音汤	['菖蒲', '郁金', '远志', '莲子心', '蝉蜕', '土鳖虫', '僵蚕', '全蝎', '水蛭', '胆南星', '竹茹', '甘草']	涤痰祛瘀开窍	['开窍', '祛痰']
涤痰复音汤	['半夏', '胆南星', '枳实', '茯苓', '陈皮', '菖蒲', '人参', '竹茹', '甘草', '木蝴蝶', '蝉蜕', '土鳖虫', '全蝎', '僵蚕', '水蛭']	涤痰祛痰、开窍复音	['开窍', '祛痰']
瓜蒌薤白法半夏汤合小承气汤加味方	['大黄', '菖蒲', '枳实', '厚朴', '栝楼', '薤白', '半夏', '胆南星', '地龙']	祛痰开窍	['开窍', '祛痰']
0	['大黄', '厚朴', '芒硝', '礞石', '枳实', '黄芩', '沉香']	祛痰开窍	['开窍', '祛痰']
宣窍醒神汤	['水牛角', '羚羊角', '龟甲', '菖蒲', '郁金', '栀子', '半夏', '白薇', '茶叶']	豁痰宣窍醒神	['开窍', '祛痰']
葶苈子二陈汤	['陈皮', '半夏', '茯苓', '竹茹', '合欢皮', '佩兰', '菖蒲', '葶苈子', '天竺黄', '甘草']	化痰开窍	['开窍', '祛痰']
化痰祛瘀合剂	['葶苈子', '胆南星', '半夏', '菖蒲', '川芎', '三七', '代赭石', '牛膝', '水蛭', '天竺黄', '桃仁', '鸡血藤', '大黄']	化痰祛瘀、开窍醒神	['开窍', '祛痰']
地黄饮子	['熟地黄', '大枣', '五味子', '石斛', '麦冬', '菖蒲', '远志', '附子', '肉桂', '甘草']	滋肾阴、补肾阳、开窍化痰	['开窍', '祛痰']
涤痰汤	['半夏', '陈皮', '茯苓', '枳实', '天南星', '天麻', '僵蚕', '菖蒲', '郁金', '甘草']	豁痰开窍	['开窍', '祛痰']
桑白皮汤	['桑白皮', '半夏', '紫苏子', '杏仁', '平贝母', '栀子', '黄芩', '黄连']	涤痰开窍	['开窍', '祛痰']
温胆汤	['半夏', '竹茹', '枳实', '陈皮', '茯苓', '甘草']	涤痰开窍	['开窍', '祛痰']
涤痰汤加减	['天南星', '半夏', '枳实', '茯苓', '陈皮', '菖蒲', '人参', '竹茹', '甘草']	涤痰开窍	['开窍', '祛痰']
涤痰醒脑承气汤	['大黄', '菖蒲', '麝香', '冰片', '芒硝', '枳实', '厚朴', '半夏', '水牛角', '竹茹', '黄柏']	涤痰醒脑、攻下泻浊	['开窍', '祛痰']
金水六君煎合指迷茯苓丸加减	['半夏', '茯苓', '陈皮', '甘草', '生地黄', '当归', '菖蒲', '葛根']	化痰开窍	['开窍', '祛痰']
清热醒神化痰汤	['葶苈子', '栝楼', '菖蒲', '胆南星', '桔梗', '石膏', '西洋参', '连翘', '黄芩', '鱼腥草', '苦杏仁', '炙桑白皮', '竹茹', '甘草', '黄芪', '龙葵', '桃仁']	热毒壅肺、痰瘀必窍、清泻化痰、醒神开窍	['开窍', '祛痰']
开窍导痰方	['菖蒲', '炙远志', '郁金', '天竺黄', '半夏', '茯苓', '胆南星', '泽泻', '石决明', '牛膝']	化痰开窍、	['开窍', '祛痰']
谢氏验方	['西洋参', '代赭石', '三七', '礞石', '菖蒲']	豁痰开窍、	['开窍', '祛痰']
菖蒲郁金汤	['菖蒲', '郁金', '栀子', '连翘', '牛蒡子', '竹沥', '生姜', '山慈菇', '海蛤壳', '千金子仁', '红大戟', '麝香', '朱砂', '雄黄', '滑石', '淡竹叶', '牡丹皮', '菊花']	豁痰开窍	['开窍', '祛痰']
地黄饮子	['熟地黄', '巴戟天', '山茱萸', '石斛', '肉苁蓉', '附子', '五味子', '官桂', '茯苓', '麦门冬', '菖蒲', '远志', '生姜', '大枣']	滋肾阴、补肾阳、开窍化痰	['开窍', '祛痰']
涤痰汤	['南星', '半夏', '枳实', '茯苓', '陈皮', '菖蒲', '人参', '竹茹', '甘草']	豁痰开窍	['开窍', '祛痰']
地黄饮子	['熟地黄', '巴戟天', '山茱萸', '石斛', '肉苁蓉', '附子', '五味子', '肉桂', '茯苓', '麦冬', '菖蒲', '远志']	滋肾阴、补肾阳、开窍化痰	['开窍', '祛痰']
开噤散	['人参', '黄连', '菖蒲', '丹参', '石莲子', '茯苓', '陈皮', '冬瓜仁', '陈米', '荷蒂']	开窍豁痰	['开窍', '祛痰']
地黄饮子	['石菖蒲', '远志']	滋肾阴、补肾阳、开窍化痰	['开窍', '祛痰']
开窍导痰活血汤	['菖蒲', '远志', '胆南星', '陈皮', '茯苓', '半夏', '半夏', '白术', '丹参', '牡丹皮', '赤芍', '黄芩']	豁痰开窍、芳香化浊	['开窍', '祛痰', '祛湿']
益气活血化痰方	['黄芪', '丹参', '赤芍', '葛根', '天麻', '川芎', '白术', '半夏']	活血祛瘀通络、化痰开窍止眩	['开窍', '祛痰', '理血']
中风二号	['陈皮', '半夏', '茯苓', '竹茹', '天竺黄', '全蝎', '地龙', '菖蒲', '白茅根', '大黄', '西红花', '甘草']	豁痰开窍、祛瘀通络	['开窍', '祛痰', '理血']
通窍逐瘀汤加减方	['川芎', '菖蒲', '穿山甲', '水蛭', '僵蚕', '当归', '龙骨', '丁香', '红花', '赤芍', '山药']	活血开窍、化痰醒神	['开窍', '祛痰', '理血']
活血开窍方	['红花', '赤芍', '当归', '丹参', '川芎', '地龙', '水蛭', '菖蒲', '冰片']	醒脑开窍、活血祛瘀通络	['开窍', '祛痰', '理血']
脑出血方	['天麻', '钩藤', '黄芩', '赤芍', '菖蒲', '红花', '地龙', '丹参', '牛膝', '茯苓']	化痰醒脑开窍、活血化瘀	['开窍', '祛痰', '理血']
脑衄祛瘀利水汤	['泽泻', '茯苓', '仙鹤草', '菖蒲', '车前子', '郁金', '天竺黄', '花蕊石', '葶苈子', '牛膝', '远志', '三七']	醒脑开窍、祛瘀止血、除痰行水	['开窍', '祛痰', '理血']
[truncated: 665 more rows]
