# Supplementary material for: An Improved Deep Learning Model: S-TextBLCNN for Traditional Chinese Medicine Formula Classification
Source: Front Genet. 2021 Dec 22;12:807825. doi: 10.3389/fgene.2021.807825 (PMC8727750; doi:10.3389/fgene.2021.807825)
Supplement: Supplementary file 2 [file DataSheet2.xlsx]

## Sheet: Sheet1
中药名	寒	热	温	凉	平	酸	苦	甘	辛	咸	肺	心包	心	大肠	三焦	小肠	胃	胆	膀胱	脾	肝	肾	毒性	功效
阿胶					平			甘			肺										肝	肾		['补血','滋阴','润燥','止血']
阿魏			温				苦		辛								胃			脾				['消积','化瘕','散痞','杀虫']
矮地茶					平		苦		辛		肺										肝			['镇咳','祛痰','活血','利尿','解毒']
艾叶			温				苦		辛											脾	肝	肾		['散寒','止痛','温经','止血']
艾叶炒焦			温				苦		辛											脾	肝	肾	小毒	['温经','止血','散寒','止痛','祛湿','止痒']
安息香					平		苦		辛				心							脾				['开窍','清神','行气','活血','止痛']
八角枫			温				苦		辛				心								肝		有毒	['祛风','除湿','舒筋','活络','散瘀','止痛']
八角茴香			温						辛								胃			脾	肝	肾		['温阳','散寒','理气','止痛']
八角莲				凉			苦		辛		肺										肝		有毒	['化痰','散结','祛瘀','止痛','清热','解毒']
八楞木					平		苦		辛												肝			['祛风','除湿','散瘀','止痛']
八月札	寒						苦						心			小肠			膀胱					['利尿','通淋','清心','除烦','通经','下乳']
巴豆		热							辛					大肠			胃						大毒	['泻寒积','通关窍','逐痰','行水','杀虫']
巴戟天			微温					甘	辛												肝	肾		['补肾阳','强筋骨','祛风湿']
巴戟天肉			微温					甘	辛												肝	肾		['补肾阳','强筋骨','祛风湿']
菝葜					平	酸		甘													肝	肾		['祛风湿','利小便','消肿毒']
白背叶根					平		微苦														肝			['清热','利湿','益气','固脱','疏肝','活血']
白扁豆			微温					甘									胃			脾				['健脾','化湿','和中','消暑']
白豆蔻			温						辛		肺						胃			脾				['化湿','行气','温中','止呕','开胃','消食']
白矾	寒					酸					肺			大肠						脾	肝		有毒	['祛痰','燥湿','解毒','杀虫','止血','止泻','解毒','杀虫','燥湿','止痒']
白附子			温						辛								胃				肝		有毒	['祛风痰','定惊搐','解毒','散结','止痛']
白膏	寒							甘	辛		肺									脾		肾	有毒	['杀虫','消积','解毒','生肌','燥湿','止痒']
白果					平		苦	甘			肺											肾	有毒	['敛肺','定喘','止带浊','缩小便']
白鹤灵芝					平			甘			肺													['清肺','止咳','利湿','止痒']
白花丹			温				苦		辛														有毒	['祛风','除湿','行气','活血','解毒','消肿']
白花蛇舌草				凉			微苦	微甘						大肠		小肠	胃							['清热','利湿','解毒','抗癌']
白花银背藤			温																					['补气血','止咳','驳骨','止血','生肌']
白及	微寒						苦	甘			肺						胃				肝			['收敛','止血','消肿','生肌']
白芥子			温						辛		肺						胃							['利气','燥痰','散结','消肿']
白兰花			温				苦		辛		肺						胃							['止咳','化浊']
白蔹	微寒						苦						心				胃							['清热','解毒','消痈','散结']
白马骨				凉			苦		微辛											脾	肝			['疏风','清热','利湿','解毒']
白毛藤	寒						苦	甘													肝			['请热','利湿','祛风','解毒']
白茅根	寒							甘			肺						胃		膀胱					['凉血','止血','清热','利尿']
白茅花			温					甘													肝			['止血','定痛','清热','利尿']
白前			微温				苦		辛		肺													['降气','消痰','止咳']
白屈菜			温				苦		辛		肺						胃							['破瘀','止血','解痉','止痛','止咳','平喘']
白芍	微寒					酸	苦													脾	肝			['平肝','止痛','养血','调经','敛阴','止汗']
白石花				凉				甘													肝			['明目','凉血','解毒']
白石英			微温					甘	辛		肺		心									肾		['温肺肾','安心神','利小便']
白石脂					平	酸					肺			大肠										['涩肠','止血','固脱','收湿','敛疮']
白首乌					平		微苦	甘									胃			脾	肝	肾		['补肝肾','强筋骨','益精血','健脾','消食','解毒','疗疮']
白术			温				苦	甘									胃			脾				['健脾','益气','燥湿','利水','止汗','安胎']
白苏子			温						辛		肺			大肠										['下气','消痰','润肠','通便']
白头翁	寒						苦							大肠			胃							['清热','解毒','凉血','止痢']
白薇	寒						苦			咸							胃				肝	肾		['清热','凉血','利尿']
白鲜皮	寒						苦										胃			脾				['清热','燥湿','祛风','解毒']
白药子				凉			苦		辛		肺						胃						有毒	['清热','解毒','祛风','止痛','凉血','止血']
白英	寒						苦	甘										胆			肝	肾		['清热','利湿','祛风','解毒']
白芷			温						辛		肺			大肠			胃							['散风','除湿','通窍','止痛','消肿','排脓']
百部			微温				苦	甘			肺													['润肺','止咳','杀虫','灭虱']
百合	寒							甘			肺		心											['养阴','润肺','清心','安神']
柏子仁					平			甘					心	大肠								肾		['养心','安神','止汗','润肠']
败酱					平		苦							大肠			胃				肝			['清热','解毒','消痈','排脓','祛瘀','止痛']
败酱草				凉			苦		辛					大肠			胃				肝			['清热','解毒','祛瘀','排脓']
斑蝥		热							辛								胃				肝	肾	大毒	['破血','消癥','攻毒','蚀疮','引赤','发泡']
板蓝根	寒						苦						心				胃							['清热','解毒','凉血','利咽']
半边莲					平				辛		肺		心			小肠								['利尿','消肿','清热','解毒']
半枫荷			温					甘												脾	肝			['祛风','除湿','活血','消肿']
半夏			温						辛		肺						胃			脾			有毒	['燥湿','化痰','降逆','止呕','消痞','散结']
半枝莲	寒						苦		辛		肺										肝	肾		['清热','解毒','活血','化瘀','利尿']
薄荷				凉					辛		肺										肝			['宣散','风热','清头目','透疹']
暴马丁香	微寒						苦				肺													['清肺','祛痰','止咳','平喘','利水']
北豆根	寒						苦				肺			大肠			胃						有毒	['清热','解毒','消肿','止痛']
北刘寄奴	寒						苦										胃	胆		脾	肝			['活血','祛瘀','通经','止痛','凉血','止血','清热','利湿']
北沙参	微寒						微苦	甘			肺						胃							['养阴','清肺','益胃','生津']
荜茇		热							辛					大肠			胃							['温中','散寒','下气','止痛']
荜澄茄			温						辛								胃		膀胱	脾		肾		['温中','散寒','行气','止痛']
萆薢					平		苦										胃					肾		['利湿','去浊','祛风','除痹']
蓖麻子					平			甘	辛		肺			大肠										['消肿','拔毒','泻下','通滞']
萹蓄	微寒						苦												膀胱					['利尿','通淋','杀虫','止痒']
扁蓄	微寒						苦												膀胱					['利尿','通淋','杀虫','止痒']
鳖甲	微寒									咸											肝	肾		['滋阴','潜阳','软坚','散结','退热','除蒸']
槟榔			温				苦		辛					大肠			胃							['驱虫','消积','下气','行水']
冰片	寒						苦		辛		肺		心							脾				['开窍','醒神','清热','止痛']
卜芥	寒						微苦																大毒	['清热','解毒','散结','止痛']
补骨脂			温				苦		辛											脾		肾		['温肾','助阳','纳气','止泻']
布渣叶	微寒							甘									胃			脾				['清热','消滞','利湿','退黄']
参三七			温				微苦	甘									胃				肝			['散瘀','止血','消肿','定痛']
蚕沙			温					甘	辛								胃			脾	肝			['祛风','除湿','和胃','化浊']
苍耳草	微寒						苦		辛														小毒	['祛风','清热','解毒']
苍耳子			温				苦		辛		肺												有毒	['散风湿','通鼻窍','杀虫']
苍术			温				苦		辛								胃			脾	肝			['燥湿','健脾','祛风','散寒','明目']
藏菖蒲			温				苦		辛				心				胃				肝			['温胃','消炎','止痛']
草豆蔻			温						辛								胃			脾				['燥湿','行气','温中','止呕']
草果			温						辛								胃			脾				['燥湿','温中','除痰','截疟']
草决明	微寒						苦	甘		咸				大肠							肝			['清肝','明目','润肠','通便']
草乌		热					苦		辛				心							脾	肝	肾	大毒	['祛风','除湿','散寒','止痛']
草乌叶					平				辛														有毒	['清热','解毒','止痛']
侧柏叶	寒						苦				肺									脾	肝			['凉血','止血','生发','乌发']
侧柏叶炭	寒						苦				肺									脾	肝			['凉血','止血','化痰','止咳','生发','乌发']
柴胡	微寒						苦				肺							胆			肝			['和解','表里','疏肝','升阳']
蝉花	寒							甘													肝			['清热','祛风','镇惊','明目','退翳','透疹']
蝉蜕	寒							甘			肺										肝			['散风','除热','利咽','透疹','解痉','退翳']
蟾皮				凉			苦				肺		心	大肠						脾			有毒	['清热','解毒','利水','消肿']
蟾酥			温						辛				心											['解毒','止痛','开窍','醒神']
菖蒲			温				苦		辛				心				胃							['开窍','豁痰','醒神','益智','化湿','开胃']
常山	寒						苦		辛		肺		心								肝		有毒	['截疟','涌吐','劫痰']
车前草	寒							甘			肺					小肠					肝	肾		['清热','利尿','祛痰','凉血','解毒']
车前子	微寒							甘			肺					小肠					肝	肾		['清热','利尿','渗湿','通淋','明目','祛痰']
沉香			微温				苦		辛								胃			脾		肾		['行气','止痛','温中','止呕','纳气','平喘']
陈皮			温				苦		辛		肺									脾				['理气','开胃','燥湿','化痰','治脾','胃病']
柽柳					平				辛		肺		心				胃							['发表','透疹','祛风','除湿']
赤茯苓					平			甘					心						膀胱	脾				['行水','利湿热']
赤芍	微寒						苦													脾	肝			['清热','凉血','散瘀','止痛']
赤石脂			温			酸		甘						大肠			胃							['涩肠','止血','生肌','敛疮']
赤小豆					平	酸		甘					心			小肠								['利水','消肿','解毒','排脓']
赤小豆皮					平	酸		甘					心			小肠								['解毒','排脓','利水','消肿']
茺蔚子	微寒							甘	辛			心包	心								肝			['活血','调经','清肝','明目']
虫白蜡			温					甘													肝			['止血','生肌','定痛']
虫牙药				凉			苦		微辛		肺										肝			['清热','利湿','解毒','止血']
臭灵丹草				凉			苦		辛		肺						胃							['清热','解毒','止咳','祛痰']
臭牡丹					平		苦		辛				心	大肠			胃							['祛风','除湿','平肝','潜阳','消肿','解毒']
臭梧桐					平		苦	甘						大肠			胃							['祛风','除湿','平肝','降压','解毒','杀虫']
杵头糠					平			甘						大肠			胃							['安神']
楮实	寒							甘												脾	肝	肾		['滋肾','清肝','明目','健脾','利水']
楮实子	寒							甘													肝	肾		['补肾','清肝','明目','利尿']
川贝母	微寒						苦	甘			肺		心											['清热','润肺','化痰','止咳']
川断			微温				苦		辛												肝	肾		['补肝肾','强筋骨','续折伤','止崩漏']
川连	寒						苦						心	大肠			胃	胆		脾	肝			['清热','燥湿','泻火','解毒']
川楝子	寒						苦									小肠			膀胱		肝		有毒	['舒肝','行气','止痛','驱虫']
川木通	寒						苦						心			小肠			膀胱					['清热','利尿','通经','下乳']
川木香			温				苦		辛					大肠			胃	胆		脾				['行气','止痛']
川牛膝					平		微苦	甘													肝	肾		['逐瘀','通经','通利','关节','利尿','通淋']
川朴			温				苦		辛		肺			大肠			胃			脾				['燥湿','消痰','下气','除满']
川射干	寒						苦				肺													['清热','解毒','消痰','利咽']
川乌		热					苦		辛				心							脾	肝	肾	大毒	['祛风','除湿','温经','止痛']
川芎			温						辛			心包	心					胆			肝			['活血','行气','祛风','止痛']
川续断			微温				苦		辛												肝	肾		['补肝肾','强筋骨','续折断','止崩漏']
穿破石				凉			微苦						心								肝			['祛风','通络','清热','除湿','解毒','消肿']
穿山甲	微寒									咸							胃				肝			['通经','下乳','消肿','排脓','搜风','通络']
穿山龙			温				苦	甘			肺										肝	肾		['活血','舒筋','祛风','止痛','止咳','平喘','祛痰']
穿心莲	寒						苦				肺						胃				肝			['清热','解毒','凉血','消肿']
垂盆草				凉				甘								小肠		胆			肝			['清利','湿热','解毒']
春不见	微寒						苦	甘													肝			['清热','解毒','祛风','定惊']
椿根白皮	寒						苦							大肠			胃				肝			['清热','燥湿','收涩','止带','止泻','止血']
椿皮	寒						苦							大肠			胃				肝			['清热','燥湿','收涩','止带','止泻','止血']
鈶糖			温					甘			肺						胃			脾				['补中','益气','缓急','止痛','润肺','止咳']
磁石					平					咸											肝	肾		['平肝','潜阳','聪耳','明目','镇惊','安神','纳气','平喘']
刺蒺藜			微温				苦		辛												肝		小毒	['平肝','疏肝','祛风','明目']
刺猬皮					平		苦							大肠			胃							['降气','止痛','止血','涩精']
刺五加			温				微苦		辛				心							脾		肾		['益气','健脾','补肾','安神']
刺苋菜				凉				甘						大肠			胃			脾				['清热','利湿','解毒','消肿','凉血','止血']
葱白			温						辛		肺						胃							['发表','通阳','解毒','杀虫']
葱子			温						辛		肺						胃				肝			['温肾','明目','解毒']
楤木					平		微苦	甘												脾	肝	肾		['祛风湿','利小便','散瘀血','消肿毒']
翠云草				凉				甘			肺			大肠							肝			['清热','利湿','解毒','祛瘀','止血','止咳']
大驳骨					平		苦		辛											脾	肝			['活血','止痛','化瘀','接骨','祛风','除湿','消肿','解毒']
大豆黄卷					平			甘			肺						胃			脾				['透邪','解表','利湿','解热']
大豆卷					平			甘			肺						胃			脾				['解表','祛暑','清热','利湿']
大飞扬草	寒					酸			辛		肺										肝			['清热','解毒','通乳','渗湿','止痒']
大风艾			温				苦		辛		肺						胃				肝			['温中','活血','调经','祛风','除湿','杀虫']
大风子		热							辛											脾	肝	肾	大毒	['祛风','燥湿','攻毒','杀虫']
大腹皮			微温						辛					大肠		小肠	胃			脾				['行气','宽中','行水','消肿']
大黄	寒						苦					心包	心	大肠			胃			脾	肝			['泻热','通便','凉血','解毒','逐瘀','通经']
大黄酒	寒						苦					心包		大肠			胃			脾	肝			['泻下','攻积','清热','泻火','凉血','解毒','逐瘀','通经','利湿','退黄']
大戟	寒						苦				肺									脾		肾		['泻水饮','利二便']
大蓟				凉			苦	甘					心								肝			['凉血','止血','祛瘀','消肿']
大青盐	寒									咸			心						膀胱			肾		['泻热','凉血','明目','润燥']
大青叶	寒						苦						心				胃							['清热','解毒','凉血','清斑']
大蒜			温						辛		肺						胃			脾				['行滞气','暖脾胃','消积','解毒','杀虫']
大血藤					平		苦							大肠							肝			['清热','解毒','活血','祛风','止痛']
大叶桉叶					平		苦		辛		肺		心	大肠										['清热','燥湿','抑菌','消炎']
大叶紫珠					平		苦		辛		肺						胃				肝			['散瘀','止血','消肿','止痛']
大枣			温					甘					心				胃			脾				['补中','益气','养血','安神']
代赭石	寒						苦						心								肝			['平肝','潜阳','重镇','降逆','凉血','止血']
玳瑁	寒							甘		咸			心								肝			['平肝','定惊','清热','解毒']
丹参	微寒						苦						心								肝			['祛瘀','止痛','活血','痛经','清心','除烦']
单叶蔓荆子	微寒						苦		辛								胃		膀胱		肝			['疏散','风热','清利','头目']
胆矾	寒					酸			辛									胆			肝			['涌吐','解毒','去腐']
胆南星				凉			苦		微辛		肺									脾	肝			['清热','化痰','息风','定惊']
淡豆豉				凉			苦		辛		肺						胃							['解表','除烦','宣发','郁热']
淡竹叶	寒							甘					心			小肠	胃							['清热','除烦','利尿']
当归			温					甘	辛				心							脾	肝			['补血','活血','调经','止痛','润肠','通便']
当药	寒						苦							大肠			胃				肝			['清湿热','健胃']
党参					平			甘			肺									脾				['补中','益气','健脾','益肺']
刀豆			温					甘									胃					肾		['温中','下气','止呕']
倒扣草	寒							甘			肺								膀胱		肝			['解表','清热','利水','通淋','活血','散瘀']
稻芽			温					甘									胃			脾				['和中','消食','健脾','开胃']
灯心草	微寒							甘			肺		心			小肠								['清心火','利小便']
灯芯草	微寒							甘			肺		心			小肠								['清心火','利小便']
灯盏细辛			温				微苦		辛				心								肝			['活血','通络','止痛','祛风','散寒']
地鳖虫	寒									咸											肝		小毒	['活血','散瘀','通经','止痛']
地不容	寒						苦				肺						胃				肝		有毒	['截疟','解疮毒']
地耳草				凉			微苦	甘						大肠				胆			肝			['清热','利湿','解毒','散瘀','消肿','止痛']
地枫皮			温						微辛										膀胱			肾	有毒	['祛风','除湿','行气','止痛']
地肤子	寒						苦	甘											膀胱			肾		['清利','湿热','止痒']
地骨皮	寒							甘			肺										肝	肾		['凉血','除蒸','清肺','降火']
地锦草					平		苦		辛					大肠							肝			['清热','解毒','凉血','止血']
地龙	寒									咸									膀胱	脾	肝			['清热','定惊','通络','平喘','利尿']
地稔根					平	微酸					肺									脾	肝			['活血','通络','收敛','止血']
地桃花	微寒							甘			肺									脾				['清热','解毒','去湿','止痢','祛风','止痛']
地榆	微寒					酸	苦							大肠							肝			['凉血','止血','解毒','敛疮']
颠茄草							微苦		辛															['解痉','止痛']
丁公藤			温						辛								胃			脾	肝			['祛风','除湿','消肿','止痛']
丁香			温						辛								胃			脾		肾		['温中','降逆','补肾','助阳']
东风橘			微温				苦		辛		肺										肝			['祛风','解表','化痰','止咳','理气','止痛']
冬虫夏草					平			甘			肺											肾		['补肺','益肾','止血','化痰']
冬瓜皮				凉				甘								小肠	胃							['清热','利尿','消肿']
冬瓜仁	微寒							甘			肺					小肠				脾				['清热','化痰','排脓','利湿']
冬瓜子	微寒							甘			肺					小肠				脾				['清热','化痰','排脓','利湿']
冬葵果				凉				甘						大肠		小肠			膀胱					['清热','利尿','消肿']
冬葵子	寒							甘						大肠		小肠			膀胱					['利水','通淋','滑肠','通乳']
冬凌草	微寒						苦	甘			肺						胃				肝			['清热','解毒','活血','止痛']
豆豉姜			温				苦		辛								胃			脾	肝			['祛风','除湿','温中','散寒','行气','活血']
豆蔻			温						辛								胃			脾				['化湿','消痞','行气','温中','开胃','消食']
独活			微温				苦		辛										膀胱			肾		['祛风','除湿','通痹','止痛']
独脚金					平			甘												脾	肝	肾		['平肝','消疳','健脾','消食','清热','利尿']
独一味					平		苦	甘													肝			['活血','止血','祛风','止痛']
杜仲			温					甘													肝	肾		['补肝肾','强筋骨','安胎']
杜仲叶			温						微辛												肝	肾		['补肝肾','强筋骨']
短茶风					平		微苦		辛		肺										肝			['化痰','止咳','清热','利湿','活血','化瘀']
短地茶					平		苦		辛		肺										肝			['止咳','平喘','清利','湿热','活血','化瘀']
断血流				凉			苦														肝			['收敛','止血']
莪术			温				苦		辛											脾	肝			['行气','破血','消积','止痛']
峨参			微温					甘	辛		肺						胃			脾				['益气','健脾','活血','止痛']
鹅不食草			温						辛		肺										肝			['通鼻窍','止咳']
儿茶	微寒						苦				肺		心											['收湿','生肌','敛疮','止血']
番石榴叶					平			甘						大肠										['燥湿','健脾','清热','解毒','涩肠','止泻','收敛','止血']
番泻叶	寒						苦	甘						大肠										['泻热','行滞','通便','利水']
翻白草					平		微苦	甘						大肠			胃				肝			['清热','解毒','止痢','止血']
矾石	寒					酸					肺			大肠						脾	肝			['解毒','杀虫','燥湿','止痒','止血','止泻','祛痰']
方解石	寒						苦		辛															['清热','泻火','解毒']
防风			温					甘	辛										膀胱	脾	肝			['发表','祛风','除湿']
防风草			温				苦		辛															['祛风','除湿','解毒','止痛']
防己	寒						苦				肺								膀胱					['利水','消肿','祛风','止痛']
飞滑石	寒							甘			肺						胃		膀胱					['利尿','通淋','清热','解暑','祛湿','敛疮']
飞龙掌血			温				苦		辛								胃			脾				['祛风','止痛','散瘀','止血']
飞天蠄蟧					平		苦																有毒	['清热','止咳','祛风','除湿']
榧子					平			甘			肺			大肠			胃							['杀虫','消积','润肺','止咳','润燥','通便']
粉萆薢					平		苦										胃					肾		['利湿','去浊','祛风','除痹']
粉草					平		苦														肝			['散瘀','止痛','收敛','止血']
粉丹皮	微寒						苦		辛				心								肝			['清热','凉血','活血','化瘀']
粉甘草					平						肺		心				胃			脾				['补脾','益气','清热','解毒','祛痰','止咳','缓急','止痛','调和诸药']
粉葛				凉				甘	辛								胃			脾				['解肌','退热','生津','透疹','升阳','止泻']
枫香脂					平		微苦		辛		肺									脾				['活血','止痛','解毒','生肌','凉血']
蜂房					平			甘									胃							['祛风','攻毒','杀虫','止痛']
蜂蜜					平			甘			肺			大肠						脾				['补中','润燥','止痛','解毒']
凤凰衣					平			甘			肺						胃			脾				['养阴','清肺','敛疮','消翳','接骨']
凤尾草	寒						微苦						心	大肠							肝			['清热','利湿','凉血','止血','消肿','解毒']
凤眼果					平			甘						大肠		小肠	胃							['和胃','消食','解毒','杀虫']
佛甲草	寒							甘			肺		心							脾	肝			['清热','解毒']
佛手			温			酸	苦		辛		肺									脾	肝			['舒肝','理气','和胃','止痛']
伏龙肝			温						辛								胃			脾				['收敛','止血','温中','止呕','止泻']
扶芳藤			微温				微苦													脾	肝	肾		['益气血','补肝肾','舒筋','活络']
扶桑花	寒							甘			肺		心							脾	肝			['清肺','化痰','凉血','解毒']
茯苓					平			甘			肺		心							脾		肾		['利水','渗湿','健脾','宁心']
茯苓皮					平			甘			肺									脾		肾		['利水','消肿']
茯神					平			甘					心							脾				['宁心','安神','利水']
浮萍	寒								辛		肺													['宣散','风热','透疹','利尿']
浮小麦				凉				甘					心											['除虚热','止汗']
附子		热						甘	辛				心							脾		肾	大毒	['回阳','救逆','补火','助阳','散寒','止痛']
覆盆子			温			酸		甘											膀胱			肾		['益肾','固精','缩尿']
甘草					平			甘			肺		心				胃			脾				['补脾','益气','止咳','祛痰','缓急','定痛','调和','药性']
甘菊花	微寒						苦	甘			肺										肝			['疏散风热','平抑肝阳','清肝','明目','清热','解毒']
甘李根白皮	寒						苦			咸											肝			['清热','下气']
甘松			温					甘	辛								胃			脾				['理气','止痛','开郁','醒脾']
甘肃丹参	微寒						苦						心								肝			['祛瘀','止痛','活血','调经','养心','除烦','排脓','生肌']
甘遂	寒						苦				肺			大肠								肾		['泻水','逐饮','消肿','散结']
干姜		热							辛		肺		心				胃			脾		肾		['温中','散寒','回阳','通脉','燥湿','消痰']
干漆			温						辛											脾	肝			['破瘀血','消积','杀虫']
岗梅根				凉			苦	甘			肺			大肠							肝			['清热','解毒','生津','止渴','利咽','消肿','散瘀','止痛']
岗稔根					平			甘													肝	肾		['舒肝','通络','止痛']
杠板归	寒					酸					肺								膀胱					['清热','解毒','利咽','祛湿']
高良姜		热							辛								胃			脾				['温胃','止呕','散寒','止痛']
藁本			温						辛										膀胱					['散寒','除湿','止痛']
隔山消					平		苦	甘									胃			脾	肝			['消食','健胃','理气','止痛','催乳']
葛根				凉				甘	辛								胃			脾				['解肌','退热','生津','透疹','升阳','止泻']
梗米					平			甘			肺						胃			脾				['补气','健脾','止泻','除烦','止渴']
功劳木	寒						苦							大肠			胃				肝			['清热','燥湿','泻火','解毒']
钩藤				凉				甘				心包	心								肝			['清热','平肝','息风','定惊']
狗肝菜				凉			微苦	甘			肺		心								肝			['清热','凉血','利尿','解毒']
狗脊			温				苦	甘													肝	肾		['补肝肾','强腰膝','祛风湿']
狗肾			温							咸												肾		['温肾','壮阳','补益','精髓']
枸骨叶				凉			苦														肝	肾		['清热','养阴','平肝','益肾']
枸杞子					平			甘													肝	肾		['滋补','肝肾','益精','明目']
谷精草					平			甘	辛		肺										肝			['疏散','风热','明目','退翳']
谷芽			温					甘									胃			脾				['消食','和中','健脾','开胃']
骨碎补			温				苦														肝	肾		['续伤','止痛','补肾','强骨']
瓜蒂	寒						苦										胃						有毒	['涌吐','痰食','祛湿','退黄']
瓜蒌	寒						微苦	甘			肺			大肠			胃							['清热','涤痰','宽胸','散结','润燥','滑肠']
瓜蒌皮	寒							甘			肺						胃							['清肺','化痰','利气','宽胸']
瓜子金					平		苦		辛		肺													['祛痰','止咳','活血','消肿','解毒','止痛']
关黄柏	寒						苦												膀胱			肾		['清热','燥湿','泻火','除蒸','解毒','疗疮']
官桂			温				苦		辛		肺		心						膀胱					['发汗','解肌','温经','通脉','助阳','化气','降逆','平冲']
贯叶金丝桃	寒								辛												肝			['疏肝','解郁','清热','利湿','消肿','通乳']
贯众	微寒						苦										胃				肝			['清热','解毒','杀虫','止血']
广东海桐皮	微寒						微苦		辛												肝	肾		['祛风','祛湿','通经','活络','利水','消肿']
广东刘寄奴			温				苦						心							脾	肝			['破血','通经','止血','止痛','消积','除胀']
广东王不留行					平			甘						大肠			胃				肝			['活血','通经','下乳','消肿']
广藿香			微温						辛		肺						胃			脾				['芳香','化浊','开胃','止呕','发表','解暑']
广金钱草				凉				甘											膀胱		肝	肾		['清热','除湿','利尿','通淋']
广昆布	寒									咸												肾		['清热','解毒','软坚','消痰','利水','降血压']
广山药					平			甘			肺						胃			脾				['健脾','养胃','生津','益肺','补肾','涩精']
广升麻	微寒							微甘	辛		肺						胃							['清热','解毒','发表','透疹']
广郁金	寒						苦		辛		肺		心					胆			肝			['活血','止痛','行气','解郁','清心','凉血','利胆','退黄']
广枣					平	酸		甘																['行气','活血','养心','安神']
龟甲	微寒							甘		咸			心								肝	肾		['滋阴','潜阳','益肾','强骨','养血','补心']
鬼箭羽	寒						苦													脾	肝			['行血','通经','散瘀','止痛']
鬼针草	寒						苦				肺			大肠							肝			['清热','解毒','活血','祛风']
桂花			温						辛		肺									脾		肾		['温肺','化饮','散寒','止痛']
桂皮			温					甘	辛					大肠			胃				肝	肾		['温脾胃','暖肝肾','祛寒','止痛','散瘀','消肿']
桂枝			温					甘	辛		肺		心						膀胱					['发表','解肌','温经','通脉','助阳','化气','平冲','降气']
蛤蚧					平					咸	肺											肾		['补肺','益肾','纳气','定喘','助阻','益精']
蛤蟆油					平			甘		咸	肺											肾		['补肾','益精','养阴','润肺']
孩儿茶				凉			苦				肺		心											['清热','化痰','止血','消食','生肌','定痛']
海参					平			甘		咸	肺											肾		['补肾','益精','养血','润燥','止血']
海带	寒									咸							胃				肝	肾		['消痰','软坚','散结','利水','消肿']
海风藤			微温						辛												肝			['祛风','除湿','舒筋','活络']
海浮石	寒									咸	肺											肾		['清肺','化痰','软坚','散结']
海狗肾		热								咸												肾		['暖肾','壮阳','益精','补髓']
海蛤壳	微寒									咸	肺						胃				肝			['清肺','化痰','软坚','利水','制酸','敛疮']
海金沙	寒							甘								小肠			膀胱					['清利','湿热','通淋','止痛']
海龙			温					甘		咸											肝	肾		['温肾','壮阳','散结','消肿']
海马			温					甘		咸											肝	肾		['温肾','壮阳','散结','消肿']
海螵蛸			温							咸										脾		肾		['收敛','止血','涩精','止带','制酸','敛疮']
海桐皮					平		苦		辛											脾	肝			['祛风湿','通经络','止痛']
海芋				凉					辛				心	大肠				胆			肝			['清热','解毒','散结','消肿']
海藻	寒						苦			咸							胃				肝	肾		['软坚','散结','消痰','利水']
寒水石	寒								辛	咸			心				胃					肾		['清热','泻火']
蔊菜			微温				苦		辛		肺										肝			['祛痰','止咳','解表','散寒','活血','解毒','利湿','退黄']
汉防己			微温					甘	辛										膀胱	脾	肝			['解表','祛风','胜湿','止痛','止痉']
汉桃叶			温				微苦										胃			脾	肝			['祛风','止痛','舒筋','活络']
诃子					平	酸	苦				肺			大肠										['涩肠','敛肺','降水','利咽']
合欢花					平			甘					心								肝			['解郁','安神']
合欢皮					平			甘			肺		心								肝			['解郁','安神','活血','消肿']
何首乌			温				苦	甘					心								肝	肾		['解毒','消痈','润肠','通便']
荷梗					平		苦												膀胱	脾				['解暑','清热','理气','化湿']
荷叶					平		苦										胃			脾	肝			['清暑','化湿','升发','清阳','凉血','止血']
荷叶蒂					平		苦																	['清暑','去湿','和血','安胎']
核桃仁			温					甘			肺			大肠								肾		['温补','肺肾','定喘','化痰','润肠','涩精']
鹤草芽				凉			苦																	['驱虫','解毒','消肿']
鹤虱					平		苦		辛								胃			脾				['杀虫','消积']
黑豆					平			甘												脾		肾		['益精','明目','养血','祛风','利水','解毒']
黑姜散		热							辛		肺		心				胃			脾		肾		['温中','散寒','回阳','通脉','温肺','化饮']
黑山栀	寒						苦				肺		心		三焦									['泻火','除烦','清热','利湿','凉血','解毒','消肿','止痛']
黑芝麻					平			甘						大肠							肝	肾		['补肝肾','益精血','润肠燥']
黑种草子			温					甘	辛															['补肾','健脑','通经','通乳','利尿']
红参			温				微苦	甘			肺		心							脾		肾		['大补','元气','复脉','固脱','益气','摄血']
红大戟	寒						苦				肺									脾		肾		['泻水','逐饮','解毒','消肿','散结']
红豆蔻			温						辛		肺									脾				['燥湿','散寒','醒脾','消食']
红粉		热							辛		肺									脾			大毒	['拔毒','除脓','去腐','生肌']
红花			温						辛				心								肝			['活血','通经','散瘀','止痛']
红景天					平		苦	甘			肺		心											['益气','活血','通脉','平喘']
红芪			温					甘			肺									脾				['补气','固表','利尿','托毒','排脓','敛疮','生肌']
红曲			温					甘						大肠						脾	肝			['活血','化瘀','健脾','消食']
红丝线	寒						苦		辛		肺													['清热','解毒','凉血','熄风','散瘀','消肿']
红糖			温					甘			肺						胃			脾	肝			['补中','缓肝','活血','化瘀']
红天葵				凉				甘																['清热','凉血','止咳','化痰','散瘀','消肿']
红药子	微寒						微苦							大肠			胃		膀胱	脾				['止血','活血','养血','止痢','收敛','止痛']
红鱼眼					平																		有毒	['祛风','活血','散瘀','消肿']
猴耳环	微寒						微苦										胃			脾	肝			['清热','解毒','去湿','敛疮']
厚朴			温				苦		辛		肺			大肠			胃			脾				['燥湿','消痰','下气','除满']
厚朴花			温				苦										胃			脾				['芳香','化湿','理气','宽中']
胡黄连	寒						苦							大肠			胃				肝			['退虚热','除疳热','清湿热']
胡椒		热							辛					大肠			胃						有毒	['温中','散寒','下气','消痰']
胡芦巴			温				苦															肾		['温肾','祛寒','止痛']
胡荽			温						辛		肺									脾	肝			['发表','透疹','消食','开胃','止痛','解毒']
胡桃肉			温					甘			肺			大肠								肾		['敛肺','定喘','补肾','强腰','润肠','通便']
胡颓子叶					平	酸					肺													['敛肺','平喘','止咳']
葫芦					平			甘			肺									脾		肾		['止渴','除烦','利水','消肿','通淋','散结']
葫芦茶				凉			苦				肺								膀胱		肝			['清热','解毒','利水','除湿','消食','杀虫']
湖北贝母				凉			微苦				肺		心											['清热','化痰','止咳','散结']
槲寄生					平		苦														肝	肾		['祛风湿','补肝肾','强筋骨','降血压','安胎','下乳']
虎耳草	寒						微苦				肺						胃							['祛风','清热','清血','解毒']
虎杖	微寒						微苦				肺							胆			肝			['祛风','利湿','散瘀','止痛','止咳','化痰']
琥珀					平			甘					心			小肠					肝			['镇惊','安神','散瘀','止血','利水','通淋','去翳','明目']
花粉	微寒						微苦	甘			肺						胃							['清热','泻火','生津','止渴','消肿','排脓']
花椒			温						辛								胃			脾		肾		['温中','止痛','杀虫','止痒']
花蕊石					平	酸															肝			['化瘀','止血']
华山参		热					微苦	甘			肺		心											['平喘','止咳','安神','镇惊']
滑石	寒							甘			肺						胃		膀胱					['利尿','通淋','清热','解暑']
化橘红			温				苦		辛		肺									脾				['散寒','燥湿','利气','消痰']
怀地黄	寒							甘					心								肝	肾		['清热','凉血','养阴','生津']
怀山药					平			甘			肺									脾		肾		['补脾','养胃','生津','益肺','补肾','涩精']
槐花	微寒						苦							大肠							肝			['凉血','止血','清肝','泻火']
槐角	寒						苦							大肠							肝			['清热','泻火','凉血','止血']
槐枝					平		苦						心								肝			['散瘀','止血','清热','燥湿','祛风','杀虫']
槐子	微寒						苦							大肠							肝			['凉血','止血','清肝','泻火']
黄柏	寒						苦												膀胱			肾		['清热','燥湿','泻火','除蒸','解毒','疗疮']
黄花倒水莲					平		微苦	甘												脾	肝	肾		['益气','养血','健脾','利湿','活血','调经']
黄荆子			温				苦		辛		肺						胃				肝			['祛风','解表','化痰','止咳','行气','止痛']
黄精					平			甘			肺									脾		肾		['补气','养阴','健脾','润肺','益肾']
黄连	寒						苦						心	大肠			胃	胆		脾	肝			['清热','燥湿','泻火','解毒']
黄莲	寒						苦						心				胃	胆		脾	肝			['清热','燥湿','泻火','解毒']
黄皮核			微温				苦		辛		肺						胃				肝			['理气','消食','散结','消胀','化痰','止咳']
黄芪			微温					甘			肺									脾				['补气','固表','利尿','托毒','排脓','生肌']
黄芩	寒						苦				肺			大肠		小肠		胆		脾				['清热','燥湿','泻火','解毒','止血','安胎']
黄蜀葵				凉				甘									胃		膀胱			肾		['利水','散瘀','消肿','解毒','通乳']
黄藤	寒						苦						心								肝			['清热','解毒','泻火','通便']
黄药子					平		苦						心								肝			['清热','凉血','解毒','消瘿']
回回蒜			微温						辛												肝			['消炎','退肿','平喘','截疟']
火麻仁					平			甘						大肠			胃			脾				['润燥','通便','补虚']
火炭母	微寒					微酸														脾	肝			['清热','利湿','凉血','解毒','明目','退翳']
火硝			温				苦			咸	肺		心							脾			小毒	['攻坚','破积','利水','泻下','解毒','消肿']
藿香			微温						辛		肺						胃			脾				['快气','和中','辟秽','祛湿']
藿香叶			温						辛		肺						胃			脾				['芳香','化湿','和中','止呕','发表','解暑']
鸡蛋花					平		微苦	甘			肺			大肠										['清利','湿热','清肠','止泻','止咳','化痰']
鸡骨草				凉			微苦	甘									胃				肝			['利湿','退黄','清热','解毒','疏肝','止痛']
鸡骨香			温				苦		辛															['理气','止痛','祛风','除湿','舒筋','活络']
鸡冠花				凉				甘						大肠							肝			['收敛','止血','止带','止痢']
鸡内金					平			甘								小肠	胃		膀胱	脾				['健胃','消食','涩精','止遗']
鸡矢藤					平		苦	甘			肺						胃			脾	肝			['祛风','活血','止痛','解毒','消食','导滞','除湿','消肿']
鸡血藤			温				苦	甘													肝	肾		['补血','活血','通络']
鸡眼草				凉			苦							大肠			胃							['清热','解毒','健脾','利湿']
鸡爪大黄	寒						苦					心包	心	大肠			胃			脾	肝			['泻热','通肠','凉血','解毒','逐瘀','通经']
积雪草	寒						苦		辛											脾	肝	肾		['清湿热','解毒','消肿','活血','利尿']
吉祥草				凉				甘			肺									脾	肝			['清肺','止咳','理血','补肾','解毒','接骨']
急性子			温				微苦		辛		肺										肝			['破血','软坚','消积']
蒺藜			微温				苦		辛												肝		有毒	['平肝','解郁','活血','祛风','明目','止痒']
寄生黄	寒						苦				肺						胃				肝			['行气','健胃','清热','利湿','凉血','止血','补肾','涩精']
檵木					平		苦							大肠			胃				肝			['收敛','止血','清热','解毒','止泻']
檵木叶				凉			苦							大肠			胃				肝			['清热','解毒','收敛','止血']
假芫茜			温				微苦		辛		肺			大肠			胃			脾				['疏风','解表','芳香','健胃']
剑花	微寒							甘			肺													['清热','润肺','化痰','止咳']
姜黄			温				苦		辛											脾	肝			['破血','行气','通经','止痛']
僵蚕					平				辛	咸	肺						胃				肝			['祛风','定惊','化痰','散结']
降香			温						辛				心							脾	肝			['行气','活血','止痛','止血']
椒目			温				苦		辛		肺								膀胱	脾				['利水','消肿','祛痰','平喘']
焦山楂			微温			酸		甘									胃			脾	肝			['消食','健胃','行气','散瘀','降脂','化浊']
绞股蓝	寒						苦				肺									脾		肾		['清热','解毒','止咳','祛痰']
芥子			温						辛		肺													['温肺','豁痰','利气','散结','通络','止痛']
金沸草			温				苦		辛	咸	肺			大肠										['降气','化痰','行水']
金刚刺					平		苦		辛		肺			大肠								肾		['祛风','除湿','活血','解毒','镇惊','息风']
金果榄	寒						苦				肺			大肠										['清热','解毒','利咽','目痛']
金莲花	微寒						苦				肺						胃							['清热','解毒','消肿','明目']
金礞石					平			甘		咸	肺		心								肝			['坠痰','下气','平肝','镇惊']
金钱白花蛇			温					甘		咸											肝			['祛风','通络','止痉']
金钱草	微寒							甘		咸								胆	膀胱		肝	肾		['清利','湿热','通淋','消肿','利湿','退黄']
金荞麦				凉					微辛		肺													['清热','解毒','排脓','祛瘀']
金丝草				凉				甘																['清热','解暑','利尿']
金铁锁			温				苦		辛												肝			['祛风','除湿','散瘀','止痛','解毒','消肿']
金银花	寒							甘			肺		心				胃							['清热','解毒','凉散','风热']
金樱根					平	酸								大肠					膀胱			肾		['固精','止带','固崩','止带','涩肠','止泻']
金樱子					平	酸		甘						大肠					膀胱			肾		['固精','缩尿','涩肠','止泻']
筋骨草	寒						苦				肺													['清热','解毒','凉血','消肿']
锦灯笼	寒						苦				肺													['清热','解毒','利咽','化痰','利尿']
京大戟	寒						苦				肺									脾		肾	有毒	['泻水','逐饮','消肿','散结']
荆芥			微温						辛		肺										肝			['发表','散风','透疹']
荆芥穗			微温						辛		肺										肝			['解表','散风','消疮','透疹']
荆芥炭			温、微温				苦				肺										肝			['收敛','止血']
粳米					平			甘									胃			脾				['健脾','和胃','补中','益气','除烦渴','止泻痢']
景天三七					平	微酸		甘					心								肝			['散瘀','止血','安神','镇痛']
九层塔			温						辛		肺			大肠			胃			脾				['疏风','解表','祛风','消肿','散瘀','止痛','活血','通经']
九里香			温				微苦		辛								胃				肝			['行气','止痛','活血','散瘀']
九龙藤			温				微苦	甘						大肠							肝			['祛风','除湿','行气','活血']
九香虫			温						辛	咸										脾	肝	肾		['行气','止痛','温肾','壮阳']
韭菜子			温					甘	辛												肝	肾		['温补','肝肾','壮阳','固精']
救必应	寒						苦				肺			大肠			胃				肝			['泻火','解毒','清热','利湿','行气','止痛','凉血','止血']
桔梗					平		苦		辛		肺													['宣肺','祛痰','利咽','排脓']
菊花	微寒						苦	甘			肺										肝			['散风','清热','平肝','明目']
菊苣				凉			微苦			咸														['清肝','利胆','健胃','消食','利尿','消肿']
橘核					平		苦														肝	肾		['理气','散结','止痛']
橘皮			温				苦		辛		肺									脾				['理气','健脾','燥湿','化痰']
卷柏					平				辛				心								肝			['活血','祛瘀','止血']
决明子	微寒						苦	甘						大肠							肝	肾		['清热','明目','润肠','通便']
榼藤子					平			微甘						大肠			胃				肝		有毒	['行气','止痛','利湿','消肿']
苦参	寒						苦						心	大肠			胃		膀胱		肝			['清热','燥湿','杀虫','利尿']
苦地胆	寒						苦		微辛		肺										肝	肾		['清热','解毒','利水','消肿']
苦地丁	寒						苦						心	大肠							肝			['清热','解毒','散结','消肿']
苦丁茶	寒						苦	甘			肺						胃				肝			['疏风','清热','除烦','止咳','消食','化痰']
苦豆子	寒						苦							大肠			胃						有毒	['清热','燥湿','止痛','杀虫']
苦瓜	寒						苦				肺		心							脾				['祛暑','涤热','明目','解毒']
苦楝皮	寒							甘									胃			脾	肝			['驱虫','疗癣']
苦木	寒						苦				肺			大肠										['清热','解毒','祛湿']
苦石莲	寒						苦						心							脾		肾		['散瘀','止痛','清热','去湿']
苦杏仁			微温				苦				肺			大肠										['降气','止咳','平喘','润肠','通便']
苦玄参	寒						苦				肺						胃				肝			['清热','解毒','消肿','止痛']
宽筋藤				凉			微苦														肝			['舒筋','活络','祛风','止痛']
款冬花			温				微苦		辛		肺													['润肺','下气','止咳','化痰']
昆布	寒									咸							胃				肝	肾		['软坚','散结','消痰','利水']
昆明山海棠			温				苦		辛											脾	肝	肾	大毒	['祛风湿','祛瘀','通络','续筋','接骨']
栝楼	寒						微苦	甘			肺			大肠			胃							['清热','涤痰','散结','宽胸','润燥','滑肠']
栝楼皮	寒							甘			肺						胃							['清热','化痰','利气','宽胸']
辣椒		热							辛				心							脾				['温中','散寒','开胃','消食']
辣蓼			温						辛					大肠			胃			脾				['除湿','化滞']
莱菔子					平			甘	辛		肺						胃			脾				['下气','祛痰','消食','化积']
蓝布正				凉			微苦	甘			肺									脾	肝			['益气','健脾','补血','养阴','润肺','化痰']
狼毒					平				辛											脾	肝			['散结','杀虫']
狼牙					平		苦						心								肝			['收敛','止血','截疟','止痢','解毒','补虚']
榔榆皮	寒						苦														肝	肾		['清热','解毒','利水','消肿']
老鹳草					平		苦		辛											脾	肝	肾		['祛风湿','通经络','止泻痢']
了哥王	寒						苦		辛		肺						胃						有毒	['清热','解毒','散结','逐瘀','利水','杀虫']
雷公根					平		苦		辛		肺		心	大肠						脾		肾		['明目','生津','祛风','止痢','利湿','消肿','清热','解毒','活血','止血']
雷公藤				凉			苦		辛				心								肝		大毒	['祛风','除湿','活血','通络','消肿','止痛','杀虫','消炎','解毒']
雷丸	寒						微苦							大肠			胃							['杀虫','消积']
梨皮				凉				甘			肺		心	大肠								肾		['清心','润肺','降火','生津']
藜					平			甘																['清热','利湿','杀虫']
藜芦	寒						苦		辛		肺						胃				肝			['涌吐','风痰','杀虫','疗疮']
荔枝核			温				微苦	甘													肝	肾		['行气','散结','祛寒','止痛']
连钱草	微寒						微苦		辛										膀胱		肝	肾		['利湿','通淋','清热','解毒','散瘀','消肿']
连翘	微寒						苦				肺		心			小肠								['清热','解毒','消肿','散结']
连翘心	寒						苦						心											['清心','开窍']
莲房			温				苦														肝			['化瘀','止血']
莲须					平			甘					心									肾		['固肾','涩精']
莲子					平			甘					心							脾		肾		['补脾','止泻','益肾','固精','养心','安神']
莲子心	寒						苦						心									肾		['清心','安神','交通','心肾','涩精','止血']
凉粉草	寒							甘																['消暑','解渴','清热','解毒']
两面针					平		苦		辛								胃				肝		有毒	['行气','止痛','活血','化瘀','祛风','通络']
两头尖		热							辛											脾				['祛风湿','消痈肿']
蓼大青叶	寒						苦						心				胃							['清热','解毒','凉血','消斑']
灵香草					平			甘	辛		肺													['清热','行气','止痛','驱蛔']
灵芝					平			甘			肺		心								肝	肾		['补气','安神','止咳','平喘']
凌霄花	寒					酸		甘				心包									肝			['行气','祛瘀','凉血','祛风']
羚羊角	寒									咸			心								肝			['平肝','息风','清肝','明目','散血','解毒']
刘寄奴			温				微苦		辛				心							脾	肝			['活血','通经','消积','止痛']
硫黄			温			酸								大肠								肾		['解毒','杀虫','疗疮','助阳','通便']
柳枝	寒						苦										胃				肝			['祛风','利湿','解毒','消肿']
六棱菊			微温				苦		辛		肺								膀胱	脾				['祛风','除湿','活血','解毒']
六神曲			温					甘	辛								胃			脾				['消食','化积','健脾','和胃']
六月寒					平		微苦		辛		肺													['疏风','解表','宣肺','止咳']
龙齿				凉				甘					心								肝			['镇静','安神','清热','除烦']
龙胆	寒						苦											胆			肝			['清肝火','除湿热','健胃']
龙胆草	寒						苦											胆			肝			['清热','燥湿','泻火']
龙骨					平			甘					心	大肠							肝	肾		['镇心','安神','平肝','潜阳','固涩','收敛']
龙葵	寒						苦												膀胱				有毒	['清热','解毒','利水','消肿','凉血','止血']
龙脷叶					平			甘			肺						胃							['润肺','止咳','通便']
龙涎香			温			酸		甘			肺		心								肝	肾		['行气','活血','止咳','化痰','消积','利水']
龙眼肉			温					甘					心							脾				['补益','心脾','养血','安神']
蝼蛄	寒									咸				大肠		小肠			膀胱					['利水','消肿','通淋']
漏芦	寒						苦										胃							['清热','解毒','排脓','通乳']
芦根	寒							甘			肺						胃							['清热','生津','除烦','止呕','利尿']
芦荟	寒						苦							大肠			胃				肝			['清肝热','通便','杀虫','疗疳']
炉甘石					平			甘												脾	肝			['解毒','明目','退翳','收湿','止痒','敛疮']
陆英					平		微苦	甘													肝			['祛风','利湿','舒筋','活血']
鹿角胶			温					甘		咸											肝	肾		['补肾','益肝','养血','益精']
鹿茸			温					甘		咸											肝	肾		['壮肾阳','益精血','强筋骨','调冲任','托疮毒']
鹿衔草			温				苦	甘													肝	肾		['祛风湿','强筋骨','止血','止咳']
鹿药			温				苦	甘													肝	肾		['补肾','壮阳','活血','祛瘀','祛风','止痛']
路路通					平		苦														肝	肾		['祛风','活络','利水','通经']
罗布麻叶				凉			苦	甘													肝			['平肝','安神','清热','利水']
罗汉果				凉				甘			肺			大肠										['清热','润肺','滑肠','通便']
罗勒			温						辛														有毒	['疏风','行气','化湿','消食','活血','解毒']
萝卜					平			甘	辛		肺						胃			脾				['消食','除胀','降气','化痰']
萝芙木	寒						苦																有毒	['清风热','降肝火','消肿毒']
络石藤	微寒						苦						心								肝	肾		['祛风','通络','凉血','消肿']
落地生根	寒					微酸					肺											肾		['解毒','消肿','活血','止痛','拔毒','生肌']
绿豆	寒							甘					心				胃				肝			['清热','消暑','利水','解毒']
绿萼梅					平	微酸					肺						胃				肝			['疏肝','解郁','和中','化痰']
葎草	寒						苦	甘			肺											肾		['清热','解毒','利尿','通淋']
麻黄			温				微苦		辛		肺								膀胱					['发汗','散寒','宣肺','平喘','利水','消肿']
麻黄根					平			甘			肺		心											['固表','止汗']
麻仁					平			甘						大肠			胃			脾				['润燥','通便','补虚']
麻油				凉				甘						大肠										['润肠','通便','解毒','生肌']
马宝				凉				甘		咸			心								肝		有毒	['镇惊','化痰','清热','解毒']
马鞭草				凉			苦													脾	肝			['活血','散瘀','截疟','解毒','利水','消肿']
马勃					平				辛		肺													['清肺','利咽','止血']
马齿苋	寒					酸								大肠							肝			['清热','解毒','凉血','止血']
马兜铃	微寒						苦				肺			大肠										['清肺','降气','止咳','平喘','清肠','消痔']
马兰				凉					辛		肺			大肠			胃				肝			['凉血','止血','清热','利湿','解毒','消肿']
马蔺子					平			甘			肺						胃			脾	肝			['清热','利湿','消肿','解毒','止血']
马钱子			温				苦													脾	肝		有毒	['清肺','利咽','止血']
马桑根				凉		酸	苦																	['祛风','除湿','解毒','散结','杀虫']
马蹄金				凉			苦		辛															['清热','利湿','解毒','消肿']
马尾连	寒						苦				肺		心	大肠				胆			肝			['清热','燥湿','泻火','解毒']
麦冬	微寒						微苦	甘			肺		心				胃							['养阴','生津','润肺','清心']
麦门冬	微寒						微苦	甘					心				胃			脾				['养阴','生津','润肺','清心']
麦芽					平			甘									胃			脾				['行气','消食','健脾','开胃','退乳','消胀']
满山红			温				苦		辛		肺													['止咳','祛痰']
蔓荆子	微寒						苦		辛								胃		膀胱		肝			['疏散','风热','清利','头目']
芒硝	寒						苦			咸				大肠			胃							['泻热','通便','润燥','软坚','清火','消肿']
猫爪草			温					甘	辛		肺										肝			['散结','解毒','消肿']
毛草龙				凉			微苦																	['清热','利湿','消肿','解毒']
毛诃子					平			甘																['清热','解毒','收敛','养血','调和','诸药']
没药					平		苦		辛				心							脾	肝			['散瘀','定痛','消肿','生肌']
玫瑰花			温				微苦	甘												脾	肝			['行气','解郁','和血','止痛']
梅花					平	微酸					肺						胃				肝			['开郁','和中','化痰','解毒']
虻虫				凉			苦														肝			['逐瘀','消癥','破血','通经']
礞石					平					咸	肺										肝			['坠痰','下气','平肝','镇惊']
猕猴桃	寒					酸		甘									胃				肝	肾		['解热','止渴','健胃','通淋']
密蒙花	微寒							甘													肝			['清热','养肝','泻火','明目','退翳']
密陀僧					平				辛	咸										脾	肝		有毒	['杀虫','收敛','祛痰','镇惊']
绵萆薢					平		苦										胃					肾		['利湿浊','祛风','通痹']
绵马贯众	微寒						苦										胃				肝			['驱虫','止血','清热','解毒']
明党参	微寒						微苦	甘			肺									脾	肝			['润肺','化痰','养阴','和胃','平肝','解毒']
明矾	寒					酸					肺						胃			脾				['祛痰','燥湿','止血','止泻','杀虫','止痒']
茉莉花			温					微甘	辛								胃			脾	肝			['理气','止痛','辟秽','开郁']
墨旱莲	寒					酸		甘													肝	肾		['滋补','肝肾','凉血','止血']
母丁香			温						辛		肺						胃			脾		肾		['温中','降逆','散寒','止痛']
牡丹皮	微寒						苦		辛				心								肝	肾		['清热','凉血','活血','化瘀']
牡蒿				凉			苦	微甘																['清热','凉血','解毒']
牡荆叶					平		微苦		辛		肺													['解表','祛痰','止咳','平喘']
牡蛎	微寒									咸								胆			肝	肾		['重镇','安神','潜阳','补阴','软坚','散结']
木鳖子				凉			苦	微甘									胃			脾	肝			['散结','消肿','攻毒','疗疮']
木耳					平			甘			肺			大肠						脾	肝			['补气','养血','润肺','止咳','止血','降压','抗癌']
木防己	寒						苦		辛										膀胱	脾		肾		['祛风','除湿','通经','活络','解毒','消肿']
木芙蓉叶				凉			苦		微辛		肺										肝			['清热','解毒','凉血','止血','消肿','止痛']
木瓜			温			酸														脾	肝			['平肝','舒筋','和胃','化湿']
木蝴蝶				凉			苦	甘			肺						胃				肝			['清肺','利咽','疏肝','和胃']
木槿花				凉			苦	甘			肺									脾	肝			['清热','利湿','凉血','解毒']
木槿皮	微寒						苦	甘						大肠						脾	肝			['清热','利湿','杀虫','止痒']
木棉花				凉				甘						大肠										['清热','利湿','解毒','止血']
木通	寒						苦						心			小肠			膀胱					['清心火','利小便','通经','下乳']
木香			温				苦		辛					大肠	三焦		胃	胆		脾				['行气','止痛','健脾','消食']
木贼					平		苦	甘			肺										肝			['疏风','散热','退翳','止血']
南板蓝根	寒						苦						心				胃							['清热','解毒','凉血','消肿']
南瓜子					平			甘						大肠										['杀虫','下乳','利水','消肿']
南鹤虱					平		微苦		辛								胃			脾				['驱虫']
南沙参	微寒							甘			肺						胃							['养阴','清肺','益胃','生津','化痰','益气']
南山楂			微温			酸		甘									胃			脾	肝			['消积','化滞','破气','散瘀']
南天竹叶	寒						苦																	['清热','利湿','泻火','解毒']
南五味子			温			酸		甘			肺		心									肾		['收敛','固涩','益气','生津','补肾','宁心']
南星			温				苦		辛		肺									脾	肝		有毒	['化痰','燥湿','祛风','止痉','散结','消肿']
硇砂			温				苦		辛	咸							胃			脾	肝			['消积','软坚','化腐','生肌']
闹羊花			温						辛												肝			['祛风','除湿','散瘀','定痛']
牛蒡子	寒						苦		辛		肺						胃							['疏散','风热','宣肺','透疹','消肿','解毒']
牛大力					平			甘			肺									脾		肾		['补脾','润肺','舒筋','活络']
牛耳枫				凉				甘	辛												肝	肾	有毒	['清热','解毒','祛风','活血','止痛','消肿']
牛黄				凉				甘					心								肝			['清心','豁痰','开窍','凉肝','息风','解毒']
牛膝					平	酸	苦														肝	肾		['补肝肾','强筋骨','逐瘀','通经','引血','下行']
牛至				凉			微苦		辛		肺						胃				肝			['解表','理气','清暑','利湿']
扭肚藤				凉			微苦							大肠			胃							['清热','解毒','利湿','消滞']
糯稻根					平			甘			肺											肾		['养阴','除热','止汗']
糯稻根须					平			甘					心								肝			['固表','止汗','益胃','生津','退虚热']
糯米根须					平			甘			肺						胃					肾		['固表','止汗','益胃','生津','退虚热']
女贞子				凉			苦	甘													肝	肾		['滋补','肝肾','明目','乌发']
藕节					平			甘			肺						胃				肝			['收敛','止血','化瘀']
爬山虎			温						辛															['祛风','止痛','活血','通络']
盘龙参					平		苦	甘			肺		心											['益气','养阴','清热','解毒']
盘龙七					平		微苦				肺								膀胱	脾	肝			['补脾','健胃','收涩','固肠','除湿','利水','活血']
胖大海	寒							甘			肺			大肠										['清热','润肺','利咽','解毒','润肠','通便']
炮姜			温				苦													脾	肝			['温经','止血','温中','止痛']
佩兰					平				辛		肺						胃			脾				['芳香','化湿','醒脾','开胃','发表','解暑']
硼砂				凉				甘		咸	肺						胃							['清热','消痰','解毒','防腐']
砒石		大热							辛		肺										肝		大毒	['攻毒','杀虫','蚀疮','去腐','截痰','平喘','截疟']
枇杷叶	微寒						苦				肺						胃							['清肺','止咳','降逆','止呕']
啤酒花				微凉			苦										胃				肝		有毒	['健胃','消食','利尿','安神']
辟汗草				凉			苦		辛								胃			脾	肝			['和中','健胃','解暑','化湿']
篇蓄	微寒						苦												膀胱					['利尿','通淋','杀虫','止痒']
片姜黄			温				苦		辛											脾	肝			['破血','行气','通经','止痛']
平贝母	微寒						苦	甘			肺		心											['清热','润肺','化痰','止咳']
蒲公英	寒						苦	甘									胃				肝			['清热','解毒','利尿','散结']
蒲黄					平			甘				心包									肝			['止血','化瘀','通淋']
蒲黄炭					平			甘				心包									肝			['止血','化瘀','利尿','通淋']
七叶莲			温				微苦		辛														有毒	['祛风','止痛','活血','消肿']
七叶一枝花	微寒						苦														肝		有毒	['清热','解毒','消肿','止痛','凉肝','定惊']
荠菜				凉				甘											膀胱	脾	肝			['凉肝','止血','平肝','明目','清热','利湿']
荠苨	寒							甘			肺									脾				['润燥','化痰','清热','解毒']
蕲蛇			温					甘		咸											肝		有毒	['祛风','通络','止痉']
千斤拔					平			甘													肝	肾		['祛风','除湿','强筋','壮骨','活血','解毒']
千金子			温						辛					大肠							肝	肾		['逐水','消肿','破血','消癥']
千里光	寒						苦				肺										肝			['清热','解毒','凉血','消肿','清肝','明目','杀虫','止痛']
千年健			温				苦		辛												肝	肾		['祛风湿','健筋骨']
千日红					平			甘			肺										肝			['化痰','止咳','平喘','清肝明目经止惊']
牵牛子	寒						苦				肺			大肠								肾		['泻水','通便','消痰','涤饮','杀虫','攻积']
铅丹	微寒								辛				心								肝		有毒	['拔毒','生肌','杀虫','止痒']
前胡	微寒						苦		辛		肺													['发表','镇痛','降气','化痰']
芡实					平			甘												脾		肾		['益肾','固精','补脾','止泻','除湿','止带']
茜草	寒						苦														肝			['凉血','止血','祛瘀','通经']
羌活			温				苦		辛										膀胱			肾		['解表','散寒','祛风','除湿','止痛']
秦艽					平		苦		辛								胃	胆			肝			['祛风湿','退虚热','舒筋','止疼']
秦皮	寒						苦							大肠				胆			肝			['清热','燥湿','收涩','明目']
青黛	寒									咸											肝			['清热','凉血','定惊']
青风藤					平		苦		辛											脾	肝			['祛风湿','通经络','利小便']
青果					平	酸		甘			肺						胃							['清热','利咽','生津','解毒']
青蒿	寒						苦		辛									胆			肝			['清热','解毒','除骨蒸','截疟']
青礞石					平			甘		咸	肺		心								肝			['坠痰','下气','平肝','镇惊']
青木香	寒						苦		辛		肺						胃				肝			['行气','止痛','解毒','消肿','平肝','降压']
青牛胆	寒						苦																	['清热','解毒','利咽','止痛']
青皮			温				苦		辛								胃	胆			肝			['疏肝','破气','消积','化滞']
青天葵				凉				甘			肺		心								肝			['润肺','止咳','清热','解毒']
青葙子	微寒						苦														肝			['清肝','明日','退翳']
青羊参			温					甘	辛				心							脾	肝			['祛风湿','强筋骨','健脾胃']
青叶胆	寒						苦	甘										胆	膀胱		肝			['清肝','利胆','清热','利湿']
轻粉	寒								辛					大肠		小肠							有毒	['攻毒','杀虫','敛疮','逐水','通便']
苘麻子				凉			苦							大肠		小肠								['清热','解毒','利水','消肿','通乳','退翳']
瞿麦	寒						苦						心			小肠								['利尿','通淋','破血','通经']
全蝎					平				辛												肝		有毒	['息风','镇痉','攻毒','散结','通络','止痛']
拳参	微寒						苦				肺			大肠							肝			['清热','解毒','止血','消肿']
人参			温				微苦	甘			肺		心							脾		肾		['大补','元气','复脉','固脱','补脾','益肺','生津','安神']
人参叶	寒						苦	甘			肺						胃							['补气','益肺','祛暑','生津']
忍冬藤	寒							甘			肺						胃							['清热','解毒','疏风','通络']
日草根				凉				甘																['清热','利尿','消肿']
榕树叶	微寒						微苦				肺			大肠										['清热','祛湿','止咳','化痰','活血','散瘀','祛风','止痒']
肉苁蓉			温					甘		咸				大肠								肾		['补肾阳','益精血','润肠','通便']
肉豆寇			温						辛					大肠			胃			脾				['涩肠','止泻','温中','行气']
肉豆蔻			温						辛					大肠			胃			脾			有毒	['温中','行气','涩肠','止泻']
肉桂		大热						甘	辛				心							脾	肝	肾		['补火','助阳','引火','归元','散寒','止痛','温通','经脉']
乳香			温				苦		辛				心							脾	肝			['调气','活血','定痛','消肿','生肌']
蕤仁	微寒							甘													肝			['养肝','明目','疏风','散热']
三白草	寒							甘	辛		肺								膀胱					['清热','解毒','利尿','消肿']
三分三			温				苦		辛														大毒	['解痉','镇痛','祛风','除湿']
三棵针	寒						苦							大肠			胃				肝		有毒	['清热','燥湿','泻火','解毒']
三棱					平		苦		辛											脾	肝			['破血','行气','消积','止痛']
三七			温				微苦	甘									胃				肝			['散瘀','止血','消肿','定痛']
三丫苦	寒						苦				肺						胃				肝			['清热','解毒','行气','止痛','燥湿','止痒']
桑白皮	寒							甘			肺													['泻肺','平喘','利水','消肿']
桑寄生					平		苦	甘													肝	肾		['补肝肾','强筋骨','祛风湿','安胎元']
桑螵蛸					平			甘		咸											肝	肾		['益肾','固精','缩尿','止浊']
桑椹	寒					酸		甘					心								肝	肾		['补血','滋阴','生津','润燥']
桑叶	寒						苦	甘			肺										肝			['疏散','风热','清肺','润燥','清肝','明目']
桑枝					平		苦														肝			['祛风湿','通经络','行水气']
沙棘			温			酸					肺		心				胃			脾				['祛痰','止咳','消食','化滞','活血','散瘀']
沙苑子			温					甘													肝	肾		['温补','肝肾','固精','缩尿','明目']
砂仁			温						辛								胃			脾		肾		['化湿','开胃','温脾','止泻','理气','安胎']
山慈菇				凉				甘	微辛											脾	肝			['清热','解毒','化痰','散结']
山大颜				凉			苦																	['清热','解毒','消肿','拔毒']
山豆根	寒						苦				肺						胃						有毒	['清热','解毒','消肿','利咽']
山海螺					平			甘	辛		肺									脾				['益气','养阴','解毒','消肿','排脓','通乳']
山甲	微寒									咸							胃				肝			['活血','消癥','通经','下乳','搜风','通络','消肿','排脓']
山菅兰			温						辛															['拔毒','消肿','散瘀','止痛']
山麦冬	微寒						微苦	甘			肺		心				胃							['养阴','润肺','益胃','生津','清心','除烦']
山木通					平		苦		辛								胃			脾	肝			['祛风','活血','利尿','通淋']
山柰			温						辛				心				胃							['行气','温中','消食','止痛']
山稔根					平		苦		辛											脾	肝			['解毒','利湿','活血','调经']
山药					平			甘			肺									脾		肾		['补脾','养胃','生津','益肺','补肾','涩精']
山银花	寒							甘			肺		心				胃							['清热','解毒','凉散','风热']
山萸肉			微温			酸															肝	肾		['补益','肝肾','涩精','固脱']
山楂			微温			酸		甘									胃			脾	肝			['消食','健脾','行气','消瘀']
山楂叶					平	酸															肝			['活血','化瘀','理气','通脉','化浊','降脂']
山芝麻	寒						苦				肺			大肠										['清热','解毒','止咳']
山栀仁	寒						苦				肺		心		三焦									['泻火','除烦','清热','利湿','凉血','解毒','消肿','止痛']
山茱萸			微温			酸															肝	肾		['补益','肝肾','收涩','固脱']
商陆	寒						苦				肺			大肠						脾		肾	有毒	['逐水','消肿','通利','二便','解毒','散结']
芍药	微寒					酸	苦													脾	肝			['养血','调经','敛阴','止汗','柔肝','止痛','平抑肝阳']
蛇床子			温				苦		辛													肾		['温肾','壮阳','燥湿','祛风','杀虫']
蛇莓	寒						苦	甘			肺			大肠							肝			['清热','凉血','消肿','解毒']
蛇蜕					平			甘		咸											肝			['祛风','定惊','解毒','退翳']
射干	寒						苦				肺													['清热','解毒','消痰','利咽']
麝香			温						辛				心							脾				['开窍','醒神','活血','通经','消肿','止痛']
伸筋草			温				苦		微辛															['祛风寒','除湿','消肿','舒筋','活络']
神曲			温					甘	辛								胃			脾				['消食','和胃']
肾茶				凉			微苦												膀胱			肾		['清热','祛湿','排石','利水']
升麻	微寒							微甘	辛		肺			大肠			胃			脾				['发表','透疹','清热','解毒','升举','阳气']
升药		热							辛		肺									脾			大毒	['拔毒','去腐']
生地黄	寒							甘					心								肝	肾		['清热','凉血','养阴','生津']
生龟甲	微寒							甘		咸			心								肝	肾		['滋阴','潜阳','益肾','强骨','养血','补心','固经','止崩']
生姜			微温						辛		肺						胃			脾				['散寒','解表','降逆','止呕','化痰','止咳','解鱼','蟹毒']
生姜皮				凉					辛		肺									脾				['行水','消肿']
生龙骨					平			甘					心								肝	肾		['镇惊','安神','平肝','潜阳','收敛','固涩']
生牡蛎	微寒									咸								胆			肝	肾		['潜阳','补阴','重镇','安神','软坚','散结','收敛','固涩','制酸','止痛']
生石膏	大寒							甘	辛		肺						胃							['清热','泻火','除烦','止渴']
生首乌			温、微温				苦	甘					心								肝	肾		['解毒','消痈','截疟','润肠','通便']
生铁落				凉					辛				心								肝			['平肝','镇惊']
生苡仁				凉				甘			肺						胃			脾				['利水','渗湿','健脾','止泻','除痹','排脓','解毒','散结']
蓍草					平	酸	苦				肺								膀胱	脾				['清热','解毒','活血','通经']
十萼茄				凉																				['清热','解毒','祛痰','止咳','补虚']
石蝉草				凉			微苦				肺									脾	肝	肾		['清热','解毒','消肿','散瘀','止痛','利水']
石菖蒲			微温				苦		辛				心				胃							['开窍','豁痰','理气','活血','散风','去湿']
石吊兰			温				苦				肺													['化痰','止咳','软坚','散结']
石膏	大寒							甘	辛		肺						胃							['清热','降火','除烦','止渴']
石斛	微寒							甘									胃					肾		['益胃','生津','滋阴','清热']
石黄			温						辛					大肠							肝		有毒	['解毒','杀虫','燥湿','祛痰','截疟']
石见穿					平		微苦													脾	肝			['清热','解毒','活血','镇痛']
石决明	寒									咸											肝			['平肝','潜阳','清肝','明目']
石榴皮			温			酸								大肠										['涩肠','止泻','止血','驱虫']
石南藤			温						辛											脾	肝			['消肿','止痛','驱风寒','通经络']
石楠叶					平		苦		辛												肝	肾		['祛风湿','止痒','强筋骨','益肝肾']
石上柏				凉			微苦	甘			肺						胃				肝			['疏风','清肺','止咳','解毒','止痛','清肿','抗癌','利湿']
石蒜			温				苦		辛														有毒	['消肿','杀虫']
石韦	微寒						苦	甘			肺								膀胱					['利尿','通淋','清热','止血']
石苇	微寒						苦	甘			肺								膀胱					['利尿','通淋','清肺','止咳','凉血','止血']
使君子			温					甘									胃			脾				['杀虫','消积']
柿蒂					平		苦										胃							['降逆','止呃','下气']
首乌藤					平			甘					心								肝			['养血','安神','祛风','通络']
熟地黄			微温					甘													肝	肾		['补血','滋阴','益精','填髓']
蜀椒			温						辛				心							脾		肾	有毒	['温中','止痛','杀虫','止痒']
蜀羊泉	寒						苦				肺										肝			['清热','解毒']
鼠李					平		微苦	甘													肝	肾		['止咳','祛痰']
鼠曲草					平			甘			肺													['祛痰','止咳','平喘','祛风湿']
双参			温				苦						心							脾	肝	肾		['益肾','活血','调经']
水半夏			温						辛		肺									脾			有毒	['燥湿','化痰','止咳','消肿']
水朝阳			微温				苦			咸													有毒	['祛风','明目','化痰','软坚','利水']
水飞蓟	寒						苦											胆			肝			['清热','解毒','保肝','利胆','保脑']
水河剑	寒						微苦																	['凉血','止血','利尿','通淋']
水红花子	微寒									咸							胃				肝			['消瘀','破积','健脾','利湿','全身','止痛']
水茴香			温					甘	辛		肺						胃			脾				['健脾','利湿','理气','化痰']
水牛角	寒						苦						心								肝			['清热','解毒','凉血','定惊']
水翁花	寒						苦				肺						胃			脾				['清热','解暑','生津','止渴','去湿','消滞']
水蛭					平		苦			咸											肝		有毒	['破血','逐瘀','通经']
丝瓜络					平			甘			肺						胃				肝			['活血','通络','祛风']
丝瓜藤	微寒						苦						心							脾		肾		['舒筋','活血','止咳','化痰','解毒','杀虫']
四季青				凉			苦				肺			大肠					膀胱					['清热','解毒','消肿','祛瘀']
四块瓦			温						辛		肺										肝		有毒	['祛风','除湿','散瘀','止痛','解毒','消肿']
四叶参			温					甘			肺									脾				['补血','通乳','清热','解毒','消肿','排脓']
松花粉			温					甘												脾	肝			['燥湿','收敛','止血']
松节			温				苦		辛												肝	肾		['祛风湿','通络','止痛']
松香			温				苦	甘												脾	肝			['祛风','燥湿','排脓','拔毒','生肌','止痛']
松子仁			温					甘			肺			大肠							肝			['润肠','通便','润肺','止咳']
苏合香			温						辛				心							脾				['开窍','辟秽','止痛']
苏木					平			甘		咸			心							脾	肝			['行血','祛瘀','消肿','止痛']
苏叶			温						辛		肺						胃							['解表','散寒','行气','和胃']
苏子			温						辛		肺									脾				['降气','平喘','消痰','润肠']
酸枣仁					平	酸		甘					心					胆			肝			['补肝','宁心','敛汗','生津']
娑罗子			温					甘									胃				肝			['理气','宽中','和胃','止痛']
锁阳			温					甘						大肠						脾		肾		['补肾阳','益精血','润肠','通便']
太白参			温				微苦	甘												脾		肾		['滋阴','补肾','益气','健脾']
太白米			微温				苦		辛		肺			大肠			胃			脾				['宽胸','利气','健胃','止呕','镇痛','止咳']
太子参					平		微苦	甘			肺									脾				['益气','健脾','生津','润肺']
檀香			温						辛		肺		心				胃			脾				['行气','温中','开胃','止痛']
桃胶					平		苦							大肠					膀胱					['活血','化瘀','止痢','通淋','止痛']
桃仁					平		苦	甘					心	大肠							肝			['活血','祛痰','润肠','通便']
天冬	寒						苦	甘			肺											肾		['养阴','润燥','润肺','生津']
天胡荽	寒						苦		辛									胆		脾		肾		['清热','利尿','解毒','消肿']
天花粉	微寒						微苦	甘			肺						胃							['清热','生津','消肿','排脓']
天葵子	寒						苦	甘									胃				肝			['清热','解毒','消肿','散结']
天麻					平			甘													肝			['平肝','息风','止痉']
天南星			温				苦		辛		肺									脾	肝		有毒	['燥湿','化痰','祛风','解痉','散结','消肿']
天山雪莲			温				微苦																	['温肾','助阳','祛风','胜湿','通经','活血']
天仙藤			温				苦													脾	肝	肾		['行气','活血','利水','消肿']
天仙子			温				苦		辛				心				胃				肝			['解痉','止痛','安神','定喘']
天竺黄	寒							甘					心								肝			['清热','豁痰','凉心','定惊']
甜茶				凉				甘											膀胱		肝	肾		['截疟','利尿','降压']
甜地丁	寒						苦	甘					心								肝			['清热','解毒','凉血','消肿']
甜瓜蒂	寒						苦										胃			脾	肝			['涌吐','痰食','除湿','退黄']
甜瓜子	寒							甘			肺			大肠			胃							['清肺','润肠','化瘀','排脓','疗伤','止痛']
铁包金					平			甘			肺		心											['理肺','止咳','祛瘀','止痛','舒肝','退黄','健胃','消积']
铁皮石斛	微寒							甘									胃					肾		['益胃','生津','滋阴','清热']
葶苈子	大寒						苦		辛		肺								膀胱					['泻肺','平喘','行气','消肿']
通草	微寒							甘			肺						胃							['清热','利尿','通气','下乳']
透骨草			温						辛												肝	肾		['祛风','除湿','舒筋','活血','散瘀','消肿','解毒','止痛']
透骨香			温						辛		肺										肝	肾		['祛风','除湿','散寒','止痛','化痰','止咳']
土贝母	微寒						苦				肺									脾				['散结','消肿','解毒']
土鳖虫	寒									咸											肝		有毒	['破瘀血','续筋骨']
土大黄				凉			苦		辛															['清热','解毒','止血','祛瘀','通便','杀虫']
土党参					平			甘			肺									脾				['健脾','益气','补肺','止咳','下乳']
土茯苓					平			甘									胃				肝			['解毒','利尿','通利','关节']
土荆芥			微温				苦		辛		肺								膀胱					['祛风','除湿','杀虫','止痒','活血','消肿']
土荆皮			温						辛		肺									脾				['杀虫','止痒']
土木香			温				苦		辛											脾	肝			['健脾','和胃','调气','解郁','止痛','安胎']
土牛膝	微寒					酸	苦														肝	肾		['活血','化瘀','利尿','通淋','清热','解表']
土人参					平			甘			肺									脾				['补气','润肺','止咳','调经']
土三七			温				苦	甘																['破血','散瘀','止血','消肿']
兔儿伞			微温						辛															['活血','舒筋','祛风湿']
菟丝子					平			甘	辛											脾	肝	肾		['补肾','益精','养肝','明日']
瓦楞子					平					咸	肺						胃				肝			['消痰','化瘀','软坚','散结','制酸','止痛']
瓦松				凉		酸	苦				肺									脾	肝			['凉血','止血','解毒','敛疮']
王不留行					平		苦										胃				肝			['活血','通经','下乳','利尿','通淋']
望江南	微寒						苦	甘		咸				大肠							肝			['清肝','明目','润肠','通便']
威灵仙			温						辛	咸									膀胱					['祛风','除湿','通络','止痛']
苇根	寒							甘			肺						胃							['清热','泻火','生津','止呕','止渴','除烦','利尿']
苇茎	寒							甘			肺		心											['清肺','生津']
委陵菜	寒						苦				肺			大肠							肝			['清热','解毒','凉血','止血']
问荆					平		苦				肺						胃				肝			['清热','凉血','止咳','利尿']
乌蔹莓	寒					酸	苦						心				胃				肝			['清热','解毒','利湿','消肿']
乌梅					平	酸					肺			大肠						脾	肝			['敛肺','涩肠','生津','安蛔']
乌梢蛇					平			甘													肝			['祛风','通络','止痉']
乌药			温						辛		肺								膀胱	脾		肾		['顺气','开郁','散寒','止痛']
巫山淫羊藿			温					甘	辛												肝	肾		['补肾阳','强筋骨','祛风湿']
无根藤				凉																				['清热','利湿','凉血','解毒']
无花果					平			甘			肺			大肠			胃							['健胃','清肠','消肿','解毒']
无患子				凉			苦		微辛		肺		心										有毒	['清肺','祛痰','利咽','行气','杀虫']
芜荑			温				苦		辛								胃			脾				['杀虫','消积']
吴茱萸		热					苦		辛								胃			脾	肝	肾	有毒	['散寒','止痛','降逆','止呕','助阳','止泻']
梧桐子					平			甘			肺		心									肾		['行气','健脾','消食','和中','止血']
蜈蚣			温						辛												肝			['息风','镇痉','攻毒','散结','通络','止痛']
五倍子	寒					酸					肺			大肠								肾		['敛肺','降火','涩肠','止泻','敛肺','止血','收湿','敛疮']
五加皮			温				苦		辛												肝	肾		['祛风湿','补肝肾','强筋骨']
五灵脂			温					甘		咸											肝			['活血','止痛','化瘀','止血','消积','解毒']
五味子			温			酸		甘			肺		心									肾		['收敛','固涩','益气','生津','补肾','宁心']
五指毛桃			微温					甘			肺			大肠			胃			脾	肝			['益气','健脾','祛痰','平喘','行气','化湿','舒筋','活络']
西党参					平			甘			肺									脾				['健脾','益肺','养血','生津']
西番莲			温				苦				肺													['祛风','除湿','活血','止痛']
西瓜翠衣				凉				甘					心				胃		膀胱					['清热','解暑','利尿']
西瓜皮				凉				甘					心				胃		膀胱					['清热','解渴','利尿']
西河柳					平			甘	辛		肺		心				胃							['散风','解表','透疹']
西红花					平			甘					心								肝			['活血','化瘀','凉血','解毒','解郁','安神']
西青果					平		苦	微甘			肺			大肠										['清热','生津','利咽','解毒']
西洋参				凉			微苦	甘			肺		心									肾		['补气','养阴','清热','生津']
菥蓂	微寒								辛					大肠			胃				肝			['清肝','明目','和中','利湿','解毒','消肿']
犀角	寒						苦														肝			['清热','凉血','解毒','定惊']
犀角尖	寒						苦						心								肝			['清热','凉血','解毒','定惊']
溪黄草	寒						苦							大肠				胆			肝			['清热','利湿','凉血','散瘀']
豨莶草	寒						苦		辛												肝	肾		['祛风湿','利关节','解毒']
喜树果	寒						苦										胃			脾	肝			['抗癌','散结','破血','化瘀']
细辛			温						辛		肺		心									肾		['祛风','散寒','通窍','止痛','温肺','祛痰']
霞草	微寒							甘	辛												肝			['清热','凉血']
夏枯草	寒						苦		辛									胆			肝			['清火','明目','散结','消肿']
夏天无			温				苦		微辛												肝			['活血','通络','行气','止痛']
仙鹤草					平		苦						心								肝			['收敛','止血','截疟','止痢','解毒']
仙灵脾			温					甘	辛												肝	肾		['补肾阳','强筋骨','祛风湿']
仙茅		热							辛											脾	肝	肾		['补肾阳','强筋骨','祛寒湿']
仙人掌	寒						苦										胃							['行气','活血','凉血','止血','解毒','消肿']
相思子					平		苦						心	大肠			胃							['催吐','杀虫','消肿']
香豉				凉			苦		辛		肺						胃							['解表','除烦','宣发郁热']
香附					平		微苦	微甘	辛						三焦						肝			['行气','解郁','调经','止痛']
香加皮			温				苦		辛				心								肝	肾		['祛风湿','壮筋骨','利小便']
香青蒿	寒						苦		辛									胆			肝			['清虚热','除骨蒸','解暑热','截疟','退黄']
香薷			微温						辛		肺						胃							['发汗','解表','和中','利湿']
香玉竹	微寒							甘			肺						胃							['养阴','润燥','生津','止渴']
香橼			温			酸	苦		辛		肺									脾	肝			['舒肝','理气','宽中','化痰']
小驳骨			温						辛												肝	肾		['祛瘀','止痛','续筋','接骨']
小飞扬草				凉		酸																		['清热','解毒','利湿','止痒']
小茴香			温						辛								胃			脾	肝	肾		['祛寒','止痛','理气','和胃']
小蓟				凉			苦	甘					心								肝			['凉血','止血','祛瘀','消肿']
小麦	微寒							甘					心											['养心','除烦']
小通草	寒							甘			肺						胃							['清热','利尿','下乳']
小叶莲					平			甘																['调经','活血']
缬草			温					甘	辛				心								肝			['安神','理气','活血','止痛']
薤白			温				苦		辛		肺		心	大肠			胃							['通阳','散结','行气','导滞']
蟹爪	寒									咸											肝			['破血','消积','堕胎']
辛夷			温						辛		肺						胃							['散风寒','通鼻窍']
杏仁			微温				苦				肺			大肠									小毒	['降气','止咳','平喘','润肠','通便']
雄黄			温						辛					大肠							肝			['解毒','杀虫','燥湿','祛痰','截疟']
熊胆	寒						苦						心					胆			肝			['清热','解毒','清肝','明目']
徐长卿			温						辛								胃				肝			['祛风','化湿','行气','通络']
续断			微温				苦		辛												肝	肾		['补肝肾','强筋骨','续折伤','止崩漏']
萱草根				凉				甘											膀胱	脾	肝		有毒	['清热','利湿','凉血','止血','解毒','消肿']
玄参	微寒						苦	甘		咸	肺						胃					肾		['凉血','滋阴','泻火','解毒']
玄胡索			温				苦		辛				心							脾	肝			['活血','止痛','行气']
旋覆花			微温				苦		辛	咸	肺						胃							['降气','消痰','行水','止呕']
雪莲花			温				微苦	甘													肝	肾		['祛风湿','补肝阳','强筋骨','调经','止血']
雪上一支蒿			温				苦		辛												肝		大毒	['祛风湿','活血','止痛']
血竭					平			甘		咸			心								肝			['祛瘀','定痛','止血','生肌']
血余炭					平		苦										胃				肝			['收敛','止血','化瘀','利尿']
寻骨风					平		苦		辛								胃				肝			['祛风','通络','行气','止痛']
荨麻			温				苦		辛														有毒	['祛风','定惊','消食','通便']
鸦胆子	寒						苦							大肠							肝		有毒	['清热','解毒','截疟','止痢','腐蚀','赘疣']
鸭脚木皮				凉			苦				肺													['发汗','解表','清热','解毒','散瘀','消肿','祛风','除湿']
鸭跖草	寒							甘			肺						胃		膀胱					['清热','解毒','利水','消肿']
亚麻子					平			甘			肺			大肠							肝			['润燥','祛风']
延胡索			温				苦		辛											脾	肝			['活血','散瘀','理气','止痛']
岩参					平				辛															['行气','止痛','止泻痢']
岩黄莲				凉			苦																	['清利','湿热','散瘀','消肿']
岩椒草				凉			苦		辛		肺						胃				肝			['解表','截疟','活血','解毒']
盐蛇干	寒									咸											肝			['祛风','定惊','解毒','散结']
燕窝					平			甘			肺						胃					肾		['养阴','润燥','益气','补中']
羊耳菊			温				微苦	甘	辛															['祛风','利湿','行气','利湿','解毒','消肿']
羊红膻			温					甘	辛		肺		心							脾		肾		['温肾','助阳','活血','化瘀','养心','安神','温肺','散寒']
羊蹄	寒						苦						心	大肠							肝		有毒	['清热','通便','利水','止血','杀虫']
羊蹄草				凉			微苦																	['清热','解毒','消炎','利尿']
阳起石			温							咸												肾		['温肾','壮阳']
洋金花			温						辛		肺										肝		有毒	['平喘','止咳','镇痛','解痉']
野菊花	微寒						苦		辛				心								肝			['清热','解毒','消肿','凉肝','明目']
野马追					平		苦				肺													['化痰','止咳','平喘']
野棉花	寒						苦																有毒	['清热','利湿','杀虫','散瘀']
叶下珠	寒						微苦													脾	肝			['清热','解毒','止泻','平肝','明目']
叶象花	寒						苦														肝			['凉血','调经','散瘀','消肿']
一点血	微寒						苦	甘													肝	肾		['补气','养血','散瘀','止血']
一支箭	微寒						苦	甘													肝			['清热','解毒','活血','祛瘀']
一枝黄花				凉			苦		辛		肺										肝			['疏风','清热','解毒','消肿','止痛']
伊贝母	微寒						苦	甘			肺		心											['清热','润肺','化痰','止咳']
饴糖			温					甘			肺						胃			脾				['补中','益气','缓急','止痛','润肺','止咳']
益母草	微寒						苦		辛				心						膀胱		肝			['活血','调经','利尿','消肿']
益智			温						辛											脾		肾		['温脾','止泻','摄唾','暖肾','固精','缩尿']
益智仁			温						辛											脾		肾		['暖肾','固精','缩尿','温脾','开胃','摄唾']
薏苡仁				凉				甘			肺						胃			脾				['健脾','利湿','除痹','止泻','清热','排脓']
翼首草	寒						苦																	['解毒','除瘟','清热','止痢','祛风','通痹']
阴香根			温					微甘	辛															['祛风','散寒','温中','止痛','止血']
阴香皮			温					甘	辛					大肠			胃				肝	肾		['温中','止痛','祛风','散寒','解毒','消肿','止血']
茵陈	微寒						苦		辛								胃		膀胱	脾				['清湿热','退黄疸']
茵陈蒿	微寒				平		苦										胃	胆		脾	肝			['清热','利湿','利胆','退黄']
银柴胡	微寒							甘									胃				肝			['清虚热','除疳热']
银耳					平			甘			肺						胃					肾		['润肺','生津','滋阴','养胃']
银花	寒							甘			肺		心				胃							['清热','解毒','疏散风热']
银杏叶					平		苦	甘			肺		心											['敛肺','平喘','活血','化瘀','止痛']
淫羊藿			温					甘	辛												肝	肾		['补肾阳','强筋骨','祛风湿']
罂粟壳					平	酸					肺			大肠								肾		['敛肺','涩肠','止痛']
樱桃核			温						辛		肺													['发表','透疹','消瘤','去瘢','行气','止痛']
鹰不泊			微温				苦		辛		肺						胃							['祛风','消肿','行气','止痛','利湿','退黄']
迎春花					平		苦		微辛										膀胱			肾		['清热','解毒','活血','消肿']
油松节			温				苦		辛												肝	肾		['祛风','除湿','通络','止痛']
余甘子				凉		酸		甘			肺						胃							['清热','凉血','消食','健胃','生津','止咳']
鱼腥草	微寒								辛		肺													['清热','解毒','消痈','排脓','利尿','通淋']
禹白附			温					甘	辛								胃				肝		有毒	['祛风痰','止痉','上痛','解毒','散结']
禹余粮	微寒							甘						大肠			胃							['涩肠','止泻','收敛','止血']
禹州漏芦	寒						苦										胃							['清热','解毒','排脓','止血','消痈','下乳']
玉米须					平			甘									胃	胆			肝	肾		['利尿','消肿','降压']
玉叶金花				凉			微苦	甘												脾	肝			['清热','疏风','凉血','解毒']
玉竹	微寒							甘			肺						胃							['养阴','润燥','生津','止渴']
郁金	寒						苦		辛		肺		心								肝			['活血','止痛','行气','化疥','清心','解郁','利胆','退黄']
郁李仁					平		苦	甘	辛					大肠		小肠				脾				['缓泻','利尿']
预知子	寒						苦										胃	胆	膀胱		肝			['疏肝','理气','活血','止痛','除烦','利尿']
御米壳					平	酸					肺			大肠								肾	有毒	['敛肺','涩肠','止痛']
芫花			温				苦		辛		肺									脾		肾		['泻水','逐饮','外用','杀虫','疗疮']
芫荽子					平				辛		肺						胃							['发表','透疹','健胃']
远志			温				苦		辛		肺		心									肾		['安神','益智','祛痰','消肿']
月季花			温					甘													肝			['活血','调经','疏肝','解郁']
粤丝瓜络					平			甘			肺						胃				肝			['除湿火','通脉络']
云茯苓					平			甘			肺		心							脾		肾		['利水','渗湿','健脾','宁心']
云苓					平			甘			肺		心							脾		肾		['利水','渗湿','健脾','宁心']
芸薹子					平			甘	辛					大肠							肝			['活血','化瘀','消肿','散结','润肠','通便']
枣仁			温					甘					心				胃			脾				['补中','益气','养血','安神']
皂矾				凉		酸														脾	肝			['解毒','燥湿','杀虫','补血']
皂荚			温						辛	咸	肺			大肠									小毒	['祛顽痰','通窍','开闭','祛风','杀虫']
皂角			温						辛	咸	肺			大肠									有毒	['开窍','祛痰','散结','消肿','润燥','通便']
皂角刺			温						辛								胃				肝			['消肿','托毒','排脓','杀虫']
皂角剌			温						辛								胃				肝			['消肿','托毒','排脓','杀虫']
灶心土			温						辛								胃			脾				['温经','止血','止呕','止泻']
泽兰			微温				苦													脾	肝			['行血','利尿','散郁','舒肝']
泽漆	微寒						苦		辛					大肠		小肠				脾			有毒	['利水','消肿','化痰','止咳','解毒','杀虫']
泽泻	寒							甘											膀胱			肾		['利小便','清湿热']
楂曲			温					甘	辛								胃			脾				['消食','和胃']
樟柳头	寒								辛														有毒	['利水','消肿','清热','解毒']
樟木			温						辛											脾	肝			['祛风','散寒','温中','理气','活血','通络']
樟脑		热							辛				心							脾			有毒	['开窍','辟秽','除湿','杀虫','温散','止痛']
长春花	寒						苦																	['解毒','抗癌','清热','平肝']
掌叶半夏			温				苦		辛		肺									脾	肝		有毒	['燥湿','化痰','祛风','止痉','散结','消肿']
赭石	寒						苦				肺		心				胃				肝			['平肝','潜阳','重镇','降逆','凉血','止血']
浙贝母	寒						苦				肺		心											['清热','散结','化痰','止咳']
珍珠	寒							甘		咸			心								肝			['安神','定惊','明目','消翳','解毒','生肌']
珍珠菜					平				辛															['活血','调经','利湿','健脾','解毒','消肿']
珍珠草				凉			苦	甘			肺										肝			['利湿','退黄','清热','解毒','明目','消积']
珍珠母	寒									咸			心								肝			['平肝','潜阳','定惊','明目']
知母	寒						苦	甘			肺						胃					肾		['清热','泻火','生津','润燥']
栀子	寒						苦				肺		心		三焦									['泻火','除烦','清热','利尿','凉血','解毒','消肿','止痛']
栀子皮	寒						苦				肺		心		三焦									['泻火','除烦','清热','利湿','凉血','解毒','消肿','止痛']
蜘蛛香			温				微苦		辛				心				胃			脾				['理气','止痛','消食','止泻','祛风','除湿','镇惊','安神']
枳椇子					平			甘									胃							['止渴','除烦','清湿热','解酒毒']
枳壳			温			酸	苦		辛								胃			脾				['理气','宽中','行滞','消胀']
枳实	微寒					酸	苦		辛								胃			脾				['破气','消积','化痰','散痞']
制乳香			温				苦		辛				心							脾	肝			['活血','定痛','消肿','生肌']
制首乌			微温				苦	甘					心								肝	肾		['补肝肾','益精血','乌须发','强筋骨','化浊','降脂']
炙甘草			温					甘			肺		心				胃			脾				['补脾','和胃','益气','复脉']
炙黄芪			温					甘			肺									脾				['益气','补中']
钟乳石			温					甘			肺						胃					肾		['温肺','助阳','平喘','制酸','通乳']
肿节风					平		苦		辛				心								肝			['清热','凉血','活血','消斑','祛风','通络']
重楼	微寒						苦														肝		有毒	['清热','解毒','消肿','止痛','凉肝','定惊']
朱茯神					平			甘			肺		心							脾		肾		['宁心','安神']
朱砂	微寒							甘					心										有毒	['清心','镇惊','安神','解毒']
朱砂根				凉			苦		辛		肺										肝			['解毒','消肿','活血','止痛','祛风','除湿']
珠子参	寒						苦	甘			肺						胃				肝			['清肺','养阴','散瘀','止血']
猪胆粉	寒						苦				肺			大肠				胆			肝			['清热','润燥','解毒','止咳','平喘']
猪苓					平			甘											膀胱			肾		['利尿','渗湿']
猪牙皂			温						辛	咸	肺			大肠									有毒	['开窍','祛痰','散结','消肿']
竹节参			温				微苦	甘			肺									脾	肝			['滋补','强壮','散瘀','止痛','止血','祛痰']
竹沥	寒						苦	甘			肺		心								肝			['清热','降火','滑痰','利窍']
竹茹	微寒							甘									胃	胆		脾				['清热','化痰','除烦','止呕']
竹叶	寒							甘	辛				心			小肠	胃							['清热','泻火','除烦','利尿','生津']
竹叶椒			温				微苦		辛								胃			脾				['温中','燥湿','散寒','止痛','驱虫','止痒']
竹叶卷心	寒							甘					心			小肠	胃							['清热','泻火','除烦','止渴','利尿','通淋']
竹叶心	寒							甘	辛				心			小肠	胃							['清热','泻火','除烦','清心','利尿']
苎麻根	寒							甘					心						膀胱		肝			['凉血','止血','清热','安胎','利尿','解毒']
梓实					平			甘											膀胱			肾		['利尿','消肿']
紫贝齿					平					咸											肝			['镇惊','安神','平肝','明目']
紫背天葵子	寒						苦	甘									胃				肝			['清热','解毒','消肿','散结']
紫草	寒							甘		咸			心								肝			['凉血','活血','解毒','透疹']
紫草茸					平			甘		咸										脾	肝			['清热','凉血','解毒']
紫浮萍	寒								辛		肺								膀胱					['宣散风热','透疹','止痒','利尿','消肿']
紫河车			温					甘		咸	肺		心									肾		['温肾','补精','养血','益气']
紫花地丁	寒						苦		辛				心								肝			['清热','解毒','凉消肿']
紫花前胡	寒						苦		辛		肺													['降气','化痰','散风','清热']
紫梢花			温					甘														肾		['补肾','助阳','固精','缩尿']
紫石英			温					甘			肺		心									肾		['镇静','安神','温肺','暖官']
紫苏			温						辛		肺									脾				['解表','散寒','行气','宽中']
紫苏梗			温						辛		肺									脾				['理气','宽中','止痛','安胎']
紫苏叶			温						辛		肺									脾				['解表','散寒','行气','和胃']
紫苏子			温						辛		肺													['降气','化痰','止咳','平喘','润肠','通便']
紫菀			微温				苦	甘	辛		肺													['润肺','化痰','止咳']
紫玉簪					平			甘			肺											肾	有毒	['拔脓','解毒','生肌']
紫苑			温				苦		辛		肺													['润肺','下气','消痰','止咳']
紫珠				凉			苦				肺						胃				肝			['收敛','止血']
紫珠叶				凉			苦				肺						胃				肝			['收敛','止血','清热','解毒']
自然铜					平				辛												肝			['散瘀','接骨','止痛']
棕边炭					平		苦				肺			大肠							肝			['收敛','止血']
棕榈					平		苦				肺			大肠							肝			['收敛','止血','止痢','止带']
棕榈炭					平		苦				肺			大肠							肝			['收敛','止血']
走马箭			温			酸		甘																['祛风','除湿','活血','散瘀']
走马胎			温						辛											脾	肝			['祛风湿','壮筋骨','活血','祛瘀']
醉鱼草																								['止咳','定喘','活血','祛瘀','驱虫']
酢浆草	寒					酸					肺								膀胱		肝			['清热','利湿','凉血','散瘀','解毒','消肿']
金汁	寒						苦																	化五脏热毒
胆草	寒						苦		辛		肺										肝			凉血，清热，利水，解毒
九节菖蒲			温						辛				心							脾	肝		小毒	化痰开窍、祛风除湿、消食醒脾、解毒。
象皮粉			温					甘		咸									膀胱	脾				生肌敛疮
玄明粉	寒						苦			咸				大肠			胃							泻热通便，润燥软坚，清火消肿
醋			温			酸	苦										胃				肝			活血化瘀，开胃消食，消肿软坚，散瘀破结
白杨叶																								祛风止痛；解毒敛疮。
金钱莲				凉				甘			肺								膀胱		肝	肾		清热凉血、袪风利湿、强心利尿、固肾、平肝
荷蒂					平		苦																	和胃安胎，止血止带
陈米					平			甘									胃							养胃利小便
石莲子							微苦	甘					心				胃			脾				清湿热，开胃进食，清心宁神，涩精止泄
白檀			温						辛		肺						胃			脾				理气，散寒，和胃，止痛
假蒟			温				苦				肺		心	大肠						脾				祛风散寒；行气止痛；活络；消肿
山羊角	寒									咸			心								肝			镇静清热、去翳明目、活血止血
地精草				凉					辛												肝			清热平肝
麦麸	寒							甘									胃			脾				止汗，止泻，散瘀
银箔	大寒				平				辛				心								肝			安神镇惊
海粉	寒							甘		咸	肺											肾		清热养阴；软坚消痰
酱	寒									咸							胃			脾		肾		清热解毒
荆沥				凉				甘					心								肝			除风热，化痰涎，通经络，行气血
鸡子黄					平			甘					心									肾		['滋阴','润燥','养血','息风']
制马前子			温				苦													脾	肝		大毒	['通络','止痛','散结','消肿']
毛冬青				凉			苦		辛		肺		心											['活血','通脉','清热','解毒']
淡菜			温					甘		咸											肝	肾		['补肝肾','益精血','消瘿瘤']
冰糖					平			甘			肺									脾				['健脾','和胃','润肺'，'止咳']
猪脊髓					平			甘													肝	肾		['补精髓','益肾阴']
虎骨			温					甘	辛												肝	肾		['祛风','通络','强筋','健骨']
六月雪				凉			苦		辛											脾	肝			['清热','解毒','祛风','利湿']
棉子油		热							辛				心				胃						微毒	['治恶疮','疗疥癣']
黄蜡			微温					甘												脾				['解毒','敛疮','生肌','止痛']
石橄榄				凉				甘												脾	肝	肾		['清热','养阴'，'化痰','止咳'，'润肺','生津'，'利湿'，'消瘀']
桃叶					平		苦		辛											脾		肾		['祛风','清热'，'燥湿','解毒'，'杀虫']
藤梨根					平						肺			大肠							肝			['清热','利湿','解毒','消肿','抗癌','抗肿瘤','祛风','除湿','利尿','止血']
山芋					平			甘												脾		肾		['补中','和血','益气','生津','宽肠','通便']
钟乳			温					甘			肺						胃					肾		['温肺'，'助阳'，'平喘'，'制酸']
荜薢					平		苦										胃		膀胱		肝			['祛风湿','利湿浊']
龙牙偬木					平		微苦	甘	辛				心							脾	肝	肾	小毒	['健胃','利水'，'祛风','除湿'，'活血','止痛']
松脂			温				苦													脾				['祛风'，'杀虫']
干地黄	微寒						苦	甘					心								肝	肾		滋阴清热，凉血补血
北黄芪			微温					甘			肺									脾				['补气','固表','利尿','托毒','排脓','生肌']
炙远志			温				苦		辛		肺		心									肾		['安神','益智','祛痰','消肿']
紫丹参	微寒						苦						心								肝			['祛瘀','止痛','活血','痛经','清心','除烦']
白蔻仁			温						辛		肺						胃			脾				['化湿','行气','温中','止呕','开胃','消食']
熟大黄	寒						苦					心包	心	大肠			胃			脾	肝			['泻热','通便','凉血','解毒','逐瘀','通经']
川木瓜			温			酸														脾	肝			['平肝','舒筋','和胃','化湿']
白菊花	微寒						苦	甘			肺										肝			['散风','清热','平肝','明目']
绿茶	微寒						苦	甘			肺		心				胃							['清上','除烦','化痰','消食','利尿','清热','解毒',]
莲米					平			甘					心							脾		肾		['补脾','止泻','益肾','固精','养心','安神']
石楠藤			温						辛											脾	肝			['祛风','除湿','舒筋','强骨','除痹']
炙僵蚕					平				辛	咸	肺						胃				肝			['祛风','定惊','化痰','散结']
广地龙	寒									咸									膀胱	脾	肝			['清热','定惊','通络','平喘','利尿']
全蝎粉					平				辛												肝		有毒	['息风','镇痉','攻毒','散结','通络','止痛']
苦蒌根	寒						微苦	甘			肺			大肠			胃							['清热','涤痰','宽胸','散结','润燥','滑肠']
川椒		热							辛					大肠			胃						有毒	['温中','散寒','下气','消痰']
生杜仲			温					甘													肝	肾		['补肝肾','强筋骨','安胎']
茯神木					平			甘					心							脾				['宁心','安神','利水']
红人参			温				微苦	甘			肺		心							脾		肾		['大补','元气','复脉','固脱','益气','摄血']
甘枸杞子					平			甘													肝	肾		['滋补','肝肾','益精','明目']
制马钱子			温				苦													脾	肝		有毒	['清肺','利咽','止血']
制没药					平		苦		辛				心							脾	肝			['散瘀','定痛','消肿','生肌']
炙全蝎					平				辛												肝		有毒	['息风','镇痉','攻毒','散结','通络','止痛']
获苓					平			甘			肺		心							脾		肾		['利水','渗湿','健脾','宁心']
桑葚子	寒							甘					心								肝	肾		['滋阴','补血','润肠','生津']
青蛙皮				凉				甘			肺								膀胱	脾				['利水','消肿','清热','解毒','补虚']
川羌活			温				苦		辛										膀胱			肾		['解表','散寒','祛风','除湿','止痛']
吴白芷			温						辛		肺			大肠			胃							['散风','除湿','通窍','止痛','消肿','排脓']
川独活			微温				苦		辛										膀胱			肾		['祛风','除湿','通痹','止痛']
橘络					平		苦	甘			肺									脾				['通络','化痰','止咳']
白酒			温				苦	甘	辛		肺		心				胃				肝			['通脉']
松木皮			温				苦				肺			大肠										['祛风','除湿','活血','止血','敛疮','生肌']
川芍	微寒					酸	苦													脾	肝			['平肝','止痛','养血','调经','敛阴','止汗']
刺五加皮			温				苦		辛												肝	肾		['祛风湿','补肝肾','强筋骨']
熟干地			微温					甘													肝	肾		['补血','滋阴','益精','填髓']
琥珀粉					平			甘					心			小肠					肝			['镇惊','安神','散瘀','止血','利水','通淋','去翳','明目']
抚芎			温						辛			心包	心					胆			肝			['镇心','平肝','消痈','解毒']
铁粉				凉					辛				心								肝			['平肝','镇心','消痈','解毒']
软石膏	大寒							甘	辛		肺						胃							['清热','降火','除烦','止渴']
栀子仁	寒						苦				肺		心		三焦									['泻火','除烦','清热','利尿','凉血','解毒','消肿','止痛']
香白芷			温						辛		肺			大肠			胃							['散风','除湿','通窍','止痛','消肿','排脓']
紫背天葵	寒						苦	甘									胃				肝			['清热','解毒','消肿','散结']
人工牛黄				凉				甘					心								肝			['清心','豁痰','开窍','凉肝','息风','解毒']
水蛙				凉				甘			肺								膀胱	脾				['利水','消肿','清热','解毒','补虚']
荜拨		热							辛					大肠			胃							['温中','散寒','下气','止痛']
苏合香油			温						辛				心							脾				['开窍','辟秽','豁痰','止痛']
白檀香			温						辛		肺		心				胃			脾				['行气','温中','开胃','止痛']
草蔻仁			温						辛								胃			脾				['燥湿','行气','温中','止呕']
焰硝			温				苦			咸	肺		心							脾			小毒	['攻坚','破积','利水','泻下','解毒','消肿']
山栀子	寒						苦				肺		心		三焦									['泻火','除烦','清热','利尿','凉血','解毒','消肿','止痛']
菩蒌根	寒						微苦	甘			肺			大肠			胃							['清热','涤痰','宽胸','散结','润燥','滑肠']
龙脑	寒						苦		辛		肺		心							脾				['开窍','醒神','清热','止痛']
归身			温					甘	辛				心							脾	肝			['补血','活血','调经','止痛','润肠','通便']
土木鳖				凉			苦	微甘																['散结','消肿','攻毒','疗疮']
柳槐枝					平		苦						心								肝			['散瘀','止血','清热','燥湿','祛风','杀虫']
熟火黄				凉			苦		辛															['清热','解毒','止血','祛瘀','通便','杀虫']
黑牵牛子					平		苦														肝	肾		['祛风','除湿','通经','解毒']
白牵牛子	寒						苦				肺			大肠								肾		['泻水','通便','消痰','涤饮','杀虫','攻积']
川贝母粉	微寒						苦	甘			肺		心											['清热','润肺','化痰','止咳']
熟甘草			温					甘			肺		心				胃			脾				['补脾','和胃','益气','复脉']
兰香				凉					辛		肺										肝			['宣散','风热','清头目','透疹']
酒知母	寒						苦	甘			肺						胃					肾		['清热','泻火','生津','润燥']
煅青礞石					平			甘		咸	肺		心								肝			['坠痰','下气','平肝','镇惊']
炙蜈蚣			温						辛												肝			['息风','镇痉','攻毒','散结','通络','止痛']
稀签草	寒						苦		辛												肝	肾		['祛风湿','利关节','解毒']
寄生					平		苦	甘													肝	肾		['补肝肾','强筋骨','祛风湿','安胎元']
辰茯苓					平			甘			肺		心							脾		肾		['利水','渗湿','健脾','宁心']
姜竹茹	微寒							甘									胃	胆		脾				['清热','化痰','除烦','止呕']
蛰虫	寒									咸											肝		小毒	['破血','化瘀','续筋','接骨']
广角粉	寒						苦														肝			['清热','凉血','解毒','定惊']
诃子肉					平	酸	苦				肺			大肠										['涩肠','敛肺','降水','利咽']
荜拔		热							辛					大肠			胃							['温中','散寒','下气','止痛']
广木香			温				苦		辛					大肠	三焦		胃	胆		脾				['行气','止痛','健脾','消食']
牡丹					平		苦														肝			['活血','调经']
淫羊霍			温					甘	辛												肝	肾		['补肾','强骨','祛风','除湿']
姜炭			温				苦		辛											脾	肝	肾		['温经','止血','温脾','止泻']
大腹子			微温						辛					大肠		小肠	胃			脾				['行气','宽中','行水','消肿']
巴戟肉			微温					甘	辛												肝	肾		['补肾阳','强筋骨','祛风湿']
莲肉					平			甘					心							脾		肾		['补脾','止泻','益肾','固精','养心','安神']
大豆				凉				甘													肝	肾		['补肝','补肾','祛风','解毒']
干荷叶					平		苦										胃			脾	肝			['清暑','化湿','升发','清阳','凉血','止血']
生南星			温				苦		辛		肺									脾	肝		有毒	['化痰','燥湿','祛风','止痉','散结','消肿']
生川乌		热					苦		辛				心							脾	肝	肾	大毒	['祛风','除湿','温经','止痛']
生附子		热						甘	辛				心							脾		肾	大毒	['回阳','救逆','补火','助阳','散寒','止痛']
桂枝尖			温					甘	辛		肺		心						膀胱					['发表','解肌','温经','通脉','助阳','化气','平冲','降气']
制川乌		热					苦		辛				心							脾	肝	肾	大毒	['祛风','除湿','温经','止痛']
制草乌		热					苦		辛				心							脾	肝	肾	大毒	['祛风','除湿','散寒','止痛']
广三七			温				微苦	甘									胃				肝			['散瘀','止血','消肿','定痛']
泽兰叶			微温				苦													脾	肝			['行血','利尿','散郁','舒肝']
牙皂			温						辛	咸	肺			大肠									有毒	['开窍','祛痰','散结','消肿']
樟冰		热							辛				心							脾			有毒	['开窍','辟秽','除湿','杀虫','温散','止痛']
腰黄			温						辛					大肠							肝			['解毒','杀虫','燥湿','祛痰','截疟']
良姜		热							辛								胃			脾				['温胃','止呕','散寒','止痛']
甲片	微寒									咸							胃				肝			['通经','下乳','消肿','排脓','搜风','通络']
白胡椒		热							辛					大肠			胃						有毒	['温中','散寒','下气','消痰']
生草乌		热					苦		辛				心							脾	肝	肾	大毒	['祛风','除湿','散寒','止痛']
制天南星			温				苦		辛		肺									脾	肝		有毒	['燥湿','化痰','祛风','解痉','散结','消肿']
怀熟地黄			微温					甘													肝	肾		['补血','滋阴','益精','填髓']
肉蔻仁			温						辛					大肠			胃			脾			有毒	['温中','行气','涩肠','止泻']
熟附块		热						甘	辛				心							脾		肾	大毒	['回阳','救逆','补火','助阳','散寒','止痛']
北五味子			温			酸		甘			肺		心									肾		['收敛','固涩','益气','生津','补肾','宁心']
故纸			温				苦		辛											脾		肾		['温肾','助阳','纳气','止泻']
家韭子			温					甘	辛												肝	肾		['温补','肝肾','壮阳','固精']
川巴戟天			微温					甘	辛												肝	肾		['补肾阳','强筋骨','祛风湿']
香附子					平		微苦	微甘	辛						三焦						肝			['行气','解郁','调经','止痛']
栝楼实	寒						微苦	甘			肺			大肠			胃							['清热','涤痰','宽胸','散结','润燥','滑肠']
瓜蒌实	寒						微苦	甘			肺			大肠			胃							['清热','涤痰','宽胸','散结','润燥','滑肠']
老葱			温						辛		肺						胃							['发表','通阳','解毒','杀虫']
黄酒	寒						苦					心包		大肠			胃			脾	肝			['泻下','攻积','清热','泻火','凉血','解毒','逐瘀','通经','利湿','退黄']
全瓜萎	寒						微苦	甘			肺			大肠			胃							['清热','涤痰','宽胸','散结','润燥','滑肠']
大青	寒						苦						心				胃							['清热','解毒','凉血','清斑']
茅根	寒							甘			肺						胃		膀胱					['凉血','止血','清热','利尿']
元明粉	寒								辛	咸				大肠			胃							['泻热','通便','润燥','软坚','消肿','散结']
莱菔					平			甘	辛		肺						胃			脾				['下气','祛痰','消食','化积']
田三七			温				微苦	甘									胃				肝			['散瘀','止血','消肿','定痛']
焦栀子	寒						苦				肺		心		三焦									['泻火','除烦','清热','利尿','凉血','解毒','消肿','止痛']
营蒲			温				苦		辛				心				胃							['开窍','豁痰','醒神','益智','化湿','开胃']
酥鳖甲	微寒									咸											肝	肾		['滋阴','潜阳','软坚','散结','退热','除蒸']
茶叶				凉			苦	甘			肺		心				胃							['清上','除烦','止渴','化痰','消食','利尿','解毒']
延胡			温				苦		辛											脾	肝			['活血','散瘀','理气','止痛']
黑栀	寒						苦				肺		心		三焦									['泻火','除烦','清热','利湿','凉血','解毒','消肿','止痛']
金铃子	寒						苦									小肠			膀胱		肝			['清肝','泻火','行气','止痛']
玄胡			温				苦		辛				心							脾	肝			['活血','止痛','行气']
炮甲	微寒									咸							胃				肝			['通经','下乳','消肿','排脓','搜风','通络']
苏梗			温						辛		肺									脾				['理气','宽中','止痛','安胎']
豆豉				凉			苦		辛		肺						胃							['解表','除烦','宣发','郁热']
川佛手			温			酸	苦		辛		肺									脾	肝			['舒肝','理气','和胃','止痛']
甲珠	微寒									咸							胃				肝			['活血','消癥','通经','下乳','搜风','通络','消肿','排脓']
铁落花				凉					辛				心								肝			['平肝','镇惊','解毒','敛疮','止血']
焦槟榔			温				苦		辛					大肠			胃							['驱虫','消积','下气','行水']
素馨花					平		苦														肝			['行气','调经','止痛','清热','散结']
生牡砺	微寒									咸								胆			肝	肾		['潜阳','补阴','重镇','安神','软坚','散结','收敛','固涩','制酸','止痛']
瓜萎根	寒						微苦	甘			肺			大肠			胃							['清热','涤痰','宽胸','散结','润燥','滑肠']
鼠妇				凉		酸															肝			['破血','利水','解毒','止痛']
葶苈	大寒						苦		辛		肺								膀胱					['泻肺','平喘','行气','消肿']
紫葳	寒					酸	苦														肝			['清热','解毒','活血','止血']
蟅虫	寒									咸											肝		小毒	['破血','化瘀','续筋','接骨']
蜂窠					平			甘									胃							['祛风','攻毒','杀虫','止痛']
赤消			温				苦			咸	肺		心							脾			小毒	['攻坚','破积','利水','泻下','解毒','消肿']
蜣螂	寒									咸													有毒	['解毒','消肿','通便']
清茶				凉			苦	甘			肺		心				胃							['清上','除烦','止渴','化痰','消食','利尿','解毒']
苦梗					平		苦		辛		肺													['宣肺','祛痰','利咽','排脓']
白附			温						辛								胃				肝		有毒	['祛风痰','定惊搐','解毒','散结','止痛']
蜜炙柏	寒						苦												膀胱			肾		['清热','燥湿','泻火','除蒸','解毒','疗疮']
靛花	寒									咸											肝			['清热','凉血','定惊']
滴乳石					平	酸															肝			['化瘀','止血']
白糖					平			甘			肺									脾				['润肺','生津']
漂东丹	微寒								辛				心							脾	肝		有毒	['拔毒','生肌','杀虫','止痒','坠痰','镇惊','攻毒','截疟']
铅粉	微寒								辛				心								肝		有毒	['拔毒','生肌','杀虫','止痒']
白蜡			温					甘													肝			['止血','生肌','定痛']
制炉甘石					平			甘												脾	肝			['解毒','明目','退翳','收湿','止痒','敛疮']
象皮			温					甘		咸									膀胱	脾				['止血','敛疮']
梅片	寒						苦		辛		肺		心							脾				['开窍','醒神','清热','止痛']
砂仁壳			温						辛								胃			脾		肾		['化湿','开胃','温脾','止泻','理气','安胎']
铁落				凉					辛				心								肝			['平肝','镇惊']
炙桑白皮	寒							甘			肺													['泻肺','平喘','利水','消肿']
瓜壳	寒							甘			肺						胃							['清肺','化痰','利气','宽胸']
瓜萎壳	寒							甘			肺						胃							['清肺','化痰','利气','宽胸']
制乌头		热					苦		辛				心							脾	肝	肾	大毒	['祛风','除湿','温经','止痛']
赤箭					平			甘													肝			['平肝','息风','止痉']
干蝎					平				辛												肝		有毒	['息风','镇痉','攻毒','散结','通络','止痛']
川苛			温						辛			心包	心					胆			肝			['活血','行气','祛风','止痛']
秦九					平		苦		辛								胃	胆			肝			['祛风湿','退虚热','舒筋','止疼']
肉桂心		大热						甘	辛				心							脾	肝	肾		['补火','助阳','引火','归元','散寒','止痛','温通','经脉']
川乌头		热					苦		辛				心							脾	肝	肾	大毒	['祛风','除湿','温经','止痛']
制附		热						甘	辛				心							脾		肾	大毒	['回阳','救逆','补火','助阳','散寒','止痛']
天竹黄	寒							甘					心								肝			['清热','豁痰','凉心','定惊']
守宫	寒									咸											肝			['化痰','散结','利尿']
羚角	寒									咸			心								肝			['平肝','息风','清肝','明目','散血','解毒']
贯仲	微寒						苦										胃				肝			['清热','解毒','杀虫','止血']
蒸木香			温				苦		辛					大肠	三焦		胃	胆		脾				['行气','止痛','健脾','消食']
豹骨			温					甘	辛												肝	肾		['祛风','通络','强筋','健骨']
金箔					平		苦		辛				心								肝			['镇心','安神','解毒']
象贝	寒						苦				肺		心											清热化痰，开郁散结
栀皮	寒						苦				肺		心		三焦									['泻火','除烦','清热','利湿','凉血','解毒','消肿','止痛']
地黄	寒							甘					心								肝	肾		['清热','凉血','养阴','生津']
黑附子		大热						甘	辛				心							脾		肾	大毒	['回阳','救逆','补火','助阳','散寒','止痛']
玉郎伞					平		苦	甘	辛												肝			消瘀 消肿 补虚 宁神
瓜蒌仁	寒							甘			肺			大肠			胃							['清热','涤痰','宽胸','散结','润燥','滑肠']
冬枣			温					甘									胃			脾				补脾胃 益气 生精 调和 营卫 解毒
母猪藤	寒					酸	苦						心				胃				肝			['舒筋','活血']
黑米	寒							甘						大肠			胃							['止渴','除烦','调肠胃']
壁虎	寒									咸											肝	肾		['祛风','活络'，'散结','止痛'，'镇痛','解痉']
茄根				凉				甘						大肠		小肠	胃			脾				['清热','利湿','祛风','止咳']
草血竭	寒						苦		辛								胃			脾		肾		['散瘀','止血'，'下气','消积'，'解毒'，'利湿']
橘叶					平		苦		辛															['疏肝','行气'，'化痰'，'消肿毒']
脐带			温					甘		咸	肺		心								肝			['益肾'，'纳气']
鸡蛋黄					平			甘			肺		心									肾		['滋阴','润燥'，'养血','息风']
无名异					平			甘																['去瘀','止痛'，'消肿','生肌']
柿霜				凉				甘																['清热'，'润燥'，'化痰']
橄榄					平	酸		甘			肺						胃							['清肺'，'利咽'，'生津'，'解毒']
龟胶				凉				甘		咸			心								肝	肾		['滋阴'，'养血'，'止血']
灵砂			温					甘					心				胃						有毒	['祛痰','降逆','安神','定惊']
柿树叶	寒						苦				肺													['止渴'，'生津'，'平喘']
鹿骨		微热						甘														肾		['补虚赢','强筋骨']
鹿鞭			温							咸									膀胱		肝	肾		['补肾'，'壮阳'，'益精']
鹿筋			温							微咸											肝	肾		['壮筋骨']
鹿血			温					甘		咸											肝	肾		['养血','益精','止血','止带']
茱萸			微温			酸															肝	肾		['补益','肝肾','收涩','固脱']
蛇黄	寒							甘				心包									肝			安神镇惊 止血定痛
水银	寒								辛				心								肝	肾		消毒，泻下，利尿，杀虫，灭虱
云南白药			温				微苦	甘									胃				肝			['散瘀','止血','消肿','定痛']
千金子仁			温						辛		肺						胃		膀胱				有毒	逐水消肿 破症杀虫
蛴螬			微温							咸											肝		有毒	破血，行瘀，散结，通乳
梓白皮	寒						苦										胃	胆						清热利湿，降逆止吐，杀虫止痒
金雀根					平		苦		辛		肺									脾				清肺益脾，活血通脉
樗白皮	寒						苦							大肠			胃							除热，燥湿，涩肠，止血，杀虫
莲花蕊					平		苦	甘					心									肾		清心，益肾，涩精，止血
百草霜			温						辛		肺						胃				肝			止血，止泻，消积
鬼臼				凉			苦		辛		肺										肝		有毒	化痰散结，祛瘀止痛，清热解毒
草河车	寒						苦														肝		小毒	清热解毒，平喘止咳，熄风定惊
豨签草	寒								辛												肝	肾		祛风湿，利关节，解毒
马槟榔	寒							甘			肺									脾				清热解毒，生津止渴
枯矾	寒					酸					肺			大肠			胃			脾				消痰，燥湿，止泻，止血，解毒，杀虫
巴豆霜		热							辛					大肠			胃						大毒	泻寒积，通关窍，逐痰，行水，杀虫
蚕蛾			温							咸											肝	肾		补肾壮阳，涩精，止血，解毒消肿
法半夏			温						辛		肺						胃			脾			小毒	燥湿化痰
桉油				凉			苦		辛															祛风止痛
薄荷脑				凉					辛		肺													疏风，清热，解毒
紫硇砂			温				苦		辛	咸	肺						胃						有毒	破瘀消积，软坚蚀腐
甘青青兰	寒						苦	甘													肝			止咳化痰，和胃疏肝，清热利水
兔耳草	寒						苦	甘			肺										肝			清热解毒，降压，调经
川西獐牙菜				凉			苦	甘																清肝利胆，退热
印度獐牙菜				凉			苦																	清肝利胆，退热
石榴花					平	酸	苦				肺					小肠	胃		膀胱	脾				凉血，止血
石榴			温			酸		甘						大肠								肾		收敛止血，清热抑菌，安胎，解酒
波棱瓜子	寒						苦																	清肝利胆，健脾助运
止泻木子				凉			苦																	清热，利胆，止泻
大托叶云实			温				苦		辛		肺			大肠										温肾，逐寒
光明盐					平					咸											肝	肾		祛风明目，消食化积，解毒
紫檀香	寒									咸											肝			消肿，止血，定痛
珊瑚					平			甘					心								肝			去翳明目，安神镇惊，敛疮止血
角茴香	寒						苦														肝		小毒	清热解毒，消炎，镇痛
绿绒蒿	寒						苦							大肠							肝	肾	小毒	清热利湿，止咳
小檗	大寒						苦				肺									脾	肝			清热燥湿，泻火解毒
螃蟹	寒									咸							胃				肝			清热解毒，补骨添髓，养筋接骨，活血祛痰，利湿退黄
手参					平			甘			肺						胃			脾				止咳平喘，益肾健脾，理气和血，止痛
獐牙菜	寒						苦						心				胃				肝			清热解毒，疏肝利胆
巴夏嘎	寒						苦																	清热，愈疮，生肌，止血，明目
力嘎都	寒						苦				肺													清肺，降气，化痰止咳
榜嘎				凉			苦				肺						胃						小毒	清热，解毒，利湿
石灰华	寒							甘																清热补肺
藏紫草				凉				甘																清热凉血，养肺
酸藤果					平	酸		甘									胃							补血，收敛止血
制何首乌			温				苦	甘					心								肝	肾		补肝肾，益精血，乌须发，强筋骨
驴肾			温					甘		咸												肾		益肾壮阳，强筋健骨
薄荷油				凉					辛		肺										肝			疏风，清热
肉桂油		热						甘	辛								胃			脾				驱风，健胃
广藿香油			微温						辛		肺						胃			脾				['芳香','化浊','开胃','止呕','发表','解暑']
乌鸡					平			甘													肝	肾		养阴，退热，补中
三叉苦	寒						苦						心											清热解毒，祛风除湿
姜半夏			温						辛		肺						胃			脾			有毒	燥湿化痰，降逆止呕
生晒参			温				微苦	甘			肺									脾				补气固脱，补肺益脾，生津，安神，益智
藏茜草							苦		辛															清热凉血
炒白术			温				苦	甘									胃			脾				健脾益气，燥湿利水，止汗
盐车前子	寒							甘											膀胱			肾		补肝肾，明目
盐补骨脂			大温				苦		辛	咸												肾		补肾壮阳
驴鞭			温					甘		咸											肝	肾		补肾壮阳，强筋壮骨
狗鞭			温							咸												肾		温肾壮阳，补益
蛇胆				凉			微苦	甘												脾	肝			清热解毒，化痰镇痉
金盏银盘					平			甘																疏表清热，解毒，散瘀
牛鞭			温					甘		咸											肝	肾		补肾壮阳，益肾暖宫
羊鞭			温					甘		咸												肾		补肾壮阳，益气生精
岗梅				凉			苦	甘			肺						胃							清热解毒，生津，利咽，散瘀止痛
当归尾																								活血祛瘀
小叶枇杷			微温				苦		辛		肺													祛痰，止咳，平喘
蜂王浆					平	酸		甘												脾	肝	肾		滋补，强壮，益肝，健脾
人中白				凉						咸	肺		心						膀胱					清热降火，止血化瘀
天然冰片				凉			苦		辛		肺		心							脾				开窍醒神，清热止痛
龙血竭					平			甘		咸	肺									脾		肾		活血散瘀，定痛止血，敛疮生肌
丁香油		大热						甘	辛								胃			脾		肾		暖胃，降逆，温肾，止痛
羚羊角粉	寒									咸			心								肝			平肝熄风，清肝明目，清热解毒
竹叶柴胡	微寒						苦				肺							胆			肝			解表和里，升阳，疏肝解瘀
清半夏			温						辛								胃			脾			有毒	燥湿化痰，降逆止呕，消痞散结
鹿角			温							咸											肝	肾		温肾阳，强筋骨，行血消肿
鹿角霜			温							咸											肝	肾		温肾助阳，收敛止血
蚕砂			温					甘									胃			脾	肝			燥湿、祛风、和胃化浊、活血定痛
橘红			温				苦		辛		肺									脾				理气宽中，燥湿化痰
银朱			温						辛		肺		心										有毒	攻毒，杀虫，燥湿，祛痰
铁棒锤		大热					苦		辛		肺		心										大毒	活血祛瘀，驱风除湿，止痛消肿
水牛角浓缩粉	寒						苦						心								肝			清热解毒，凉血，定惊
半夏曲					平				辛		肺			大肠						脾			有毒	化痰止咳，消食宽中
碱花					平			甘		咸							胃						小毒	消积，祛瘀，除虫，润肠
千金子霜			温						辛					大肠							肝	肾	有毒	泻下逐水，破血消癥
大红袍			温				微苦						心								肝			调经活血，止痛，收敛
黑冰片			温				苦		辛															清希拉，消食，杀粘，破痞
沙棘膏					平	酸																		清热止咳，活血化瘀，愈溃疡
蒲桃					平			甘						大肠										凉血，收敛
芒果核					平	酸										小肠	胃							健胃消食，化痰行气
山矾叶					平	酸		微甘			肺						胃							清热解毒，收敛止血
瓜蒌子	寒							甘			肺			大肠			胃							润肺化痰，滑肠通便
醋五味子			温			酸		甘			肺		心									肾		收敛固涩，益气生津，补肾宁心
天门冬	寒						苦	甘			肺											肾		滋阴润燥，清肺降火
蛤壳	寒									咸	肺						胃					肾		清肺化痰，软坚散结，利尿，制酸
关木通	寒						苦						心			小肠			膀胱				有毒	清心火，利小便，通经下乳
槐米	微寒						苦							大肠							肝			凉血止血，清肝泻火
旋复花			温							咸	肺						胃				肝		小毒	消痰，下气，软坚，行水
马钱子粉			温				苦													脾	肝		大毒	通络止痛，散结消肿
芙蓉叶				凉					微辛		肺										肝			清肺凉血，消肿排脓
铁筷子				凉			苦				肺										肝		小毒	清热解毒，活血散瘀，消肿止痛
甜叶菊					平			甘			肺						胃							生津止渴，降血压
炒麦芽					平			甘									胃			脾				行气消食，健脾开胃，退乳消胀
硝石			温				苦			咸	肺		心							脾			有毒	攻毒消肿，利水泻下，破坚散积
牛胆粉	大寒						苦				肺							胆			肝			清肝明目，利胆通肠，解毒消肿
醋延胡索			温				苦		辛				心				胃				肝			活血，行气，止痛
黑老虎根			温				微苦		辛											脾	肝			行气散瘀，通络止痛
西瓜霜	寒									咸	肺			大肠			胃							清热泻火，消肿止痛
香墨					平		苦																	止血，消肿
防已	寒						苦		辛		肺								膀胱					祛风止痛，利水消肿
广防已	大寒						苦		辛		肺								膀胱					祛风止痛，清热利水
桂子			温					甘	辛								胃							温中，和胃
白果仁					平		苦	甘			肺												有毒	敛肺气，定喘嗽，止带浊，缩小便
紫荆皮					平		苦														肝			活血，通淋，解毒
方海	寒									咸							胃				肝			清除火热，解除毒邪，利水渗湿
猪胆汁	寒						苦			咸	肺		心					胆			肝			益肺，补脾，润燥
葫芦巴			温				苦															肾		温肾，祛寒，止痛
钻地风				凉																脾				舒筋活络，祛风活血
食盐	寒									咸				大肠		小肠	胃					肾		涌吐，清火，凉血，解毒
熊胆粉							苦						心					胆			肝			清热解毒，息风止痉，清肝明目
北败酱	微寒						苦							大肠			胃				肝			清热燥湿，消肿排脓，凉血止血，化瘀解毒
炒僵蚕					平				辛	咸	肺						胃				肝			祛风解痉，化痰散结
生马钱子			温				苦													脾	肝		大毒	通络止痛，散结消肿
制远志			温				苦		辛		肺		心									肾		养心安神，益智，祛痰，消肿
煅牡蛎	微寒									咸											肝	肾		收敛固涩，制酸止痛，重镇安神，软坚散结
过岗龙					平		苦		辛												肝			祛风除湿，活血止痛
北寒水石	寒								辛	咸			心				胃					肾		清热降火，利窍，消肿
炒莱菔子					平			甘	辛		肺						胃			脾				消食除胀，降气化痰
珍珠粉	寒							甘		咸			心								肝			安神定惊，清肝明目，解毒生肌
地榆炭	微寒					酸	苦							大肠							肝			凉血止血，解毒敛疮
醋香附					平		微苦	微甘	辛						三焦					脾	肝			理气解郁，止痛调经
姜厚朴			温				苦		辛		肺			大肠			胃			脾				宽中理气，化湿开郁，消积平喘
盐杜仲			温					甘													肝	肾		补肝肾，强筋骨，安胎
酒当归			温					甘	辛				心								肝			补血活血，调经止痛，润肠通便
醋三棱					平		苦													脾	肝			破血行气，消积止痛
炒鸡内金					平			甘								小肠	胃		膀胱	脾				健胃消食，涩精止遗
炒白芍			温				苦	甘									胃			脾				养血调经，平肝止痛，敛阴止汗
醋龟甲	微寒							甘		咸			心								肝	肾		滋阴抑阳，益肾健骨，固经止血，养血补心
酒大黄	寒						苦						心	大肠			胃			脾	肝			清上焦，血分热毒
麸炒枳壳			温			酸	苦		辛								胃			脾				理气宽中，行滞消胀
五爪龙					平		微苦	甘			肺									脾				祛风除湿，祛瘀消肿
兰香草			温						辛		肺									脾		肾		疏风解表，祛寒除湿，散瘀止痛
无患子	寒						苦		辛		肺		心										小毒	清热祛痰，消积杀虫
四方藤					平		微苦		辛												肝			祛风除湿，活血通络
七星剑			微温						辛											脾	肝			发汗解暑，利湿解毒
葛花				凉				甘									胃			脾				解酒醒脾，止血
披麻草			温						辛														大毒	催吐，撑骨，祛瘀，止血，止痛，通窍
丁香叶			温						辛		肺						胃			脾		肾		暖胃养胃，散寒止痛
赛北紫堇	寒						苦																	活血散瘀，行气止痛，清热解毒
夜明砂	寒								辛												肝			清肝明目，散瘀消积
炒蔓荆子	微寒						苦		辛								胃		膀胱		肝			疏散风热，清利头目
鱼脑石	寒							甘		咸									膀胱					利尿通淋，清热解毒
扁豆					平			甘									胃			脾				健脾和中，消暑化湿
干山药					平			甘			肺									脾		肾		健脾，补肺，固肾，益精
獭肝			温					甘		咸	肺										肝	肾		益肺，补肝肾，明目，止血
糯米			温					甘			肺						胃			脾				补中益气，健脾止泻，缩尿，剑汗，解毒
制香附					平		微苦	甘	辛						三焦					脾	肝			疏肝理气，调经止痛
生甘草					平			甘			肺						胃			脾				补气健脾，祛痰止咳，缓急止痛，清热解毒，调和药性，补气健脾
炒牛蒡子	寒						苦		辛		肺						胃							解毒透疹，利咽散结，化痰止咳
芫荽			温						辛		肺						胃							发表透疹，健胃
炒葶苈子	大寒						苦		辛		肺								膀胱					泻肺平喘，行水消肿
丹皮	微寒						苦		辛				心								肝	肾		清热凉血，和血消瘀
陈仓米					平			甘					心	大肠			胃			脾				养胃，渗湿，除烦
熟附子		热						甘					心							脾		肾	有毒	回阳救逆，补火助阳，散寒除湿
酒白芍	微寒					酸	苦													脾	肝			养血柔肝，缓中止痛，敛阴收汗
炒苍术			温				苦		辛								胃			脾	肝			燥湿健脾，祛风散寒，明目
烫骨碎补			温				苦														肝	肾		补肾强骨，续伤止痛
麸炒枳实	微寒					酸	苦		辛					大肠			胃			脾				破气消积，化痰除痞
元参	微寒						苦	甘			肺						胃					肾		凉血滋阴，泻火解毒
醋商陆	寒						苦												膀胱	脾			有毒	['逐水','消肿','通利','二便','解毒','散结']
紫大戟	寒						苦				肺									脾		肾	有毒	泻水遂饮，消肿散结
生大黄	寒						苦							大肠			胃			脾	肝			攻积滞，清湿热，泻火，凉血，祛瘀，解毒
炒蒺藜			微温				苦		辛												肝		小毒	平肝解郁，活血祛风，明目，止痒
人中黄	寒							甘		咸			心				胃							清热凉血，泻火解毒
甘草节			温	凉				甘					心				胃			脾				解毒，利咽，和中
淡豆豉	寒						苦				肺						胃							解表，除烦，宣郁，解毒
甘草梢	寒							甘					心			小肠			膀胱					泻火解毒，利尿通淋
掌叶大黄	寒						苦							大肠			胃				肝			泻下导滞，泻火凉血，行瘀破积，清热解毒
盐附子		热						甘					心							脾		肾	有毒	回阳救逆，补火助阳，散寒除湿
醋鳖甲	寒									咸											肝	肾		滋阴潜阳，软坚散结
鲤鱼	寒				平			甘									胃	胆		脾		肾		健脾和胃，利水下气，通乳，安胎
杜衡			温						辛												肝	肾	小毒	祛风散寒，消痰行水，活血止痛，解毒
羊肉		热						甘									胃			脾		肾		温中暖肾，益气补虚
黑枣			温					甘			肺						胃							补中益气，养血，安神，明目
鹿胶			温					甘		咸											肝	肾		补血，益精
鼠妇虫			温			酸				咸											肝	肾		破血瘀，消癥瘕，止痛，利尿，解毒
荷叶炭					平		苦				肺		心					胆		脾	肝			清热解暑，升发清阳，凉血止血
制白附子			温						辛								胃				肝		有毒	祛风痰，定惊搐，解毒散结止痛
蝎尾					平				辛												肝		有毒	息风镇痉，攻毒散结，通络止痛
胡麻仁					平			甘			肺									脾	肝	肾		润燥滑肠，滋养肝肾
绿豆皮	寒							甘			肺										肝			解热毒，退目翳
油柑木皮	寒					酸		甘					心								肝			杀菌去腐，止血
桑芽	寒						微苦	微甘													肝			清肝明目
紫金皮			温				苦													脾		肾	大毒	续筋接骨，祛风除湿
黄岑	寒						苦				肺			大肠		小肠		胆		脾				清热燥湿，泻火解毒，止血，安胎
鳖甲胶	微寒							甘		咸	肺										肝	肾		滋阴，补血，退热，消瘀
稀莶草	寒						苦		辛												肝	肾		祛风湿，利筋骨，降血压
龟板					平			甘		咸			心								肝	肾		滋阴潜阳，补肾健骨，养心安神
香排草					平			甘																祛风除湿，行气止痛，调经，解毒
丢了棒					平		微苦		辛											脾		肾		祛风除湿，消肿止痛
猪腰子					平			甘		咸												肾		补肾，强腰，益气
胎盘粉			温					甘		咸	肺										肝	肾		补气，养血，温肾益精
桂心		热						甘	辛										膀胱	脾		肾		补元阳，暖脾胃，除积冷，通血脉
梨				凉		微酸		甘			肺						胃							生津，润燥，清热，化痰
鹿肉			温					甘												脾		肾		益气助阳，养血祛风
没食子			温				苦				肺									脾		肾		涩肠，固精，止咳，止血，敛疮
红枣			温					甘									胃			脾				补中益气，养血安神
巨胜子			微温				苦		辛												肝	肾		益肝肾，活血，乌须发
葡萄					平	酸		甘			肺									脾		肾		补气血，强筋骨，利小便
秋石	寒									咸	肺											肾		滋阴降火，止血消瘀
针砂	微寒					酸			辛	咸				大肠						脾	肝			镇心平肝，健脾消积，补血，利湿，消肿
五谷虫	寒									咸	肺									脾				清热，消滞
牛骨髄			温					甘					心							脾				润肺止血，补血益精，补肾填髓
鹿蹄草			温				苦	甘													肝	肾		补虚，益肾，祛风除湿，活血调经
西砂仁			温						辛								胃			脾				化湿行气，行气安胎，温中止泻，温肾下气，化骨哽
鲍鱼					平			甘		咸											肝			养血，柔肝，滋阴，清热，益精，明目
雀卵			温			酸		甘														肾		补肾阳，益精血，调冲任
莽草			温						辛														有毒	祛风止痛，消肿散结，杀虫止痒
牛乳	微寒							甘			肺		心				胃							补虚损，益肺胃，养血，生津润燥，解毒
鹿尾			温					甘		咸											肝	肾		暖腰膝，益肾精
石燕				凉				甘		咸									膀胱			肾		除湿热，利小便，退目翳
羊肝				凉			苦	甘													肝			养血，补肝，明目
麻雀脑					平			甘														肾		补肾兴阳，润肤生肌
荸荠	寒							甘			肺						胃							清热生津，化痰，消积

## Sheet: Sheet2
中药名	寒	热	温	凉	平	酸	苦	甘	辛	咸	肺	心包	心	大肠	三焦	小肠	胃	胆	膀胱	脾	肝	肾	毒性	功效	剂量范围	所属大类	所属小类
阿胶					平			甘			肺										肝	肾		['补血','滋阴','润燥','止血']	3～9g	补虚药	补血药
阿魏			温				苦		辛								胃			脾				['消积','化瘕','散痞','杀虫']	1～1.5g	其他	理气药
矮地茶					平		苦		辛		肺										肝			['镇咳','祛痰','活血','利尿','解毒']	9～12g	化痰止咳平喘	止咳平喘药
艾叶			温				苦		辛											脾	肝	肾		['散寒','止痛','温经','止血']	3～9g	止血药	温经止血药
艾叶炒焦			温				苦		辛											脾	肝	肾	小毒	['温经','止血','散寒','止痛','祛湿','止痒']	3～9g	止血药	温经止血药
安息香					平		苦		辛				心							脾				['开窍','清神','行气','活血','止痛']	0.6～1.5g	其他	开窍药
八角枫			温				苦		辛				心								肝		有毒	['祛风','除湿','舒筋','活络','散瘀','止痛']	1.5～3g	活血化瘀药	活血止痛药
八角茴香			温						辛								胃			脾	肝	肾		['温阳','散寒','理气','止痛']	3～6g	其他	温里药
八角莲				凉			苦		辛		肺										肝		有毒	['化痰','散结','祛瘀','止痛','清热','解毒']	3～12g	其他	拔毒生肌药
八楞木					平		苦		辛												肝			['祛风','除湿','散瘀','止痛']	9～18g	活血化瘀药	活血止痛药
八月札	寒						苦						心			小肠			膀胱					['利尿','通淋','清心','除烦','通经','下乳']	3～6g	利水渗湿药	利尿通淋药
巴豆		热							辛					大肠			胃						大毒	['泻寒积','通关窍','逐痰','行水','杀虫']	0.1～0.3g	泻下药	峻下逐水药
巴戟天			微温					甘	辛												肝	肾		['补肾阳','强筋骨','祛风湿']	6～15g	补虚药	补阳药
巴戟天肉			微温					甘	辛												肝	肾		['补肾阳','强筋骨','祛风湿']	3～10g	补虚药	补阳药
菝葜					平	酸		甘													肝	肾		['祛风湿','利小便','消肿毒']	9～15g	利水渗湿药	利尿通淋药
白背叶根					平		微苦														肝			['清热','利湿','益气','固脱','疏肝','活血']	15~30g	清热药	清热燥湿药
白扁豆			微温					甘									胃			脾				['健脾','化湿','和中','消暑']	9～15g	补虚药	补气药
白豆蔻			温						辛		肺						胃			脾				['化湿','行气','温中','止呕','开胃','消食']	3～6g	其他	化湿药
白矾	寒					酸					肺			大肠					膀胱	脾	肝		有毒	['祛痰','燥湿','解毒','杀虫','止血','止泻','解毒','杀虫','燥湿','止痒']	1~3g	清热药	清热燥湿药
白附子			温						辛								胃				肝		有毒	['祛风痰','定惊搐','解毒','散结','止痛']	3～6g	化痰止咳平喘药	温化寒痰药
白膏	寒							甘	辛		肺									脾		肾	有毒	['杀虫','消积','解毒','生肌','燥湿','止痒']	0.9～1.5g	其他	攻毒杀虫止痒药
白果					平		苦	甘			肺											肾	有毒	['敛肺','定喘','止带浊','缩小便']	4.5～9g	收涩药	固精缩尿止带药
白鹤灵芝					平			甘			肺													['清肺','止咳','利湿','止痒']	3～6g	其他	杀虫止痒药
白花丹			温				苦		辛														有毒	['祛风','除湿','行气','活血','解毒','消肿']	9～15g	活血化瘀药	活血止痛药
白花蛇舌草				凉			微苦	微甘						大肠		小肠	胃							['清热','利湿','解毒','抗癌']	50～100g	清热药	清热解毒药
白花银背藤			温																					['补气血','止咳','驳骨','止血','生肌']	20～50g	止血药	收敛止血药
白及	微寒						苦	甘			肺						胃				肝			['收敛','止血','消肿','生肌']	6～15g	止血药	收敛止血药
白芥子			温						辛		肺						胃							['利气','燥痰','散结','消肿']	3～10g	利水渗湿药	利水消肿药
白兰花			温				苦		辛		肺						胃							['止咳','化浊']	10～15g	化痰止咳平喘药	止咳平喘药
白蔹	微寒						苦						心				胃							['清热','解毒','消痈','散结']	4.5～9g	清热药	清热解毒药
白马骨				凉			苦		微辛											脾	肝			['疏风','清热','利湿','解毒']	10~15g	清热药	清热解毒药
白毛藤	寒						苦	甘													肝			['请热','利湿','祛风','解毒']	25～40g	清热药	清热解毒药
白茅根	寒							甘			肺						胃		膀胱					['凉血','止血','清热','利尿']	9～30g	止血药	凉血止血药
白茅花			温					甘													肝			['止血','定痛','清热','利尿']	9～30g	止血药	凉血止血药
白前			微温				苦		辛		肺													['降气','消痰','止咳']	3～9g	化痰止咳平喘药	止咳平喘药
白屈菜			温				苦		辛		肺						胃							['破瘀','止血','解痉','止痛','止咳','平喘']	9~18g	化痰止咳平喘药	止咳平喘药
白芍	微寒					酸	苦													脾	肝			['平肝','止痛','养血','调经','敛阴','止汗']	4.5～9g	补虚药	补血药
白石花				凉				甘													肝			['明目','凉血','解毒']	3～9g	止血药	凉血止血药
白石英			微温					甘	辛		肺		心									肾		['温肺肾','安心神','利小便']	10～15g	安神药	重镇安神药
白石脂					平	酸					肺			大肠										['涩肠','止血','固脱','收湿','敛疮']	9～12g	收涩药	固肠止泻药
白首乌					平		微苦	甘									胃			脾	肝	肾		['补肝肾','强筋骨','益精血','健脾','消食','解毒','疗疮']	6～15g	补虚药	补血药
白术			温				苦	甘									胃			脾				['健脾','益气','燥湿','利水','止汗','安胎']	6~12g	补虚药	补气药
白苏子			温						辛		肺			大肠										['下气','消痰','润肠','通便']	5～10g	泻下药	润下药
白头翁	寒						苦							大肠			胃							['清热','解毒','凉血','止痢']	10～15g	清热药	清热凉血药
白薇	寒						苦			咸							胃				肝	肾		['清热','凉血','利尿']	4.5～9g	清热药	清热凉血药
白鲜皮	寒						苦										胃			脾				['清热','燥湿','祛风','解毒']	4.5～9g	清热药	清热燥湿药
白药子				凉			苦		辛		肺						胃						有毒	['清热','解毒','祛风','止痛','凉血','止血']	9～15g	清热药	清热解毒药
白英	寒						苦	甘										胆			肝	肾		['清热','利湿','祛风','解毒']	15～30g	祛风湿药	祛风湿清热药
白芷			温						辛		肺			大肠			胃							['散风','除湿','通窍','止痛','消肿','排脓']	3～9g	解表药	辛温解表药
百部			微温				苦	甘			肺													['润肺','止咳','杀虫','灭虱']	3～9g	化痰止咳平喘药	止咳平喘药
百合	寒							甘			肺		心											['养阴','润肺','清心','安神']	6～12g	补虚药	补阴药
柏子仁					平			甘					心	大肠								肾		['养心','安神','止汗','润肠']	3~9g	安神药	养心安神药
败酱					平		苦							大肠			胃				肝			['清热','解毒','消痈','排脓','祛瘀','止痛']	6-15g	清热药	清热解毒药
败酱草				凉			苦		辛					大肠			胃				肝			['清热','解毒','祛瘀','排脓']	9～15g	清热药	清热解毒药
斑蝥		热							辛								胃				肝	肾	大毒	['破血','消癥','攻毒','蚀疮','引赤','发泡']	0.03～0.06g	活血化瘀药	破血消癥药
板蓝根	寒						苦						心				胃							['清热','解毒','凉血','利咽']	9～15g	清热药	清热解毒药
半边莲					平				辛		肺		心			小肠								['利尿','消肿','清热','解毒']	9～15g	清热药	清热解毒药
半枫荷			温					甘												脾	肝			['祛风','除湿','活血','消肿']	30~60g	祛风湿药	祛风湿散寒药
半夏			温						辛		肺						胃			脾			有毒	['燥湿','化痰','降逆','止呕','消痞','散结']	3～9g	清热药	清热燥湿药
半枝莲	寒						苦		辛		肺										肝	肾		['清热','解毒','活血','化瘀','利尿']	15～30g	清热药	清热解毒药
薄荷				凉					辛		肺										肝			['宣散','风热','清头目','透疹']	3～6g	解表药	辛凉解表药
暴马丁香	微寒						苦				肺													['清肺','祛痰','止咳','平喘','利水']	25～50g	化痰止咳平喘药	清化热痰药
北豆根	寒						苦				肺			大肠			胃						有毒	['清热','解毒','消肿','止痛']	6～9g	清热药	清热解毒药
北刘寄奴	寒						苦										胃	胆		脾	肝			['活血','祛瘀','通经','止痛','凉血','止血','清热','利湿']	9～15g	活血化瘀药	活血调经药
北沙参	微寒						微苦	甘			肺						胃							['养阴','清肺','益胃','生津']	4.5～9g	补虚药	补阴药
荜茇		热							辛					大肠			胃							['温中','散寒','下气','止痛']	1.5～3g	其他	温里药
荜澄茄			温						辛								胃		膀胱	脾		肾		['温中','散寒','行气','止痛']	1.5～3g	其他	温里药
萆薢					平		苦										胃					肾		['利湿','去浊','祛风','除痹']	9~15g	利水渗湿药	利尿通淋药
蓖麻子					平			甘	辛		肺			大肠										['消肿','拔毒','泻下','通滞']	2～5g	泻下药	润下药
萹蓄	微寒						苦												膀胱					['利尿','通淋','杀虫','止痒']	9~15g	利水渗湿药	利尿通淋药
扁蓄	微寒						苦												膀胱					['利尿','通淋','杀虫','止痒']	9～15g	利水渗湿药	利尿通淋药
鳖甲	微寒									咸											肝	肾		['滋阴','潜阳','软坚','散结','退热','除蒸']	9～24g	补虚药	补阴药
槟榔			温				苦		辛					大肠			胃							['驱虫','消积','下气','行水']	3～9g	其他	驱虫药
冰片	寒						苦		辛		肺		心							脾				['开窍','醒神','清热','止痛']	0.03～0.1g	其他	开窍药
卜芥	寒						微苦																大毒	['清热','解毒','散结','止痛']	3～9g	清热药	清热解毒药
补骨脂			温				苦		辛											脾		肾		['温肾','助阳','纳气','止泻']	3～10g	补虚药	补阳药
布渣叶	微寒							甘									胃			脾				['清热','消滞','利湿','退黄']	10~15g	清热药	清热泻火药
参三七			温				微苦	甘									胃				肝			['散瘀','止血','消肿','定痛']	3～9g	止血药	化淤止血药
蚕沙			温					甘	辛								胃			脾	肝			['祛风','除湿','和胃','化浊']	10～15g	祛风湿药	祛风湿强筋骨药
苍耳草	微寒						苦		辛														小毒	['祛风','清热','解毒']	6-15g	解表药	发散风寒药
苍耳子			温				苦		辛		肺												有毒	['散风湿','通鼻窍','杀虫']	3～9g	解表药	辛温解表药
苍术			温				苦		辛								胃			脾	肝			['燥湿','健脾','祛风','散寒','明目']	3～10g	其他	化湿药
藏菖蒲			温				苦		辛				心				胃				肝			['温胃','消炎','止痛']	3～6g	其他	消食药
草豆蔻			温						辛								胃			脾				['燥湿','行气','温中','止呕']	3~6g	化湿药	祛风湿强筋骨药
草果			温						辛								胃			脾				['燥湿','温中','除痰','截疟']	3～6g	其他	化湿药
草决明	微寒						苦	甘		咸				大肠							肝			['清肝','明目','润肠','通便']	9～15g	清热药	清热泻火药
草乌		热					苦		辛				心							脾	肝	肾	大毒	['祛风','除湿','散寒','止痛']	1.5～3g	祛风湿药	祛风湿散寒药
草乌叶					平				辛														有毒	['清热','解毒','止痛']	1～1.2g	清热药	清热解毒药
侧柏叶	寒						苦				肺									脾	肝			['凉血','止血','生发','乌发']	6～12g	止血药	凉血止血药
侧柏叶炭	寒						苦				肺									脾	肝			['凉血','止血','化痰','止咳','生发','乌发']	6～12g	止血药	凉血止血药
柴胡	微寒						苦				肺							胆			肝			['和解','表里','疏肝','升阳']	3～9g	解表药	辛凉解表药
蝉花	寒							甘													肝			['清热','祛风','镇惊','明目','退翳','透疹']	3~6g	平肝息风药	平抑肝阳药
蝉蜕	寒							甘			肺										肝			['散风','除热','利咽','透疹','解痉','退翳']	3~6g	解表药	辛凉解表药
蟾皮				凉			苦				肺		心	大肠						脾			有毒	['清热','解毒','利水','消肿']	3～9g	清热药	清热解毒药
蟾酥			温						辛				心											['解毒','止痛','开窍','醒神']	0.015～0.03g	其他	开窍药
菖蒲			温				苦		辛				心				胃							['开窍','豁痰','醒神','益智','化湿','开胃']	3～10g	其他	开窍药
常山	寒						苦		辛		肺		心								肝		有毒	['截疟','涌吐','劫痰']	5～9g	其他	涌吐药
车前草	寒							甘			肺					小肠					肝	肾		['清热','利尿','祛痰','凉血','解毒']	9～30g	利水渗湿药	利尿通淋药
车前子	微寒							甘			肺					小肠					肝	肾		['清热','利尿','渗湿','通淋','明目','祛痰']	9～15g	利水渗湿药	利尿通淋药
沉香			微温				苦		辛								胃			脾		肾		['行气','止痛','温中','止呕','纳气','平喘']	1.5～4.5g	其他	理气药
陈皮			温				苦		辛		肺									脾				['理气','开胃','燥湿','化痰','治脾','胃病']	3～9g	其他	理气药
柽柳					平				辛		肺		心				胃							['发表','透疹','祛风','除湿']	3~10g	解表药	发散风寒药
赤茯苓					平			甘					心						膀胱	脾				['行水','利湿热']	6-12g	利水渗湿药	利水消肿药
赤芍	微寒						苦													脾	肝			['清热','凉血','散瘀','止痛']	6～12g	清热药	清热凉血药
赤石脂			温			酸		甘						大肠			胃							['涩肠','止血','生肌','敛疮']	9～12g	收涩药	敛肺涩肠药
赤小豆					平	酸		甘					心			小肠								['利水','消肿','解毒','排脓']	9～30g	利水渗湿药	利水消肿药
赤小豆皮					平	酸		甘					心			小肠								['解毒','排脓','利水','消肿']	9～30g	清热药	清热解毒药
茺蔚子	微寒							甘	辛			心包	心								肝			['活血','调经','清肝','明目']	5～10g	活血化瘀药	活血调经药
虫白蜡			温					甘													肝			['止血','生肌','定痛']	3～6g	止血药	收敛止血药
虫牙药				凉			苦		微辛		肺										肝			['清热','利湿','解毒','止血']	15～30g	活血化瘀药	活血止痛药
臭灵丹草				凉			苦		辛		肺						胃							['清热','解毒','止咳','祛痰']	9～15g	清热药	清热解毒药
臭牡丹					平		苦		辛				心	大肠			胃							['祛风','除湿','平肝','潜阳','消肿','解毒']	10～15g	清热药	清热解毒药
臭梧桐					平		苦	甘						大肠			胃							['祛风','除湿','平肝','降压','解毒','杀虫']	10～15g	祛风湿药	祛风湿强筋骨药
杵头糠					平			甘						大肠			胃							['安神']	9～30g	安神药	养心安神药
楮实	寒							甘												脾	肝	肾		['滋肾','清肝','明目','健脾','利水']	6～10g	补虚药	补阴药
楮实子	寒							甘													肝	肾		['补肾','清肝','明目','利尿']	6～12g	补虚药	补气药
川贝母	微寒						苦	甘			肺		心											['清热','润肺','化痰','止咳']	6~10g	其他	清化热痰药
川断			微温				苦		辛												肝	肾		['补肝肾','强筋骨','续折伤','止崩漏']	9～15g	补益药	补阳药
川连	寒						苦						心	大肠			胃	胆		脾	肝			['清热','燥湿','泻火','解毒']	2～5g	清热药	清热燥湿药
川楝子	寒						苦									小肠			膀胱		肝		有毒	['舒肝','行气','止痛','驱虫']	4.5～9g	其他	理气药
川木通	寒						苦						心			小肠			膀胱					['清热','利尿','通经','下乳']	3～6g	利水渗湿药	利尿通淋药
川木香			温				苦		辛					大肠			胃	胆		脾				['行气','止痛']	1.5～9g	其他	理气药
川牛膝					平		微苦	甘													肝	肾		['逐瘀','通经','通利','关节','利尿','通淋']	5~10g	活血化瘀药	活血调经药
川朴			温				苦		辛		肺			大肠			胃			脾				['燥湿','消痰','下气','除满']	3～10g	其他	化湿药
川射干	寒						苦				肺													['清热','解毒','消痰','利咽']	6~10g	清热药	清热解毒药
川乌		热					苦		辛				心							脾	肝	肾	大毒	['祛风','除湿','温经','止痛']	3～9g	祛风湿药	祛风湿散寒药
川芎			温						辛			心包	心					胆			肝			['活血','行气','祛风','止痛']	3～10g	活血化瘀药	活血止痛药
川续断			微温				苦		辛												肝	肾		['补肝肾','强筋骨','续折断','止崩漏']	9～15g	补虚药	补阳药
穿破石				凉			微苦						心								肝			['祛风','通络','清热','除湿','解毒','消肿']	9～30g	祛风湿药	祛风湿清热药
穿山甲	微寒									咸							胃				肝			['通经','下乳','消肿','排脓','搜风','通络']	5～9g	活血化瘀药	活血调经药
穿山龙			温				苦	甘			肺										肝	肾		['活血','舒筋','祛风','止痛','止咳','平喘','祛痰']	9～15g	祛风湿药	祛风湿强筋骨药
穿心莲	寒						苦				肺						胃				肝			['清热','解毒','凉血','消肿']	6～9g	清热药	清热解毒药
垂盆草				凉				甘								小肠		胆			肝			['清利','湿热','解毒']	15～30g	利水渗湿药	利湿退黄药
春不见	微寒						苦	甘													肝			['清热','解毒','祛风','定惊']	6～9g	清热药	清热解毒药
椿根白皮	寒						苦							大肠			胃				肝			['清热','燥湿','收涩','止带','止泻','止血']	6～9g	收涩药	固精缩尿止带药
椿皮	寒						苦							大肠			胃				肝			['清热','燥湿','收涩','止带','止泻','止血']	6～9g	清热药	清热燥湿药
鈶糖			温					甘			肺						胃			脾				['补中','益气','缓急','止痛','润肺','止咳']	---	补虚药	补气药
磁石					平					咸											肝	肾		['平肝','潜阳','聪耳','明目','镇惊','安神','纳气','平喘']	9～30g	安神药	重镇安神药
刺蒺藜			微温				苦		辛												肝		小毒	['平肝','疏肝','祛风','明目']	6~9g	平肝息风药	平抑肝阳药
刺猬皮					平		苦							大肠			胃							['降气','止痛','止血','涩精']	3～10g	其他	理气药
刺五加			温				微苦		辛				心							脾		肾		['益气','健脾','补肾','安神']	9～27g	补虚药	补气药
刺苋菜				凉				甘						大肠			胃			脾				['清热','利湿','解毒','消肿','凉血','止血']	15~60g	止血药	凉血止血药
葱白			温						辛		肺						胃							['发表','通阳','解毒','杀虫']	9～15g	解表药	辛温解表药
葱子			温						辛		肺						胃				肝			['温肾','明目','解毒']	6～12g	补虚药	补阳药
楤木					平		微苦	甘												脾	肝	肾		['祛风湿','利小便','散瘀血','消肿毒']	15~30g	祛风湿药	祛风湿强筋骨药
翠云草				凉				甘			肺			大肠							肝			['清热','利湿','解毒','祛瘀','止血','止咳']	15～30g	清热药	清热解毒药
大驳骨					平		苦		辛											脾	肝			['活血','止痛','化瘀','接骨','祛风','除湿','消肿','解毒']	9～15g	活血化瘀药	活血疗伤药
大豆黄卷					平			甘			肺						胃			脾				['透邪','解表','利湿','解热']	9～15g	解表药	辛凉解表药
大豆卷					平			甘			肺						胃			脾				['解表','祛暑','清热','利湿']	9～15g	解表药	发散风热药
大飞扬草	寒					酸			辛		肺										肝			['清热','解毒','通乳','渗湿','止痒']	6～9g	清热药	清热解毒药
大风艾			温				苦		辛		肺						胃				肝			['温中','活血','调经','祛风','除湿','杀虫']	10~20g	祛风湿药	祛风湿散寒药
大风子		热							辛											脾	肝	肾	大毒	['祛风','燥湿','攻毒','杀虫']	0.3～1g	其他	杀虫止痒药
大腹皮			微温						辛					大肠		小肠	胃			脾				['行气','宽中','行水','消肿']	6～12g	利水渗湿药	利水消肿药
大黄	寒						苦					心包	心	大肠			胃			脾	肝			['泻热','通便','凉血','解毒','逐瘀','通经']	3～30g	泻下药	攻下药
大黄酒	寒						苦					心包		大肠			胃			脾	肝			['泻下','攻积','清热','泻火','凉血','解毒','逐瘀','通经','利湿','退黄']	3-15g	泻下药	攻下药
大戟	寒						苦				肺									脾		肾		['泻水饮','利二便']	2～5g	泻下药	峻下逐水药
大蓟				凉			苦	甘					心								肝			['凉血','止血','祛瘀','消肿']	9～15g	止血药	凉血止血药
大青盐	寒									咸			心						膀胱			肾		['泻热','凉血','明目','润燥']	0.6～1g	清热药	清热泻火药
大青叶	寒						苦						心				胃							['清热','解毒','凉血','清斑']	10～15g	清热药	清热解毒药
大蒜			温						辛		肺						胃			脾				['行滞气','暖脾胃','消积','解毒','杀虫']	5～10g	其他	温里药
大血藤					平		苦							大肠							肝			['清热','解毒','活血','祛风','止痛']	5～15g	活血化瘀药	活血止痛药
大叶桉叶					平		苦		辛		肺		心	大肠										['清热','燥湿','抑菌','消炎']	15~25g	清热药	清热燥湿药
大叶紫珠					平		苦		辛		肺						胃				肝			['散瘀','止血','消肿','止痛']	15～30g	止血药	化瘀止血药
大枣			温					甘					心				胃			脾				['补中','益气','养血','安神']	6～15g	补虚药	补气药
代赭石	寒						苦						心								肝			['平肝','潜阳','重镇','降逆','凉血','止血']	10~30g	平肝息风药	平抑肝阳药
玳瑁	寒							甘		咸			心								肝			['平肝','定惊','清热','解毒']	9～15g	平肝息风药	息风止痉药
丹参	微寒						苦						心								肝			['祛瘀','止痛','活血','痛经','清心','除烦']	9～15g	活血化瘀药	活血调经药
单叶蔓荆子	微寒						苦		辛								胃		膀胱		肝			['疏散','风热','清利','头目']	5~9g	解表药	辛凉解表药
胆矾	寒					酸			辛									胆			肝			['涌吐','解毒','去腐']	0.3～0.6g	其他	涌吐药
胆南星				凉			苦		微辛		肺									脾	肝			['清热','化痰','息风','定惊']	3~6g	化痰止咳平喘药	清化热痰药
淡豆豉				凉			苦		辛		肺						胃							['解表','除烦','宣发','郁热']	6～12g	解表药	辛凉解表药
淡竹叶	寒							甘					心			小肠	胃							['清热','除烦','利尿']	6～9g	清热药	清热泻火药
当归			温					甘	辛				心							脾	肝			['补血','活血','调经','止痛','润肠','通便']	6～12g	补虚药	补血药
当药	寒						苦							大肠			胃				肝			['清湿热','健胃']	6～12g	清热药	清热燥湿药
党参					平			甘			肺									脾				['补中','益气','健脾','益肺']	9～30g	补虚药	补气药
刀豆			温					甘									胃					肾		['温中','下气','止呕']	4.5～9g	其他	温里药
倒扣草	寒							甘			肺								膀胱		肝			['解表','清热','利水','通淋','活血','散瘀']	9~15g	利水渗湿药	利尿通淋药
稻芽			温					甘									胃			脾				['和中','消食','健脾','开胃']	9～15g	其他	消食药
灯心草	微寒							甘			肺		心			小肠								['清心火','利小便']	1.5～3g	利水渗湿药	利尿通淋药
灯芯草	微寒							甘			肺		心			小肠								['清心火','利小便']	1～3g	清热药	清热泻火药
灯盏细辛			温				微苦		辛				心								肝			['活血','通络','止痛','祛风','散寒']	9～15g	解表药	辛温解表药
地鳖虫	寒									咸											肝		小毒	['活血','散瘀','通经','止痛']	3～9g	活血化瘀药	活血疗伤药
地不容	寒						苦				肺						胃				肝		有毒	['截疟','解疮毒']	1.5～3g	清热药	清热解毒药
地耳草				凉			微苦	甘						大肠				胆			肝			['清热','利湿','解毒','散瘀','消肿','止痛']	15～30g	清热药	清热燥湿药
地枫皮			温						微辛										膀胱			肾	有毒	['祛风','除湿','行气','止痛']	6～9g	祛风湿药	祛风湿强筋骨药
地肤子	寒						苦	甘											膀胱			肾		['清利','湿热','止痒']	9～15g	利水渗湿药	利尿通淋药
地骨皮	寒							甘			肺										肝	肾		['凉血','除蒸','清肺','降火']	9～15g	清热药	清热凉血药
地锦草					平		苦		辛					大肠							肝			['清热','解毒','凉血','止血']	9～20g	清热药	清热解毒药
地龙	寒									咸									膀胱	脾	肝			['清热','定惊','通络','平喘','利尿']	4.5～9g	平肝息风药	息风止痉药
地稔根					平	微酸					肺									脾	肝			['活血','通络','收敛','止血']	5~30g	止血药分类	收敛止血药
地桃花	微寒							甘			肺									脾				['清热','解毒','去湿','止痢','祛风','止痛']	30~60g	清热药	清热解毒药
地榆	微寒					酸	苦							大肠							肝			['凉血','止血','解毒','敛疮']	9～15g	止血药	凉血止血药
颠茄草							微苦		辛															['解痉','止痛']	---	平肝息风药	息风止痉药
丁公藤			温						辛								胃			脾	肝			['祛风','除湿','消肿','止痛']	3～6g	祛风湿药	祛风湿散寒药
丁香			温						辛								胃			脾		肾		['温中','降逆','补肾','助阳']	1～3g	其他	温里药
东风橘			微温				苦		辛		肺										肝			['祛风','解表','化痰','止咳','理气','止痛']	15~30g	解表药	发散风寒药
冬虫夏草					平			甘			肺											肾		['补肺','益肾','止血','化痰']	3～9g	补虚药	补阳药
冬瓜皮				凉				甘								小肠	胃							['清热','利尿','消肿']	10～30g	利水渗湿药	利水消肿药
冬瓜仁	微寒							甘			肺					小肠				脾				['清热','化痰','排脓','利湿']	10～15g	利水渗湿药	利水消肿药
冬瓜子	微寒							甘			肺					小肠				脾				['清热','化痰','排脓','利湿']	10～15g	利水渗湿药	利水消肿药
冬葵果				凉				甘						大肠		小肠			膀胱					['清热','利尿','消肿']	3～9g	利水渗湿药	利水消肿药
冬葵子	寒							甘						大肠		小肠			膀胱					['利水','通淋','滑肠','通乳']	6～15g	利水渗湿药	利尿通淋药
冬凌草	微寒						苦	甘			肺						胃				肝			['清热','解毒','活血','止痛']	30～60g	活血化瘀药	活血止痛药
豆豉姜			温				苦		辛								胃			脾	肝			['祛风','除湿','温中','散寒','行气','活血']	10~15g	祛风湿药	祛风湿散寒药
豆蔻			温						辛								胃			脾				['化湿','消痞','行气','温中','开胃','消食']	3～6g	其他	化湿药
独活			微温				苦		辛										膀胱			肾		['祛风','除湿','通痹','止痛']	3～9g	祛风湿药	祛风湿散寒药
独脚金					平			甘												脾	肝	肾		['平肝','消疳','健脾','消食','清热','利尿']	9~15g	清热药	清热泻火药
独一味					平		苦	甘													肝			['活血','止血','祛风','止痛']	2～3g	活血化瘀药	活血止痛药
杜仲			温					甘													肝	肾		['补肝肾','强筋骨','安胎']	6～9g	补虚药	补阳药
杜仲叶			温						微辛												肝	肾		['补肝肾','强筋骨']	15～30g	补虚药	补阳药
短茶风					平		微苦		辛		肺										肝			['化痰','止咳','清热','利湿','活血','化瘀']	15～30g	化痰止咳平喘药	止咳平喘药
短地茶					平		苦		辛		肺										肝			['止咳','平喘','清利','湿热','活血','化瘀']	9～12g	化痰药	止咳平喘药
断血流				凉			苦														肝			['收敛','止血']	9～15g	止血药	收敛止血药
莪术			温				苦		辛											脾	肝			['行气','破血','消积','止痛']	6～9g	于活血化瘀药	破血消癥药
峨参			微温					甘	辛		肺						胃			脾				['益气','健脾','活血','止痛']	9～15g	活血化瘀药	活血止痛药
鹅不食草			温						辛		肺										肝			['通鼻窍','止咳']	3～10g	解表药	辛温解表药
儿茶	微寒						苦				肺		心											['收湿','生肌','敛疮','止血']	1～3g	止血药	收敛止血药
番石榴叶					平			甘						大肠										['燥湿','健脾','清热','解毒','涩肠','止泻','收敛','止血']	9~15g	清热药	清热燥湿药
番泻叶	寒						苦	甘						大肠										['泻热','行滞','通便','利水']	2～6g	泻下药	润下药
翻白草					平		微苦	甘						大肠			胃				肝			['清热','解毒','止痢','止血']	10～15g	清热药	清热解毒药
矾石	寒					酸					肺			大肠						脾	肝			['解毒','杀虫','燥湿','止痒','止血','止泻','祛痰']	0.6～1.5g	其他	攻毒杀虫止痒药
方解石	寒						苦		辛															['清热','泻火','解毒']	10～30g	清热药	清热泻火药
防风			温					甘	辛										膀胱	脾	肝			['发表','祛风','除湿']	4.5～9g	解表药	辛温解表药
防风草			温				苦		辛															['祛风','除湿','解毒','止痛']	9~15g	解表药	辛温解表药
防己	寒						苦				肺								膀胱					['利水','消肿','祛风','止痛']	4.5～9g	祛风湿药	祛风湿清热药
飞滑石	寒							甘			肺						胃		膀胱					['利尿','通淋','清热','解暑','祛湿','敛疮']	10～20g	利水渗湿药	利尿通淋药
飞龙掌血			温				苦		辛								胃			脾				['祛风','止痛','散瘀','止血']	6～15g	止血药	化瘀止血药
飞天蠄蟧					平		苦																有毒	['清热','止咳','祛风','除湿']	15~30g	清热药	清热燥湿药
榧子					平			甘			肺			大肠			胃							['杀虫','消积','润肺','止咳','润燥','通便']	15～50g	其他	驱虫药
粉萆薢					平		苦										胃					肾		['利湿','去浊','祛风','除痹']	9～15g	利水渗湿药	利尿通淋药
粉草					平		苦														肝			['散瘀','止痛','收敛','止血']	6～12g	止血药	收敛止血药
粉丹皮	微寒						苦		辛				心								肝			['清热','凉血','活血','化瘀']	6～12g	清热药	清热凉血药
粉甘草					平						肺		心				胃			脾				['补脾','益气','清热','解毒','祛痰','止咳','缓急','止痛','调和诸药']	5～10g	补虚药	补气药
粉葛				凉				甘	辛								胃			脾				['解肌','退热','生津','透疹','升阳','止泻']	9~15g	解表药	辛凉解表药
枫香脂					平		微苦		辛		肺									脾				['活血','止痛','解毒','生肌','凉血']	1.5～3g	其他	拔毒生肌药
蜂房					平			甘									胃							['祛风','攻毒','杀虫','止痛']	3～5g	其他	杀虫止痒药
蜂蜜					平			甘			肺			大肠						脾				['补中','润燥','止痛','解毒']	15~30g	补虚药	补气药
凤凰衣					平			甘			肺						胃			脾				['养阴','清肺','敛疮','消翳','接骨']	3～9g	补虚药	补阴药
凤尾草	寒						微苦						心	大肠							肝			['清热','利湿','凉血','止血','消肿','解毒']	15~60g	清热药	清热解毒药
凤眼果					平			甘						大肠		小肠	胃							['和胃','消食','解毒','杀虫']	6～8枚	其他	消食药
佛甲草	寒							甘			肺		心							脾	肝			['清热','解毒']	10～15g	清热药	清热解毒药
佛手			温			酸	苦		辛		肺									脾	肝			['舒肝','理气','和胃','止痛']	3～9g	其他	理气药
伏龙肝			温						辛								胃			脾				['收敛','止血','温中','止呕','止泻']	15～30g	止血药	收敛止血药
扶芳藤			微温				微苦													脾	肝	肾		['益气血','补肝肾','舒筋','活络']	15～30g	祛风湿药	祛风湿强筋骨药
扶桑花	寒							甘			肺		心							脾	肝			['清肺','化痰','凉血','解毒']	15~30g	清热药	清热解毒药
茯苓					平			甘			肺		心							脾		肾		['利水','渗湿','健脾','宁心']	9～15g	利水渗湿药	利水消肿药
茯苓皮					平			甘			肺									脾		肾		['利水','消肿']	15～30g	利水渗湿药	利水消肿药
茯神					平			甘					心							脾				['宁心','安神','利水']	9～15g	安神药	养心安神药
浮萍	寒								辛		肺													['宣散','风热','透疹','利尿']	3～9g	解表药	辛凉解表药
浮小麦				凉				甘					心											['除虚热','止汗']	15～30g	收涩药	固表止汗药
附子		热						甘	辛				心							脾		肾	大毒	['回阳','救逆','补火','助阳','散寒','止痛']	3～15g	其他	温里药
覆盆子			温			酸		甘											膀胱			肾		['益肾','固精','缩尿']	6～12g	收涩药	固精缩尿止带药
甘草					平			甘			肺		心				胃			脾				['补脾','益气','止咳','祛痰','缓急','定痛','调和','药性']	2～6g	补虚药	补气药
甘菊花	微寒						苦	甘			肺										肝			['疏散风热','平抑肝阳','清肝','明目','清热','解毒']	5～10g	解表药	发散风热药
甘李根白皮	寒						苦			咸											肝			['清热','下气']	3～9g	清热药	清热泻火药
甘松			温					甘	辛								胃			脾				['理气','止痛','开郁','醒脾']	3～6g	其他	理气药
甘肃丹参	微寒						苦						心								肝			['祛瘀','止痛','活血','调经','养心','除烦','排脓','生肌']	9～15g	活血化瘀药	活血调经药
甘遂	寒						苦				肺			大肠								肾		['泻水','逐饮','消肿','散结']	0.5～1.5g	泻下药	峻下逐水药
干姜		热							辛		肺		心				胃			脾		肾		['温中','散寒','回阳','通脉','燥湿','消痰']	3～10g	其他	温里药
干漆			温						辛											脾	肝			['破瘀血','消积','杀虫']	2.5～4.5g	活血化瘀药	活血调经药
岗梅根				凉			苦	甘			肺			大肠							肝			['清热','解毒','生津','止渴','利咽','消肿','散瘀','止痛']	15-30g	清热药	清热解毒药
岗稔根					平			甘													肝	肾		['舒肝','通络','止痛']	15~30g	其他	理气药
杠板归	寒					酸					肺								膀胱					['清热','解毒','利咽','祛湿']	15～30g	清热药	清热解毒药
高良姜		热							辛								胃			脾				['温胃','止呕','散寒','止痛']	3～6g	其他	温里药
藁本			温						辛										膀胱					['散寒','除湿','止痛']	3～9g	解表药	辛温解表药
隔山消					平		苦	甘									胃			脾	肝			['消食','健胃','理气','止痛','催乳']	6~15g	其他	消食药
葛根				凉				甘	辛								胃			脾				['解肌','退热','生津','透疹','升阳','止泻']	9～15g	解表药	辛凉解表药
梗米					平			甘			肺						胃			脾				['补气','健脾','止泻','除烦','止渴']	9～30g	补虚药	补气药
功劳木	寒						苦							大肠			胃				肝			['清热','燥湿','泻火','解毒']	9～5g	清热药	清热燥湿药
钩藤				凉				甘				心包	心								肝			['清热','平肝','息风','定惊']	3～12g	平肝息风药	息风止痉药
狗肝菜				凉			微苦	甘			肺		心								肝			['清热','凉血','利尿','解毒']	50~100g	清热药	清热解毒药
狗脊			温				苦	甘													肝	肾		['补肝肾','强腰膝','祛风湿']	9～15g	祛风湿药	祛风湿强筋骨药
狗肾			温							咸												肾		['温肾','壮阳','补益','精髓']	3～9g	补虚药	补阳药
枸骨叶				凉			苦														肝	肾		['清热','养阴','平肝','益肾']	9～15g	平肝息风药	平抑肝阳药
枸杞子					平			甘													肝	肾		['滋补','肝肾','益精','明目']	6～12g	补虚药	补阴药
谷精草					平			甘	辛		肺										肝			['疏散','风热','明目','退翳']	4.5～9g	解表药	辛凉解表药
谷芽			温					甘									胃			脾				['消食','和中','健脾','开胃']	9～15g	其他	消食药
骨碎补			温				苦														肝	肾		['续伤','止痛','补肾','强骨']	3～10g	活血化瘀药	活血止痛药
瓜蒂	寒						苦										胃						有毒	['涌吐','痰食','祛湿','退黄']	2.5~5g	涌吐药	固精缩尿止带药
瓜蒌	寒						微苦	甘			肺			大肠			胃							['清热','涤痰','宽胸','散结','润燥','滑肠']	9～15g	化痰止咳平喘药	清化热痰药
瓜蒌皮	寒							甘			肺						胃							['清肺','化痰','利气','宽胸']	9～12g	化痰止咳平喘药	清化热痰药
瓜子金					平		苦		辛		肺													['祛痰','止咳','活血','消肿','解毒','止痛']	6～15g	活血化瘀药	活血止痛药
关黄柏	寒						苦												膀胱			肾		['清热','燥湿','泻火','除蒸','解毒','疗疮']	3～12g	清热药	清热燥湿药
官桂			温				苦		辛		肺		心						膀胱					['发汗','解肌','温经','通脉','助阳','化气','降逆','平冲']	3～10g	解表药	发散风寒药
贯叶金丝桃	寒								辛												肝			['疏肝','解郁','清热','利湿','消肿','通乳']	2～3g	利水渗湿药	利尿通淋药
贯众	微寒						苦										胃				肝			['清热','解毒','杀虫','止血']	5～15g	清热药	清热解毒药
广东海桐皮	微寒						微苦		辛												肝	肾		['祛风','祛湿','通经','活络','利水','消肿']	9~15g	祛风湿药	祛风湿强筋骨药
广东刘寄奴			温				苦						心							脾	肝			['破血','通经','止血','止痛','消积','除胀']	3～6g	活血化瘀药	活血调经药
广东王不留行					平			甘						大肠			胃				肝			['活血','通经','下乳','消肿']	9~15g	活血化瘀药	活血调经药
广藿香			微温						辛		肺						胃			脾				['芳香','化浊','开胃','止呕','发表','解暑']	3～9g	其他	化湿药
广金钱草				凉				甘											膀胱		肝	肾		['清热','除湿','利尿','通淋']	15～30g	利水渗湿药	利湿通淋药
广昆布	寒									咸												肾		['清热','解毒','软坚','消痰','利水','降血压']	9~15g	利水渗湿药	利水消肿药
广山药					平			甘			肺						胃			脾				['健脾','养胃','生津','益肺','补肾','涩精']	10～30g	补虚药	补气药
广升麻	微寒							微甘	辛		肺						胃							['清热','解毒','发表','透疹']	3~9g	解表药	辛凉解表药
广郁金	寒						苦		辛		肺		心					胆			肝			['活血','止痛','行气','解郁','清心','凉血','利胆','退黄']	3～10g	活血化瘀药	活血止痛药
广枣					平	酸		甘																['行气','活血','养心','安神']	1.5~2.5g	安神药	养心安神药
龟甲	微寒							甘		咸			心								肝	肾		['滋阴','潜阳','益肾','强骨','养血','补心']	9～24g	补虚药	补阴药
鬼箭羽	寒						苦													脾	肝			['行血','通经','散瘀','止痛']	6～10g	活血化瘀药	活血调经药
鬼针草	寒						苦				肺			大肠							肝			['清热','解毒','活血','祛风']	15~30g	清热药	清热解毒药
桂花			温						辛		肺									脾		肾		['温肺','化饮','散寒','止痛']	3～9g	化痰止咳平喘药	温化寒痰药
桂皮			温					甘	辛					大肠			胃				肝	肾		['温脾胃','暖肝肾','祛寒','止痛','散瘀','消肿']	6～12g	其他	温里药
桂枝			温					甘	辛		肺		心						膀胱					['发表','解肌','温经','通脉','助阳','化气','平冲','降气']	3～9g	其他	辛温解表药
蛤蚧					平					咸	肺											肾		['补肺','益肾','纳气','定喘','助阻','益精']	3~6g	补虚药	补阳药
蛤蟆油					平			甘		咸	肺											肾		['补肾','益精','养阴','润肺']	---	补虚药	补阳药
孩儿茶				凉			苦				肺		心											['清热','化痰','止血','消食','生肌','定痛']	1～3g	止咳平喘化痰药	清化热痰药
海参					平			甘		咸	肺											肾		['补肾','益精','养血','润燥','止血']	15～30g	补虚药	补血药
海带	寒									咸							胃				肝	肾		['消痰','软坚','散结','利水','消肿']	6-12g	止咳化痰平喘药	清化热痰药
海风藤			微温						辛												肝			['祛风','除湿','舒筋','活络']	10~20g	祛风湿药	祛风湿强筋骨药
海浮石	寒									咸	肺											肾		['清肺','化痰','软坚','散结']	9～15g	化痰止咳平喘药	清化热痰药
海狗肾		热								咸												肾		['暖肾','壮阳','益精','补髓']	1~3g	补虚药	补阳药
海蛤壳	微寒									咸	肺						胃				肝			['清肺','化痰','软坚','利水','制酸','敛疮']	10~15g	化痰止咳平喘药	清化热痰药
海金沙	寒							甘								小肠			膀胱					['清利','湿热','通淋','止痛']	6～15g	利水渗湿药	利尿通淋药
海龙			温					甘		咸											肝	肾		['温肾','壮阳','散结','消肿']	3～9g	补虚药	补阳药
海马			温					甘		咸											肝	肾		['温肾','壮阳','散结','消肿']	3～9g	补虚药	补阳药
海螵蛸			温							咸										脾		肾		['收敛','止血','涩精','止带','制酸','敛疮']	5～9g	收涩药	固精缩尿止带药
海桐皮					平		苦		辛											脾	肝			['祛风湿','通经络','止痛']	10～20g	祛风湿药	祛风湿强筋骨药
海芋				凉					辛				心	大肠				胆			肝			['清热','解毒','散结','消肿']	3~10g	清热药	清热解毒药
海藻	寒						苦			咸							胃				肝	肾		['软坚','散结','消痰','利水']	6～12g	化痰止咳平喘药	清化热痰药
寒水石	寒								辛	咸			心				胃					肾		['清热','泻火']	10~15g	清热药	清热泻火药
蔊菜			微温				苦		辛		肺										肝			['祛痰','止咳','解表','散寒','活血','解毒','利湿','退黄']	10～30g	解表药	辛温解表药
汉防己			微温					甘	辛										膀胱	脾	肝			['解表','祛风','胜湿','止痛','止痉']	5～10g	解表药	发散风寒药
汉桃叶			温				微苦										胃			脾	肝			['祛风','止痛','舒筋','活络']	9~15g	活血化瘀药	活血止痛药
诃子					平	酸	苦				肺			大肠										['涩肠','敛肺','降水','利咽']	3～9g	收涩药	敛肺涩肠药
合欢花					平			甘					心								肝			['解郁','安神']	5～10g	安神药	养心安神药
合欢皮					平			甘			肺		心								肝			['解郁','安神','活血','消肿']	6～12g	安神药	养心安神药
何首乌			温				苦	甘					心								肝	肾		['解毒','消痈','润肠','通便']	6～12g	泻下药	润下药
荷梗					平		苦												膀胱	脾				['解暑','清热','理气','化湿']	9-15g	化湿药	化湿药
荷叶					平		苦										胃			脾	肝			['清暑','化湿','升发','清阳','凉血','止血']	3～10g	清热药	清热凉血药
荷叶蒂					平		苦																	['清暑','去湿','和血','安胎']	4.5-9g	收涩药	固精缩尿止带药
核桃仁			温					甘			肺			大肠								肾		['温补','肺肾','定喘','化痰','润肠','涩精']	6～9g	补虚药	补阳药
鹤草芽				凉			苦																	['驱虫','解毒','消肿']	10～30g	活血化瘀药	活血止痛药
鹤虱					平		苦		辛								胃			脾				['杀虫','消积']	5～10g	其他	驱虫药
黑豆					平			甘												脾		肾		['益精','明目','养血','祛风','利水','解毒']	9～30g	利水渗湿	药利水消肿药
黑姜散		热							辛		肺		心				胃			脾		肾		['温中','散寒','回阳','通脉','温肺','化饮']	3～10g	其他	温里药
黑山栀	寒						苦				肺		心		三焦									['泻火','除烦','清热','利湿','凉血','解毒','消肿','止痛']	6～10g	清热药	清热泻火药
黑芝麻					平			甘						大肠							肝	肾		['补肝肾','益精血','润肠燥']	9～15g	补虚药	补血药
黑种草子			温					甘	辛															['补肾','健脑','通经','通乳','利尿']	2～6g	利水渗湿药	利尿通淋药
红参			温				微苦	甘			肺		心							脾		肾		['大补','元气','复脉','固脱','益气','摄血']	3～9g	补虚药	补气药
红大戟	寒						苦				肺									脾		肾		['泻水','逐饮','解毒','消肿','散结']	1.5~3g	泻下药	峻下逐水药
红豆蔻			温						辛		肺									脾				['燥湿','散寒','醒脾','消食']	3～6g	其他	温里药
红粉		热							辛		肺									脾			大毒	['拔毒','除脓','去腐','生肌']	---	其他	拔毒生肌药
红花			温						辛				心								肝			['活血','通经','散瘀','止痛']	3～9g	活血化瘀药	活血调经药
红景天					平		苦	甘			肺		心											['益气','活血','通脉','平喘']	9～12g	补益药	补气药
红芪			温					甘			肺									脾				['补气','固表','利尿','托毒','排脓','敛疮','生肌']	9～30g	收涩药	固表止汗药
红曲			温					甘						大肠						脾	肝			['活血','化瘀','健脾','消食']	6～15g	其他	消食药
红丝线	寒						苦		辛		肺													['清热','解毒','凉血','熄风','散瘀','消肿']	9～15g	清热药	清热凉血药
红糖			温					甘			肺						胃			脾	肝			['补中','缓肝','活血','化瘀']	6～15g	补虚药	补血药
红天葵				凉				甘																['清热','凉血','止咳','化痰','散瘀','消肿']	6～9g	清热药	清热凉血药
红药子	微寒						微苦							大肠			胃		膀胱	脾				['止血','活血','养血','止痢','收敛','止痛']	3～9g	止血药	收敛止血药
红鱼眼					平																		有毒	['祛风','活血','散瘀','消肿']	9~15g	活血化瘀药	活血止痛药
猴耳环	微寒						微苦										胃			脾	肝			['清热','解毒','去湿','敛疮']	6~9g	清热药	清热解毒药
厚朴			温				苦		辛		肺			大肠			胃			脾				['燥湿','消痰','下气','除满']	3～9g	其他	化湿药
厚朴花			温				苦										胃			脾				['芳香','化湿','理气','宽中']	3～6g	其他	化湿药
胡黄连	寒						苦							大肠			胃				肝			['退虚热','除疳热','清湿热']	3～10g	清热药	清虚热药
胡椒		热							辛					大肠			胃						有毒	['温中','散寒','下气','消痰']	0.1～0.5g	其他	温里药
胡芦巴			温				苦															肾		['温肾','祛寒','止痛']	4.5～9g	补虚药	补阳药
胡荽			温						辛		肺									脾	肝			['发表','透疹','消食','开胃','止痛','解毒']	9～15g	解表药	辛温解表药
胡桃肉			温					甘			肺			大肠								肾		['敛肺','定喘','补肾','强腰','润肠','通便']	6～9g	补虚药	补阳药
胡颓子叶					平	酸					肺													['敛肺','平喘','止咳']	9～15g	化痰止咳平喘药	止咳平喘药
葫芦					平			甘			肺									脾		肾		['止渴','除烦','利水','消肿','通淋','散结']	9～30g	利水渗湿药	利水消肿药
葫芦茶				凉			苦				肺								膀胱		肝			['清热','解毒','利水','除湿','消食','杀虫']	25~75g	清热药	清热解毒药
湖北贝母				凉			微苦				肺		心											['清热','化痰','止咳','散结']	3~9g	化痰止咳平喘药	清化热痰药
槲寄生					平		苦														肝	肾		['祛风湿','补肝肾','强筋骨','降血压','安胎','下乳']	9～15g	祛风湿药	祛风湿强筋骨药
虎耳草	寒						微苦				肺						胃							['祛风','清热','清血','解毒']	10～15g	清热药	清热凉血药
虎杖	微寒						微苦				肺							胆			肝			['祛风','利湿','散瘀','止痛','止咳','化痰']	9～30g	利水渗湿药	利湿退黄药
琥珀					平			甘					心			小肠					肝			['镇惊','安神','散瘀','止血','利水','通淋','去翳','明目']	1～3g	安神药	重镇安神药
花粉	微寒						微苦	甘			肺						胃							['清热','泻火','生津','止渴','消肿','排脓']	10～15g	清热药	清热泻火药
花椒			温						辛								胃			脾		肾		['温中','止痛','杀虫','止痒']	3～6g	其他	温里药
花蕊石					平	酸															肝			['化瘀','止血']	4.5～9g	止血药	化瘀止血药
华山参		热					微苦	甘			肺		心											['平喘','止咳','安神','镇惊']	0.1～0.2g	化痰止咳平喘药	温化寒痰药
滑石	寒							甘			肺						胃		膀胱					['利尿','通淋','清热','解暑']	10～30g	利水渗湿药	利尿通淋药
化橘红			温				苦		辛		肺									脾				['散寒','燥湿','利气','消痰']	3～6g	其他	理气药
怀地黄	寒							甘					心								肝	肾		['清热','凉血','养阴','生津']	10～15g	清热药	清热凉血药
怀山药					平			甘			肺									脾		肾		['补脾','养胃','生津','益肺','补肾','涩精']	10～30g	补虚药	补气药
槐花	微寒						苦							大肠							肝			['凉血','止血','清肝','泻火']	5～9g	止血药	凉血止血药
槐角	寒						苦							大肠							肝			['清热','泻火','凉血','止血']	6～9g	止血药	凉血止血药
槐枝					平		苦						心								肝			['散瘀','止血','清热','燥湿','祛风','杀虫']	15～30g	清热药	清热燥湿药
槐子	微寒						苦							大肠							肝			['凉血','止血','清肝','泻火']	5～10g	止血药	凉血止血药
黄柏	寒						苦												膀胱			肾		['清热','燥湿','泻火','除蒸','解毒','疗疮']	3～12g	清热药	清热燥湿药
黄花倒水莲					平		微苦	甘												脾	肝	肾		['益气','养血','健脾','利湿','活血','调经']	15~30g	活血化瘀药	活血调经药
黄荆子			温				苦		辛		肺						胃				肝			['祛风','解表','化痰','止咳','行气','止痛']	3～10g	解表药	辛温解表药
黄精					平			甘			肺									脾		肾		['补气','养阴','健脾','润肺','益肾']	9～15g	补虚药	补阴药
黄连	寒						苦						心	大肠			胃	胆		脾	肝			['清热','燥湿','泻火','解毒']	2～5g	清热药	清热燥湿药
黄莲	寒						苦						心				胃	胆		脾	肝			['清热','燥湿','泻火','解毒']	2～5g	清热药	清热泻火药
黄皮核			微温				苦		辛		肺						胃				肝			['理气','消食','散结','消胀','化痰','止咳']	6~9g	其他	理气药
黄芪			微温					甘			肺									脾				['补气','固表','利尿','托毒','排脓','生肌']	9～30g	补虚药	补气药
黄芩	寒						苦				肺			大肠		小肠		胆		脾				['清热','燥湿','泻火','解毒','止血','安胎']	3～9g	清热药	清热燥湿药
黄蜀葵				凉				甘									胃		膀胱			肾		['利水','散瘀','消肿','解毒','通乳']	15～30g	利水渗湿药	利水消肿药
黄藤	寒						苦						心								肝			['清热','解毒','泻火','通便']	30～60g	清热药	清热解毒药
黄药子					平		苦						心								肝			['清热','凉血','解毒','消瘿']	3～6g	清热药	清热解毒药
回回蒜			微温						辛												肝			['消炎','退肿','平喘','截疟']	5~15g	化痰止咳平喘药	止咳平喘药
火麻仁					平			甘						大肠			胃			脾				['润燥','通便','补虚']	9～15g	泻下药	攻下药
火炭母	微寒					微酸														脾	肝			['清热','利湿','凉血','解毒','明目','退翳']	25~50g	清热药	清热燥湿药
火硝			温				苦			咸	肺		心							脾			小毒	['攻坚','破积','利水','泻下','解毒','消肿']	1.5～3.0g	泻下药	攻下药
藿香			微温						辛		肺						胃			脾				['快气','和中','辟秽','祛湿']	5～9g	其他	理气药
藿香叶			温						辛		肺						胃			脾				['芳香','化湿','和中','止呕','发表','解暑']	3-10g	化湿药	化湿药
鸡蛋花					平		微苦	甘			肺			大肠										['清利','湿热','清肠','止泻','止咳','化痰']	9～15g	清热药	清热泻火药
鸡骨草				凉			微苦	甘									胃				肝			['利湿','退黄','清热','解毒','疏肝','止痛']	15～30g	利水渗湿药	利湿退黄药
鸡骨香			温				苦		辛															['理气','止痛','祛风','除湿','舒筋','活络']	9～15g	止血药	化淤止血药
鸡冠花				凉				甘						大肠							肝			['收敛','止血','止带','止痢']	6～12g	止血药	收敛止血药
鸡内金					平			甘								小肠	胃		膀胱	脾				['健胃','消食','涩精','止遗']	3～9g	其他	消食药
鸡矢藤					平		苦	甘			肺						胃			脾	肝			['祛风','活血','止痛','解毒','消食','导滞','除湿','消肿']	10～15g	祛风湿药	祛风湿强筋骨药
鸡血藤			温				苦	甘													肝	肾		['补血','活血','通络']	9～15g	活血化瘀药	活血调经药
鸡眼草				凉			苦							大肠			胃							['清热','解毒','健脾','利湿']	15～30g	清热药	清热解毒药
鸡爪大黄	寒						苦					心包	心	大肠			胃			脾	肝			['泻热','通肠','凉血','解毒','逐瘀','通经']	3~30g	泻下药	攻下药
积雪草	寒						苦		辛											脾	肝	肾		['清湿热','解毒','消肿','活血','利尿']	15～30g	清热药	清热燥湿药
吉祥草				凉				甘			肺									脾	肝			['清肺','止咳','理血','补肾','解毒','接骨']	15~30g	清热药	清热解毒药
急性子			温				微苦		辛		肺										肝			['破血','软坚','消积']	3～4.5g	活血化瘀药	破血消癥药
蒺藜			微温				苦		辛												肝		有毒	['平肝','解郁','活血','祛风','明目','止痒']	6～9g	平肝息风药	平肝息风药
寄生黄	寒						苦				肺						胃				肝			['行气','健胃','清热','利湿','凉血','止血','补肾','涩精']	9～15g	其他	理气药
檵木					平		苦							大肠			胃				肝			['收敛','止血','清热','解毒','止泻']	6~10g	止血药	收敛止血药
檵木叶				凉			苦							大肠			胃				肝			['清热','解毒','收敛','止血']	15～30g	止血药	收敛止血药
假芫茜			温				微苦		辛		肺			大肠			胃			脾				['疏风','解表','芳香','健胃']	9~15g	解表药	辛温解表药
剑花	微寒							甘			肺													['清热','润肺','化痰','止咳']	9~15g	化痰止咳平喘药	清化热痰药
姜黄			温				苦		辛											脾	肝			['破血','行气','通经','止痛']	3～9g	活血化瘀药	活血止痛药
僵蚕					平				辛	咸	肺						胃				肝			['祛风','定惊','化痰','散结']	5～9g	平肝息风药	息风止痉药
降香			温						辛				心							脾	肝			['行气','活血','止痛','止血']	9~15g	其他	理气药
椒目			温				苦		辛		肺								膀胱	脾				['利水','消肿','祛痰','平喘']	2～5g	利水渗湿药	利水消肿药
焦山楂			微温			酸		甘									胃			脾	肝			['消食','健胃','行气','散瘀','降脂','化浊']	9～12g	其他	消食药
绞股蓝	寒						苦				肺									脾		肾		['清热','解毒','止咳','祛痰']	2.5～3.5g	补虚药	补气药
芥子			温						辛		肺													['温肺','豁痰','利气','散结','通络','止痛']	3～9g	化痰止咳平喘药	温化寒痰药
金沸草			温				苦		辛	咸	肺			大肠										['降气','化痰','行水']	4.5~9g	化痰止咳平喘药	温化寒痰药
金刚刺					平		苦		辛		肺			大肠								肾		['祛风','除湿','活血','解毒','镇惊','息风']	3～9g	祛风湿药	祛风湿寒药
金果榄	寒						苦				肺			大肠										['清热','解毒','利咽','目痛']	3～9g	清热药	清热解毒药
金莲花	微寒						苦				肺						胃							['清热','解毒','消肿','明目']	3～6g	清热药	清热解毒药
金礞石					平			甘		咸	肺		心								肝			['坠痰','下气','平肝','镇惊']	3~6g	安神药	重镇安神药
金钱白花蛇			温					甘		咸											肝			['祛风','通络','止痉']	3～4.5g	祛风湿药	祛风湿强筋骨药
金钱草	微寒							甘		咸								胆	膀胱		肝	肾		['清利','湿热','通淋','消肿','利湿','退黄']	15～60g	利水渗湿药	利尿通淋药
金荞麦				凉					微辛		肺													['清热','解毒','排脓','祛瘀']	15～45g	清热药	清热解毒药
金丝草				凉				甘																['清热','解暑','利尿']	30～60g	利水渗湿药	利水消肿药
金铁锁			温				苦		辛												肝			['祛风','除湿','散瘀','止痛','解毒','消肿']	0.1～0.3g	祛风湿药	祛风湿强筋骨药
金银花	寒							甘			肺		心				胃							['清热','解毒','凉散','风热']	6～15g	清热药	清热解毒药
金樱根					平	酸								大肠					膀胱			肾		['固精','止带','固崩','止带','涩肠','止泻']	6-12g	收涩药	敛肺涩肠药
金樱子					平	酸		甘						大肠					膀胱			肾		['固精','缩尿','涩肠','止泻']	6～12g	收涩药	固精缩尿止带药
筋骨草	寒						苦				肺													['清热','解毒','凉血','消肿']	15～30g	清热药	清热解毒药
锦灯笼	寒						苦				肺													['清热','解毒','利咽','化痰','利尿']	15～20g	清热药	清热解毒药
京大戟	寒						苦				肺									脾		肾	有毒	['泻水','逐饮','消肿','散结']	1.5~3g	泻下药	峻下逐水药
荆芥			微温						辛		肺										肝			['发表','散风','透疹']	4.5～9g	解表药	辛温解表药
荆芥穗			微温						辛		肺										肝			['解表','散风','消疮','透疹']	5～10g	解表药	发散风寒药
荆芥炭			温、微温				苦				肺										肝			['收敛','止血']	5～10g	解表药	发散风寒药
粳米					平			甘									胃			脾				['健脾','和胃','补中','益气','除烦渴','止泻痢']	9〜30g	其他	理气药
景天三七					平	微酸		甘					心								肝			['散瘀','止血','安神','镇痛']	9～15g	止血药	化瘀止血药
九层塔			温						辛		肺			大肠			胃			脾				['疏风','解表','祛风','消肿','散瘀','止痛','活血','通经']	5~10g	解表药	辛温解表药
九里香			温				微苦		辛								胃				肝			['行气','止痛','活血','散瘀']	6～12g	其他	理气药
九龙藤			温				微苦	甘						大肠							肝			['祛风','除湿','行气','活血']	9～15g	活血化瘀药	活血止痛药
九香虫			温						辛	咸										脾	肝	肾		['行气','止痛','温肾','壮阳']	3～9g	其他	理气药
韭菜子			温					甘	辛												肝	肾		['温补','肝肾','壮阳','固精']	3～9g	补虚药	补阳药
救必应	寒						苦				肺			大肠			胃				肝			['泻火','解毒','清热','利湿','行气','止痛','凉血','止血']	9～15g	清热药	清热燥湿药
桔梗					平		苦		辛		肺													['宣肺','祛痰','利咽','排脓']	3～9g	化痰止咳平喘药	清化热痰药
菊花	微寒						苦	甘			肺										肝			['散风','清热','平肝','明目']	5～9g	解表药	辛凉解表药
菊苣				凉			微苦			咸														['清肝','利胆','健胃','消食','利尿','消肿']	9—18g	利水渗湿药	利水消肿药
橘核					平		苦														肝	肾		['理气','散结','止痛']	3～9g	收涩药	敛肺涩肠药
橘皮			温				苦		辛		肺									脾				['理气','健脾','燥湿','化痰']	3～10g	其他	理气药
卷柏					平				辛				心								肝			['活血','祛瘀','止血']	5~10g	活血化瘀药	活血调经药
决明子	微寒						苦	甘						大肠							肝	肾		['清热','明目','润肠','通便']	10～15g	清热药	清虚热药
榼藤子					平			微甘						大肠			胃				肝		有毒	['行气','止痛','利湿','消肿']	3~9g	收涩药	敛肺涩肠药
苦参	寒						苦						心	大肠			胃		膀胱		肝			['清热','燥湿','杀虫','利尿']	4.5～9g	清热药	清热燥湿药
苦地胆	寒						苦		微辛		肺										肝	肾		['清热','解毒','利水','消肿']	9～15g	清热药	清热解毒药
苦地丁	寒						苦						心	大肠							肝			['清热','解毒','散结','消肿']	9~15g	清热药	清热解毒药
苦丁茶	寒						苦	甘			肺						胃				肝			['疏风','清热','除烦','止咳','消食','化痰']	6～9g	清热药	清热凉血药
苦豆子	寒						苦							大肠			胃						有毒	['清热','燥湿','止痛','杀虫']	1.5~3g	清热药	清热燥湿药
苦瓜	寒						苦				肺		心							脾				['祛暑','涤热','明目','解毒']	6～15g	清热药	清热泻火药
苦楝皮	寒							甘									胃			脾	肝			['驱虫','疗癣']	4.5～9g	其他	驱虫药
苦木	寒						苦				肺			大肠										['清热','解毒','祛湿']	6～15g	清热药	清热解毒药
苦石莲	寒						苦						心							脾		肾		['散瘀','止痛','清热','去湿']	6～9g	活血化瘀药	活血止痛药
苦杏仁			微温				苦				肺			大肠										['降气','止咳','平喘','润肠','通便']	4.5～9g	化痰止咳平喘药	止咳平喘药
苦玄参	寒						苦				肺						胃				肝			['清热','解毒','消肿','止痛']	9～15g	清热药	清热解毒药
宽筋藤				凉			微苦														肝			['舒筋','活络','祛风','止痛']	9~15g	祛风湿药	祛风湿强筋骨药
款冬花			温				微苦		辛		肺													['润肺','下气','止咳','化痰']	5～9g	化痰止咳平喘药	止咳平喘药
昆布	寒									咸							胃				肝	肾		['软坚','散结','消痰','利水']	6～12g	化痰止咳平喘药	止咳平喘药
昆明山海棠			温				苦		辛											脾	肝	肾	大毒	['祛风湿','祛瘀','通络','续筋','接骨']	6~15g	祛风湿药	祛风寒湿药
栝楼	寒						微苦	甘			肺			大肠			胃							['清热','涤痰','散结','宽胸','润燥','滑肠']	9～15g	化痰止咳平喘药	清热化痰药
栝楼皮	寒							甘			肺						胃							['清热','化痰','利气','宽胸']	6～10g	化痰止咳平喘药	清热化痰药
辣椒		热							辛				心							脾				['温中','散寒','开胃','消食']	0.9～2.4g	其他	温里药
辣蓼			温						辛					大肠			胃			脾				['除湿','化滞']	15~30g	其他	化湿药
莱菔子					平			甘	辛		肺						胃			脾				['下气','祛痰','消食','化积']	4.5～9g	其他	消食药
蓝布正				凉			微苦	甘			肺									脾	肝			['益气','健脾','补血','养阴','润肺','化痰']	9～30g	补虚药	补阴药
狼毒					平				辛											脾	肝			['散结','杀虫']	1～2.4g	其他	杀虫止痒药
狼牙					平		苦						心								肝			['收敛','止血','截疟','止痢','解毒','补虚']	6～12g	止血药	收敛止血药
榔榆皮	寒						苦														肝	肾		['清热','解毒','利水','消肿']	30～60g	清热药	清热解毒药
老鹳草					平		苦		辛											脾	肝	肾		['祛风湿','通经络','止泻痢']	9～15g	祛风湿药	祛风湿强筋骨药
了哥王	寒						苦		辛		肺						胃						有毒	['清热','解毒','散结','逐瘀','利水','杀虫']	10～15g	清热药	清热解毒药
雷公根					平		苦		辛		肺		心	大肠						脾		肾		['明目','生津','祛风','止痢','利湿','消肿','清热','解毒','活血','止血']	35～70g	清热药	清热解毒药
雷公藤				凉			苦		辛				心								肝		大毒	['祛风','除湿','活血','通络','消肿','止痛','杀虫','消炎','解毒']	15～25g	祛风湿药	祛风湿强筋骨药
雷丸	寒						微苦							大肠			胃							['杀虫','消积']	15～21g	其他	驱虫药
梨皮				凉				甘			肺		心	大肠								肾		['清心','润肺','降火','生津']	6～15g	清热药	清热泻火药
藜					平			甘																['清热','利湿','杀虫']	5～15g	清热药	清热燥湿药
藜芦	寒						苦		辛		肺						胃				肝			['涌吐','风痰','杀虫','疗疮']	0.3～0.9g	其他	涌吐药
荔枝核			温				微苦	甘													肝	肾		['行气','散结','祛寒','止痛']	4.5～9g	其他	理气药
连钱草	微寒						微苦		辛										膀胱		肝	肾		['利湿','通淋','清热','解毒','散瘀','消肿']	15～30g	利水渗湿药	利尿通淋药
连翘	微寒						苦				肺		心			小肠								['清热','解毒','消肿','散结']	6～15g	清热药	清热解毒药
连翘心	寒						苦						心											['清心','开窍']	3～6克	清热药	清热解毒药
莲房			温				苦														肝			['化瘀','止血']	5～10g	止血药	化瘀止血药
莲须					平			甘					心									肾		['固肾','涩精']	1.5～5g	收涩药	固精缩尿止带药
莲子					平			甘					心							脾		肾		['补脾','止泻','益肾','固精','养心','安神']	6～15g	收涩药	固精缩尿止带药
莲子心	寒						苦						心									肾		['清心','安神','交通','心肾','涩精','止血']	2～5g	安神药	养心安神药
凉粉草	寒							甘																['消暑','解渴','清热','解毒']	30~60g	清热药	清热凉血药
两面针					平		苦		辛								胃				肝		有毒	['行气','止痛','活血','化瘀','祛风','通络']	5～10g	活血化瘀药	活血止痛药
两头尖		热							辛											脾				['祛风湿','消痈肿']	1.5～3g	祛风湿药	祛风湿强筋骨药
蓼大青叶	寒						苦						心				胃							['清热','解毒','凉血','消斑']	9～15g	清热药	清热解毒药
灵香草					平			甘	辛		肺													['清热','行气','止痛','驱蛔']	3～9g	其他	驱虫药
灵芝					平			甘			肺		心								肝	肾		['补气','安神','止咳','平喘']	6～12g	补虚药	补气药
凌霄花	寒					酸		甘				心包									肝			['行气','祛瘀','凉血','祛风']	4.5～9g	活血化瘀药	活血调经药
羚羊角	寒									咸			心								肝			['平肝','息风','清肝','明目','散血','解毒']	1～3g	平肝息风药	息风止痉药
刘寄奴			温				微苦		辛				心							脾	肝			['活血','通经','消积','止痛']	3～10g	活血化瘀药	活血调经药
硫黄			温			酸								大肠								肾		['解毒','杀虫','疗疮','助阳','通便']	1.5～3g	补虚药	补阳药
柳枝	寒						苦										胃				肝			['祛风','利湿','解毒','消肿']	15～30g	利水渗湿药	利水消肿药
六棱菊			微温				苦		辛		肺								膀胱	脾				['祛风','除湿','活血','解毒']	10～15g	祛风湿药	祛风湿散寒药
六神曲			温					甘	辛								胃			脾				['消食','化积','健脾','和胃']	10～15g	其他	消食药
六月寒					平		微苦		辛		肺													['疏风','解表','宣肺','止咳']	10～15g	解表药	辛温解表药
龙齿				凉				甘					心								肝			['镇静','安神','清热','除烦']	10~15g	安神药	重镇安神药
龙胆	寒						苦											胆			肝			['清肝火','除湿热','健胃']	2.5～4.5g	清热药	清热泻火药
龙胆草	寒						苦											胆			肝			['清热','燥湿','泻火']	3～6g	清热药	清热泻火药
龙骨					平			甘					心	大肠							肝	肾		['镇心','安神','平肝','潜阳','固涩','收敛']	10～15g	平肝息风药	平抑肝阳药
龙葵	寒						苦												膀胱				有毒	['清热','解毒','利水','消肿','凉血','止血']	9～30g	清热药	清热解毒药
龙脷叶					平			甘			肺						胃							['润肺','止咳','通便']	10～15g	化痰止咳平喘药	止咳平喘药
龙涎香			温			酸		甘			肺		心								肝	肾		['行气','活血','止咳','化痰','消积','利水']	0.3~1g	其他	理气药
龙眼肉			温					甘					心							脾				['补益','心脾','养血','安神']	10～15g	补虚药	补气药
蝼蛄	寒									咸				大肠		小肠			膀胱					['利水','消肿','通淋']	6~9g	利水渗湿药	利水消肿药
漏芦	寒						苦										胃							['清热','解毒','排脓','通乳']	4.5～9g	清热药	清热解毒药
芦根	寒							甘			肺						胃							['清热','生津','除烦','止呕','利尿']	15～30g	清热药	清热泻火药
芦荟	寒						苦							大肠			胃				肝			['清肝热','通便','杀虫','疗疳']	2～5g	泻下药	攻下药
炉甘石					平			甘												脾	肝			['解毒','明目','退翳','收湿','止痒','敛疮']	---	其他	拔毒生肌药
陆英					平		微苦	甘													肝			['祛风','利湿','舒筋','活血']	9～15g	活血化瘀药	活血止痛药
鹿角胶			温					甘		咸											肝	肾		['补肾','益肝','养血','益精']	3～6g	补虚药	补阳药
鹿茸			温					甘		咸											肝	肾		['壮肾阳','益精血','强筋骨','调冲任','托疮毒']	1~2g	补虚药	补阳药
鹿衔草			温				苦	甘													肝	肾		['祛风湿','强筋骨','止血','止咳']	9～15g	祛风湿药	祛风湿强筋骨药
鹿药			温				苦	甘													肝	肾		['补肾','壮阳','活血','祛瘀','祛风','止痛']	6～15g	补虚药	补阳药
路路通					平		苦														肝	肾		['祛风','活络','利水','通经']	5～9g	祛风湿药	祛风湿强筋骨药
罗布麻叶				凉			苦	甘													肝			['平肝','安神','清热','利水']	6～12g	平肝息风药	平抑肝阳药
罗汉果				凉				甘			肺			大肠										['清热','润肺','滑肠','通便']	9～15g	清热药	清热解毒药
罗勒			温						辛														有毒	['疏风','行气','化湿','消食','活血','解毒']	10~15g	其他	理气药
萝卜					平			甘	辛		肺						胃			脾				['消食','除胀','降气','化痰']	5～12g	其他	消食药
萝芙木	寒						苦																有毒	['清风热','降肝火','消肿毒']	15～30g	清热药	清热泻火药
络石藤	微寒						苦						心								肝	肾		['祛风','通络','凉血','消肿']	6～12g	祛风湿药	祛风湿强筋骨药
落地生根	寒					微酸					肺											肾		['解毒','消肿','活血','止痛','拔毒','生肌']	15~30g	止血药	凉血止血药
绿豆	寒							甘					心				胃				肝			['清热','消暑','利水','解毒']	15～30g	清热药	清热解毒药
绿萼梅					平	微酸					肺						胃				肝			['疏肝','解郁','和中','化痰']	3~5g	其他	理气药
葎草	寒						苦	甘			肺											肾		['清热','解毒','利尿','通淋']	10～15g	利水渗湿药	利尿通淋药
麻黄			温				微苦		辛		肺								膀胱					['发汗','散寒','宣肺','平喘','利水','消肿']	2～9g	解表药	辛温解表药
麻黄根					平			甘			肺		心											['固表','止汗']	3～9g	收涩药	固表止汗药
麻仁					平			甘						大肠			胃			脾				['润燥','通便','补虚']	9～15g	泻下药	攻下药
麻油				凉				甘						大肠										['润肠','通便','解毒','生肌']	17~68hs	泻下药	润下药
马宝				凉				甘		咸			心								肝		有毒	['镇惊','化痰','清热','解毒']	0.3～3g	安神药	重镇安神药
马鞭草				凉			苦													脾	肝			['活血','散瘀','截疟','解毒','利水','消肿']	4.5～9g	活血化瘀药	活血调经药
马勃					平				辛		肺													['清肺','利咽','止血']	1.5～6g	清热药	清热解毒药
马齿苋	寒					酸								大肠							肝			['清热','解毒','凉血','止血']	9～15g	清热药	清热解毒药
马兜铃	微寒						苦				肺			大肠										['清肺','降气','止咳','平喘','清肠','消痔']	3～9g	化痰止咳平喘药	止咳平喘药
马兰				凉					辛		肺			大肠			胃				肝			['凉血','止血','清热','利湿','解毒','消肿']	10～30g	止血药	凉血止血药
马蔺子					平			甘			肺						胃			脾	肝			['清热','利湿','消肿','解毒','止血']	5～10g	止血药	凉血止血药
马钱子			温				苦													脾	肝		有毒	['清肺','利咽','止血']	0.2～0.6g	活血化瘀药	活血疗伤药
马桑根				凉		酸	苦																	['祛风','除湿','解毒','散结','杀虫']	3～9g	祛风湿药	祛风湿强筋骨药
马蹄金				凉			苦		辛															['清热','利湿','解毒','消肿']	10～30g	清热药	清热燥湿药
马尾连	寒						苦				肺		心	大肠				胆			肝			['清热','燥湿','泻火','解毒']	6~12g	清热药	清热燥湿药
麦冬	微寒						微苦	甘			肺		心				胃							['养阴','生津','润肺','清心']	6～12g	补虚药	补阴药
麦门冬	微寒						微苦	甘					心				胃			脾				['养阴','生津','润肺','清心']	6～12g	补虚药	补阴药
麦芽					平			甘									胃			脾				['行气','消食','健脾','开胃','退乳','消胀']	10～12g	其他	消食药
满山红			温				苦		辛		肺													['止咳','祛痰']	9～15g	化痰止咳平喘药	止咳平喘药
蔓荆子	微寒						苦		辛								胃		膀胱		肝			['疏散','风热','清利','头目']	5～9g	解表药	辛凉解表药
芒硝	寒						苦			咸				大肠			胃							['泻热','通便','润燥','软坚','清火','消肿']	6～12g	泻下药	攻下药
猫爪草			温					甘	辛		肺										肝			['散结','解毒','消肿']	10～30g	化痰止咳平喘药	温化寒痰药
毛草龙				凉			微苦																	['清热','利湿','消肿','解毒']	30~60g	清热药	清热燥湿药
毛诃子					平			甘																['清热','解毒','收敛','养血','调和','诸药']	3～9g	清热药	清热解毒药
没药					平		苦		辛				心							脾	肝			['散瘀','定痛','消肿','生肌']	3～10g	活血化瘀药	活血止痛药
玫瑰花			温				微苦	甘												脾	肝			['行气','解郁','和血','止痛']	3～6g	其他	理气药
梅花					平	微酸					肺						胃				肝			['开郁','和中','化痰','解毒']	2.5～4.5g	其他	理气药
虻虫				凉			苦														肝			['逐瘀','消癥','破血','通经']	1.5～3g	活血化瘀药	破血消癥药
礞石					平					咸	肺										肝			['坠痰','下气','平肝','镇惊']	6~10g	化痰药	清热化痰药
猕猴桃	寒					酸		甘									胃				肝	肾		['解热','止渴','健胃','通淋']	30～60g	利水渗湿药	利水消肿药
密蒙花	微寒							甘													肝			['清热','养肝','泻火','明目','退翳']	3～9g	清热药	清热泻火药
密陀僧					平				辛	咸										脾	肝		有毒	['杀虫','收敛','祛痰','镇惊']	0.2～0.5g	其他	拔毒化腐生肌药
绵萆薢					平		苦										胃					肾		['利湿浊','祛风','通痹']	9～15g	利水渗湿药	利尿通淋药
绵马贯众	微寒						苦										胃				肝			['驱虫','止血','清热','解毒']	4.5～9g	其他	驱虫药
明党参	微寒						微苦	甘			肺									脾	肝			['润肺','化痰','养阴','和胃','平肝','解毒']	3～9g	平肝息风药	平抑肝阳药
明矾	寒					酸					肺						胃			脾				['祛痰','燥湿','止血','止泻','杀虫','止痒']	0.6～1.5g	攻毒杀虫止痒药	攻毒杀虫止痒药
茉莉花			温					微甘	辛								胃			脾	肝			['理气','止痛','辟秽','开郁']	3～10g	其他	理气药
墨旱莲	寒					酸		甘													肝	肾		['滋补','肝肾','凉血','止血']	6～12g	止血药	凉血止血药
母丁香			温						辛		肺						胃			脾		肾		['温中','降逆','散寒','止痛']	1～3g	其他	温里药
牡丹皮	微寒						苦		辛				心								肝	肾		['清热','凉血','活血','化瘀']	6~12g	清热药	清热凉血药
牡蒿				凉			苦	微甘																['清热','凉血','解毒']	10～15g	清热药	清热凉血药
牡荆叶					平		微苦		辛		肺													['解表','祛痰','止咳','平喘']	3～5g	化痰止咳平喘药	止咳平喘药
牡蛎	微寒									咸								胆			肝	肾		['重镇','安神','潜阳','补阴','软坚','散结']	9～30g	平肝息风药	平抑肝阳药
木鳖子				凉			苦	微甘									胃			脾	肝			['散结','消肿','攻毒','疗疮']	0.9～1.2g	清热药	清热解毒药
木耳					平			甘			肺			大肠						脾	肝			['补气','养血','润肺','止咳','止血','降压','抗癌']	3～10g	止血药	凉血止血药
木防己	寒						苦		辛										膀胱	脾		肾		['祛风','除湿','通经','活络','解毒','消肿']	5～10g	祛风湿药	祛风湿强筋骨药
木芙蓉叶				凉			苦		微辛		肺										肝			['清热','解毒','凉血','止血','消肿','止痛']	10～30g	清热药	清热凉血药
木瓜			温			酸														脾	肝			['平肝','舒筋','和胃','化湿']	6～9g	祛风湿药	祛风湿强筋骨药
木蝴蝶				凉			苦	甘			肺						胃				肝			['清肺','利咽','疏肝','和胃']	1.5～3g	化痰止咳平喘药	清化热痰药
木槿花				凉			苦	甘			肺									脾	肝			['清热','利湿','凉血','解毒']	3～9g	清热药	清热凉血药
木槿皮	微寒						苦	甘						大肠						脾	肝			['清热','利湿','杀虫','止痒']	3～9g	其他	杀虫止痒药
木棉花				凉				甘						大肠										['清热','利湿','解毒','止血']	6～9g	清热药	清热解毒药
木通	寒						苦						心			小肠			膀胱					['清心火','利小便','通经','下乳']	3～6g	利水渗湿药	利尿通淋药
木香			温				苦		辛					大肠	三焦		胃	胆		脾				['行气','止痛','健脾','消食']	3～10g	其他	理气药
木贼					平		苦	甘			肺										肝			['疏风','散热','退翳','止血']	3～9g	解表药	辛凉解表药
南板蓝根	寒						苦						心				胃							['清热','解毒','凉血','消肿']	9～15g	清热药	清热解毒药
南瓜子					平			甘						大肠										['杀虫','下乳','利水','消肿']	30～60g	利水渗湿药	利水消肿药
南鹤虱					平		微苦		辛								胃			脾				['驱虫']	6～15g	其他	驱虫药
南沙参	微寒							甘			肺						胃							['养阴','清肺','益胃','生津','化痰','益气']	9～15g	补虚药	补阴药
南山楂			微温			酸		甘									胃			脾	肝			['消积','化滞','破气','散瘀']	6～12g	其他	理气药
南天竹叶	寒						苦																	['清热','利湿','泻火','解毒']	9～15g	清热药	清热泻火药
南五味子			温			酸		甘			肺		心									肾		['收敛','固涩','益气','生津','补肾','宁心']	3～6g	收涩药	敛肺涩肠药
南星			温				苦		辛		肺									脾	肝		有毒	['化痰','燥湿','祛风','止痉','散结','消肿']	3～9g	化痰止咳平喘药	温化寒痰药
硇砂			温				苦		辛	咸							胃			脾	肝			['消积','软坚','化腐','生肌']	0.3～1g	其他	拔毒生肌药
闹羊花			温						辛												肝			['祛风','除湿','散瘀','定痛']	0.6～1.5g	祛风湿药	祛风湿强筋骨药
牛蒡子	寒						苦		辛		肺						胃							['疏散','风热','宣肺','透疹','消肿','解毒']	4.5～9g	解表药	辛凉解表药
牛大力					平			甘			肺									脾		肾		['补脾','润肺','舒筋','活络']	15~30g	祛风湿药	祛风湿强筋骨药
牛耳枫				凉				甘	辛												肝	肾	有毒	['清热','解毒','祛风','活血','止痛','消肿']	9~15g	清热药	清热解毒药
牛黄				凉				甘					心								肝			['清心','豁痰','开窍','凉肝','息风','解毒']	0.15～0.35g	平肝息风药	息风止痉药
牛膝					平	酸	苦														肝	肾		['补肝肾','强筋骨','逐瘀','通经','引血','下行']	4.5～9g	活血化瘀药	活血调经药
牛至				凉			微苦		辛		肺						胃				肝			['解表','理气','清暑','利湿']	3～9g	解表药	辛凉解表药
扭肚藤				凉			微苦							大肠			胃							['清热','解毒','利湿','消滞']	15~30g	清热药	清热燥湿药
糯稻根					平			甘			肺											肾		['养阴','除热','止汗']	15～30g	收涩药	固表止汗药
糯稻根须					平			甘					心								肝			['固表','止汗','益胃','生津','退虚热']	15~30g	收涩药	固表止汗药
糯米根须					平			甘			肺						胃					肾		['固表','止汗','益胃','生津','退虚热']	30-60g	固涩药	固表止汗药
女贞子				凉			苦	甘													肝	肾		['滋补','肝肾','明目','乌发']	6～12g	补虚药	补阴药
藕节					平			甘			肺						胃				肝			['收敛','止血','化瘀']	9～15g	止血药	收敛止血药
爬山虎			温						辛															['祛风','止痛','活血','通络']	15～30g	祛风湿药	祛风湿强筋骨药
盘龙参					平		苦	甘			肺		心											['益气','养阴','清热','解毒']	9～15g	补虚药	补气药
盘龙七					平		微苦				肺								膀胱	脾	肝			['补脾','健胃','收涩','固肠','除湿','利水','活血']	6～9g	收涩药	敛肺涩肠药
胖大海	寒							甘			肺			大肠										['清热','润肺','利咽','解毒','润肠','通便']	2～3枚	化痰止咳平喘药	清化热痰药
炮姜			温				苦													脾	肝			['温经','止血','温中','止痛']	3~6g	止血药	温经止血药
佩兰					平				辛		肺						胃			脾				['芳香','化湿','醒脾','开胃','发表','解暑']	3～9g	其他	化湿药
硼砂				凉				甘		咸	肺						胃							['清热','消痰','解毒','防腐']	5～3g	其他	拔毒生肌药
砒石		大热							辛		肺										肝		大毒	['攻毒','杀虫','蚀疮','去腐','截痰','平喘','截疟']	0.002~0.004g	其他	拔毒化腐生肌药
枇杷叶	微寒						苦				肺						胃							['清肺','止咳','降逆','止呕']	6～9g	化痰止咳平喘药	止咳平喘药
啤酒花				微凉			苦										胃				肝		有毒	['健胃','消食','利尿','安神']	1.5～5g	其他	消食药
辟汗草				凉			苦		辛								胃			脾	肝			['和中','健胃','解暑','化湿']	5～15g	其他	化湿药
篇蓄	微寒						苦												膀胱					['利尿','通淋','杀虫','止痒']	9～15g	利水渗湿药	利尿通淋药
片姜黄			温				苦		辛											脾	肝			['破血','行气','通经','止痛']	3～9g	活血化瘀药	活血调经药
平贝母	微寒						苦	甘			肺		心											['清热','润肺','化痰','止咳']	3～9g	化痰止咳平喘药	清化热痰药
蒲公英	寒						苦	甘									胃				肝			['清热','解毒','利尿','散结']	9～30g	清热药	清热解毒药
蒲黄					平			甘				心包									肝			['止血','化瘀','通淋']	4.5～9g	止血药	化瘀止血药
蒲黄炭					平			甘				心包									肝			['止血','化瘀','利尿','通淋']	5-10g	止血药	化淤止血药
七叶莲			温				微苦		辛														有毒	['祛风','止痛','活血','消肿']	9～15g	活血化瘀药	活血止痛药
七叶一枝花	微寒						苦														肝		有毒	['清热','解毒','消肿','止痛','凉肝','定惊']	3～10g	清热药	清热解毒药
荠菜				凉				甘											膀胱	脾	肝			['凉肝','止血','平肝','明目','清热','利湿']	15～30g	止血药	凉血止血药
荠苨	寒							甘			肺									脾				['润燥','化痰','清热','解毒']	5～10g	清热药	清热解毒药
蕲蛇			温					甘		咸											肝		有毒	['祛风','通络','止痉']	3~9g	祛风湿药	祛风寒湿药
千斤拔					平			甘													肝	肾		['祛风','除湿','强筋','壮骨','活血','解毒']	15～30g	杀祛风湿药	祛风湿强筋骨药
千金子			温						辛					大肠							肝	肾		['逐水','消肿','破血','消癥']	1.5～3g	泻下药	峻下逐水药
千里光	寒						苦				肺										肝			['清热','解毒','凉血','消肿','清肝','明目','杀虫','止痛']	9～15g	清热药	清热解毒药
千年健			温				苦		辛												肝	肾		['祛风湿','健筋骨']	4.5～9g	祛风湿药	祛风湿强筋骨药
千日红					平			甘			肺										肝			['化痰','止咳','平喘','清肝明目经止惊']	3～10g	化痰止咳平喘药	止咳平喘药
牵牛子	寒						苦				肺			大肠								肾		['泻水','通便','消痰','涤饮','杀虫','攻积']	3～6g	泻下药	润下药
铅丹	微寒								辛				心								肝		有毒	['拔毒','生肌','杀虫','止痒']	0.3~0.6g	其他	拔毒化腐生肌药
前胡	微寒						苦		辛		肺													['发表','镇痛','降气','化痰']	3～9g	解表药	辛凉解表药
芡实					平			甘												脾		肾		['益肾','固精','补脾','止泻','除湿','止带']	15～30g	收涩药	固精缩尿止带药
茜草	寒						苦														肝			['凉血','止血','祛瘀','通经']	6～9g	止血药	凉血止血药
羌活			温				苦		辛										膀胱			肾		['解表','散寒','祛风','除湿','止痛']	6～12g	解表药	辛温解表药
秦艽					平		苦		辛								胃	胆			肝			['祛风湿','退虚热','舒筋','止疼']	5～10g	祛风湿药	祛风湿清热药
秦皮	寒						苦							大肠				胆			肝			['清热','燥湿','收涩','明目']	6～12g	清热药	清热燥湿药
青黛	寒									咸											肝			['清热','凉血','定惊']	0.9~1.5g	清热药	清热凉血药
青风藤					平		苦		辛											脾	肝			['祛风湿','通经络','利小便']	6～12g	祛风湿药	祛风湿强筋骨药
青果					平	酸		甘			肺						胃							['清热','利咽','生津','解毒']	4.5~9g	清热药	清热解毒药
青蒿	寒						苦		辛									胆			肝			['清热','解毒','除骨蒸','截疟']	6～12g	清热药	清虚热药
青礞石					平			甘		咸	肺		心								肝			['坠痰','下气','平肝','镇惊']	3～6g	安神药	重镇安神药
青木香	寒						苦		辛		肺						胃				肝			['行气','止痛','解毒','消肿','平肝','降压']	3～9g	其他	理气药
青牛胆	寒						苦																	['清热','解毒','利咽','止痛']	3~9g	清热药	清热解毒药
青皮			温				苦		辛								胃	胆			肝			['疏肝','破气','消积','化滞']	3～10g	其他	理气药
青天葵				凉				甘			肺		心								肝			['润肺','止咳','清热','解毒']	9~15g	清热药	清热解毒药
青葙子	微寒						苦														肝			['清肝','明日','退翳']	9～15g	清热药	清热泻火药
青羊参			温					甘	辛				心							脾	肝			['祛风湿','强筋骨','健脾胃']	15～25g	祛风湿药	祛风湿强筋骨药
青叶胆	寒						苦	甘										胆	膀胱		肝			['清肝','利胆','清热','利湿']	10～15g	清热药	清热燥湿药
轻粉	寒								辛					大肠		小肠							有毒	['攻毒','杀虫','敛疮','逐水','通便']	0.1~0.2g	其他	拔毒化腐生肌药
苘麻子				凉			苦							大肠		小肠								['清热','解毒','利水','消肿','通乳','退翳']	5～10g	利水渗湿药	利水消肿药
瞿麦	寒						苦						心			小肠								['利尿','通淋','破血','通经']	9～15g	利水渗湿药	利尿通淋药
全蝎					平				辛												肝		有毒	['息风','镇痉','攻毒','散结','通络','止痛']	2.5～4.5g	平肝息风药	息风止痉药
拳参	微寒						苦				肺			大肠							肝			['清热','解毒','止血','消肿']	3～10g	清热药	清热解毒药
人参			温				微苦	甘			肺		心							脾		肾		['大补','元气','复脉','固脱','补脾','益肺','生津','安神']	3～9g	补虚药	补气药
人参叶	寒						苦	甘			肺						胃							['补气','益肺','祛暑','生津']	3～10g	补虚药	补气药
忍冬藤	寒							甘			肺						胃							['清热','解毒','疏风','通络']	9～30g	清热药	清热解毒药
日草根				凉				甘																['清热','利尿','消肿']	3～6g	利水渗湿药	利水消肿药
榕树叶	微寒						微苦				肺			大肠										['清热','祛湿','止咳','化痰','活血','散瘀','祛风','止痒']	9~15g	解表药	辛凉解表药
肉苁蓉			温					甘		咸				大肠								肾		['补肾阳','益精血','润肠','通便']	6～9g	补虚药	补阳药
肉豆寇			温						辛					大肠			胃			脾				['涩肠','止泻','温中','行气']	3～10g	收涩药	敛肺涩肠药
肉豆蔻			温						辛					大肠			胃			脾			有毒	['温中','行气','涩肠','止泻']	3~9g	收涩药	敛肺涩肠药
肉桂		大热						甘	辛				心							脾	肝	肾		['补火','助阳','引火','归元','散寒','止痛','温通','经脉']	1～4.5g	其他	温里药
乳香			温				苦		辛				心							脾	肝			['调气','活血','定痛','消肿','生肌']	3～9g	活血化瘀药	活血止痛药
蕤仁	微寒							甘													肝			['养肝','明目','疏风','散热']	5～9g	安神药	养心安神药
三白草	寒							甘	辛		肺								膀胱					['清热','解毒','利尿','消肿']	15～30g	清热药	清热解毒药
三分三			温				苦		辛														大毒	['解痉','镇痛','祛风','除湿']	0.6～0.9g	祛风湿药	祛风湿强筋骨药
三棵针	寒						苦							大肠			胃				肝		有毒	['清热','燥湿','泻火','解毒']	15～30g	清热药	清热燥湿药
三棱					平		苦		辛											脾	肝			['破血','行气','消积','止痛']	4.5～9g	活血化瘀药	破血消癥药
三七			温				微苦	甘									胃				肝			['散瘀','止血','消肿','定痛']	5～10g	止血药	化瘀止血药
三丫苦	寒						苦				肺						胃				肝			['清热','解毒','行气','止痛','燥湿','止痒']	15～30g	清热药	清热燥湿药
桑白皮	寒							甘			肺													['泻肺','平喘','利水','消肿']	6～12g	利水渗湿药	利水消肿药
桑寄生					平		苦	甘													肝	肾		['补肝肾','强筋骨','祛风湿','安胎元']	9～15g	祛风湿药	祛风湿强筋骨药
桑螵蛸					平			甘		咸											肝	肾		['益肾','固精','缩尿','止浊']	5～9g	收涩药	固精缩尿止带药
桑椹	寒					酸		甘					心								肝	肾		['补血','滋阴','生津','润燥']	9～15g	补虚药	补血药
桑叶	寒						苦	甘			肺										肝			['疏散','风热','清肺','润燥','清肝','明目']	5～9g	解表药	辛凉解表药
桑枝					平		苦														肝			['祛风湿','通经络','行水气']	15～30g	其他	理气药
沙棘			温			酸					肺		心				胃			脾				['祛痰','止咳','消食','化滞','活血','散瘀']	3～9g	其他	消食药
沙苑子			温					甘													肝	肾		['温补','肝肾','固精','缩尿','明目']	9～15g	补虚药	补阳药
砂仁			温						辛								胃			脾		肾		['化湿','开胃','温脾','止泻','理气','安胎']	3～6g	其他	化湿药
山慈菇				凉				甘	微辛											脾	肝			['清热','解毒','化痰','散结']	3～9g	清热药	清热解毒药
山大颜				凉			苦																	['清热','解毒','消肿','拔毒']	15~30g	其他	拔毒生肌药
山豆根	寒						苦				肺						胃						有毒	['清热','解毒','消肿','利咽']	3~6g	清热药	清热解毒药
山海螺					平			甘	辛		肺									脾				['益气','养阴','解毒','消肿','排脓','通乳']	15～60g	补虚药	补阴药
山甲	微寒									咸							胃				肝			['活血','消癥','通经','下乳','搜风','通络','消肿','排脓']	5～10g	活血化瘀药	破血消癥药
山菅兰			温						辛															['拔毒','消肿','散瘀','止痛']	---	其他	拔毒生肌药
山麦冬	微寒						微苦	甘			肺		心				胃							['养阴','润肺','益胃','生津','清心','除烦']	6～12g	补虚药	补阴药
山木通					平		苦		辛								胃			脾	肝			['祛风','活血','利尿','通淋']	15～30g	利水渗湿药	利尿通淋药
山柰			温						辛				心				胃							['行气','温中','消食','止痛']	6~9g	其他	温里药
山稔根					平		苦		辛											脾	肝			['解毒','利湿','活血','调经']	3-9g	活血化瘀药	活血调经药
山药					平			甘			肺									脾		肾		['补脾','养胃','生津','益肺','补肾','涩精']	15～30g	补虚药	补气药
山银花	寒							甘			肺		心				胃							['清热','解毒','凉散','风热']	6～15g	清热药	清热解毒药
山萸肉			微温			酸															肝	肾		['补益','肝肾','涩精','固脱']	6~12g	收涩药	固精缩尿止带药
山楂			微温			酸		甘									胃			脾	肝			['消食','健脾','行气','消瘀']	6～12g	其他	消食药
山楂叶					平	酸															肝			['活血','化瘀','理气','通脉','化浊','降脂']	3～10g	活血化瘀药	活血止痛药
山芝麻	寒						苦				肺			大肠										['清热','解毒','止咳']	15~30g	清热药	清热解毒药
山栀仁	寒						苦				肺		心		三焦									['泻火','除烦','清热','利湿','凉血','解毒','消肿','止痛']	6～11g	清热药	清热泻火药
山茱萸			微温			酸															肝	肾		['补益','肝肾','收涩','固脱']	6～12g	收涩药	固精缩尿止带药
商陆	寒						苦				肺			大肠						脾		肾	有毒	['逐水','消肿','通利','二便','解毒','散结']	3～9g	泻下药	峻下逐水药
芍药	微寒					酸	苦													脾	肝			['养血','调经','敛阴','止汗','柔肝','止痛','平抑肝阳']	6～15g	补虚药	补血药
蛇床子			温				苦		辛													肾		['温肾','壮阳','燥湿','祛风','杀虫']	3～9g	补虚药	补阳药
蛇莓	寒						苦	甘			肺			大肠							肝			['清热','凉血','消肿','解毒']	9～15g	清热药	清热解毒药
蛇蜕					平			甘		咸											肝			['祛风','定惊','解毒','退翳']	3～6g	平肝息风药	息风止痉药
射干	寒						苦				肺													['清热','解毒','消痰','利咽']	3～9g	清热药	清热解毒药
麝香			温						辛				心							脾				['开窍','醒神','活血','通经','消肿','止痛']	0.03～0.1g	其他	开窍药
伸筋草			温				苦		微辛															['祛风寒','除湿','消肿','舒筋','活络']	3～12g	祛风湿药	祛风湿强筋骨药
神曲			温					甘	辛								胃			脾				['消食','和胃']	6~15g	其他	消食药
肾茶				凉			微苦												膀胱			肾		['清热','祛湿','排石','利水']	50~100g	利水渗湿药	利尿通淋药
升麻	微寒							微甘	辛		肺			大肠			胃			脾				['发表','透疹','清热','解毒','升举','阳气']	3～9g	解表药	辛凉解表药
升药		热							辛		肺									脾			大毒	['拔毒','去腐']	---	其他	拔毒化腐生肌药
生地黄	寒							甘					心								肝	肾		['清热','凉血','养阴','生津']	9～15g	清热药	清热凉血药
生龟甲	微寒							甘		咸			心								肝	肾		['滋阴','潜阳','益肾','强骨','养血','补心','固经','止崩']	9～24g	补虚药	补阴药
生姜			微温						辛		肺						胃			脾				['散寒','解表','降逆','止呕','化痰','止咳','解鱼','蟹毒']	3～10g	解表药	辛温解表药
生姜皮				凉					辛		肺									脾				['行水','消肿']	2~6g	利水渗湿药	利水消肿药
生龙骨					平			甘					心								肝	肾		['镇惊','安神','平肝','潜阳','收敛','固涩']	15～30g	安神药	重镇安神药
生牡蛎	微寒									咸								胆			肝	肾		['潜阳','补阴','重镇','安神','软坚','散结','收敛','固涩','制酸','止痛']	9～30g	平肝熄风药	平抑肝阳药
生石膏	大寒							甘	辛		肺						胃							['清热','泻火','除烦','止渴']	15～60g	清热药	清热泻火药
生首乌			温、微温				苦	甘					心								肝	肾		['解毒','消痈','截疟','润肠','通便']	3～6g	补虚药	补血药
生铁落				凉					辛				心								肝			['平肝','镇惊']	30~60g	平肝息风药	平抑肝阳药
生苡仁				凉				甘			肺						胃			脾				['利水','渗湿','健脾','止泻','除痹','排脓','解毒','散结']	6～10g	利水渗湿药	利水消肿药
蓍草					平	酸	苦				肺								膀胱	脾				['清热','解毒','活血','通经']	3～10g	活血化瘀药	活血止痛药
十萼茄				凉																				['清热','解毒','祛痰','止咳','补虚']	25~50g	清热药	清热解毒药
石蝉草				凉			微苦				肺									脾	肝	肾		['清热','解毒','消肿','散瘀','止痛','利水']	50~100g	清热药	清热解毒药
石菖蒲			微温				苦		辛				心				胃							['开窍','豁痰','理气','活血','散风','去湿']	3～6g	其他	开窍药
石吊兰			温				苦				肺													['化痰','止咳','软坚','散结']	9～15g	化痰止咳平喘药	温化寒痰药
石膏	大寒							甘	辛		肺						胃							['清热','降火','除烦','止渴']	15～60g	清热药	清热泻火药
石斛	微寒							甘									胃					肾		['益胃','生津','滋阴','清热']	6～12g	补虚药	补阴药
石黄			温						辛					大肠							肝		有毒	['解毒','杀虫','燥湿','祛痰','截疟']	0.05～0.1g	其他	攻毒杀虫止痒药
石见穿					平		微苦													脾	肝			['清热','解毒','活血','镇痛']	6～15g	清热药	清热解毒药
石决明	寒									咸											肝			['平肝','潜阳','清肝','明目']	3~15g	平肝息风药	平抑肝阳药
石榴皮			温			酸								大肠										['涩肠','止泻','止血','驱虫']	3～9g	收涩药	敛肺涩肠药
石南藤			温						辛											脾	肝			['消肿','止痛','驱风寒','通经络']	6～15g	祛风湿药	祛风湿强筋骨药
石楠叶					平		苦		辛												肝	肾		['祛风湿','止痒','强筋骨','益肝肾']	3～10g	祛风湿药	祛风湿强筋骨药
石上柏				凉			微苦	甘			肺						胃				肝			['疏风','清肺','止咳','解毒','止痛','清肿','抗癌','利湿']	15～30g	清热药	清热解毒药
石蒜			温				苦		辛														有毒	['消肿','杀虫']	1~3g	其他	杀虫止痒药
石韦	微寒						苦	甘			肺								膀胱					['利尿','通淋','清热','止血']	5～10g	利水渗湿药	利尿通淋药
石苇	微寒						苦	甘			肺								膀胱					['利尿','通淋','清肺','止咳','凉血','止血']	6～12g	利水渗湿药	利尿通淋药
使君子			温					甘									胃			脾				['杀虫','消积']	9～12g	其他	驱虫药
柿蒂					平		苦										胃							['降逆','止呃','下气']	5～10g	其他	理气药
首乌藤					平			甘					心								肝			['养血','安神','祛风','通络']	9～15g	安神药	养心安神药
熟地黄			微温					甘													肝	肾		['补血','滋阴','益精','填髓']	10～30g	补虚药	补血药
蜀椒			温						辛				心							脾		肾	有毒	['温中','止痛','杀虫','止痒']	3—9g	温里药	温里药
蜀羊泉	寒						苦				肺										肝			['清热','解毒']	15-30g	清热药	清热解毒药
鼠李					平		微苦	甘													肝	肾		['止咳','祛痰']	5~15g	清热药	清热燥湿药
鼠曲草					平			甘			肺													['祛痰','止咳','平喘','祛风湿']	9~30g	化痰止咳平喘药	止咳平喘药
双参			温				苦						心							脾	肝	肾		['益肾','活血','调经']	15～30g	活血化瘀药	活血调经药
水半夏			温						辛		肺									脾			有毒	['燥湿','化痰','止咳','消肿']	6~9g	化痰止咳平喘药	温化寒痰药
水朝阳			微温				苦			咸													有毒	['祛风','明目','化痰','软坚','利水']	3~12g	解表药	辛温解表药
水飞蓟	寒						苦											胆			肝			['清热','解毒','保肝','利胆','保脑']	6～15g	清热药	清热解毒药
水河剑	寒						微苦																	['凉血','止血','利尿','通淋']	9~15g	止血药	凉血止血药
水红花子	微寒									咸							胃				肝			['消瘀','破积','健脾','利湿','全身','止痛']	15～30g	活血化瘀药	破血消癥药
水茴香			温					甘	辛		肺						胃			脾				['健脾','利湿','理气','化痰']	6~15g	其他	理气药
水牛角	寒						苦						心								肝			['清热','解毒','凉血','定惊']	15~30g	平肝息风药	息风止痉药
水翁花	寒						苦				肺						胃			脾				['清热','解暑','生津','止渴','去湿','消滞']	15~30g	清热药	清热泻火药
水蛭					平		苦			咸											肝		有毒	['破血','逐瘀','通经']	1.5~3g	活血化瘀药	活血调经药
丝瓜络					平			甘			肺						胃				肝			['活血','通络','祛风']	3～12g	活血化瘀药	活血止痛药
丝瓜藤	微寒						苦						心							脾		肾		['舒筋','活血','止咳','化痰','解毒','杀虫']	30-60g	活血化瘀药	活血疗伤药
四季青				凉			苦				肺			大肠					膀胱					['清热','解毒','消肿','祛瘀']	15～60g	清热药	清热解毒药
四块瓦			温						辛		肺										肝		有毒	['祛风','除湿','散瘀','止痛','解毒','消肿']	5~10g	祛风湿药	祛风湿散寒药
四叶参			温					甘			肺									脾				['补血','通乳','清热','解毒','消肿','排脓']	15～30g	清热药	清热解毒药
松花粉			温					甘												脾	肝			['燥湿','收敛','止血']	3～5g	止血药	收敛止血药
松节			温				苦		辛												肝	肾		['祛风湿','通络','止痛']	10~15g	祛风湿药	祛风寒湿药
松香			温				苦	甘												脾	肝			['祛风','燥湿','排脓','拔毒','生肌','止痛']	3～5g	清热药	清热泻火药
松子仁			温					甘			肺			大肠							肝			['润肠','通便','润肺','止咳']	10~15g	泻下药	润下药
苏合香			温						辛				心							脾				['开窍','辟秽','止痛']	0.3~1g	其他	开窍药
苏木					平			甘		咸			心							脾	肝			['行血','祛瘀','消肿','止痛']	3～9g	活血化瘀药	活血止痛药
苏叶			温						辛		肺						胃							['解表','散寒','行气','和胃']	5～10g	解表药	发散风寒药
苏子			温						辛		肺									脾				['降气','平喘','消痰','润肠']	3～9g	解表药	发散风寒药
酸枣仁					平	酸		甘					心					胆			肝			['补肝','宁心','敛汗','生津']	9～15g	安神药	养心安神药
娑罗子			温					甘									胃				肝			['理气','宽中','和胃','止痛']	3～9g	其他	理气药
锁阳			温					甘						大肠						脾		肾		['补肾阳','益精血','润肠','通便']	5～9g	补虚药	补阳药
太白参			温				微苦	甘												脾		肾		['滋阴','补肾','益气','健脾']	9～15g	补虚药	补阴药
太白米			微温				苦		辛		肺			大肠			胃			脾				['宽胸','利气','健胃','止呕','镇痛','止咳']	1.5～6g	其他	理气药
太子参					平		微苦	甘			肺									脾				['益气','健脾','生津','润肺']	9～30g	补虚药	补气药
檀香			温						辛		肺		心				胃			脾				['行气','温中','开胃','止痛']	2～5g	其他	理气药
桃胶					平		苦							大肠					膀胱					['活血','化瘀','止痢','通淋','止痛']	9～15g	活血化瘀药	活血止痛药
桃仁					平		苦	甘					心	大肠							肝			['活血','祛痰','润肠','通便']	4.5～9g	活血化瘀药	活血调经药
天冬	寒						苦	甘			肺											肾		['养阴','润燥','润肺','生津']	6～12g	补虚药	补阴药
天胡荽	寒						苦		辛									胆		脾		肾		['清热','利尿','解毒','消肿']	9～15g	清热药	清热解毒药
天花粉	微寒						微苦	甘			肺						胃							['清热','生津','消肿','排脓']	10～15g	清热药	清热泻火药
天葵子	寒						苦	甘									胃				肝			['清热','解毒','消肿','散结']	9～15g	清热药	清热解毒药
天麻					平			甘													肝			['平肝','息风','止痉']	3～9g	平肝息风药	息风止痉药
天南星			温				苦		辛		肺									脾	肝		有毒	['燥湿','化痰','祛风','解痉','散结','消肿']	3~10g	化痰药	温化寒痰药
天山雪莲			温				微苦																	['温肾','助阳','祛风','胜湿','通经','活血']	3～6g	补虚药	补阳药
天仙藤			温				苦													脾	肝	肾		['行气','活血','利水','消肿']	4.5～9g	活血化瘀药	活血止痛药
天仙子			温				苦		辛				心				胃				肝			['解痉','止痛','安神','定喘']	0.06～0.6g	安神药	养心安神药
天竺黄	寒							甘					心								肝			['清热','豁痰','凉心','定惊']	3～9g	化痰止咳平喘药	清化热痰药
甜茶				凉				甘											膀胱		肝	肾		['截疟','利尿','降压']	10～30g	利水渗湿药	利尿通淋药
甜地丁	寒						苦	甘					心								肝			['清热','解毒','凉血','消肿']	6～30g	清热药	清热解毒药
甜瓜蒂	寒						苦										胃			脾	肝			['涌吐','痰食','除湿','退黄']	3～6g	其他	涌吐药
甜瓜子	寒							甘			肺			大肠			胃							['清肺','润肠','化瘀','排脓','疗伤','止痛']	9～30g	活血化瘀药	活血止痛药
铁包金					平			甘			肺		心											['理肺','止咳','祛瘀','止痛','舒肝','退黄','健胃','消积']	15~30g	活血化瘀药	活血止痛药
铁皮石斛	微寒							甘									胃					肾		['益胃','生津','滋阴','清热']	6～12g	补虚药	补阴药
葶苈子	大寒						苦		辛		肺								膀胱					['泻肺','平喘','行气','消肿']	3～9g	化痰止咳平喘药	止咳平喘药
通草	微寒							甘			肺						胃							['清热','利尿','通气','下乳']	3～5g	利水渗湿药	利尿通淋药
透骨草			温						辛												肝	肾		['祛风','除湿','舒筋','活血','散瘀','消肿','解毒','止痛']	9～15g	祛风湿药	祛风湿强筋骨药
透骨香			温						辛		肺										肝	肾		['祛风','除湿','散寒','止痛','化痰','止咳']	9～15g	祛风湿药	祛风湿散寒药
土贝母	微寒						苦				肺									脾				['散结','消肿','解毒']	4.5～9g	其他	拔毒生肌药
土鳖虫	寒									咸											肝		有毒	['破瘀血','续筋骨']	3～9g	活血化瘀药	活血疗伤药
土大黄				凉			苦		辛															['清热','解毒','止血','祛瘀','通便','杀虫']	9～15g	清热药	清热解毒药
土党参					平			甘			肺									脾				['健脾','益气','补肺','止咳','下乳']	15～30g	补虚药	补气药
土茯苓					平			甘									胃				肝			['解毒','利尿','通利','关节']	15~60g	清热药	清热燥湿药
土荆芥			微温				苦		辛		肺								膀胱					['祛风','除湿','杀虫','止痒','活血','消肿']	3～9g	其他	杀虫止痒药
土荆皮			温						辛		肺									脾				['杀虫','止痒']	---	其他	杀虫止痒药
土木香			温				苦		辛											脾	肝			['健脾','和胃','调气','解郁','止痛','安胎']	3～9g	其他	理气药
土牛膝	微寒					酸	苦														肝	肾		['活血','化瘀','利尿','通淋','清热','解表']	10～15g	活血化瘀	活血调经药
土人参					平			甘			肺									脾				['补气','润肺','止咳','调经']	30～60g	补虚药	补气药
土三七			温				苦	甘																['破血','散瘀','止血','消肿']	10~15g	止血药	化淤止血药
兔儿伞			微温						辛															['活血','舒筋','祛风湿']	6～15g	祛风湿药	祛风湿散寒药
菟丝子					平			甘	辛											脾	肝	肾		['补肾','益精','养肝','明日']	10～15g	补虚药	补阳药
瓦楞子					平					咸	肺						胃				肝			['消痰','化瘀','软坚','散结','制酸','止痛']	9～15g	化痰止咳平喘药	清化热痰药
瓦松				凉		酸	苦				肺									脾	肝			['凉血','止血','解毒','敛疮']	5～15g	清热药	清热解毒药
王不留行					平		苦										胃				肝			['活血','通经','下乳','利尿','通淋']	5~10g	活血化瘀药	活血调经药
望江南	微寒						苦	甘		咸				大肠							肝			['清肝','明目','润肠','通便']	9～15g	清热药	清热泻火药
威灵仙			温						辛	咸									膀胱					['祛风','除湿','通络','止痛']	6～9g	祛风湿病	祛风湿散寒药
苇根	寒							甘			肺						胃							['清热','泻火','生津','止呕','止渴','除烦','利尿']	15～30g	清热药	清热泻火药
苇茎	寒							甘			肺		心											['清肺','生津']	25～50g	清热药	清热泻火药
委陵菜	寒						苦				肺			大肠							肝			['清热','解毒','凉血','止血']	9～15g	清热药	清热解毒药
问荆					平		苦				肺						胃				肝			['清热','凉血','止咳','利尿']	5~15g	清热药	清热凉血药
乌蔹莓	寒					酸	苦						心				胃				肝			['清热','解毒','利湿','消肿']	9～15g	清热药	清热燥湿药
乌梅					平	酸					肺			大肠						脾	肝			['敛肺','涩肠','生津','安蛔']	6～12g	收涩药	敛肺涩肠药
乌梢蛇					平			甘													肝			['祛风','通络','止痉']	9～12g	祛风湿药	祛风湿强筋骨药
乌药			温						辛		肺								膀胱	脾		肾		['顺气','开郁','散寒','止痛']	3～9g	其他	理气药
巫山淫羊藿			温					甘	辛												肝	肾		['补肾阳','强筋骨','祛风湿']	3~9g	补虚药	补阳药
无根藤				凉																				['清热','利湿','凉血','解毒']	9～10g	清热药	清热解毒药
无花果					平			甘			肺			大肠			胃							['健胃','清肠','消肿','解毒']	50～100g	清热药	清热解毒药
无患子				凉			苦		微辛		肺		心										有毒	['清肺','祛痰','利咽','行气','杀虫']	3～10g	清热药	清热解毒药
芜荑			温				苦		辛								胃			脾				['杀虫','消积']	3~10g	其他	驱虫药
吴茱萸		热					苦		辛								胃			脾	肝	肾	有毒	['散寒','止痛','降逆','止呕','助阳','止泻']	3～10g	其他	温里药
梧桐子					平			甘			肺		心									肾		['行气','健脾','消食','和中','止血']	5～10g	其他	消食药
蜈蚣			温						辛												肝			['息风','镇痉','攻毒','散结','通络','止痛']	3～5g	平肝息风药	息风止痉药
五倍子	寒					酸					肺			大肠								肾		['敛肺','降火','涩肠','止泻','敛肺','止血','收湿','敛疮']	3～10g	收涩药	敛肺涩肠药
五加皮			温				苦		辛												肝	肾		['祛风湿','补肝肾','强筋骨']	4.5～9g	祛风湿药	祛风湿强筋骨药
五灵脂			温					甘		咸											肝			['活血','止痛','化瘀','止血','消积','解毒']	5~10g	活血化瘀药	活血止痛药
五味子			温			酸		甘			肺		心									肾		['收敛','固涩','益气','生津','补肾','宁心']	2～6g	收涩药	敛肺涩肠药
五指毛桃			微温					甘			肺			大肠			胃			脾	肝			['益气','健脾','祛痰','平喘','行气','化湿','舒筋','活络']	15~30g	补虚药	补气药
西党参					平			甘			肺									脾				['健脾','益肺','养血','生津']	9～30g	补虚药	补气药
西番莲			温				苦				肺													['祛风','除湿','活血','止痛']	15～20g	活血化瘀药	活血止痛药
西瓜翠衣				凉				甘					心				胃		膀胱					['清热','解暑','利尿']	15～30g	清热药	清热解毒药
西瓜皮				凉				甘					心				胃		膀胱					['清热','解渴','利尿']	9～30g	清热药	清热泻火药
西河柳					平			甘	辛		肺		心				胃							['散风','解表','透疹']	3～6g	解表药	辛温解表药
西红花					平			甘					心								肝			['活血','化瘀','凉血','解毒','解郁','安神']	3～9g	活血化瘀药	活血调经药
西青果					平		苦	微甘			肺			大肠										['清热','生津','利咽','解毒']	3～9g	清热药	清热解毒药
西洋参				凉			微苦	甘			肺		心									肾		['补气','养阴','清热','生津']	3～6g	补虚药	补气药
菥蓂	微寒								辛					大肠			胃				肝			['清肝','明目','和中','利湿','解毒','消肿']	9～15g	利水渗湿药	利水消肿药
犀角	寒						苦														肝			['清热','凉血','解毒','定惊']	1.5-3g	清热药	清热凉血药
犀角尖	寒						苦						心								肝			['清热','凉血','解毒','定惊']	15～30g	清热药	清热凉血药
溪黄草	寒						苦							大肠				胆			肝			['清热','利湿','凉血','散瘀']	15~30g	清热药	清热燥湿药
豨莶草	寒						苦		辛												肝	肾		['祛风湿','利关节','解毒']	9～12g	祛风湿药	祛风湿强筋骨药
喜树果	寒						苦										胃			脾	肝			['抗癌','散结','破血','化瘀']	3～9g	活血化瘀药	破血消癥药
细辛			温						辛		肺		心									肾		['祛风','散寒','通窍','止痛','温肺','祛痰']	1～3g	解表药	辛温解表药
霞草	微寒							甘	辛												肝			['清热','凉血']	3～9g	清热药	清热凉血药
夏枯草	寒						苦		辛									胆			肝			['清火','明目','散结','消肿']	9～15g	清热药	清热泻火药
夏天无			温				苦		微辛												肝			['活血','通络','行气','止痛']	5～16g	活血化瘀药	活血止痛药
仙鹤草					平		苦						心								肝			['收敛','止血','截疟','止痢','解毒']	6～12g	止血药	收敛止血药
仙灵脾			温					甘	辛												肝	肾		['补肾阳','强筋骨','祛风湿']	6～10g	补虚药	补阳药
仙茅		热							辛											脾	肝	肾		['补肾阳','强筋骨','祛寒湿']	3～9g	补虚药	补阳药
仙人掌	寒						苦										胃							['行气','活血','凉血','止血','解毒','消肿']	10~30g	清热药	清热解毒药
相思子					平		苦						心	大肠			胃							['催吐','杀虫','消肿']	---	其他	杀虫止痒药
香豉				凉			苦		辛		肺						胃							['解表','除烦','宣发郁热']	6～12g	解表药	发散风热药
香附					平		微苦	微甘	辛						三焦						肝			['行气','解郁','调经','止痛']	6～9g	其他	理气药
香加皮			温				苦		辛				心								肝	肾		['祛风湿','壮筋骨','利小便']	5～10g	祛风湿药	祛风湿强筋骨药
香青蒿	寒						苦		辛									胆			肝			['清虚热','除骨蒸','解暑热','截疟','退黄']	6～12g	清热药	清虚热药
香薷			微温						辛		肺						胃							['发汗','解表','和中','利湿']	3～9g	解表药	辛温解表药
香玉竹	微寒							甘			肺						胃							['养阴','润燥','生津','止渴']	6～12g	补虚药	补阴药
香橼			温			酸	苦		辛		肺									脾	肝			['舒肝','理气','宽中','化痰']	3～9g	其他	理气药
小驳骨			温						辛												肝	肾		['祛瘀','止痛','续筋','接骨']	15~30g	祛风湿药	祛风湿强筋骨药
小飞扬草				凉		酸																		['清热','解毒','利湿','止痒']	15~50g	清热药	清热解毒药
小茴香			温						辛								胃			脾	肝	肾		['祛寒','止痛','理气','和胃']	3～6g	其他	温里药
小蓟				凉			苦	甘					心								肝			['凉血','止血','祛瘀','消肿']	4.5～9g	止血药	凉血止血药
小麦	微寒							甘					心											['养心','除烦']	20-60g	收涩药	固表止汗药
小通草	寒							甘			肺						胃							['清热','利尿','下乳']	2.5～4.5g	利水渗湿药	利尿通淋药
小叶莲					平			甘																['调经','活血']	3~9g	活血化瘀药	活血调经药
缬草			温					甘	辛				心								肝			['安神','理气','活血','止痛']	3~6g	安神药	养心安神药
薤白			温				苦		辛		肺		心	大肠			胃							['通阳','散结','行气','导滞']	5～9g	其他	理气药
蟹爪	寒									咸											肝			['破血','消积','堕胎']	30-60g	活血化淤药	破血消癥药
辛夷			温						辛		肺						胃							['散风寒','通鼻窍']	3～9g	解表药	辛温解表药
杏仁			微温				苦				肺			大肠									小毒	['降气','止咳','平喘','润肠','通便']	4.5～9g	化痰止咳平喘药	止咳平喘药
雄黄			温						辛					大肠							肝			['解毒','杀虫','燥湿','祛痰','截疟']	0.05～0.1g	其他	杀虫止痒药
熊胆	寒						苦						心					胆			肝			['清热','解毒','清肝','明目']	0.15～0.3g	清热药	清热解毒药
徐长卿			温						辛								胃				肝			['祛风','化湿','行气','通络']	3～12g	祛风湿药	祛风湿强筋骨药
续断			微温				苦		辛												肝	肾		['补肝肾','强筋骨','续折伤','止崩漏']	9～15g	补虚药	补阳药
萱草根				凉				甘											膀胱	脾	肝		有毒	['清热','利湿','凉血','止血','解毒','消肿']	6～9g	止血药	凉血止血药
玄参	微寒						苦	甘		咸	肺						胃					肾		['凉血','滋阴','泻火','解毒']	9～15g	清热药	清热凉血药
玄胡索			温				苦		辛				心							脾	肝			['活血','止痛','行气']	3～10g	活血化瘀药	活血止痛药
旋覆花			微温				苦		辛	咸	肺						胃							['降气','消痰','行水','止呕']	3～9g	化痰止咳平喘药	温化寒痰药
雪莲花			温				微苦	甘													肝	肾		['祛风湿','补肝阳','强筋骨','调经','止血']	6~12g	祛风湿药	祛风湿强筋骨药
雪上一支蒿			温				苦		辛												肝		大毒	['祛风湿','活血','止痛']	0.02~0.04g	祛风湿药	祛风寒湿药
血竭					平			甘		咸			心								肝			['祛瘀','定痛','止血','生肌']	1～2g	止血药	化瘀止血药
血余炭					平		苦										胃				肝			['收敛','止血','化瘀','利尿']	5～10g	止血药	收敛止血药
寻骨风					平		苦		辛								胃				肝			['祛风','通络','行气','止痛']	10~15g	祛风湿药	祛风湿强筋骨药
荨麻			温				苦		辛														有毒	['祛风','定惊','消食','通便']	3～9g	平肝息风药	息风止痉药
鸦胆子	寒						苦							大肠							肝		有毒	['清热','解毒','截疟','止痢','腐蚀','赘疣']	0.5～2g	清热药	清热解毒药
鸭脚木皮				凉			苦				肺													['发汗','解表','清热','解毒','散瘀','消肿','祛风','除湿']	15~30g	解表药	辛凉解表药
鸭跖草	寒							甘			肺						胃		膀胱					['清热','解毒','利水','消肿']	15～30g	清热药	清热解毒药
亚麻子					平			甘			肺			大肠							肝			['润燥','祛风']	9～15g	泻下药	润下药
延胡索			温				苦		辛											脾	肝			['活血','散瘀','理气','止痛']	3～9g	活血化瘀药	活血止痛药
岩参					平				辛															['行气','止痛','止泻痢']	3～15g	其他	理气药
岩黄莲				凉			苦																	['清利','湿热','散瘀','消肿']	3~15g	活血化瘀药	活血疗伤药
岩椒草				凉			苦		辛		肺						胃				肝			['解表','截疟','活血','解毒']	9～15g	解表药	辛凉解表药
盐蛇干	寒									咸											肝			['祛风','定惊','解毒','散结']	2～5g	平肝息风药	息风止痉药
燕窝					平			甘			肺						胃					肾		['养阴','润燥','益气','补中']	3～9g	补虚药	补阴药
羊耳菊			温				微苦	甘	辛															['祛风','利湿','行气','利湿','解毒','消肿']	15～30g	利水渗湿药	利水消肿药
羊红膻			温					甘	辛		肺		心							脾		肾		['温肾','助阳','活血','化瘀','养心','安神','温肺','散寒']	10~15g	补虚药	补阳药
羊蹄	寒						苦						心	大肠							肝		有毒	['清热','通便','利水','止血','杀虫']	10～15g	止血药	凉血止血药
羊蹄草				凉			微苦																	['清热','解毒','消炎','利尿']	15～30g	清热药	清热解毒药
阳起石			温							咸												肾		['温肾','壮阳']	3～5g	补虚药	补阳药
洋金花			温						辛		肺										肝		有毒	['平喘','止咳','镇痛','解痉']	0.3～0.6g	化痰止咳平喘药	止咳平喘药
野菊花	微寒						苦		辛				心								肝			['清热','解毒','消肿','凉肝','明目']	9～15g	清热药	清热泻火药
野马追					平		苦				肺													['化痰','止咳','平喘']	30～60g	化痰止咳平喘药	止咳平喘药
野棉花	寒						苦																有毒	['清热','利湿','杀虫','散瘀']	6～12g	清热药	清热燥湿药
叶下珠	寒						微苦													脾	肝			['清热','解毒','止泻','平肝','明目']	15~30g	清热药	清热解毒药
叶象花	寒						苦														肝			['凉血','调经','散瘀','消肿']	3～9g	止血药	温经止血药
一点血	微寒						苦	甘													肝	肾		['补气','养血','散瘀','止血']	15～30g	止血药	化瘀止血药
一支箭	微寒						苦	甘													肝			['清热','解毒','活血','祛瘀']	15～30g	清热药	清热解毒药
一枝黄花				凉			苦		辛		肺										肝			['疏风','清热','解毒','消肿','止痛']	10～15g	解表药	辛凉解表药
伊贝母	微寒						苦	甘			肺		心											['清热','润肺','化痰','止咳']	3~9g	化痰止咳平喘药	止咳平喘药
饴糖			温					甘			肺						胃			脾				['补中','益气','缓急','止痛','润肺','止咳']	15-20g	补益药	补气药
益母草	微寒						苦		辛				心						膀胱		肝			['活血','调经','利尿','消肿']	9～30g	活血化瘀药	活血调经药
益智			温						辛											脾		肾		['温脾','止泻','摄唾','暖肾','固精','缩尿']	3～9g	收涩药	固精缩尿止带药
益智仁			温						辛											脾		肾		['暖肾','固精','缩尿','温脾','开胃','摄唾']	3~10g	补虚药	补阳药
薏苡仁				凉				甘			肺						胃			脾				['健脾','利湿','除痹','止泻','清热','排脓']	10～30g	利水渗湿药	利尿通淋药
翼首草	寒						苦																	['解毒','除瘟','清热','止痢','祛风','通痹']	1～3g	清热药	清热解毒药
阴香根			温					微甘	辛															['祛风','散寒','温中','止痛','止血']	3～10g	其他	温里药
阴香皮			温					甘	辛					大肠			胃				肝	肾		['温中','止痛','祛风','散寒','解毒','消肿','止血']	6～9g	其他	温里药
茵陈	微寒						苦		辛								胃		膀胱	脾				['清湿热','退黄疸']	6～15g	利水渗湿药	利湿退黄药
茵陈蒿	微寒				平		苦										胃	胆		脾	肝			['清热','利湿','利胆','退黄']	10-30g	清热药	清热利湿药
银柴胡	微寒							甘									胃				肝			['清虚热','除疳热']	3～10g	收涩药	敛肺涩肠药
银耳					平			甘			肺						胃					肾		['润肺','生津','滋阴','养胃']	3～9g	补虚药	补阴药
银花	寒							甘			肺		心				胃							['清热','解毒','疏散风热']	6～15g	清热药	清热解毒药
银杏叶					平		苦	甘			肺		心											['敛肺','平喘','活血','化瘀','止痛']	9～12g	收涩药	敛肺涩肠药
淫羊藿			温					甘	辛												肝	肾		['补肾阳','强筋骨','祛风湿']	3～9g	补虚药	补阳药
罂粟壳					平	酸					肺			大肠								肾		['敛肺','涩肠','止痛']	3～6g	收涩药	敛肺涩肠药
樱桃核			温						辛		肺													['发表','透疹','消瘤','去瘢','行气','止痛']	5～15g	解表药	辛温解表药
鹰不泊			微温				苦		辛		肺						胃							['祛风','消肿','行气','止痛','利湿','退黄']	9~15g	利水渗湿药	利水消肿药
迎春花					平		苦		微辛										膀胱			肾		['清热','解毒','活血','消肿']	10～15g	清热药	清热解毒药
油松节			温				苦		辛												肝	肾		['祛风','除湿','通络','止痛']	9～15g	祛风湿药	祛风湿强筋骨药
余甘子				凉		酸		甘			肺						胃							['清热','凉血','消食','健胃','生津','止咳']	3～9g	其他	消食药
鱼腥草	微寒								辛		肺													['清热','解毒','消痈','排脓','利尿','通淋']	15～25g	清热药	清热解毒药
禹白附			温					甘	辛								胃				肝		有毒	['祛风痰','止痉','上痛','解毒','散结']	3~5g	化痰药	温化寒痰药
禹余粮	微寒							甘						大肠			胃							['涩肠','止泻','收敛','止血']	10～15g	收涩药	敛肺涩肠药
禹州漏芦	寒						苦										胃							['清热','解毒','排脓','止血','消痈','下乳']	4.5~9g	清热药	清热解毒药
玉米须					平			甘									胃	胆			肝	肾		['利尿','消肿','降压']	15～30g	利水渗湿药	利水消肿药
玉叶金花				凉			微苦	甘												脾	肝			['清热','疏风','凉血','解毒']	15～30g	清热药	清热解毒药
玉竹	微寒							甘			肺						胃							['养阴','润燥','生津','止渴']	6～12g	补虚药	补阴药
郁金	寒						苦		辛		肺		心								肝			['活血','止痛','行气','化疥','清心','解郁','利胆','退黄']	3～9g	活血化瘀药	活血止痛药
郁李仁					平		苦	甘	辛					大肠		小肠				脾				['缓泻','利尿']	3～9g	泻下药	润下药
预知子	寒						苦										胃	胆	膀胱		肝			['疏肝','理气','活血','止痛','除烦','利尿']	5～30g	活血化瘀药	活血止痛药
御米壳					平	酸					肺			大肠								肾	有毒	['敛肺','涩肠','止痛']	3～6g	收涩药	敛肺涩肠药
芫花			温				苦		辛		肺									脾		肾		['泻水','逐饮','外用','杀虫','疗疮']	1.5～3g	泻下药	峻下逐水药
芫荽子					平				辛		肺						胃							['发表','透疹','健胃']	10～15g	解表药	辛温解表药
远志			温				苦		辛		肺		心									肾		['安神','益智','祛痰','消肿']	3～9g	安神药	养心安神药
月季花			温					甘													肝			['活血','调经','疏肝','解郁']	1.5～4.5g	活血化瘀药	活血调经药
粤丝瓜络					平			甘			肺						胃				肝			['除湿火','通脉络']	4.5~9g	清热药	清热凉血药
云茯苓					平			甘			肺		心							脾		肾		['利水','渗湿','健脾','宁心']	10～15g	利水渗湿药	利水消肿药
云苓					平			甘			肺		心							脾		肾		['利水','渗湿','健脾','宁心']	10～15g	利水渗湿药	利水消肿药
芸薹子					平			甘	辛					大肠							肝			['活血','化瘀','消肿','散结','润肠','通便']	5～10g	活血化瘀药	活血调经药
枣仁			温					甘					心				胃			脾				['补中','益气','养血','安神']	6～15g	补虚药	补气药
皂矾				凉		酸														脾	肝			['解毒','燥湿','杀虫','补血']	0.8～1.6g	其他	攻毒杀虫止痒药
皂荚			温						辛	咸	肺			大肠									小毒	['祛顽痰','通窍','开闭','祛风','杀虫']	1.5~5g	化痰药	温化寒痰药
皂角			温						辛	咸	肺			大肠									有毒	['开窍','祛痰','散结','消肿','润燥','通便']	1～1.5g	其他	涌吐药
皂角刺			温						辛								胃				肝			['消肿','托毒','排脓','杀虫']	3～9g	其他	杀虫止痒药
皂角剌			温						辛								胃				肝			['消肿','托毒','排脓','杀虫']	3～10g	攻毒杀虫止痒药	攻毒杀虫止痒药
灶心土			温						辛								胃			脾				['温经','止血','止呕','止泻']	15~30g	止血药	温经止血药
泽兰			微温				苦													脾	肝			['行血','利尿','散郁','舒肝']	4.5～9g	活血化瘀药	活血调经药
泽漆	微寒						苦		辛					大肠		小肠				脾			有毒	['利水','消肿','化痰','止咳','解毒','杀虫']	3～9g	利水渗湿药	利水消肿药
泽泻	寒							甘											膀胱			肾		['利小便','清湿热']	6～13g	利水渗湿药	利尿通淋药
楂曲			温					甘	辛								胃			脾				['消食','和胃']	6～15g	其他	消食药
樟柳头	寒								辛														有毒	['利水','消肿','清热','解毒']	3～6g	利水渗湿药	利水消肿药
樟木			温						辛											脾	肝			['祛风','散寒','温中','理气','活血','通络']	10～20g	其他	温里药
樟脑		热							辛				心							脾			有毒	['开窍','辟秽','除湿','杀虫','温散','止痛']	0.1～0.2g	其他	开窍药
长春花	寒						苦																	['解毒','抗癌','清热','平肝']	5～10g	清热药	清热解毒药
掌叶半夏			温				苦		辛		肺									脾	肝		有毒	['燥湿','化痰','祛风','止痉','散结','消肿']	3~9g	化痰止咳平喘药	温化寒痰药
赭石	寒						苦				肺		心				胃				肝			['平肝','潜阳','重镇','降逆','凉血','止血']	15～30g	平肝息风药	平抑肝阳药
浙贝母	寒						苦				肺		心											['清热','散结','化痰','止咳']	4.5～9g	化痰止咳平喘药	清化热痰药
珍珠	寒							甘		咸			心								肝			['安神','定惊','明目','消翳','解毒','生肌']	0.1～0.3g	安神药	重镇安神药
珍珠菜					平				辛															['活血','调经','利湿','健脾','解毒','消肿']	15～30g	活血药	活血调经药
珍珠草				凉			苦	甘			肺										肝			['利湿','退黄','清热','解毒','明目','消积']	15~30g	利水渗湿药	利湿退黄药
珍珠母	寒									咸			心								肝			['平肝','潜阳','定惊','明目']	10～25g	平肝息风药	平抑肝阳药
知母	寒						苦	甘			肺						胃					肾		['清热','泻火','生津','润燥']	6～12g	清热药	清热泻火药
栀子	寒						苦				肺		心		三焦									['泻火','除烦','清热','利尿','凉血','解毒','消肿','止痛']	6～10g	清热药分类	清热泻火药
栀子皮	寒						苦				肺		心		三焦									['泻火','除烦','清热','利湿','凉血','解毒','消肿','止痛']	6-10g	清热药	清热泻火药
蜘蛛香			温				微苦		辛				心				胃			脾				['理气','止痛','消食','止泻','祛风','除湿','镇惊','安神']	3～6g	其他	理气药
枳椇子					平			甘									胃							['止渴','除烦','清湿热','解酒毒']	4.5～9g	利水渗湿药	利尿通淋药
枳壳			温			酸	苦		辛								胃			脾				['理气','宽中','行滞','消胀']	3～9g	其他	理气药
枳实	微寒					酸	苦		辛								胃			脾				['破气','消积','化痰','散痞']	3～9g	其他	理气药
制乳香			温				苦		辛				心							脾	肝			['活血','定痛','消肿','生肌']	3～5g	活血化瘀药	活血止痛药
制首乌			微温				苦	甘					心								肝	肾		['补肝肾','益精血','乌须发','强筋骨','化浊','降脂']	6～12g	补益药	补阴药
炙甘草			温					甘			肺		心				胃			脾				['补脾','和胃','益气','复脉']	2～10g	补虚药	补气药
炙黄芪			温					甘			肺									脾				['益气','补中']	9～30g	补虚药	补气药
钟乳石			温					甘			肺						胃					肾		['温肺','助阳','平喘','制酸','通乳']	3~9g	补虚药	补阳药
肿节风					平		苦		辛				心								肝			['清热','凉血','活血','消斑','祛风','通络']	9～30g	清热药	清热凉血药
重楼	微寒						苦														肝		有毒	['清热','解毒','消肿','止痛','凉肝','定惊']	3～9g	清热药	清热解毒药
朱茯神					平			甘			肺		心							脾		肾		['宁心','安神']	10～15g	利水渗湿药	利水消肿药
朱砂	微寒							甘					心										有毒	['清心','镇惊','安神','解毒']	0.1～0.5g	安神药	重镇安神药
朱砂根				凉			苦		辛		肺										肝			['解毒','消肿','活血','止痛','祛风','除湿']	10～15g	清热药	清热解毒药
珠子参	寒						苦	甘			肺						胃				肝			['清肺','养阴','散瘀','止血']	3～9g	止血药	化瘀止血药
猪胆粉	寒						苦				肺			大肠				胆			肝			['清热','润燥','解毒','止咳','平喘']	0.3～0.6g	化痰止咳平喘药	止咳平喘药
猪苓					平			甘											膀胱			肾		['利尿','渗湿']	6～12g	利水渗湿药	利尿通淋药
猪牙皂			温						辛	咸	肺			大肠									有毒	['开窍','祛痰','散结','消肿']	1～1.5g	化痰止咳平喘药	温化寒痰药
竹节参			温				微苦	甘			肺									脾	肝			['滋补','强壮','散瘀','止痛','止血','祛痰']	3～10g	补虚药	补气药
竹沥	寒						苦	甘			肺		心								肝			['清热','降火','滑痰','利窍']	30～60g	清热药	清热泻火药
竹茹	微寒							甘									胃	胆		脾				['清热','化痰','除烦','止呕']	4.5～9g	化痰止咳平喘药	清化热痰药
竹叶	寒							甘	辛				心			小肠	胃							['清热','泻火','除烦','利尿','生津']	6~15g	清热药	清热泻火药
竹叶椒			温				微苦		辛								胃			脾				['温中','燥湿','散寒','止痛','驱虫','止痒']	6～9g	其他	温里药
竹叶卷心	寒							甘					心			小肠	胃							['清热','泻火','除烦','止渴','利尿','通淋']	6～10g	清热药	清热泻火药
竹叶心	寒							甘	辛				心			小肠	胃							['清热','泻火','除烦','清心','利尿']	6-15g	清热药	清热泻火药
苎麻根	寒							甘					心						膀胱		肝			['凉血','止血','清热','安胎','利尿','解毒']	5～30g	止血药	凉血止血药
梓实					平			甘											膀胱			肾		['利尿','消肿']	9-15g	利水渗湿药	利水消肿药
紫贝齿					平					咸											肝			['镇惊','安神','平肝','明目']	10～15g	平肝息风药	平抑肝阳药
紫背天葵子	寒						苦	甘									胃				肝			['清热','解毒','消肿','散结']	9～15g	清热药	清热解毒药
紫草	寒							甘		咸			心								肝			['凉血','活血','解毒','透疹']	5～9g	清热药	清热凉血药
紫草茸					平			甘		咸										脾	肝			['清热','凉血','解毒']	3～10g	清热药	清热解毒药
紫浮萍	寒								辛		肺								膀胱					['宣散风热','透疹','止痒','利尿','消肿']	3～9g	解表药	发散风热药
紫河车			温					甘		咸	肺		心									肾		['温肾','补精','养血','益气']	2～3g	补虚药	补气药
紫花地丁	寒						苦		辛				心								肝			['清热','解毒','凉消肿']	15～30g	清热药	清热解毒药
紫花前胡	寒						苦		辛		肺													['降气','化痰','散风','清热']	3～9g	解表药	辛凉解表药
紫梢花			温					甘														肾		['补肾','助阳','固精','缩尿']	1.5～4.5g	补虚药	补阳药
紫石英			温					甘			肺		心									肾		['镇静','安神','温肺','暖官']	9～15g	安神药	重镇安神药
紫苏			温						辛		肺									脾				['解表','散寒','行气','宽中']	5~9g	解表药	发散风寒药
紫苏梗			温						辛		肺									脾				['理气','宽中','止痛','安胎']	5～9g	其他	理气药
紫苏叶			温						辛		肺									脾				['解表','散寒','行气','和胃']	5～10g	解表药	辛温解表药
紫苏子			温						辛		肺													['降气','化痰','止咳','平喘','润肠','通便']	3～10g	泻下药	润下药
紫菀			微温				苦	甘	辛		肺													['润肺','化痰','止咳']	5~10g	化痰药	止咳平喘药
紫玉簪					平			甘			肺											肾	有毒	['拔脓','解毒','生肌']	9～15g	拔毒化腐生肌药	拔毒化腐生肌药
紫苑			温				苦		辛		肺													['润肺','下气','消痰','止咳']	5～9g	化痰止咳平喘药	止咳平喘药
紫珠				凉			苦				肺						胃				肝			['收敛','止血']	10~15g	止血药	收敛止血药
紫珠叶				凉			苦				肺						胃				肝			['收敛','止血','清热','解毒']	10～15g	其他	收敛止血药
自然铜					平				辛												肝			['散瘀','接骨','止痛']	3～9g	活血化瘀药	活血止痛药
棕边炭					平		苦				肺			大肠							肝			['收敛','止血']	3～9g	止血药	收敛止血药
棕榈					平		苦				肺			大肠							肝			['收敛','止血','止痢','止带']	3～9g	止血药	收敛止血药
棕榈炭					平		苦				肺			大肠							肝			['收敛','止血']	3~10g	止血药	收敛止血药
走马箭			温			酸		甘																['祛风','除湿','活血','散瘀']	6~12g	祛风湿药	祛风湿热药
走马胎			温						辛											脾	肝			['祛风湿','壮筋骨','活血','祛瘀']	9~15g	祛风湿药	祛风湿强筋骨药
醉鱼草																								['止咳','定喘','活血','祛瘀','驱虫']	10～30g	活血化瘀药	活血止痛药
酢浆草	寒					酸					肺								膀胱		肝			['清热','利湿','凉血','散瘀','解毒','消肿']	10～30g	清热药	清热燥湿药
金汁	寒						苦																	化五脏热毒	适量	清热药	清热泻火药
胆草	寒						苦		辛		肺										肝			凉血，清热，利水，解毒	9-15克	清热药	清热凉血药
九节菖蒲			温						辛				心							脾	肝		小毒	化痰开窍、祛风除湿、消食醒脾、解毒。	1.5-6g	其他	化痰药
象皮粉			温					甘		咸									膀胱	脾				生肌敛疮	外用适量	其他	拔毒生肌药
玄明粉	寒						苦			咸				大肠			胃							泻热通便，润燥软坚，清火消肿	3～9g	泻下药	攻下药
醋			温			酸	苦										胃				肝			活血化瘀，开胃消食，消肿软坚，散瘀破结	适量	消食药	消食药
白杨叶																								祛风止痛；解毒敛疮。	适量	祛风湿药	祛风湿热药
金钱莲				凉				甘			肺								膀胱		肝	肾		清热凉血、袪风利湿、强心利尿、固肾、平肝	3-6g	清热药	清热凉血药
荷蒂					平		苦																	和胃安胎，止血止带	4-10只	止血药	收敛止血药
陈米					平			甘									胃							养胃利小便		利水渗湿药	利尿通淋药
石莲子							微苦	甘					心				胃			脾				清湿热，开胃进食，清心宁神，涩精止泄	9-12g	清热药	清热燥湿药
白檀			温						辛		肺						胃			脾				理气，散寒，和胃，止痛	1.5～4.5g
假蒟			温				苦				肺		心	大肠						脾				祛风散寒；行气止痛；活络；消肿	9-15g	解表药	辛温解表药
山羊角	寒									咸			心								肝			镇静清热、去翳明目、活血止血	3-6g	活血药	活血止血药
地精草				凉					辛												肝			清热平肝	6-9g	平肝息风药	平抑肝阳药
麦麸	寒							甘									胃			脾				止汗，止泻，散瘀	9～15g	收涩药	敛肺止泻药
银箔	大寒				平				辛				心								肝			安神镇惊		安神药	重镇安神药
海粉	寒							甘		咸	肺											肾		清热养阴；软坚消痰	30-60g	清热药	清热泻火药
酱	寒									咸							胃			脾		肾		清热解毒	适量	清热药	清热解毒药
荆沥				凉				甘					心								肝			除风热，化痰涎，通经络，行气血	30-60ml	清热药	清热泻火药
鸡子黄					平			甘					心									肾		['滋阴','润燥','养血','息风']	10～20g	补益药	补阴药
制马前子			温				苦													脾	肝			['通络','止痛','散结','消肿']	0.3～0.6g	祛风湿药	祛风寒湿药
毛冬青				凉			苦		辛		肺		心											['活血','通脉','清热','解毒']	15～30g	清热药	清热解毒药
淡菜			温					甘		咸											肝	肾		['补肝肾','益精血','消瘿瘤']	15～30g	补益药	补阴药
冰糖					平			甘			肺									脾				['健脾','和胃','润肺'，'止咳']	10～15g	化痰平喘止咳药	温化寒痰药
猪脊髓					平			甘													肝	肾		['补精髓','益肾阴']	10～15g	补益药	补阴药
虎骨			温					甘	辛												肝	肾		['祛风','通络','强筋','健骨']	9～18g	祛风湿药	祛风湿强筋骨药
六月雪				凉			苦		辛											脾	肝			['清热','解毒','祛风','利湿']	9～15g	清热药	清热解毒药
棉子油		热							辛				心				胃						微毒	['治恶疮','疗疥癣']	0.1～0.3g	拔毒化腐生肌药	拔毒化腐生肌药
黄蜡			微温					甘												脾				['解毒','敛疮','生肌','止痛']	3～6g	拔毒化腐生肌药	拔毒化腐生肌药
石橄榄				凉				甘												脾	肝	肾		['清热','养阴'，'化痰','止咳'，'润肺','生津'，'利湿'，'消瘀']	9～15克	化痰平喘止咳药	清热化痰药
桃叶					平		苦		辛											脾		肾		['祛风','清热'，'燥湿','解毒'，'杀虫']	3～6g	清热药	清热解毒药
藤梨根					平						肺			大肠							肝			['清热','利湿','解毒','消肿','抗癌','抗肿瘤','祛风','除湿','利尿','止血']	20～40g	清热药	清热解毒药
山芋					平			甘												脾		肾		['补中','和血','益气','生津','宽肠','通便']	10～15g	补益药	补血药
钟乳			温					甘			肺						胃					肾		['温肺'，'助阳'，'平喘'，'制酸']	3～9g	补益药	补阳药
荜薢					平		苦										胃		膀胱		肝			['祛风湿','利湿浊']	10～15g	祛风湿药	祛风寒湿药
龙牙偬木					平		微苦	甘	辛				心							脾	肝	肾	小毒	['健胃','利水'，'祛风','除湿'，'活血','止痛']	15～30g	祛风湿药	祛风寒湿药
松脂			温				苦													脾				['祛风'，'杀虫']	3～6g	攻毒杀虫止痒药	攻毒杀虫止痒药
干地黄	微寒						苦	甘					心								肝	肾		滋阴清热，凉血补血
北黄芪			微温					甘			肺									脾				['补气','固表','利尿','托毒','排脓','生肌']	9～30g	补虚药	补气药
炙远志			温				苦		辛		肺		心									肾		['安神','益智','祛痰','消肿']	3～9g	安神药	养心安神药
紫丹参	微寒						苦						心								肝			['祛瘀','止痛','活血','痛经','清心','除烦']	9～15g	活血化瘀药	活血调经药
白蔻仁			温						辛		肺						胃			脾				['化湿','行气','温中','止呕','开胃','消食']	3～6g	其他	化湿药
熟大黄	寒						苦					心包	心	大肠			胃			脾	肝			['泻热','通便','凉血','解毒','逐瘀','通经']	3～30g	泻下药	攻下药
川木瓜			温			酸														脾	肝			['平肝','舒筋','和胃','化湿']	6～9g	祛风湿药	祛风湿强筋骨药
白菊花	微寒						苦	甘			肺										肝			['散风','清热','平肝','明目']	5～9g	解表药	辛凉解表药
绿茶	微寒						苦	甘			肺		心				胃							['清上','除烦','化痰','消食','利尿','清热','解毒',]	1-3g	其他	其他
莲米					平			甘					心							脾		肾		['补脾','止泻','益肾','固精','养心','安神']	6～15g	收涩药	固精缩尿止带药
石楠藤			温						辛											脾	肝			['祛风','除湿','舒筋','强骨','除痹']	5～15g	祛风湿药	祛风湿强筋骨药
炙僵蚕					平				辛	咸	肺						胃				肝			['祛风','定惊','化痰','散结']	5～9g	平肝息风药	息风止痉药
广地龙	寒									咸									膀胱	脾	肝			['清热','定惊','通络','平喘','利尿']	4.5～9g	平肝息风药	息风止痉药
全蝎粉					平				辛												肝		有毒	['息风','镇痉','攻毒','散结','通络','止痛']	2.5～4.5g	平肝息风药	息风止痉药
苦蒌根	寒						微苦	甘			肺			大肠			胃							['清热','涤痰','宽胸','散结','润燥','滑肠']	9～15g	化痰止咳平喘药	清化热痰药
川椒		热							辛					大肠			胃						有毒	['温中','散寒','下气','消痰']	0.1～0.5g	其他	温里药
生杜仲			温					甘													肝	肾		['补肝肾','强筋骨','安胎']	6～9g	补虚药	补阳药
茯神木					平			甘					心							脾				['宁心','安神','利水']	9～15g	安神药	养心安神药
红人参			温				微苦	甘			肺		心							脾		肾		['大补','元气','复脉','固脱','益气','摄血']	3～9g	补虚药	补气药
甘枸杞子					平			甘													肝	肾		['滋补','肝肾','益精','明目']	6～12g	补虚药	补阴药
制马钱子			温				苦													脾	肝		有毒	['清肺','利咽','止血']	0.2～0.6g	活血化瘀药	活血疗伤药
制没药					平		苦		辛				心							脾	肝			['散瘀','定痛','消肿','生肌']	3～10g	活血化瘀药	活血止痛药
炙全蝎					平				辛												肝		有毒	['息风','镇痉','攻毒','散结','通络','止痛']	2.5～4.5g	平肝息风药	息风止痉药
获苓					平			甘			肺		心							脾		肾		['利水','渗湿','健脾','宁心']	9～15g	利水渗湿药	利水消肿药
桑葚子	寒							甘					心								肝	肾		['滋阴','补血','润肠','生津']	10～15g	补虚药	补血药
青蛙皮				凉				甘			肺								膀胱	脾				['利水','消肿','清热','解毒','补虚']	10～15g	其他	其他
川羌活			温				苦		辛										膀胱			肾		['解表','散寒','祛风','除湿','止痛']	6～12g	解表药	辛温解表药
吴白芷			温						辛		肺			大肠			胃							['散风','除湿','通窍','止痛','消肿','排脓']	3～9g	解表药	辛温解表药
川独活			微温				苦		辛										膀胱			肾		['祛风','除湿','通痹','止痛']	3～5g	祛风湿药	祛风湿散寒药
橘络					平		苦	甘			肺									脾				['通络','化痰','止咳']	3～10g	其他	其他
白酒			温				苦	甘	辛		肺		心				胃				肝			['通脉']		其他	其他
松木皮			温				苦				肺			大肠										['祛风','除湿','活血','止血','敛疮','生肌']	9～15g	祛风湿药	祛风湿散寒药
川芍	微寒					酸	苦													脾	肝			['平肝','止痛','养血','调经','敛阴','止汗']	4.5～9g	补虚药	补血药
刺五加皮			温				苦		辛												肝	肾		['祛风湿','补肝肾','强筋骨']	4.5～9g	祛风湿药	祛风湿强筋骨药
熟干地			微温					甘													肝	肾		['补血','滋阴','益精','填髓']	10～30g	补虚药	补血药
琥珀粉					平			甘					心			小肠					肝			['镇惊','安神','散瘀','止血','利水','通淋','去翳','明目']	1～3g	安神药	重镇安神药
抚芎			温						辛			心包	心					胆			肝			['镇心','平肝','消痈','解毒']	3～10g	活血化瘀药	活血止痛药
铁粉				凉					辛				心								肝			['平肝','镇心','消痈','解毒']	10～30g	其他	其他
软石膏	大寒							甘	辛		肺						胃							['清热','降火','除烦','止渴']	15～60g	清热药	清热泻火药
栀子仁	寒						苦				肺		心		三焦									['泻火','除烦','清热','利尿','凉血','解毒','消肿','止痛']	6～10g	清热药分类	清热泻火药
香白芷			温						辛		肺			大肠			胃							['散风','除湿','通窍','止痛','消肿','排脓']	3～9g	解表药	辛温解表药
紫背天葵	寒						苦	甘									胃				肝			['清热','解毒','消肿','散结']	9～15g	清热药	清热解毒药
人工牛黄				凉				甘					心								肝			['清心','豁痰','开窍','凉肝','息风','解毒']	0.15～0.35g	平肝息风药	息风止痉药
水蛙				凉				甘			肺								膀胱	脾				['利水','消肿','清热','解毒','补虚']	10～15g	其他	其他
荜拨		热							辛					大肠			胃							['温中','散寒','下气','止痛']	1～3g	其他	温里药
苏合香油			温						辛				心							脾				['开窍','辟秽','豁痰','止痛']	0.3～1g	其他	开窍药
白檀香			温						辛		肺		心				胃			脾				['行气','温中','开胃','止痛']	2～5g	其他	理气药
草蔻仁			温						辛								胃			脾				['燥湿','行气','温中','止呕']	3~6g	化湿药	祛风湿强筋骨药
焰硝			温				苦			咸	肺		心							脾			小毒	['攻坚','破积','利水','泻下','解毒','消肿']	1.5～3.0g	泻下药	攻下药
山栀子	寒						苦				肺		心		三焦									['泻火','除烦','清热','利尿','凉血','解毒','消肿','止痛']	6～10g	清热药分类	清热泻火药
菩蒌根	寒						微苦	甘			肺			大肠			胃							['清热','涤痰','宽胸','散结','润燥','滑肠']	9～15g	化痰止咳平喘药	清化热痰药
龙脑	寒						苦		辛		肺		心							脾				['开窍','醒神','清热','止痛']	0.03～0.1g	其他	开窍药
归身			温					甘	辛				心							脾	肝			['补血','活血','调经','止痛','润肠','通便']	6～12g	补虚药	补血药
土木鳖				凉			苦	微甘																['散结','消肿','攻毒','疗疮']	0.9～1.2g	清热药	清热解毒药
柳槐枝					平		苦						心								肝			['散瘀','止血','清热','燥湿','祛风','杀虫']	15～30g	清热药	清热燥湿药
熟火黄				凉			苦		辛															['清热','解毒','止血','祛瘀','通便','杀虫']	9～15g	清热药	清热解毒药
黑牵牛子					平		苦														肝	肾		['祛风','除湿','通经','解毒']	3～6g	祛风湿药	祛风湿散寒药
白牵牛子	寒						苦				肺			大肠								肾		['泻水','通便','消痰','涤饮','杀虫','攻积']	3～6g	泻下药	润下药
川贝母粉	微寒						苦	甘			肺		心											['清热','润肺','化痰','止咳']	6~10g	其他	清化热痰药
熟甘草			温					甘			肺		心				胃			脾				['补脾','和胃','益气','复脉']	2～10g	补虚药	补气药
兰香				凉					辛		肺										肝			['宣散','风热','清头目','透疹']	3～6g	解表药	辛凉解表药
酒知母	寒						苦	甘			肺						胃					肾		['清热','泻火','生津','润燥']	6～12g	清热药	清热泻火药
煅青礞石					平			甘		咸	肺		心								肝			['坠痰','下气','平肝','镇惊']	3～6g	安神药	重镇安神药
炙蜈蚣			温						辛												肝			['息风','镇痉','攻毒','散结','通络','止痛']	3～5g	平肝息风药	息风止痉药
后下
稀签草	寒						苦		辛												肝	肾		['祛风湿','利关节','解毒']	9～12g	祛风湿药	祛风湿强筋骨药
寄生					平		苦	甘													肝	肾		['补肝肾','强筋骨','祛风湿','安胎元']	9～15g	祛风湿药	祛风湿强筋骨药
辰茯苓					平			甘			肺		心							脾		肾		['利水','渗湿','健脾','宁心']	9～15g	利水渗湿药	利水消肿药
姜竹茹	微寒							甘									胃	胆		脾				['清热','化痰','除烦','止呕']	4.5～9g	化痰止咳平喘药	清化热痰药
蛰虫	寒									咸											肝		小毒	['破血','化瘀','续筋','接骨']	3～10g	活血化瘀药	破血消癥药
广角粉	寒						苦														肝			['清热','凉血','解毒','定惊']	1.5-3g	清热药	清热凉血药
诃子肉					平	酸	苦				肺			大肠										['涩肠','敛肺','降水','利咽']	3～9g	收涩药	敛肺涩肠药
荜拔		热							辛					大肠			胃							['温中','散寒','下气','止痛']	1～3g	其他	温里药
广木香			温				苦		辛					大肠	三焦		胃	胆		脾				['行气','止痛','健脾','消食']	3～10g	其他	理气药
牡丹					平		苦														肝			['活血','调经']	3～6g	活血化瘀药	活血调经药
淫羊霍			温					甘	辛												肝	肾		['补肾','强骨','祛风','除湿']	3～9g	补虚药	补阳药
姜炭			温				苦		辛											脾	肝	肾		['温经','止血','温脾','止泻']	1～6g	止血药	温经止血药
大腹子			微温						辛					大肠		小肠	胃			脾				['行气','宽中','行水','消肿']	6～12g	利水渗湿药	利水消肿药
巴戟肉			微温					甘	辛												肝	肾		['补肾阳','强筋骨','祛风湿']	3～10g	补虚药	补阳药
莲肉					平			甘					心							脾		肾		['补脾','止泻','益肾','固精','养心','安神']	6～15g	收涩药	固精缩尿止带药
大豆				凉				甘													肝	肾		['补肝','补肾','祛风','解毒']	9～15g	补虚药	补气药
干荷叶					平		苦										胃			脾	肝			['清暑','化湿','升发','清阳','凉血','止血']	3～10g	清热药	清热凉血药
生南星			温				苦		辛		肺									脾	肝		有毒	['化痰','燥湿','祛风','止痉','散结','消肿']	3～9g	化痰止咳平喘药	温化寒痰药
生川乌		热					苦		辛				心							脾	肝	肾	大毒	['祛风','除湿','温经','止痛']	3～9g	祛风湿药	祛风湿散寒药
生附子		热						甘	辛				心							脾		肾	大毒	['回阳','救逆','补火','助阳','散寒','止痛']	3～15g	其他	温里药
桂枝尖			温					甘	辛		肺		心						膀胱					['发表','解肌','温经','通脉','助阳','化气','平冲','降气']	3～9g	其他	辛温解表药
制川乌		热					苦		辛				心							脾	肝	肾	大毒	['祛风','除湿','温经','止痛']	3～9g	祛风湿药	祛风湿散寒药
制草乌		热					苦		辛				心							脾	肝	肾	大毒	['祛风','除湿','散寒','止痛']	1.5～3g	祛风湿药	祛风湿散寒药
广三七			温				微苦	甘									胃				肝			['散瘀','止血','消肿','定痛']	5～10g	止血药	化瘀止血药
泽兰叶			微温				苦													脾	肝			['行血','利尿','散郁','舒肝']	4.5～9g	活血化瘀药	活血调经药
牙皂			温						辛	咸	肺			大肠									有毒	['开窍','祛痰','散结','消肿']	1～1.5g	化痰止咳平喘药	温化寒痰药
樟冰		热							辛				心							脾			有毒	['开窍','辟秽','除湿','杀虫','温散','止痛']	0.1～0.2g	其他	开窍药
腰黄			温						辛					大肠							肝			['解毒','杀虫','燥湿','祛痰','截疟']	0.05～0.1g	其他	杀虫止痒药
良姜		热							辛								胃			脾				['温胃','止呕','散寒','止痛']	3～6g	其他	温里药
甲片	微寒									咸							胃				肝			['通经','下乳','消肿','排脓','搜风','通络']	5～9g	活血化瘀药	活血调经药
白胡椒		热							辛					大肠			胃						有毒	['温中','散寒','下气','消痰']	0.1～0.5g	其他	温里药
生草乌		热					苦		辛				心							脾	肝	肾	大毒	['祛风','除湿','散寒','止痛']	1.5～3g	祛风湿药	祛风湿散寒药
制天南星			温				苦		辛		肺									脾	肝		有毒	['燥湿','化痰','祛风','解痉','散结','消肿']	3~10g	化痰药	温化寒痰药
怀熟地黄			微温					甘													肝	肾		['补血','滋阴','益精','填髓']	10～30g	补虚药	补血药
肉蔻仁			温						辛					大肠			胃			脾			有毒	['温中','行气','涩肠','止泻']	3~9g	收涩药	敛肺涩肠药
熟附块		热						甘	辛				心							脾		肾	大毒	['回阳','救逆','补火','助阳','散寒','止痛']	3～15g	其他	温里药
北五味子			温			酸		甘			肺		心									肾		['收敛','固涩','益气','生津','补肾','宁心']	2～6g	收涩药	敛肺涩肠药
故纸			温				苦		辛											脾		肾		['温肾','助阳','纳气','止泻']	3～10g	补虚药	补阳药
家韭子			温					甘	辛												肝	肾		['温补','肝肾','壮阳','固精']	3～9g	补虚药	补阳药
川巴戟天			微温					甘	辛												肝	肾		['补肾阳','强筋骨','祛风湿']	6～15g	补虚药	补阳药
香附子					平		微苦	微甘	辛						三焦						肝			['行气','解郁','调经','止痛']	6～9g	其他	理气药
栝楼实	寒						微苦	甘			肺			大肠			胃							['清热','涤痰','宽胸','散结','润燥','滑肠']	9～15g	化痰止咳平喘药	清化热痰药
瓜蒌实	寒						微苦	甘			肺			大肠			胃							['清热','涤痰','宽胸','散结','润燥','滑肠']	9～15g	化痰止咳平喘药	清化热痰药
老葱			温						辛		肺						胃							['发表','通阳','解毒','杀虫']	9～15g	解表药	辛温解表药
黄酒	寒						苦					心包		大肠			胃			脾	肝			['泻下','攻积','清热','泻火','凉血','解毒','逐瘀','通经','利湿','退黄']	3-15g	泻下药	攻下药
全瓜萎	寒						微苦	甘			肺			大肠			胃							['清热','涤痰','宽胸','散结','润燥','滑肠']	9～15g	化痰止咳平喘药	清化热痰药
大青	寒						苦						心				胃							['清热','解毒','凉血','清斑']	10～15g	清热药	清热解毒药
茅根	寒							甘			肺						胃		膀胱					['凉血','止血','清热','利尿']	9～30g	止血药	凉血止血药
元明粉	寒								辛	咸				大肠			胃							['泻热','通便','润燥','软坚','消肿','散结']	10～15g	泻下药	攻下药
莱菔					平			甘	辛		肺						胃			脾				['下气','祛痰','消食','化积']	4.5～9g	其他	消食药
田三七			温				微苦	甘									胃				肝			['散瘀','止血','消肿','定痛']	5～10g	止血药	化瘀止血药
焦栀子	寒						苦				肺		心		三焦									['泻火','除烦','清热','利尿','凉血','解毒','消肿','止痛']	6～10g	清热药分类	清热泻火药
营蒲			温				苦		辛				心				胃							['开窍','豁痰','醒神','益智','化湿','开胃']	3～10g	其他	开窍药
酥鳖甲	微寒									咸											肝	肾		['滋阴','潜阳','软坚','散结','退热','除蒸']	9～24g	补虚药	补阴药
茶叶				凉			苦	甘			肺		心				胃							['清上','除烦','止渴','化痰','消食','利尿','解毒']	3～9g	其他	其他
延胡			温				苦		辛											脾	肝			['活血','散瘀','理气','止痛']	3～9g	活血化瘀药	活血止痛药
黑栀	寒						苦				肺		心		三焦									['泻火','除烦','清热','利湿','凉血','解毒','消肿','止痛']	6～10g	清热药	清热泻火药
金铃子	寒						苦									小肠			膀胱		肝			['清肝','泻火','行气','止痛']	6～9g	其他	其他
玄胡			温				苦		辛				心							脾	肝			['活血','止痛','行气']	3～10g	活血化瘀药	活血止痛药
炮甲	微寒									咸							胃				肝			['通经','下乳','消肿','排脓','搜风','通络']	5～9g	活血化瘀药	活血调经药
苏梗			温						辛		肺									脾				['理气','宽中','止痛','安胎']	5～9g	其他	理气药
豆豉				凉			苦		辛		肺						胃							['解表','除烦','宣发','郁热']	6～12g	解表药	辛凉解表药
川佛手			温			酸	苦		辛		肺									脾	肝			['舒肝','理气','和胃','止痛']	3～9g	其他	理气药
甲珠	微寒									咸							胃				肝			['活血','消癥','通经','下乳','搜风','通络','消肿','排脓']	5～10g	活血化瘀药	破血消癥药
铁落花				凉					辛				心								肝			['平肝','镇惊','解毒','敛疮','止血']	1～3g	平肝息风药	平抑肝阳药
焦槟榔			温				苦		辛					大肠			胃							['驱虫','消积','下气','行水']	3～9g	其他	驱虫药
素馨花					平		苦														肝			['行气','调经','止痛','清热','散结']	1.5～3g	其他	理气药
生牡砺	微寒									咸								胆			肝	肾		['潜阳','补阴','重镇','安神','软坚','散结','收敛','固涩','制酸','止痛']	9～30g	平肝熄风药	平抑肝阳药
瓜萎根	寒						微苦	甘			肺			大肠			胃							['清热','涤痰','宽胸','散结','润燥','滑肠']	9～15g	化痰止咳平喘药	清化热痰药
鼠妇				凉		酸															肝			['破血','利水','解毒','止痛']	3～6g	活血化瘀药	破血消癥药
葶苈	大寒						苦		辛		肺								膀胱					['泻肺','平喘','行气','消肿']	3～9g	化痰止咳平喘药	止咳平喘药
紫葳	寒					酸	苦														肝			['清热','解毒','活血','止血']	10～15g	清热药	清热解毒药
蟅虫	寒									咸											肝		小毒	['破血','化瘀','续筋','接骨']	3～10g	活血化瘀药	破血消癥药
蜂窠					平			甘									胃							['祛风','攻毒','杀虫','止痛']	3～5g	其他	杀虫止痒药
赤消			温				苦			咸	肺		心							脾			小毒	['攻坚','破积','利水','泻下','解毒','消肿']	1.5～3g	泻下药	攻下药
蜣螂	寒									咸													有毒	['解毒','消肿','通便']	1.5～3g	清热药	清热解毒药
清茶				凉			苦	甘			肺		心				胃							['清上','除烦','止渴','化痰','消食','利尿','解毒']	3～9g	其他	其他
苦梗					平		苦		辛		肺													['宣肺','祛痰','利咽','排脓']	3～9g	化痰止咳平喘药	清化热痰药
白附			温						辛								胃				肝		有毒	['祛风痰','定惊搐','解毒','散结','止痛']	3～6g	化痰止咳平喘药	温化寒痰药
蜜炙柏	寒						苦												膀胱			肾		['清热','燥湿','泻火','除蒸','解毒','疗疮']	3～12g	清热药	清热燥湿药
靛花	寒									咸											肝			['清热','凉血','定惊']	0.9~1.5g	清热药	清热凉血药
滴乳石					平	酸															肝			['化瘀','止血']	3~10g	止血药	化瘀止血药
白糖					平			甘			肺									脾				['润肺','生津']	9~15g	其他	其他
漂东丹	微寒								辛				心							脾	肝		有毒	['拔毒','生肌','杀虫','止痒','坠痰','镇惊','攻毒','截疟']	0.3~0.6g	其他	拔毒生肌药
铅粉	微寒								辛				心								肝		有毒	['拔毒','生肌','杀虫','止痒']	0.3~0.6g	其他	拔毒化腐生肌药
白蜡			温					甘													肝			['止血','生肌','定痛']	3～6g	止血药	收敛止血药
制炉甘石					平			甘												脾	肝			['解毒','明目','退翳','收湿','止痒','敛疮']	---	其他	拔毒生肌药
象皮			温					甘		咸									膀胱	脾				['止血','敛疮']	---	止血药	收敛止血药
梅片	寒						苦		辛		肺		心							脾				['开窍','醒神','清热','止痛']	0.03～0.1g	其他	开窍药
砂仁壳			温						辛								胃			脾		肾		['化湿','开胃','温脾','止泻','理气','安胎']	3～6g	其他	化湿药
铁落				凉					辛				心								肝			['平肝','镇惊']	30~60g	平肝息风药	平抑肝阳药
炙桑白皮	寒							甘			肺													['泻肺','平喘','利水','消肿']	6～12g	利水渗湿药	利水消肿药
瓜壳	寒							甘			肺						胃							['清肺','化痰','利气','宽胸']	9～12g	化痰止咳平喘药	清化热痰药
瓜萎壳	寒							甘			肺						胃							['清肺','化痰','利气','宽胸']	9～12g	化痰止咳平喘药	清化热痰药
制乌头		热					苦		辛				心							脾	肝	肾	大毒	['祛风','除湿','温经','止痛']	3～9g	祛风湿药	祛风湿散寒药
赤箭					平			甘													肝			['平肝','息风','止痉']	3～9g	平肝息风药	息风止痉药
干蝎					平				辛												肝		有毒	['息风','镇痉','攻毒','散结','通络','止痛']	2.5～4.5g	平肝息风药	息风止痉药
川苛			温						辛			心包	心					胆			肝			['活血','行气','祛风','止痛']	3～10g	活血化瘀药	活血止痛药
秦九					平		苦		辛								胃	胆			肝			['祛风湿','退虚热','舒筋','止疼']	5～10g	祛风湿药	祛风湿清热药
肉桂心		大热						甘	辛				心							脾	肝	肾		['补火','助阳','引火','归元','散寒','止痛','温通','经脉']	1～4.5g	其他	温里药
川乌头		热					苦		辛				心							脾	肝	肾	大毒	['祛风','除湿','温经','止痛']	3～9g	祛风湿药	祛风湿散寒药
制附		热						甘	辛				心							脾		肾	大毒	['回阳','救逆','补火','助阳','散寒','止痛']	3～15g	其他	温里药
天竹黄	寒							甘					心								肝			['清热','豁痰','凉心','定惊']	3～9g	化痰止咳平喘药	清化热痰药
守宫	寒									咸											肝			['化痰','散结','利尿']	1.5～3g	其他	其他
羚角	寒									咸			心								肝			['平肝','息风','清肝','明目','散血','解毒']	1～3g	平肝息风药	息风止痉药
贯仲	微寒						苦										胃				肝			['清热','解毒','杀虫','止血']	5～15g	清热药	清热解毒药
蒸木香			温				苦		辛					大肠	三焦		胃	胆		脾				['行气','止痛','健脾','消食']	3～10g	其他	理气药
豹骨			温					甘	辛												肝	肾		['祛风','通络','强筋','健骨']	9～18g	祛风湿药	祛风湿强筋骨药
金箔					平		苦		辛				心								肝			['镇心','安神','解毒']	---	安神药	重镇安神药
象贝	寒						苦				肺		心											清热化痰，开郁散结	3～10g
栀皮	寒						苦				肺		心		三焦									['泻火','除烦','清热','利湿','凉血','解毒','消肿','止痛']	6-10g	清热药	清热泻火药
地黄	寒							甘					心								肝	肾		['清热','凉血','养阴','生津']	9～15g	清热药	清热凉血药
黑附子		大热						甘	辛				心							脾		肾	大毒	['回阳','救逆','补火','助阳','散寒','止痛']	3～15g	其他	温里药
玉郎伞					平		苦	甘	辛												肝			消瘀 消肿 补虚 宁神
瓜蒌仁	寒							甘			肺			大肠			胃							['清热','涤痰','宽胸','散结','润燥','滑肠']		化痰止咳平喘药	清化热痰药
冬枣			温					甘									胃			脾				补脾胃 益气 生精 调和 营卫 解毒
母猪藤	寒					酸	苦						心				胃				肝			['舒筋','活血']	外用适量	清热药	清热解毒药
黑米	寒							甘						大肠			胃							['止渴','除烦','调肠胃']	15~25g	其他	其他
壁虎	寒									咸											肝	肾		['祛风','活络'，'散结','止痛'，'镇痛','解痉']	2~5g	平肝息风药	息风止痉药
茄根				凉				甘						大肠		小肠	胃			脾				['清热','利湿','祛风','止咳']	18.5~35g	清热药	清热燥湿药
草血竭	寒						苦		辛								胃			脾		肾		['散瘀','止血'，'下气','消积'，'解毒'，'利湿']	15~25g	止血药	化瘀止血药
橘叶					平		苦		辛															['疏肝','行气'，'化痰'，'消肿毒']	6.25~9.4g	其他	理气药
脐带			温					甘		咸	肺		心								肝			['益肾'，'纳气']	0.6~2g	补虚药	补阳药
鸡蛋黄					平			甘			肺		心									肾		['滋阴','润燥'，'养血','息风']		补虚药	补血药
无名异					平			甘																['去瘀','止痛'，'消肿','生肌']	2.5~4.7g	活血化瘀药	活血止痛药
柿霜				凉				甘																['清热'，'润燥'，'化痰']	3~9g	化痰止咳平喘药	止咳平喘药
橄榄					平	酸		甘			肺						胃							['清肺'，'利咽'，'生津'，'解毒']	4.7~9.4g	清热药	清热解毒药
龟胶				凉				甘		咸			心								肝	肾		['滋阴'，'养血'，'止血']	3~9g	补虚药	补阴药
灵砂			温					甘					心				胃						有毒	['祛痰','降逆','安神','定惊']	0.3~1g	其他	温里药
柿树叶	寒						苦				肺													['止渴'，'生津'，'平喘']	3~9g	化痰止咳平喘药	止咳平喘药
鹿骨		微热						甘														肾		['补虚赢','强筋骨']	15~30g	补虚药	补阳药
鹿鞭			温							咸									膀胱		肝	肾		['补肾'，'壮阳'，'益精']	6~15g	补虚药	补阳药
鹿筋			温							微咸											肝	肾		['壮筋骨']	6~12g	祛风湿药	祛风湿强筋骨药
鹿血			温					甘		咸											肝	肾		['养血','益精','止血','止带']	3~6g	补虚药	补阴药
茱萸			微温			酸															肝	肾		['补益','肝肾','收涩','固脱']	6～12g	收涩药	固精缩尿止带药
蛇黄	寒							甘				心包									肝			安神镇惊 止血定痛
水银	寒								辛				心								肝	肾		消毒，泻下，利尿，杀虫，灭虱
云南白药			温				微苦	甘									胃				肝			['散瘀','止血','消肿','定痛']	5～10g	止血药	化瘀止血药
千金子仁			温						辛		肺						胃		膀胱				有毒	逐水消肿 破症杀虫
蛴螬			微温							咸											肝		有毒	破血，行瘀，散结，通乳
梓白皮	寒						苦										胃	胆						清热利湿，降逆止吐，杀虫止痒	5～9g
金雀根					平		苦		辛		肺									脾				清肺益脾，活血通脉	25-50g
樗白皮	寒						苦							大肠			胃							除热，燥湿，涩肠，止血，杀虫	10-20g
莲花蕊					平		苦	甘					心									肾		清心，益肾，涩精，止血	3～9g
百草霜			温						辛		肺						胃				肝			止血，止泻，消积	3～9g
鬼臼				凉			苦		辛		肺										肝		有毒	化痰散结，祛瘀止痛，清热解毒	3～12g
草河车	寒						苦														肝		小毒	清热解毒，平喘止咳，熄风定惊	3～10g
豨签草	寒								辛												肝	肾		祛风湿，利关节，解毒	9～12g
马槟榔	寒							甘			肺									脾				清热解毒，生津止渴	3～6g
枯矾	寒					酸					肺			大肠			胃			脾				消痰，燥湿，止泻，止血，解毒，杀虫	1～5g
巴豆霜		热							辛					大肠			胃						大毒	泻寒积，通关窍，逐痰，行水，杀虫	0.1～0.3g	泻下药
蚕蛾			温							咸											肝	肾		补肾壮阳，涩精，止血，解毒消肿	1.5～5g
法半夏			温						辛		肺						胃			脾			小毒	燥湿化痰	3～9g
桉油				凉			苦		辛															祛风止痛	9～15g	辛凉解表药
薄荷脑				凉					辛		肺													疏风，清热，解毒	0.02～0.1g
紫硇砂			温				苦		辛	咸	肺						胃						有毒	破瘀消积，软坚蚀腐	0.6～1g
甘青青兰	寒						苦	甘													肝			止咳化痰，和胃疏肝，清热利水	3～15g
兔耳草	寒						苦	甘			肺										肝			清热解毒，降压，调经	5～15g
川西獐牙菜				凉			苦	甘																清肝利胆，退热	3～5g
印度獐牙菜				凉			苦																	清肝利胆，退热	6～9g
石榴花					平	酸	苦				肺					小肠	胃		膀胱	脾				凉血，止血	3～6g
石榴			温			酸		甘						大肠								肾		收敛止血，清热抑菌，安胎，解酒	5～12g
波棱瓜子	寒						苦																	清肝利胆，健脾助运	2.5～5g
止泻木子				凉			苦																	清热，利胆，止泻	6～9g
大托叶云实			温				苦		辛		肺			大肠										温肾，逐寒	1～3g
光明盐					平					咸											肝	肾		祛风明目，消食化积，解毒	0.9～1.5g
紫檀香	寒									咸											肝			消肿，止血，定痛	3～6g
珊瑚					平			甘					心								肝			去翳明目，安神镇惊，敛疮止血	0.3～0.6g
角茴香	寒						苦														肝		小毒	清热解毒，消炎，镇痛	6～9g
绿绒蒿	寒						苦							大肠							肝	肾	小毒	清热利湿，止咳	3～6g
小檗	大寒						苦				肺									脾	肝			清热燥湿，泻火解毒	5～15g
螃蟹	寒									咸							胃				肝			清热解毒，补骨添髓，养筋接骨，活血祛痰，利湿退黄	3～9g
手参					平			甘			肺						胃			脾				止咳平喘，益肾健脾，理气和血，止痛	9～15g
獐牙菜	寒						苦						心				胃				肝			清热解毒，疏肝利胆	10～15g
巴夏嘎	寒						苦																	清热，愈疮，生肌，止血，明目
力嘎都	寒						苦				肺													清肺，降气，化痰止咳
榜嘎				凉			苦				肺						胃						小毒	清热，解毒，利湿	2～4g
石灰华	寒							甘																清热补肺	5g
藏紫草				凉				甘																清热凉血，养肺
酸藤果					平	酸		甘									胃							补血，收敛止血	9～15g
制何首乌			温				苦	甘					心								肝	肾		补肝肾，益精血，乌须发，强筋骨	6～12g
驴肾			温					甘		咸												肾		益肾壮阳，强筋健骨	9～15g
薄荷油				凉					辛		肺										肝			疏风，清热
肉桂油		热						甘	辛								胃			脾				驱风，健胃	0.006～0.03g
广藿香油			微温						辛		肺						胃			脾				['芳香','化浊','开胃','止呕','发表','解暑']	3～9g	其他	化湿药
乌鸡					平			甘													肝	肾		养阴，退热，补中
三叉苦	寒						苦						心											清热解毒，祛风除湿	15～50g
姜半夏			温						辛		肺						胃			脾			有毒	燥湿化痰，降逆止呕	3～9g
生晒参			温				微苦	甘			肺									脾				补气固脱，补肺益脾，生津，安神，益智	1.5～9g
藏茜草							苦		辛															清热凉血	6～9g
炒白术			温				苦	甘									胃			脾				健脾益气，燥湿利水，止汗
盐车前子	寒							甘											膀胱			肾		补肝肾，明目
盐补骨脂			大温				苦		辛	咸												肾		补肾壮阳
驴鞭			温					甘		咸											肝	肾		补肾壮阳，强筋壮骨	9～15g
狗鞭			温							咸												肾		温肾壮阳，补益	3～9g
蛇胆				凉			微苦	甘												脾	肝			清热解毒，化痰镇痉
金盏银盘					平			甘																疏表清热，解毒，散瘀	15～50g
牛鞭			温					甘		咸											肝	肾		补肾壮阳，益肾暖宫
羊鞭			温					甘		咸												肾		补肾壮阳，益气生精
岗梅				凉			苦	甘			肺						胃							清热解毒，生津，利咽，散瘀止痛	30～60g
当归尾			温					甘	辛				心							脾	肝			活血祛瘀
小叶枇杷			微温				苦		辛		肺													祛痰，止咳，平喘	15～30g
蜂王浆					平	酸		甘												脾	肝	肾		滋补，强壮，益肝，健脾
人中白				凉						咸	肺		心						膀胱					清热降火，止血化瘀	3～6g
天然冰片				凉			苦		辛		肺		心							脾				开窍醒神，清热止痛	0.3～0.9g
龙血竭					平			甘		咸	肺									脾		肾		活血散瘀，定痛止血，敛疮生肌	3～6g
丁香油		大热						甘	辛								胃			脾		肾		暖胃，降逆，温肾，止痛
羚羊角粉	寒									咸			心								肝			平肝熄风，清肝明目，清热解毒	0.3～0.6g
竹叶柴胡	微寒						苦				肺							胆			肝			解表和里，升阳，疏肝解瘀
清半夏			温						辛								胃			脾			有毒	燥湿化痰，降逆止呕，消痞散结	3～9g
鹿角			温							咸											肝	肾		温肾阳，强筋骨，行血消肿	6～15g
鹿角霜			温							咸											肝	肾		温肾助阳，收敛止血	9～15g
蚕砂			温					甘									胃			脾	肝			燥湿、祛风、和胃化浊、活血定痛	15～40g
橘红			温				苦		辛		肺									脾				理气宽中，燥湿化痰	3～10g
银朱			温						辛		肺		心										有毒	攻毒，杀虫，燥湿，祛痰	0.2～0.5g
铁棒锤		大热					苦		辛		肺		心										大毒	活血祛瘀，驱风除湿，止痛消肿
水牛角浓缩粉	寒						苦						心								肝			清热解毒，凉血，定惊	1.5～3g
半夏曲					平				辛		肺			大肠						脾			有毒	化痰止咳，消食宽中	3～9g
碱花					平			甘		咸							胃						小毒	消积，祛瘀，除虫，润肠	0.6～1.8g
千金子霜			温						辛					大肠							肝	肾	有毒	泻下逐水，破血消癥	0.5～1g
大红袍			温				微苦						心								肝			调经活血，止痛，收敛	25～50g
丁香罗勒油
黑冰片			温				苦		辛															清希拉，消食，杀粘，破痞
沙棘膏					平	酸																		清热止咳，活血化瘀，愈溃疡	2～3g
蒲桃					平			甘						大肠										凉血，收敛	25～50g
芒果核					平	酸										小肠	胃							健胃消食，化痰行气	6～12g
山矾叶					平	酸		微甘			肺						胃							清热解毒，收敛止血	15～30g
瓜蒌子	寒							甘			肺			大肠			胃							润肺化痰，滑肠通便	9～15g
醋五味子			温			酸		甘			肺		心									肾		收敛固涩，益气生津，补肾宁心	1.5～6g
天门冬	寒						苦	甘			肺											肾		滋阴润燥，清肺降火	6～15g
蛤壳	寒									咸	肺						胃					肾		清肺化痰，软坚散结，利尿，制酸	10～15g
关木通	寒						苦						心			小肠			膀胱				有毒	清心火，利小便，通经下乳	3～6g
槐米	微寒						苦							大肠							肝			凉血止血，清肝泻火
旋复花			温							咸	肺						胃				肝		小毒	消痰，下气，软坚，行水
马钱子粉			温				苦													脾	肝		大毒	通络止痛，散结消肿	0.3～0.6g
芙蓉叶				凉					微辛		肺										肝			清肺凉血，消肿排脓
铁筷子				凉			苦				肺										肝		小毒	清热解毒，活血散瘀，消肿止痛	5～10g
甜叶菊					平			甘			肺						胃							生津止渴，降血压	3～10g
炒麦芽					平			甘									胃			脾				行气消食，健脾开胃，退乳消胀	10～15g
硝石			温				苦			咸	肺		心							脾			有毒	攻毒消肿，利水泻下，破坚散积
牛胆粉	大寒						苦				肺							胆			肝			清肝明目，利胆通肠，解毒消肿	0.3～0.9g
醋延胡索			温				苦		辛				心				胃				肝			活血，行气，止痛
黑老虎根			温				微苦		辛											脾	肝			行气散瘀，通络止痛
西瓜霜	寒									咸	肺			大肠			胃							清热泻火，消肿止痛	0.5～1.5g
香墨					平		苦																	止血，消肿	1～3g
防已	寒						苦		辛		肺								膀胱					祛风止痛，利水消肿	5～10g
广防已	大寒						苦		辛		肺								膀胱					祛风止痛，清热利水	4.5～9g
桂子			温					甘	辛								胃							温中，和胃	3～6g
白果仁					平		苦	甘			肺												有毒	敛肺气，定喘嗽，止带浊，缩小便
紫荆皮					平		苦														肝			活血，通淋，解毒	6～15g
黑云香
方海	寒									咸							胃				肝			清除火热，解除毒邪，利水渗湿
猪胆汁	寒						苦			咸	肺		心					胆			肝			益肺，补脾，润燥
葫芦巴			温				苦															肾		温肾，祛寒，止痛
钻地风				凉																脾				舒筋活络，祛风活血	9～15g
食盐	寒									咸				大肠		小肠	胃					肾		涌吐，清火，凉血，解毒	1.5～5g
熊胆粉							苦						心					胆			肝			清热解毒，息风止痉，清肝明目	0.25～0.5g
北败酱	微寒						苦							大肠			胃				肝			清热燥湿，消肿排脓，凉血止血，化瘀解毒	9～15g
炒僵蚕					平				辛	咸	肺						胃				肝			祛风解痉，化痰散结	3～10g
生马钱子			温				苦													脾	肝		大毒	通络止痛，散结消肿	0.3～0.6g
制远志			温				苦		辛		肺		心									肾		养心安神，益智，祛痰，消肿
煅牡蛎	微寒									咸											肝	肾		收敛固涩，制酸止痛，重镇安神，软坚散结	15～30g
过岗龙					平		苦		辛												肝			祛风除湿，活血止痛	9～15g
北寒水石	寒								辛	咸			心				胃					肾		清热降火，利窍，消肿	9～15g
炒莱菔子					平			甘	辛		肺						胃			脾				消食除胀，降气化痰	6～10g
珍珠粉	寒							甘		咸			心								肝			安神定惊，清肝明目，解毒生肌	0.6～1g
地榆炭	微寒					酸	苦							大肠							肝			凉血止血，解毒敛疮	9～15g
醋香附					平		微苦	微甘	辛						三焦					脾	肝			理气解郁，止痛调经
姜厚朴			温				苦		辛		肺			大肠			胃			脾				宽中理气，化湿开郁，消积平喘	3～9g
盐杜仲			温					甘													肝	肾		补肝肾，强筋骨，安胎	6～10g
酒当归			温					甘	辛				心								肝			补血活血，调经止痛，润肠通便
醋三棱					平		苦													脾	肝			破血行气，消积止痛
炒鸡内金					平			甘								小肠	胃		膀胱	脾				健胃消食，涩精止遗	3～9g
炒白芍			温				苦	甘									胃			脾				养血调经，平肝止痛，敛阴止汗	10～15g
醋龟甲	微寒							甘		咸			心								肝	肾		滋阴抑阳，益肾健骨，固经止血，养血补心
酒大黄	寒						苦						心	大肠			胃			脾	肝			清上焦，血分热毒	4～10g
麸炒枳壳			温			酸	苦		辛								胃			脾				理气宽中，行滞消胀	3～9g
